# Supplementary material for: RNA sequencing (RNA-Seq) of lymph node, spleen, and thymus transcriptome from wild Peninsular Malaysian cynomolgus macaque (Macaca fascicularis)
Source: PeerJ. 2017 Aug 17;5:e3566. doi: 10.7717/peerj.3566 (PMC5563440; doi:10.7717/peerj.3566)
Supplement: Table S1 [file peerj-05-3566-s017.xlsx]

## Sheet: Sheet1
Table S1: Selected genes for NanoString nCounter XT Gene Expression assay validation of RNA-Seq gene expression profiles
TISSUE COMPARISON	GENE	GENE DESCRIPTION	Probe A Sequence	Probe B Sequence
Lymph vs. Spleen	AIF1L	Allograft inflammatory factor 1 like	TCATTGTCTGGGTCTCACTTTCCTATTGGACTCTAAGTTCACCGTGTGGACGGCAACTCAGAGATAACGCATAT	CGAAAGCCATGACCTCCGATCACTCCCCATACCTCCCCCTCCCTAACATTTATCTCATTG
	CLEC4G	C-type lectin domain family 4 member G	AGAAAAAACTCTTTGGCGATCATCTCCAGGAGCCAGGGAGGTGAGCAGCCAGCAGACCTGCAATATCAAAGTTATAAGCGCGT	CGAAAGCCATGACCTCCGATCACTCCTAGTGTTTCTGAGACTCAGTAGTGCTGGATGAGGA
	GPR182	G protein-coupled receptor 182	GTTGAAAAGGTTGAGCAGCTCGGTCCAGTTGTGGATATCTCCAAGCGATTGCTGCATTCCGCTCAACGCTTGAGGAAGTA	CGAAAGCCATGACCTCCGATCACTCGTGCTCTCGCTGAGCTCCACATGGCACTCAAACAAAGTGTG
	LIFR	Leukemia inhibitory factor receptor alpha	GTCCCACACTTGCAAATTGTTAGTTACACACTTCAAATCATGAGGAGCTCCCCGAAGCAATACTGTCGTCACTCTGTATGTCCGT	CGAAAGCCATGACCTCCGATCACTCATAATCAGTACCACGGCCTGTTCCAGAGGGTGCTTTCCAATAACA
	MEOX2	Mesenchyme Homeobox 2	TCAATGCAAGTTCATCCTCGGCATCTTCACTTTGGAGGCATCTTGAATAACCAATTTGGTTTTACTCCCCTCGATTATGCGGAGT	CGAAAGCCATGACCTCCGATCACTCAGCAAATACCTGCCCACTGTAATACACATGACCTCACACATCTGGAATGT
	NKX2-3	NK2 homeobox 3	CATGCTTTTAATTTGTTATGTCCTTGGGCTCCCCGCCAATGCAAACTGGAGAGAGAAGTGAAGACGATTTAACCCA	CGAAAGCCATGACCTCCGATCACTCCTGGAATTTCTCAAGCCACGACTCCCATTTTTCTCTCCTT
	SHISA3	Shisa family member 3	TTGGCTGCTGCGAGGGCTCCTTGGGTCTCAAACAGGTGCAACAATAAATACCTGCCAATGCACTCGATCTTGTCATTTTTTTGCG	CGAAAGCCATGACCTCCGATCACTCTAAGGTCTCTGTCTGATAGCTGCGGAGTGAGAAGCGGA
	TXK	TXK tyrosine kinase	ATCAGCCCAACTGGATATCGGAGACGGGTCATGAGACCGGCACCCCTCCAAACGCATTCTTATTGGCAAATGGAA	CGAAAGCCATGACCTCCGATCACTCCACTTTTCGTAGCTAAACCCAGCTGTGGCTGGTAAACAACTGCCC
Lymph vs. Thymus	ADRB1	Adrenoceptor beta 1	CACCAGGGCTGAGATGGCCCACACGGTGCACACGAGGCCCACCAGTTAGCGTGGCGTATACCATGTTGTTAACA	CGAAAGCCATGACCTCCGATCACTCCGTCGCTCTCCGCCCGCCACCAATGCATGAGGATGGGCAGGAAGGA
	CEBPD	CCAAT/enhancer binding protein (C/EBP), delta	TGTAGCTTCTTTGCGCTCGTATGTCCCAAGAAACTGCAGCGCGCTATGCAGACGAGCTGGCAGAGGAGAGAAATCA	CGAAAGCCATGACCTCCGATCACTCAAATAAACACGTTTAGCTTCTCTCGCAGTTCAGTGGTGGTAAGTCCAGGC
	CLEC2D	C-type lectin domain family 2 member D	GGCAGTTAGCTCTTATTGCACTTAAAGCAACAACCATTCCACACACTATGCCTACGTATATATCCAAGTGGTTATGTCCGACGGC	CGAAAGCCATGACCTCCGATCACTCAATCCAGCTTTCTGGGCATGCAGCTTGAAGACATACTGATGGCTTTTGAT
	CTSS	Cathepsin S	CTCTGCCATAAGGAAGTTCAGTATACTTTGAACATGTGGCAGCACGATATCAGCAAGAAGGAGTATGGAACTTATAGCAAGAGAG	CGAAAGCCATGACCTCCGATCACTCACCAACAGACACTGGGCCTTTATTGGCCACAACTTCTTTCAGGACATCTT
	FOXQ1	Forkhead box Q1	GTAGTCATATCATTTATAGTGTGGAAAGGTTCCCTGATGCACTTAGAGGGCTAGGACGCAAATCACTTGAAGAAGTGAAAGCGAG	CGAAAGCCATGACCTCCGATCACTCCCTGGAAACGCCACATACGTACACGGATGAGGGCTCAGAAACCCCAAACA
	PIK3R5	Phosphoinositide-3-kinase regulatory subunit 5	ATCTGGTTAAAGCCCTTCTTGGATTTGGAGTTCTGCCCATACGAAATTTGAGCAAGCAATTGAAGGCTTAGA	CGAAAGCCATGACCTCCGATCACTCTCTGCACCTTGTCCACTTTGATCTGCGATGTGCTA
	PLCB1	Phospholipase C beta 1	TTTCACTTCTATGTAGACAAAGACAGCAGGCAGCATCAGAGGCTGGCTAGCCCAGATCCTACGAGATGAGCTACGTAACTA	CGAAAGCCATGACCTCCGATCACTCGGGTTTGATAAAGCTTCAATGACATCTGCATATGTGTCTGGCACATAGTC
	PRH2	Proline rich protein HaeIII subfamily 2	GCCCAGCAGGAAGGGTTGGGTAGGACGTTGTTTGTGTCTAATTTCTAAAACAACAGCCACTTTTTTTCCAAATTTTGCAAGAGCC	CGAAAGCCATGACCTCCGATCACTCCAGGTCAAGTGTATCCCTCATTTCTTTGGGACTCTA
Spleen vs. Thymus	CCL28	C-C motif chemokine ligand 28	TTAACAGTATGGTTGTGCGGGCTAACACAGATTCTTCTGCGCTTGACATGCATTCGCAACCATGTGAAGTAATGTGAGCGTACTT	CGAAAGCCATGACCTCCGATCACTCCATTTTTCTTGGCTGCTTGCACTTTCATCCACTGC
	CD5L	CD5 molecule like	TGAGGATTCCAGGCAGCTTGGGAAGAGGCATGAAAGGCCAGAACCAACGTCCGGGAATCGGCATTTCGCATTCTTAGGATCTAAA	CGAAAGCCATGACCTCCGATCACTCATAGATCTTGCCTTAGTAATGGTCTGCACATTCGGTCAAAGTGACAGGTC
	DVL1	Dishevelled segment polarity protein 1	GCAGGGCTGAGGGCAAGCGCGAGTCACATGATGTCCACGAAGAACTCACACTTGAGCTCTAGGCCCAAAACGACCTTAATGGTCA	CGAAAGCCATGACCTCCGATCACTCCTATGTGTGCAGCAGGACCACAGGCTCCCCATCTCGG
	FCGR2A	Fc fragment of IgG receptor Iia	CTTTCTGAGGGCAATCGTTTGACGTCCAAGTGGCTCATTTCGCTATCAGCTAATAGGGTCGGCTCAACAGTGTATCC	CGAAAGCCATGACCTCCGATCACTCCGGCTGTTTCATAGTCATTGTTGGTTTCTTCAAGTTGTCT
	GBP1	Guanylate binding protein 1	TTTGAAATCCCTCTTTTAGCAGTCGCTCCTGTTCCTGAAGTTTAAGAGCGCCGATCTTCATAACGGACAAACTGAACGGGCCATT	CGAAAGCCATGACCTCCGATCACTCCATTTTCTTCTGGAGATCCTGTATCTCATTTTGCATTTTTCTGCTTTCTG
	KLK1	Kallikrein 1	GTCTACACACTGGAGATCATCTGGAAATGAGAAATTCTCTGGTTCGATGCCAGATAAGGTTGTTATTGTGGAGGATGTTACTACA	CGAAAGCCATGACCTCCGATCACTCGCTTTGGCGCACTCATCATTGGGCAGGATTTCGAG
	MARCKSL1	MARCKS like 1	TCTTCAACTGGCCTTAGAACCAGATGGCTGATGGGAGAATCCACAGGCTATCAATTCGTGACCCCGATCATCCAGTCCAGAA	CGAAAGCCATGACCTCCGATCACTCACAGGAGCATTTCACATCACTAACCTAACTTGGGAAGCTGTAAGGGACCA
	MYO7A	Myosin VIIA	CTTAAAGCGGGCGTAATTGACCACATCCTCTTTGACCTTCTGGGCCTGGAGTTTATGTATTGCCAACGAGTTTGTCTTT	CGAAAGCCATGACCTCCGATCACTCGGGCCTGAGAATTTGTAGGCTTCATAAAACCTGGAGAAGAGTAAGGGCCA
Housekeeping Genes	GAPDH	Beta-actin	CCAGCATCGCCCCACTTGATTTTGGAGGGATCTCGCCTCAAGACCTAAGCGACAGCGTGACCTTGTTTCA	CGAAAGCCATGACCTCCGATCACTCTGGTGGTGAAGACACCAGTGGACTCCACGACATACTCAGCG
	ACTB	Glyceraldehyde-3-phospate dehydrogenase	TGTAACGCAACTAAGTCACAGTCCGCCTAGAAGCATTTGCGGTGGACGATCATCCTCTTCTTTTCTTGGTGTTGAGAAGATGCTC	CGAAAGCCATGACCTCCGATCACTCTGCCAATCTCATCTTGTTTTCTGCGCAAGTTAGGTTTTGTCAAGAAAGGG
	YWHAZ	Tyrosine 3-mono-oxygenase/tryptophan 5-monooxygenase activation protein, zeta polypeptide	CAATGATCCCTTTTATTCCCCACCAGGACAAACCAATATGTAGGCAGTTTCACAATTCTGCGGGTTAGCAGGAAGGTTAGGGAAC	CGAAAGCCATGACCTCCGATCACTCAGTGCTCCAGACCTTAAAGTACCCACAATTACTACACCTGTGACTGGAAC
