# Supplementary material for: RNA sequencing (RNA-Seq) of lymph node, spleen, and thymus transcriptome from wild Peninsular Malaysian cynomolgus macaque (Macaca fascicularis)
Source: PeerJ. 2017 Aug 17;5:e3566. doi: 10.7717/peerj.3566 (PMC5563440; doi:10.7717/peerj.3566)
Supplement: Table S3 [file peerj-05-3566-s019.xlsx]

## Sheet: Spleen vs. Lymph
Differentially expressed genes in Spleen vs. Lymph
Gene Symbol	Normalised fold change (+ upregulated in Lymph; - upregulated in Spleen)	Annotations - Database	Annotations - UniProt Accession	Annotations - Database object name	Annotations - Assigned by
LOC102138959	-∞
AIF1L	-221.19	UniProtKB	F6Y130, A0A096P0F4, K7FJ54, A0A0D9RQN0, G1RPZ0, A0JNQ0, G3RLU3, M3W3I0, H9G5A1, U3CRC6, G1TZJ5, G1N1T7, H2R659, F6Y121, K7B1J2, U6CUQ8, G3N1Z0, F7CYG5, Q5JUP1, V8N8X9, Q5JUP3, G3WXJ7, T2M716, Q9BQI0, I3MHP6, H2PTQ1, W5PB75, F7DC32, G1P3E6, H9G0F1, U3IZL4, F1PFL7, A6PVM9, F6SU15, Q5RDI4, H3BB03, H0VRQ2, F6Y0F5, H0Z309, G3SME0, F6QSA6, E3TDL1, U3JFF8, G1MCV7	Uncharacterized protein	Ensembl
LOC102119108	-190.77
PPBP	-153.38	UniProtKB	J9P346, P02775, H2PDL0, M3WT57, H0XTW2, G1M6X5, G3UDQ5, G3RZ42, A0A096MNQ3, G1R8X8, M3YCS6, P43030, F1PMC0, I3MTR6, H2QPN7, F6Q841, H0WD04, F6SCP6, A0A0D9QXK2, E1BIK4, F6WJ79, W5PZ55, F6WJ66	C-X-C motif chemokine	Ensembl
NKX3-2	-115.46	UniProtKB	A0A0D9RUW3, G1S2H4, H2RAB1, G3U886, A0A096NZF4, G1PBA3, F7HTH1, I3N716, G1U3H9, H3A332, G1LRX4, F7AA59, F6T3D5, E2RDY4, K7FZV0, K7A5T9, G3U138, H0V5H4, M3XN20, F7GK75, E1B710, H0XDN2, G1SWE0, G3QZS9, H2PCX8, P78367, K7FZU4, A0A0C9QBI7, I3LTH9	Uncharacterized protein	Ensembl
TCF21	-82.79	UniProtKB	W5PYZ8, F7B096, W8CEK9, F6UVM0, E2R3U1, H0W7D6, D2HJ40, U3IK84, G1RX40, U3KBH7, J9PAD9, H2PKD4, G3T3U6, A0A034WIW1, G1NKA7, F7HFW2, Q5E9S3, R4GLC9, F7IM24, A0A0D9RVX4, F1S3R2, H9GGA5, K7F6Z1, B5XB80, H3A7N3, H0XT42, G3VQW9, O43680, D3PI09, H2QTS0, A0A0C9QI33, B5X3M2, F7F0J1, H0ZMT1, G1PD53, I3NFZ6, M3YTM9, C1BUM2, M3X4M8, G3QRT2, A0A096NDT5, G1TED4	Transcription factor 21	InterPro
NKX2-3	-81.58	UniProtKB	G1LL28, W5PSG3, H2Q2E5, F7GBU1, Q8TAU0, A0A0D9R089, A0A096P651, H0W9Z5, A0A087WVU3, Q3ZC90, H3AZ48, G3S329, G1PKH6, G3Q3B7, H0VFD3, H0X8Y4, H0ZGI5, F7HW97, G3RCN6, H3DI63, A0A087X4E8, G1RWX2, H2NB94, I3MFH6, F7HMD3, F6T7R2, M4A741, M3YZX6, W5LGN3, G3TDM6, U3K0N6, F7D501, G3WJR7, M3X3F7, F1S8W5, G1LL30, F1PL08, G1KC47	Homeobox protein Nkx-2.3	InterPro
TLX1	-74.68	UniProtKB	U3K1X9, A0A096P6B4, H2Q2G2, F6VXW7, E1BNZ8, U3JL24, H2NBC8, G1U369, G3WJ06, P31314, M3YZR2, H9GH92, H3ABP3, V8PF47, M3W718, A0A0A9YCS1, F7EGZ4, F7EUI1, A0A0C9RAQ7, F1NNC8, F6WYJ3, W5Q4C2, G3RP14, W5UEX8, G1RXR8, L0BW50, F7FXZ8, G1NCR9, E2RHD0, G3STS5, G3S1Q9, F7FXX6, H0X9G2, A0A0D9QZQ6, F1S8U3, G3QSV6, I3MZ31, H0V0A6, G1MGW2, G3UB59, F6UH27, O93366, G1PNI0, U3IB41, F6ZVF0, F7C6Q7, H0ZID2, G1T4S9	Uncharacterized protein	Ensembl
LOC102147174	-62.38
CAMK2N1	-60.12	UniProtKB	G3QUX8, A7MBG3, A0A0D9S8C6, H2N8R5, I3LQ15, M4AWR5, H3BGJ7, H2PY84, A0A096MZI8, F7GNI1, W5QBD6, G1L953, Q7L2B8, I3N646, H0XUK5, F7HAQ0, G3NY84, Q7Z7J9, G3T1S0, H0W4S0	Uncharacterized protein	InterPro
PF4	-59.52	UniProtKB	P02776, H2PDK9, P02777, A0A0B8RZA5, W5PZF0, F6WJ19, G3RHN6, F1MD83, G1R8X7, A0A096N568, A6QPP9, K7CRP5, F1SGI0, F6RMK1, F6SCN9, H2QPN6, P30034, P30035, A0A0D9QXK3, P83470	C-X-C motif chemokine	UniProt
HBB	-59.12	UniProtKB	C7ELS8, C7EM49, C7ELS9, B9EMX5, Q4TZM4, B5XD42, T1WIZ6, A0A0A7RVQ0, C7EM50, B9VYE4, Q4TWB7, C7EM56, C7EM55, C7EM58, C7EM57, C7EM52, C7ELT2, C7EM51, Q8IZI0, C7ELT4, A0A0C5PWK4, A0A0C5PWK7, P07036, P11756, C7EM59, P11758, S6B9T0, P11752, F8W6P5, P11754, A0A0C5PS53, C7EM61, C7EM60, C7EM69, C7EM68, Q10733, C7EM67, C7ELU6, A0A0A7RVP7, C7EM66, C7EM65, C7EM64, C7EM63, C7EM62, A0A0A7RVP3, P07415, P86919,…	Beta-globin subunit	UniProt
LOC102130448	-57
MEST	-52.25	UniProtKB	K7GBV2, F6SAL3, W5P693, H9G6G2, C9JCM6, A4D1L9, U3JRD9, H0YUI9, E9KKB5, Q2HJM9, U3IIN6, C9JWU9, G3W0A9, G1PSC6, A0A024R768, F6YR99, H0YUJ1, C9JSW2, G1MW77, K7EV73, F1NDD3, F6WKB2, I3N3M5, B7S817, C9JW74, U6DXN9, F6ZB99, E2RKF4, F7F6P7, C9JRA9, M3X3M5, M3Y145, G3QE93, Q9I8E7, F6Q8M8, A0A0D9RBG2, Q5EB52, F1MZU5, W5UJH4, H2QVE0, G1LGE4, A0A096NER4, H3B8D3, G1SRM7, H2PNI9, B2KL28, H0X049, H0V3N4, G1R…	Mesoderm specific transcript homolog (Mouse), isoform CRA_b	InterPro
LOC102136192	-48.5
NR5A1	-45.69	UniProtKB	V8NC14, A0A0E3VN03, Q04752, H9GF44, G1S650, A0A0D9RM81, F1D8R8, F7C763, F7AWP9, H0Z9Z1, E1BXV1, Q13285, F6RLS9, W5PVB0, H0VUN0, F6WNR0, I3LWJ5, P79387, G1P5I6, G3TL19, A0A096P0M0, U3JHG0, B6ZGU8, G1LXI2, G3WVV2, Q95L87, H2PTD0, Q5T6F7, Q5T6F6, U3IA02, R4GCA2, I0FGU0, G3WVV3, H0Z9Z3, G1STY1, F1DAM0, G1N8D4, Q9GKL2, G1N8B0, M3YRA9, K7FF69, F1SKS5, M3WZ16, H0XGM8, G3R0U5, F6ZY85, F7GT76	Uncharacterized protein	Ensembl
NEFH	-45.49	UniProtKB	A0A0D9RBE3, U3JX85, G1QRR1, U3JX84, H0VBE8, J9P010, G3RQ98, F7DKT3, M3YPP0, M3ZZ77, F1PNP2, H0X6A7, F1PZZ3, F7G5S6, W5P2D4, A0A096NJD8, G3TNP9, U3IDH8, G3R8H2, H0ZJK2, I3N658, F1MSQ6, H2LWQ8, H9FI62, G1SL24, W5MP88, H9GES7, H2P3Z5, H2TYX3, A0A087YF46, H2QLG1, H2TYX6, F7GL79, H2ZU68, H2TYW9, F6UXS8, H2TYX0, T2MH06, G1LNL0, F1ND22, W5MP77, H0W8Q3, F1RFH3, G1PJV6, G1NC18, J9P515, H3DD69, I3K7T8, G3V…	Uncharacterized protein	InterPro
PTPRH	-42.8	UniProtKB	M3Y8G3, F6XRK6, F7GW43, F1PPP2, H9H6U4, H2P067, F1MGT8, H0VWN0, G3SSF8, W5NUF7, F7H5U2, V8NXL6, M3W4F4, K7FYM8, I3LFV7, G1MR48, G1RIY8, J9P2Q4, Q9HD43, K7FYM1, F7GW91, G3R107, A0A0D9S5Y7, I3LFJ4, I3N386, H2QH54, G1LA25, A0A0A0MVE6, H9H8L0, H0XEY6, J9NW78	Protein-tyrosine-phosphatase	UniProt
LOC102117768	-38.71
CHRM4	-38	UniProtKB	B3TMC7, H9FJS2, B3TMC8, B3TMC5, Q65YZ2, M3Z410, B3TMC6, B3TMC3, B3TMC4, H0ZK47, B3TMC2, H0XRZ0, Q96RG8, F1PVZ1, M3XFA6, F1NVL7, G1MP15, P08173, D2KAN4, D2KAN3, G1NRP3, W5PM76, F1SIA0, K7EUB1, G1QAR6, U3KIG6, H2RG80, G3WSR7, H9F7P9, P41986, B3TME3, B3TME4, D2KAL8, G3SFP9, I3NGB6, U3I112, H0WAC4, B3TME1, B3TME2, B3TME0, G3UHX9, A0A096MVQ1, H0W8C5, P17200, D2KAL6, B3TMD3, B3TMD4, B3TMD5, B3TMD6, O88…	Muscarinic acetylcholine receptor	UniProt
SYT8	-37.5	UniProtKB	I3LBJ6, H0XKT0, K7G5W5, H3A8M5, H2R5N4, F1PEC0, G3T9F4, G3QZC5, A0A0D9RBX7, G1RSF7, H2NCE9, G1KIZ9, M3X6S3, G1N8E9, A9L950, I3NHL8, F6QJ18, F8WBL4, H0ZGI9, A6NCR4, A0A096N7K3, C9K032, C9J253, G1L5J5, H0Y3G9, U3KB14, F1MRS2, U3IUD3, F7AUA3, M3Y3Y1, F7AUE6, H9GZZ2, W5P163, F7AUC4, G3VJN9, Q8NBV8	Uncharacterized protein	Ensembl
LOC102120240	-33.87
ESM1	-27.03	UniProtKB	G1MXY1, V9XZL8, H2QQW3, D2HXE3, E2RJ30, W5PDW1, I3MXC4, F6TJM1, H2PFJ8, F7EV13, V9XU60, G3QZZ2, H0YW47, V9XWZ5, H0VBH2, Q9LJG3, H3A5C7, A5D7V3, V8PE21, A0A096N6E6, K7FMY9, M0R154, F7HXB8, A0A024QZR4, R4GLH0, A0A0D9RVM3, V9XXX7, V9XWZ9, M3X172, H2R5K2, H0Y010, G1T1L2, F7HUC0, G1KR58, G1QG59, Q9NQ30, C1JFI3, G3TH76, F6RBB9, U3IAH0, M3YS96, C1BM60, U3K8C2, F6RH45, G1QKA5, U6DUD2	Endothelial cell-specific molecule 1, isoform CRA_a	InterPro
LOC102118470	-26.29
LOC102141168	-25.36
PTGER1	-25.13	UniProtKB	G1RT13, H3B8V8, F7HTH9, P34995, Q05C32, G1M4C2, G3S6M0, W5P6N7, A0A0D9R1Y9, Q9BGL8, F6PNQ3, M3XV78, A0A0A0MWU2, H2NXT3, H0WB73, G3U402, K7FIM3, F1SCF7, F1MUY4, G1PBB3, G3VPS1, F7AMB9, G1KTE4, F1PIW8, I3MLP0, F7HWH5, H0XMM4	Uncharacterized protein	UniProt
NTN4	-24.82	UniProtKB	W5PQH3, F7G5T9, U3K8A7, K7GEA3, G1R1I9, G1KPH5, U3I962, W5KJ84, M3WUD5, U3CUZ3, V8P047, Q5RB89, F7A3Z5, F6UDK1, G1N6T5, M3Y732, F6U954, H9F758, A0A0D9S0Q6, G1NUB0, H2ZT46, H2ZT45, H0ZDS4, H2ZT44, H2Q6M9, E2QZY0, F1P4C0, A0A096MYW4, G1T9Y0, G1L5X5, W5NFH4, F6Q5V3, W5NFH3, E6ZFV1, G3STN6, K7DDL0, H0VPT2, G1NG05, A7MB18, F1SQR3, F6UDI0, H0XAZ2, I3M159, K7C5Y1, F6UE31, Q30DQ8, G3RCW3, G3WB58, F7A403,…	Uncharacterized protein	UniProt
LOC102144743	-23.86
CD5L	-22.77	UniProtKB	G3U572, W5PAL4, F7FUB7, A0A096NR27, W8VYQ1, A0A0C9QHQ1, F1PAX5, F1N514, O43866, U3J4U7, H2N5A1, F7HDX2, F1RN76, G3SQJ5, G3VVS4, A6QNW7, G3R058, W5LVZ1, I3KMM0, F7C178, M3WCL4, F1PG16, H0UZM6, G1TN00, G1LCQ8, M3YMP9, F7BXD8, G3Q5G5, G1RRC5, M3ZPZ7, H9GV18, U3J4V0, A0A0D9S480, H2Q0B2, H0WRR4	Uncharacterized protein	InterPro
TCF23	-22.56	UniProtKB	G1NVI1, G1L4V9, H2P6P8, F1N1L0, F6WG10, Q2T9Q7, H2QHL7, Q7RTU1, G3WGP3, I3MPV8, M3WXW6, A0A096NQI9, F6UX89, G3TDI0, F7I080, H3B3E0, F1SED6, G1SVL3, W5QCZ3, G3QJH4, F7BSB6, A0A0D9RB88, F7C240, H0V1P0, H0WUD9, G1QRT2, J9NXT0	Uncharacterized protein	InterPro
SYT15	-22.41	UniProtKB	F7E9P8, F6YNT1, F6Y9Z0, H0Z5X5, H3BLX3, F6YPF0, F6YNT9, M3VUI3, F6YAN6, X6R8R1, E1BCH0, F1Q2M2, Q9BQS2, J9NUC3, H2R7Q4, G3W338, I3L7L9, D6RF99, F7CEC4, F1P2U3, F7EXZ9, J9PBJ7	Synaptotagmin-15	GO_Central
ITLN1	-22.21	UniProtKB	A0A096N291, G3QK40, H2N533, Q8WWA0, F7AB32, H2Q0F2, G1RU98, F6X1J9	Uncharacterized protein	Ensembl
SFRP2	-22.12	UniProtKB	F6XXR7, Q96HF1, Q3SX29, F7E410, F1PAV2, F7C8E8, G7MS58, C7AFG0, G1MRC5, U3KF56, K7EXL3, G3QH51, M3Y2A0, H0Z445, F1P5J1, A0A0D9S1M8, A0A096MRM0, G1R239, U6DPU1, Q9IA96, M3WQS0, I3M081, G1TC40, F1RX31, H0VKZ7, U3I5V6, V8N1E6, G3U159, H3ACD0, G1MJH2, H2QQB0, H0X642, F7GHD3, G1KRK6, F7CJ24, V8N8U1, H2PEJ6, Q863H1, C5IWT3, G3VWI0, G1PLE2, F6Q2D0	Uncharacterized protein	Ensembl
WNT5A	-21.42	UniProtKB	R0L7T2, G1KTY0, G1LYN1, M3YZH4, J9P5H0, P41221, F7EUL6, F6R3A1, K7EUC1, G3SQZ0, G3W1B4, H2PAG8, H0W0S9, F6PMQ6, P28109, P28128, K7F6A8, F6Q9G1, A0A087WUN1, H3AAC4, G1SD64, H2QMT4, T2MGE6, E1BDG5, A0A0D9RKB7, A0A096MZ93, G3QWY6, C9J8I8, G1PJZ1, Q27Q52, I3L959, O13267, G1N306, H9FC20, F7I9E2, F7I9H1, U6DRK0, U3K1J6, M3WL56, Q9YGX6, H0Z9G4, A0A024R316, W5Q1D2, I3N8I5, A0FKN4, Q6DK41, G1R6K6, H0WWV7	Protein Wnt	InterPro
LOC101867418	-21.36
F2RL2	-20.85	UniProtKB	U3I9S3, U3K614, M3W049, G1P7Q9, E2RKH5, F6W1N0, F6U5U6, G1L4T5, G3R7Z6, A0A0D9RS56, H0Z0Y8, K7EYS2, H2PFW9, H3AHL7, H2QR40, A0A096NP45, F1S2H6, W5Q630, F1P2V3, Q4VBN6, M3Y2K3, F6Q506, G3UHW5, H0Y1E8, G1NS12, F7G3G1, G3VJE3, Q58D85, A4IFB7, H0UZE3, G1U4T0, G1KHL7, V8P129, O00254, F7BIC5, G1RPZ9, H3D7I8	Uncharacterized protein	UniProt
GIPC2	-20.09	UniProtKB	Q8TF65, W5PV70, F7HB77, H0WVX4, H9H7M9, K7G4I3, F7CET3, G3VWE1, G3QQL5, M3YH96, G3UJF6, F6S8C6, H2N6Z2, R0KDP1, G1NAX2, H0Z8X0, G1LLM8, U3JTC0, Q1JQD4, I3MMQ5, J9NTP5, G1TCB1, K7EDC4, M3WR30, H0UUX7, I3L6T0, H2PZA0, F1NKY8, G1PBV4, H9GBJ0, A0A096N519, G1RFE4	Uncharacterized protein	Ensembl
DHCR24	-20.07	UniProtKB	R0LFS2, F6VE24, F1PXA2, H2N799, M3W1C7, G3SV13, A0A0D9S765, U3ECR8, I3M3I8, F7ECX2, W5PC78, H0ZGS7, G1NFY0, F6XB98, H3ACL2, D2H2H4, A0A0F8B1V4, G3VNS8, M3Y6T6, F6XPT3, G1SNE3, U3KCC1, G3R5L2, G1PVN4, F6Q3U8, F6ZHE7, I3LM80, H0VTT7, G1RWV5, Q60HC5, K7F6B9, A6QR14, W5PC80, Q15392, G1K8B5, H0WM79, A0A096N8C7, H2PZ41, Q5ZIF2, H7C4B7	Uncharacterized protein	Ensembl
MGARP	-19.97	UniProtKB	H2PEC1, H0W2Z6, F6Z4A2, G1RV05, F6YFB0, A0A096MQM9, F6UJ52, A6QLZ1, F7I7J4, Q8TDB4, G1LX03, W5PWR9, G1KYU2, G1PCV0, M3WIN6, H0WJV0, F7CVL3, M3YXG5, I3NAZ6, G1TLI7, E2QUD2, K7FYC3, H2RDV6, G3VWU0	Uncharacterized protein	Ensembl
F2R	-19.44	UniProtKB	H2QR41, G1KH92, G3UTK8, A7YY44, F7DGR5, G1RQ03, A0A0D9RS52, Q1HTS4, F1PTF6, F7BHX0, F6WW26, H9F7Q1, F7B1B1, U3HZM6, I3MB99, H2PFX0, P56488, M3Y2G5, G3ULU2, G3W5A0, A0A096MVQ4, F1S2H5, M3W050, H3AMI1, G3W599, M3XJA8, H3AMI2, G1QDT4, K7G3B4, H0VZV0, F7B181, A7UGA9, G3R4I1, F1NM53, D2HTE6, F7B186, G1TTP8, U3F3M5, Q00991, A0A024RAP7, W5Q651, P25116, G3SSZ6, U3K607, H0XPZ0, F1N4J9	Coagulation factor II (Thrombin) receptor, isoform CRA_a	Ensembl
LOC102143263	-18.85
PF4V1	-18.48	UniProtKB	P10720, G3SA05, H2PDK7, K7DK48, G1R8X3, H2QPN4, A0A0D9QXL6, K7CRX7, K7AV54, F7BNX5, A0A096NUB2	C-X-C motif chemokine	UniProt
LOC102127543	-18.12
YES1	-17.55	UniProtKB	G1R586, G3S8M9, V8NV82, Q28923, J3QRU1, G1Q254, H0ZIS1, F6ZR07, E6ZJ40, P09324, G1LJ17, F6YPC4, A0A0D9RYF4, G3QEE8, W5KIN8, G1KI30, H0WMN4, U3JUR6, P07947, H2NVZ4, M3WB17, F7G374, G1NBR9, V8PBH1, F7E686, H9EM44, K7FJ21, G3SQD0, H0VTP1, F6VI70, H2QE70, H3B9Z2, M3Y204, W5PIG2, R0LSP4, G1SPV2, A7MB57, A0A096MYI8, F1PSB7	Non-specific protein-tyrosine kinase	UniProt
LOC102136846	-17.23
LOC102125504	-17.15
TUBB4A	-17.01	UniProtKB	P04350, M0R278, H2RH67, F7BHV8, M3Y6F2, F7BS59, M0R042, H2QF52, M3WCZ3, W5P669, M0QY85, F2Z5K5, I3NB70, M0R2T4, M0R1I1, M0QZL7, G3S631, M0R0X0, Q3ZBU7, M0QX14, M0R2D3, G1PSQ1, F7BS92, M0QY37, H0XHY1, G1U410, A0A0D9RB46, G1S1J7, F7CLP1, M0QYM7, Q4R4X8, E2RFV2, G3WEK2, H0V0E4, A0A0A0MW99	Uncharacterized protein	UniProt
SHISA2	-16.95	UniProtKB	Q6UWI4, A6QPA0	Protein shisa-2 homolog	UniProt
LOC102132436	-16.83
LOC102147124	-16.79
BAMBI	-16.39	UniProtKB	Q1RMX1, A0A0D9RH13, G1N462, Q13145, G1NVI2, G3UHK7, U3JXE5, H9FSJ4, H0V4E4, M3XCD4, D2HNB8, F1SE52, H0WLL8, G3QPL0, H0YS32, F7CL00, E1AWU3, I3MNW3, G1S5A1, G1SSZ3, M3YUF0, E6ZI59, J9NW61, U3BGD6, R0LWL3, F7GN88, W5UER4, F6ZWJ7, A0A096P3X5, F6X7H5, H3ADZ9, K7GI02, K7AAP2, F6QKK9, G1KGS2, Q8HYZ0, G1S599, H2Q1S3, W5Q0Q0, H2NA28	BMP and activin membrane-bound inhibitor homolog	Ensembl
TNNI2	-16.35	UniProtKB	W5P118, U6DSG0, U3KB01, A5PJM2, G1RSH3, E1BUD3, P48788, W5UJY9, A0A087WXS0, B5X7I3, F6S3E3, C3KHH4, C3KIZ7, B5X8E3, U3BNH1, Q4JH15, C1FXZ2, G5E5D2, E3TCN6, H2R3X2, P68247, H0XXX8, P68246, B7NZU2, A0A0D9RBX1, M3Y3U4, B9EPP6, B9EN78, P02643, B9EQ14, F6X0S6, H0VCU7, A0A024RCB0, G3RW56, F6QJ10, B0VXL2, B2KIN5, U3IUV2, G1L5K1, G1KJ26, I3MAH9, B1MTZ3, F1PBZ9, A9L951, K7G5E5, W8G3C9, U3D3U8, G3VKK1, W5U…	Troponin I type 2 (Skeletal, fast), isoform CRA_a	InterPro
LOC101926565	-16.29
LOC102146144	-16.2
LOC102141707	-16.02
CCDC154	-15.95	UniProtKB	A6NI56	Coiled-coil domain-containing protein 154	UniProt
LAIR2	-15.64	UniProtKB	Q6ISS4	Leukocyte-associated immunoglobulin-like receptor 2	IntAct
LOC102140945	-15.4
SUSD2	-15.15	UniProtKB	H2P520, G3VKD4, G1N5W6, U6DCK7, Q0V7N1, F7EN39, H3B8I0, K7C876, H3B8I1, M3WBD8, H0VMC5, H3CUJ5, M3XUY5, G3PXQ4, H0XX87, E1C3A8, U3K0S9, G3T6I8, I3LDP5, E2RSH4, U3ITQ4, Q9UGT4, H2U2X2, K7AW18, H2U2X3, H2U2X4, T2M396, F1MSE7, G1ST60, H0ZCB2, A0A0D9REQ9, W5K2N7, H2R720, J9NZP4, F6QE14, A0A096NTS4, A0A096NTS5, H9H481, G1M5I0, I3MI31, W5M5J3, G3QHN9, S4RVL9	Uncharacterized protein	InterPro
LOC102145030	-14.51
LOC102141388	-14.22
GDPD2	-13.75	UniProtKB	I2CU42, G1MU66, H2PVX6, W5NDJ8, F7C2C4, G3T6X2, A8IS69, Q9FLM1, W5Q275, F1PD96, F6SE50, F6VMW5, Q9HCC8, G3VM54, W5JXY4, G3VM55, G1TD30, F1RTL2, K7GMV1, K7GPH4, U3IXN6, U3BDX8, G3QH93, F6UVY7, M3W9X9, A0A0D9RGS4, G3TUE3, K7GLR8, M4AFP5, I3M4B0, Q3SZL1, U3KC25, G3S187, H0ZAR5, F6VMR7, F6SE71, H0X5K9, G3PYE4, A0A096MYH4, K7GQU0, F6UF92, H2QYR7, A0A087XZW2, H3DHE8, E1C392, G1QJL8, H3B8D2, H9FW77, K7G…	Uncharacterized protein	InterPro
LIMCH1	-13.7	UniProtKB	F1NIU4, M3W7R0, G3QMI3, U3F1S4, E7EPK0, F7HJG7, U3IIS4, F7FZI8, U3D0K6, F6YGL2, F7FZE3, G1M370, G3TT20, V8NIT1, F7AG66, H2R3J9, H0WNC3, H0ZE75, G3T2J5, A0A096MTU8, G3S3D9, E1BC91, G3S6F2, G1T9Q0, F7GS20, F7A1R8, U3IBI7, F7GRY0, F7FZF5, A0A0D9RWY7, U3DS21, K7FAE8, F7HP10, G1NHX0, H0Y8P3, F6Z3I4, D6RD46, E9PDJ9, F1PHJ3, I0FQ40, F1PHJ6, I2CTG1, G3TW41, U3DR65, H2PD66, G5EA03, F7CPN4, I2CTY2, G1S5Y6,…	Uncharacterized protein	InterPro
NPY1R	-13.07	UniProtKB	H2PEN1, D2HXK2, D6R9D0, G1P047, Q9WVD0, A0A0B2V1F2, W5PW25, D6REY0, A0A0B2V4G3, U3K9A1, A0A0B2VSX4, O02835, H0W4G8, F7CP52, Q9GK75, O02813, G1R3U0, F6X0J6, G1KDK6, G1MTE8, M3XS08, G3VS95, Q1RMU8, G3QP89, Q8QFM1, H0Z5W9, H0WPU9, F7I5Y1, F6YEY5, B4DKL9, A0A0D9S1V8, M3W4X9, H2QQD5, I3M994, H0VW56, P25929, G3SP89, V8NU35, H3AMU9, A0A0A9Z7M1, Q28602, H3AMU8, V8N677, A0A096N011, K7FH11, R0K1M3, U6DZ50,…	Uncharacterized protein	Ensembl
LOC102145908	-12.97
PCDH17	-12.97	UniProtKB	H0XNS1, F7F2V1, V8NEJ8, G3RCZ1, G3UAN1, G1SNH6, M3XGB7, H9F0I2, H0ZQD2, E1BAU4, F7FR90, G1P542, H2RA33, A0A087X099, F7HEY4, F7CV75, G1MIH5, E2RL47, G1S115, M3XP73, W5P9B5, K7ESR2, K7FJK6, F1RJ66, O14917, U3J311, G3WVK8, G3WVK9, H9F996, C4MH80, U3JZW0, G1K8J5, F7A6C3, H2ZXD9, I3NFN1, F1NXI0, A0A087WXV2, G3SQC3, F6XGK9, A0A0D9RYI0, A0A096N7N0, M3X6X9, G1NQ09, H0VSQ7	Protocadherin-17	InterPro
CSTL1	-12.93	UniProtKB	F7DEZ8, J9P3G3, G1RLJ0, F1SAT3, F6YYA6, W5P6J7, Q9H114, G3T1G5, F6ZI64, G3RBJ2, F1MS83, A0A087WTC5, G3W124, I3N9M5, G1U7P2, G1NXC4, H0VD04, A0A096NVS7, F6YYB3, H2QK29, H2P173, H0WR56	Cystatin-like 1	InterPro
IFITM10	-12.87	UniProtKB	G3N2K1, A0A096N0R7, K7G8P6, I1ZHT2, U3KB40, A0A0D9RC05, H2NCE7, M3W8G2, F6ZB47, H0ZGM3, G1L5D6, F6ZB68, M3Y3X6, E2RG63, G3RA73, F6Y786, F1NBE8, U3IR14, J9P3H0, G1KIR8, A0A0C4K5J3, H0W208, H0XV41, G3VDK3, I3MZN9, W5P4I7, A6NMD0, G1N8P3, G1RS95, H9H7A9	Uncharacterized protein	InterPro
THEM6	-12.71	UniProtKB	Q8WUY1, A6H707	Protein THEM6	UniProt
VNN1	-12.69	UniProtKB	F1PAX0, G1SGU0, S4R5T7, A0A096N5B0, G1RWW1, F6WUX9, F6RTB1, H0VKP5, F7C4P9, G1P5K4, M3YTJ4, U6CV45, O95497, H2QTR5, W5PYG2, E2QYS4, M3VWI5, F1S3Q7, G3VZT4, H2PKC9, G3QP21, Q9BDJ5, Q9TSX8, A0A0D9RVU7, F6QHW1, I3M9I2, F1P4I7, U3KBD3, F6Z129, Q58CQ9, G1LVS8	Uncharacterized protein	Ensembl
SDPR	-12.52	UniProtKB	W5PXP2, A0A096NZ78, O95810, J9NW35, H0VIZ1, H9F2K5, R4GFH1, G1PT38, I3N6F1, G3X1Y8, H2P859, I3LDR9, H0XIN1, F7G2V5, H2QJ62, G1TEA3, F6WDJ5, G3UC93, M3XCQ8, G1R4X4, F7F4U8, G3QGZ7, M3YMS7, R0JE41, D2H886, Q17QZ6, F7BLE8	Uncharacterized protein	Ensembl
STAR	-12.52	UniProtKB	G1LXA7, A0A096ZSQ3, H9G3T0, A5LGG2, Q6IBK0, G1TL73, Q3LR71, G3SPT3, H3ALG4, O46689, U3J603, F1PZH0, P79245, A0A096N0P1, E5RH12, H2QW13, H0Z2Y1, H0V0L9, V8P273, I0FIM1, F7ALD0, H2PQ29, Q28996, G1MTF0, C1C4A2, F6Q5N5, H0YB94, P70114, P49675, G1RNP1, W5NT25, M3YES1, F5CT15, Q28918, G3QSM4, B7X6D6, Q5Q0U1, E6ZHI2, G1SHQ4, K7G223, Q9DG09, F7GCG0, A0A0D9RSI7, G3WXW3, G1P0U3, F7FWU0, E3TEL6, H0XCP2, U3J…	Uncharacterized protein	InterPro
GOLM1	-12.39	UniProtKB	U3JLQ6, E1BLA8, G3T950, F7ATS5, G1SGL2, G3W1F4, H0V1S6, G1LBT0, H2QXE7, U3J862, E2RLA5, H2PSJ9, C6H109, Q8NBJ4, H0YXU7, M3WCA0, G1P668, M3XSW4, G1K8H1, E1C3N9, A0A096P1W7, H0WMS3, K7F6X6, F7ELM3, G1QUE7, G3R9T4, W5PG72	Uncharacterized protein	Ensembl
LOC102115168	-12.36
CAV2	-12.27	UniProtKB	Q108U8, Q2QLG7, Q2QL80, B9A0U9, P51636, Q07DW0, B5XGJ9, Q00PK0, A8JF90, Q2QLC2, Q2IBA4, C1FFJ7, Q09YN7, U3K6A0, I3NDE2, O46550, U6CRD4, A0M8S6, G8GCE6, Q09YJ1, Q4RS85, B9EQC8, Q2IBD6, U3IX33, Q2QLF3, G1KFI5, F1P026, Q2QL91, Q2QLB1, K7CPH1, G1T7J8, G1RLA2, E9PCT3, V8P8L9, Q53X57, A0M8T7, H0Z4B6, Q07E39, Q07DZ3, R1D8H0, F7C1W2, Q2IBC2, Q09YL4, K7BWC2, H0XQ31, Q09YH9, H3AWR5, Q2QLE2, A0A0D9REV3, F6W…	Caveolin	UniProt
TM4SF18	-12.22	UniProtKB	H9EZG4, H0WW97, G5EA70, E1C342, D2HWE7, G1NEU1, A0A0D9RGE8, G3SWM8, E2R4P4, F7GB75, U3IMD6, U3JRZ1, F1SKA9, H2PBQ2, F6T389, I0FP28, F7A0Q9, H0ZMF7, G1KGP2, K7GGC1, G1QRU7, Q96CE8, W5P4A7, M3XTN3, H2QNK0, V8NHE5, G5EA69, G1P250, U3BU09, I3NFA1, A0A096N3E4, G3QIU8, Q3T110, G1SJX6, F7I2B4, F1SKB0, H9F479, C9J6Q4, M3VWD3, H0VMS5	Uncharacterized protein	InterPro
LOC102116576	-12.14
SEMA3D	-12.01	UniProtKB	O95025, Q90663	Semaphorin-3D	UniProt
AFAP1L2	-11.92	UniProtKB	F7H7Q9, U3CDB2, F6YHP4, E1BUF6, U3JHS0, H0ZYY0, F6WT41, G3WK27, E6ZHA5, I2CXS1, H2NBN9, F1S5H2, G1T1U0, U3F370, H0WIG2, G3RHH4, M3XSB0, H9GFN2, U3DQ47, F7HCV7, I3N786, F7G7S1, G3RTR1, J9P0K4, G3SJ96, Q17R10, U3IX77, K7G4B2, F7DWC3, W5PZE9, F1Q0I9, G1NF13, A0A096NTS2, G1S2K0, A0A0D9QYA0, H2Q2L8, G1P9D3, H0V2L5, F6QUH3, Q8N4X5, M3XKT1, H3AZB3, G3SXF5, M3VV47, H0ZKY6, G1M9F5, G1M9F4	Uncharacterized protein	InterPro
LOC101866748	-11.86
NOS3	-11.75	UniProtKB	I3LXI7, R4GLL8, Q5XL26, H2PP16, F1PV06, Q9WTK6, F1PV05, H9GDL4, H9CZR1, H9CZR0, W5MAC4, D7RVB4, Q28969, G1PQK0, V8NCF8, H9CZR2, H0V302, F6S3S1, F1MY54, G3SZA3, W5NV95, G3RKZ4, A0A0A0MTA6, P79209, A0A0D9R373, H0WJA4, P97270, F1SSJ3, G1M5X2, H0V303, M3Y867, W5KCN3, G3W5B1, G3W5B2, M3WID9, H9CZP9, Q6R3Q2, H7C4V4, S4RVF6, H9H0V9, G3U1Q1, A0A096NXX3, H0W4I4, P29473, P29474, G1QV96, G3UF96, F6REQ2, H2Q…	Nitric oxide synthase	InterPro
LILRA3	-11.5	UniProtKB	Q8N6C8	Leukocyte immunoglobulin-like receptor subfamily A member 3	UniProt
LILRA5	-11.35	UniProtKB	A6NI73, G1R3B8, A0A096NXI0, H2P027, F6VQR7, H2QH39, G3RQU2	Uncharacterized protein	Ensembl
KAZALD1	-11.24	UniProtKB	M3YZR4, H2Q2G1, A0A096P6B2, W5Q485, H2NBC7, F6ZTQ7, G3WKG1, F1MKW1, H0XJL0, G1NCS4, G1PNH1, V8PH39, M3WN37, G3S137, F1NLB5, V8PH34, U3K1Y3, F6UH10, G1SIR9, F6WXT0, F7GA84, K7FN94, H0VSY9, I3MPF1, I3LUZ5, G1RXR2, G3STS2, J9P2F4, A0A0C9PWR9, G1MGV7, Q96I82, A0A0D9QZR1, G3QPD7, H9GH87, D2GXU3, H0ZID4, U3IB08, W5N0Y6, F6UH21, F7EGQ0, H3AMA6	Uncharacterized protein	InterPro
G0S2	-11.04	UniProtKB	R0LMX4, M3Z4U3, D9IU67, M3WLX2, G3N127, K7EZF8, H2Q121, H2N3U1, G3QK46, U3KJL5, P27469, F7GK66, G1KEP0, F6YH06, G1SKX3, F7HFB2, H0XTV9, I3N3K4, D2HIJ8, W5P2G6, A0A096NCL4, H0WAP9, G3WAI0, G1Q734	Uncharacterized protein	Ensembl
ADRA2B	-11	UniProtKB	G3X6S2, G7NAM7, G1Q5L4, O19091, O19014, O77721, H9G806, O19012, D2HV37, I3MV65, F7G5U3, O19054, O77723, P18089, F7BW54, G3VWZ4, F1Q1Q4, H2RHZ6, Q38PT0, M3X1F7, H0WAG2, H3AHI5, H0W807, O77715, U3JA22, O18935, O77713, F7EVN3, A2RUS0, G3RMW6, G3S902, A0A0D9SDJ5, F1NBV5, K7EZ17, Q60475, O19032, B3VE16, V8NNW4, O77700, H2P540, F7IPR3, G1TQL5, H0VX69, M3Z4L1, F7IPN4, A0A096MX90, Q2HQA3, O19025, O77830,…	Uncharacterized protein	Ensembl
PKDCC	-10.74	UniProtKB	U3IZV7, G1SIT7, U6DQL3, F1S4U8, W5NI93, H0VS76, H2QHT1, H0YYV0, F7GQT5, J9NXG6, F6VUE3, F7DV59, F1NEA9, F7CBQ3, M3VZS6, U3E4B9, W5L943, V8NNW1, H9F4Z0, G1NCB4, I3LVV1, G1LEY0, H0WMV2, G1S3U1, M3YBT2, F8WB71, E2QUX6, G1PG92, U3KDR0, W5U681, Q504Y2, H9FME7, G3RDU8, E1B9H4, W5PCQ6, H3B7Q7, G1KI67, G3WKS3, F6UB77, A0A096MVF2, H2P6E7, A0A0D9RJ71, G3TT31, K7FI30, H9FDT5	Uncharacterized protein	Ensembl
LOC101865625	-10.72
IGFBP2	-10.7	UniProtKB	F1P1I0, W5QDR1, G1NU18, F7I8D2, Q29400, F6V0T8, H9G986, P24853, F6YKM5, Q7T186, H3AJ40, G3R7T3, U3JMZ3, F1PEM7, G3UC06, U3DBP6, W5QDR0, H0Z3W6, U3IQK8, A0A096N042, E3W6T5, I3LQ27, Q90ZR1, H2P8J2, M3XHS2, P49705, C9E9W3, H9F8W4, A0A023JPV2, A0A096NYM0, C9JMY1, M3W285, A0A023JPV3, M3YYH6, F1N2P8, Q802T1, G1NGG4, I7J402, P18065, F7I8E0, A0A0D9R9L4, A0JGW5, Q3I344, F7I619, F6VEN8, K9MLZ7, H7C1H0, P13…	Insulin-like growth factor binding protein-2a	InterPro
HCAR3	-10.5	UniProtKB	W5P3D9, P49019, H2RAM9, G3N168, F6VN67	Uncharacterized protein	Ensembl
LOC102114965	-10.44
COLEC10	-10.25	UniProtKB	M3XJ46, H0ZQ23, A0A096NWC6, G3NU33, M3WK85, D2I4M6, A0A087XRJ2, G1U0D7, A0A024R9J3, G3SVM1, K7FV43, A0A0D9REN7, W5PIL7, F7CMY6, J9P064, G1NIR7, H2QWM4, W5KIN7, Q2LK95, H0UW55, H2PR29, W5MRT3, I3LZD1, F7HWP7, F7CHU9, G1QYB5, U3JI12, G1NZ08, F1N0Y5, G3QVW3, Q9Y6Z7, F6X2E0, G3WVQ2, H9GDX4, H0WJW6, A0A096LWR1, M4A5M0, V8P184, U3IQ55, M3XPM0	Collectin sub-family member 10 (C-type lectin), isoform CRA_a	Ensembl
PNMA3	-10.08	UniProtKB	I3MUC7, U3FWR7, G3SKM9, U6DU70, M3X6D0, H2RGY5, F7D2F3, F7FSJ4, G1S9L3, F7DX48, A0A0D9S9E0, H2PX42, A0A0A9XQD0, H0XSJ5, Q9UL41	Paraneoplastic antigen Ma3	InterPro
TMEM26	-10.07	UniProtKB	A0A0B2V7L9, T2MAF0, G7N2E7, V8N8W3, Q6ZUK4	Transmembrane protein 26	UniProt
PCDH12	-10.06	UniProtKB	A0A0D9RJ05, G1MR99, Q9NPG4, F1N0X0, G1RF07, G1LUP2, W5L6I8, K7FGK9, F6YSE3, W5NU41, F7GZ76, G3WHW4, A5D7V2, F6R9T2, F7H7B7, F1NI83, M3ZM14, H2M7J6, H3AUD1, H2QRP0, H2PGW8, F6RJQ5, I3N1N8, E2QX82, G1TCN8, G3SFU1, H0XZJ4, M3Y9A6, Q8IUP8, G3RB59, A0A096MSK1, Q7Z738, W5N063, H3D607, U3IIZ0, G3PVF4, U3JJX5, G1P025, G3TI68, M3WBD1, H0V684, A0A087XNJ1, F6ZMN0, F1RM49, W5NU38	Uncharacterized protein	InterPro
C7H14orf166B	-9.97
DSEL	-9.85	UniProtKB	Q8IZU8, G1NR42, F6PU15, H0XJW5, G3ULD9, M3WQG1, M3Z7C1, O49523, E6ZJ90, G3RQ58, F7BBJ3, U3HZX3, H2RB09, F6SII7, G3WKB9, G1QAY1, U3CFU9, U3KJJ8, F7CBZ1, W5NNQ1, F1ME12, K7F1L5, G1KMA8, H2NWJ1, G1U312, F1Q3P9, G1MLL3, F1NSV5, W5P4P7, H0WBA5	Dermatan-sulfate epimerase-like protein	InterPro
LOC102145010	-9.74
CAMK2A	-9.65	UniProtKB	A0A0D9RGP3, G1N4P5, G1RH50, D6RHX9, F7CER2, M3W0P7, U3J4U9, G3URZ9, L7MZY1, Q9UQM7, G3URH2, H2QRT0, Q7LDD5, G1TEL6, A0A096N2J8, F6TUX4, U3FCU4, A8E4M2, Q27I69, Q6S5C4, K7GAH2, H0YRM5, Q5RCC4, F6QSC1, U3FU39, H9EMI2, F7AK14, F6TVB2, H9EMI1, U3F557, F1P011, Q8IWE0, U3JZX5, A0A0A9YGW4, U3E1F8, G1LDX1, G3WYI8, H0V888, H3B5X6, A8K161, I3LSJ3, T2M388, M3YQY2, G3UHL1, G3QD05, I3MCL2, F1NGS8, F7H024, G5E…	Uncharacterized protein	Ensembl
POSTN	-9.52	UniProtKB	A0A024RDS2, G1KU83, F1RS37, G3WCH7, G1T1D7, F6Y012, H0UVP7, E2QYG1, H2Q7F8, U3IFM7, H2NJN7, G1QPI1, G3T4M0, W5PK02, I3LXC3, F6Y0G5, F1P4N9, Q2KJC7, F7DLB2, F7DLB8, G1NQ91, F6R2K3, F7DL99, F6ZVK0, M3YUB0, G3QUZ5, Q5EHP9, G5E6M0, F1N8W3, G1KZU2, G1NST3, K7F986, F6TB66, U3K0P5, B1ALD9, M3WP49, I3LDM1, A0A096NXU7, Q15063, E2QUG4, H0X8Z3, H0ZNX7	Periostin, osteoblast specific factor, isoform CRA_c	Ensembl
TSPAN12	-9.45	UniProtKB	H0VK53, G3SKI9, Q5ZIF5, A0A096MTW1, F1SJF5, G1RM84, H9FS76, H2PNB2, I3LW58, E2R1Q6, O95859, G3WFJ4, F7F891, C9IZ82, G3UFG5, K7FFX0, F7HZ66, C9J9U1, U3K5X0, H0Z2L6, F6WFC7, G3SUR2, G1N996, G1PGK2, A0A024R740, G1KG80, F6T296, F7FAL8, F7I7V6, W5Q9K2, Q29RH7, U3I493, M3Y6Q1, G1U4E2, Q5R8B5, G1LH97, H0WPF1, C9JQM0, M3WSE5, C9JC05, K7FFU8, H2QVA0, H3AYL4, A0A0D9REF6	Tetraspanin	Ensembl
EPHA7	-9.08	UniProtKB	V8PF82, U3JKV4, H9F0W4, H9FAC2, R0M1N5, W5PRL0, V8PEN2, G3TK41, X1WW11, F6XPG2, H0V191, T2MDF6, G3WUH1, H2PJU4, H0ZQ33, Q15375, F7D2V3, A0A096NGE6, U3DW98, G1NLJ3, M3YCD3, G1RSQ5, G1SDT6, G3QUG2, F1N780, D2HE60, U6DEA0, M3WPK6, F1RY15, E2R7J5, A0A0D9RXG4, G1P4L7, F7CWR4, G3TZE6, O42422, H2QTF1, F6Z105, H0WJP9, G1KC20	Receptor protein-tyrosine kinase	UniProt
KIAA0895L	-9.07	UniProtKB	Q810A5	Uncharacterized protein KIAA0895-like	MGI
FAM211A	-9.06
NES	-9.06	UniProtKB	W5P881, Q2YDX4, U3JKV6, F6YXF3, F1MQ21, Q4AC89, Q9Z1Q1, I3N3U3, G1RQD5, G3S250, G1RQD2, M3WV48, G3QNJ7, Q05BW3, A0A096NYU4, H9FES8, F7H323, J9NT35, F7H325, H0UWQ4, R4HEK6, F7H319, G3S965, U3JKV8, F1RHI6, M3XYB8, K7ET24, G1M8L8, F7ISM4, A8KC73, P48681, G1SFG7, G1PFQ8, H9F2I1, G3SZJ6, I3LNY6, H0XIE1, F7FVH6, K7CIK9, H2Q0A1, H2Q0A0, F6VA50, A5PKT9, J9PBJ9, F7ISP5, I3L8F7, D3DVC4, G3WSP0, H9EYC1, A0A…	Uncharacterized protein	Ensembl
FCN2	-9.05	UniProtKB	G3QPI5, A0A096NWI9, F1NFI9, A0A0B2VF38, H0YVN7, F7BQZ1, Q15485, F7EBH7, Q29041, G1RBS8, H2PUA3, H2QY50, Q5I2E5	Uncharacterized protein	Ensembl
CPA1	-8.97	UniProtKB	Q6FQ30, C9JUF9, A0A0D4FTS3, A0A0D4GBP4, A0A075I2C6, A0A0D4EWS0, Q8AXN4, A0A075I957, A0A0D4ELA6, A0A075HBM8, A0A0D4GT78, A0A075GJ70, G1SS65, A0A0D4GXH3, Q6C9Y4, A0A0D4GB45, C7GNV8, A0A075FQ26, A0A0D4HA77, A0A0D4HIE8, A0A075G0N1, A0A0D4FWE6, A8IVK4, I3MD78, F2R051, A0A0D4G3J8, G3QJ04, A0A0D4FCN9, A0A0D4E9W7, A0A0D4EFC2, A0A061R2G5, A0A075H156, A0A075FKM4, F6ZBQ8, A0A0D4HJS2, A0A075HII7, A0A075I9V1,…	Cpa1p	InterPro
CXCL1	-8.94	UniProtKB	P09340, P09341, F6VZ29, G3QLE9, O46678, H2PDK8, O55235, G1R8X4, Q0EAC3, F6VW91, F7A9K2, K7BMP3, H2QPN5, K7AR94, K7B1E1, K7C287	C-X-C motif chemokine	GO_Central
APOA1	-8.93	UniProtKB	G3QY98, P68292, D9HUM4, P68293, K7D1U8, B5SNQ3, C3PSW9, M3WPG6, U5YS24, U6DBU3, H0VVW3, A0A0B4J2H6, O42296, R4R4Q6, B2KIF8, P0DMA6, C3KJ42, P0DM92, P0DM91, F6TE34, P02648, I3M072, P15497, A0A024R3E3, P32918, F6Z2L5, A0A077H3P6, P02647, D9HUF2, D9HUC8, B5XBH3, G3WJB6, U3JSR9, D2HC77, A0A0D9QUG2, V6F9A2, P0DMB0, F7HUS6, B0KWR1, G1MVX1, P0DMA9, D9HUG4, P0DMA8, A0A0D9S398, G1R6X5, E3TCY1, U3I449, A0A…	Apolipoprotein A-I, isoform CRA_a	Ensembl
CCRL2	-8.7	UniProtKB	G1MMI7, W5PXR6, F6X8C8, H2R3S4, F7BZ03, B2R8C0, C9JP23, G3WDH9, H0XLK3, H0W188, C0KV08, A0A0D9SBR1, O00421, C0KV33, G1R888, F1PR42, Q0II78, Q75ZH0, C0KV32, C0KV30, F7H9F5, G3S314, F6W0B8, H2PAY2, G3QYF4, C0KUY4, C0KV19, C0KUY3, C0KUY1, C0KV26, U6DMN3, Q9XSD7, C0KV27, G3TYL8, F7HJV4, A0A0B8S0A8, M3WKT9, C0KV24, M3YV26, C0KV03, C0KV20, F7CAR6, C0KV02, C0KV05, A0A096MP33, G1U1Y6, C0KV07	Uncharacterized protein	UniProt
ACE	-8.67	UniProtKB	A0A034WLT8, W8AG00, V8NKA6, W8AH50, U3JPM3, M9PM20, A0A034VRE0, U5L0R1, Q1KSD9, A0A034VRR5, A0A061QGY9, U5L0A9, J3KTH9, U5L0A6, A0A0A1X184, A0A0D6QLX3, A0A034VB12, H9FE31, Q9MZ24, F6R5R2, Q3KRI5, W8BIA0, Q3KRI4, F1MQJ0, J3KS28, J7ILL4, K7GRU7, J3QRX8, J3KSQ5, U5L108, Q6Q4G4, U3J3Y1, H9F3E6, W8CCU3, H0YUR2, F1NYM0, F1RRW4, K7GND1, F1RRW5, F6ZSR4, H2QZH0, W5PTV7, H9FIC0, U5L195, G9HQL1, W8BW90, U5L…	Angiotensin-converting enzyme	UniProt
C1QTNF9	-8.62	UniProtKB	F1P175, F6TH48, G1T200, U3IX04, I0FRD9, F6Z6W6, F7G441, G1PIC2, Q0II24, G3W702, H3B002, M3WC79, P0C862, E6ZIR4, H2Q7A6, U3K212, E2RLK6, G1RSZ2, H0ZMH6	Uncharacterized protein	UniProt
LOC101926136	-8.62
ETS2	-8.6	UniProtKB	F7IST1, Q0PZN2, E2RL10, Q0PZN1, Q0PZN4, W5ULK2, A0A096NJ28, F6Q0F1, W5PYQ4, Q0PZN7, P10157, F6S588, F1SGV1, G1ME08, A1A4L6, I3N3E2, U3JR76, G1KIR7, H2R1W7, U6CZJ3, G1PDJ6, G3VY84, K7FL85, Q0PZM6, G7MMS3, Q0PZM7, A0A0B8RSY5, F7F311, K7FL75, Q68UR8, O62767, M3W7T0, Q0PZL2, Q0PZL8, H3AP74, Q0PZL7, G3SUB5, O46472, B5X2E9, P15036, G1QY25, F1MEX1, F6WHW5, H0WUH6, Q9N1W3, G1NNZ1, U3J623, A0A0C4DG47, G3R…	Uncharacterized protein	Ensembl
PTX3	-8.59	UniProtKB	G3T6R4, G1QDH8, G1KFQ5, H0WWH7, E2QZN8, W5NXM6, G1M4F4, G1QVJ1, G1NDX8, F6S4L0, G3X6Q8, G1SYN4, H0ZLV1, H2PBU3, G3X3A1, U3JQ89, F7E0T2, I3MTM3, F1SJM0, A0A096N0W7, G3RH48, M3W0E0, H0UTD1, F7I850, F6SLY7, Q0VCG9, R4GIZ2, H2QNM9, U3IA68, P26022, M3XUQ6, F6U8M6, K7FAC2	Uncharacterized protein	Ensembl
ANGPTL2	-8.55	UniProtKB	G3SMS6, M3YR01, F7GXP6, F6W8Z7, G1STK3, U3IX67, G1N967, K7FBB2, U3D4B8, F7D736, F1NE57, M3WA23, G3WLT6, B2Z4B0, H0WNX1, H2QXX0, H9G9E0, G1PV68, G1ME27, A0A096P212, F6RZ87, H2PTF4, F6TA67, I3MVH3, Q9UKU9, H0UYD6, W5PSI7, G3QT57, U3JHQ6, H0ZAU2, E2RB01, G1S6J9	Uncharacterized protein	Ensembl
LOC102137176	-8.29
THBS1	-8.25	UniProtKB	F7B411, F6WIY2, G1SKF1, H0ZN18, U3JS61, G1DFP3, G1PUK3, F1P0J8, F1SS26, K7GPP2, G1MFX8, I3LY85, M3YA63, G1MFY0, H9FLX4, H9FLX5, A0A0D9R4I4, A0A0B6XK25, Q28178, G3VTZ6, A0A096NTD7, H0WZD1, G1NHK4, A8MZG1, H2Q953, H2NMT2, V8NTV6, R4GCU7, W5QFP0, K7GPJ3, H0VRT7, M3WF45, G3RB36, P07996, F7IIH4, F1PBI6, G1QNM9, G3SQW2, A0A024R9Q1, U3I892, F6UFX5, F6WMA0, F6YR34, Q1RP81, K7FA03, K7FA05, H3BFP1, H0W0C7,…	Thrombospondin 1, isoform CRA_a	InterPro
LYVE1	-8.24	UniProtKB	M4A4D6, U3JE45, G3TC75, G1N2P7, G1P6G3, E2R6A0, G1KI55, G1L9W2, W5PN42, A0A0D9QX12, H2NE39, M3VUP6, F7AL98, K7G3U9, I3ML99, E1C9I1, F6S568, F7H6X6, H0ZCB4, F7EKS0, U6DMQ2, Q6UC88, Q9Y5Y7, H0WJA5, A0A096MN11, G1SXM9, G3SG32, M3XGZ3, H2Q366, G1S773, G3VKY3, G3VKY2, U3IAL1, F7AVS7, H0VAX7, I3LTD0, G9K938	Uncharacterized protein	Ensembl
LOC102146810	-8.21
SLAMF9	-8.19	UniProtKB	Q96A28, G3WB44, W5PE49, F1RJ79, A0A096NCZ5, G1M5V6, F6V178, A0A096MZ75, G1RSL8, K7GSI4, G1Q228, G1SHE0, M3W9S0, A6QPQ8, H0VBC0, H9F266, G1QA28, F7ISP4, E1BNF9, E2QZI4, A0A0D9S3U3, H2N560, G3TNB6, I3M9R8, H0X8I1, K7GML4, F6UAS7, F6RKE5, F6YVP9, K7E676, M3YP20, H2Q0D7, K7GSH8	Uncharacterized protein	InterPro
LOC102122889	-8.15
LOC102142134	-8.14
CDH11	-8.09	UniProtKB	V8N553, O93319, F6XVG8, W5NUS7, V8P6J1, K7GLK6, M3W046, G1TCU4, A2VDQ6, Q96CZ9, U3ESL0, C4MH71, A0A087X227, K7GSD1, U3J6B5, G3QKI4, G1PU94, G3TBS3, M3Y0L6, F1P6U6, G3W5M0, U3DH31, H2QB91, A0A0D9QXB9, F7HYU3, F7ICN8, A0A096NJ47, H9GM15, H3BUU9, H0ZHZ6, I3MI14, G1L3U5, P55287, H2NR34, F6UDX0, K7FY62, F7ICS4, H3BQH2, F7GFF0, G1N438, G1QUW8, F6YE92, F1P1Y0, F6RF11, U3JYU1, H0WJP8, F6TJ88, F1RFU7	Cadherin-11	InterPro
B3GNT7	-8.06	UniProtKB	F6SZF4, F7BLN9, K7F2X9, G3TAL0, M3WH50, G3R4F6, I3LW50, M3Z4D8, G1T1F2, Q8NFL0, A0A0D9R2W6, V8N7N8, I3LRI4, A0A096MWB0, T2M987, H0X6E7, F1NU54, F7HQE6, F7FBX1, W5QHQ3, H0ZHM0, W5UDB3, H2P8W0, F1Q1M4, A0A0B2VUA2, H3A8P2, U3KLK1, U3J0X1, U3BGJ3, H0UYC7, H9EXA6, H9G4G1, G1N7V1, F7F6F4, F1MG37	Uncharacterized protein	UniProt
P2RY6	-8.06	UniProtKB	F5GX90, A0A096NCQ0, F1MTB2, U3JZV5, G1S5L9, H2STN2, A0A096LPU5, F6X879, H2STN7, G3UCC5, F1PVK1, H2STN5, H2STN6, M3YEC7, G1MPP0, H2STN3, H2STN4, M3WSD3, G3W764, A0A024R5I9, Q15077, W5NN67, H2Q4D3, H0ZTD1, H2M3G0, T2MD45, H2M3G4, F7IT88, A0A087X7R3, F7A066, F5H7H9, G1PXZ2, I3JBX0, H9GG70, H9H277, H0W6Y3, M4AUH3, G3NZS3, U3I1A6, W5LUV5, G3S6B7, G1TDY2, F6YP13, F5GYF3, U6DI87, K7EXS5, I3MWL1, H2NEL2,…	Pyrimidinergic receptor P2Y, G-protein coupled, 6, isoform CRA_b	InterPro
LOC102145551	-8.01
C7H15orf59	-7.94
LOC102123842	-7.87
SLC40A1	-7.74	UniProtKB	U3IV51, G1M0K1, M3YLR4, E7ES28, G3RNH9, H3AYK4, E7EQF8, G1N357, G3T395, F6S3X1, T2M558, K7GB01, H0V3V9, F6YB06, A0A061R651, G3WCX4, F6Z4W3, F1NWJ7, E2RFJ3, G1SML8, F6S5T6, A0A096NY75, Q9NP59, U3EWC8, F7E2W0, F6XNS8, H2P840, U3JPC0, A0A0D9RIZ0, H2QJ48, H0X9S0, I3N4X6, F6VMI6, A0JNB7, G1PCQ4, M3W7S0, D7GLE3, A0A096N6Z2, G1R4B0, W5Q4F9, A0A061S0S6, H9GL46, H0ZKW1	Solute carrier family 40 (Iron-regulated transporter), member 1	InterPro
LOC101865384	-7.68
NR2F2	-7.61	UniProtKB	U3ISY5, A0A0D9RWN2, E2QW41, Q90733, G1PRD6, G3TD61, F6S476, H0VG21, G3RQX5, H0XPC9, H2UR41, H3AJZ6, K7DEU3, F7DY26, V8N3S6, Q801J3, F7IFE1, H0ZE46, G3QZY7, G1L2T7, H2NP93, K7GGD2, M3XBZ9, A0A096NNC2, F1D8R0, F7ICY3, Q9TTR7, H2QA47, H3BTC2, F6V347, U3BXL5, C5IWV0, F1PX81, I0FUM4, F7GRH7, K7GGB9, G1L9P5, G1RPA8, I3N8M4, G3WZD2, M3YGZ3, U3K704, A4IFS2, F6Y5T4, F7ICX7, T2MGI4, H2M2X6, F1SCJ6, G3RXP9,…	Uncharacterized protein	InterPro
LOC102132695	-7.56
FAM110B	-7.54	UniProtKB	Q2KJ38, H0VUU4, U3KK97, W5QG30, Q8TC76, G1QKX8, K7E6P1, U3IIY0, G1TMF0, H0XD05, A0A096N6K3, E1BF54, G3R998, G3VUS4, F6QGA6, F7FAR1, F1RT69, F6VR01, G3TY54, I3NEP6, E1C634, K7FH81, H0ZLI7, F7B486, G1Q245, Q5R5R3, F1PNV0, M3Z3T5, H2QW72, G1NRR2, G1KDW0, D2H960	Uncharacterized protein	Ensembl
TEK	-7.43	UniProtKB	H0XG18, K7GRP8, H2PS01, H9FLX0, G1L4T4, G3UEJ7, G1PDN9, F6UTL2, Q02763, F1NFQ9, G3RIN5, F6VW02, F6XN02, F1SP85, I3MFX6, A0A096P1E5, D9MND0, A0A096P1E6, H0YT27, K7GLN0, A0A0D9RBN2, D9MND2, B5A954, B5A953, U3IZL3, M3YWW8, H9EZ95, K7GQ34, G1KU09, G1TE63, H9FJG2, G1N963, H0VFN6, K7FZT0, Q06807, F6TEV1, F1P8U6, G3TXJ0, M3X412, Q0IIL9, W5PYW6, K7FZR6, G3T455, M3VZ78, G1S2P7, H3AN63, U3JY02, H2QX37, H9F…	Receptor protein-tyrosine kinase	UniProt
LEPREL1	-7.42	UniProtKB	A6QLY3, Q8IVL5, T2MAI5, Q6JHU7, I0FT21, H2QNY6, F1N912	LEPREL1 protein	InterPro
KCNH6	-7.39	UniProtKB	H0UWL9, F6Y052, F7IIG4, A0A096P6D6, F7CYR9, F6RFF7, E2RAQ7, G1KMX7, G1NEG9, G1TAD5, K7EED0, E1BMA2, G1LAK7, G3WC57, H2NUD8, I3L9R0, A0A0B2USL2, H0YUQ8, U3JPQ6, I3MDH8, F7CYQ6, G3RL09, F6RGB5, G1PKX8, V8NMJ6, F1NBY6, G1QWV3, G1QWV1, G3UTD8, U3J3A0, Q9H252, J9JID4, A0A0D9QV35, M3YU25, H2QDM7, G3RTP6, F7GZ63, F1RRW6, K7F9V1, J3KSC2, H0XJ41, F6ZE77, G3T553, A0A034WPF8, W5PUC8, M3WRT5	Potassium voltage-gated channel subfamily H member 6	InterPro
HOMER3	-7.28	UniProtKB	F7FF19, K7FMU4, I3MYA7, G3WC10, M0QYF9, W5PJN7, M0QZN1, F7AAG6, U3IKR9, F7FBG1, B2RA10, H0WY32, A0A0A0MU79, M0R2T8, G1MZE5, G3RT61, F1PEM6, F6VIN3, F1MW19, G1LYP9, H2QFU4, G3SRE3, M3YVL3, F1S8D2, E1C5K0, G1R2P9, G1PJZ5, U3K3R8, M0R2U7, H0V3F4, Q9NSC5, M3WC27, H0YS55, F7FF07	Uncharacterized protein	Ensembl
TMTC1	-7.17	UniProtKB	U3K325, M3YHT7, V8NED9, I3MQB7, V8NVC4, G1TRM6, A0A0D9R540, F6URY0, K7GGI6, G3R2V2, G1NKX2, G1LH87, G3SRM7, R0JH99, H2Q5N8, T2MAK2, F1NNA8, Q8IUR5, F6UAD1, A0A096MM84, H2NGW7, W5QE66, G1KN82, F1N5E9, F1PKF5, K7AL96, H0VS29, H0ZMG8, H9F6U4	Uncharacterized protein	InterPro
UACA	-7.17	UniProtKB	G1RTL1, H3CVZ1, I3N7V4, H0VBM3, Q9GL21, Q8HYY4, G1PFL9, G1T658, K7CTP5, A0A0D9RMI5, B7ZKM6, G3TRF7, F7EFH8, U3JRH9, W5N9I0, B7ZKM7, I2CXA3, W5QBM2, W5QBM6, H9GL32, F5H2B9, M3ZDU1, M3Z071, U3EA20, H0YNH8, H2Q9Q2, F7IFE4, G3RDH4, A0A096NMK4, H3BZM7, F6YJC7, M3VWI2, G1NDB5, U3I8N8, G3TC06, H0YMI1, T1W3N3, W5KFE5, H3DQV9, U3BEF3, F7I8C5, A0A096MH29, G1LQU2, G3PXJ8, A0A087XNT2, G3TRP2, F7ID14, U3C7I5,…	Uncharacterized protein	InterPro
LOC101866856	-6.98
LOX	-6.97	UniProtKB	G1SJG0, Q9ZU05, A0A096MYG8, V8NPL8, A0A0D9RQ69, M3YNL9, G3SA83, G1QBX5, F1RLC4, U3I7V3, A1X3N7, A1X3N5, A1X3N4, A1X3N3, V8N6I5, H0XW98, Q96PQ9, A1X3N1, A1X3N2, A8CYC9, F6W9F3, A1X3M9, K9MYT2, G3TEW9, H0WAI6, U3JYP9, H0YSC1, G3WTJ8, A0A089VSG8, G3RNM2, D8LBX4, G1MIA0, H3A4X7, D8LBX3, W5NQ71, K7FUR3, C3VHN9, A1X3R0, A1X3R2, B0FFI4, A1X3R1, A1X3R3, W5S2H1, A1X3R6, F2YL87, F7IP95, K7FUS0, E0AE00, A1X…	Lipoxygenase	UniProt
EXOC3L1	-6.93	UniProtKB	H0Z4R8, F6W2B4, F6UJW5, F7AI63, H0WFJ2, G1NUV9, H9G5N6, G3U0Q0, Q0VCR8, H2NR64, G3WCH9, F7AR70, G1QWJ2, F5H4W1, E1BUJ3, G1SYD8, D2H9D7, H3BPA4, G3R8C1, H3BRW6, G3WCI0, F1RFW4, H3BTH9, E2REY5, G3S825, M3Y2F7, F6UJX3, A0A096NJB7, U3JX77, U3ICP2, H0VHU0, A0A0D9QUX0, W5NXR3, F1MBI4, G1THM4, G1MUH7, F6UJY2, Q86VI1, M3WB40, I3MRI6, H2QBB1	Uncharacterized protein	InterPro
HSPA12B	-6.91	UniProtKB	H3ACA6, Q96MM6	Uncharacterized protein	Ensembl
S100A8	-6.85	UniProtKB	M3YAE9, H0WH36, U3CKF6, C3S7K5, J9P8S3, F6QJD8, G1SXG6, G1NYX9, F6SK92, E1AHZ7, K7GQW2, I6XM79, W5NQK9, G1RHF0, G3W261, I6WCE3, C0LQL0, G3W262, F7IHU7, P05109, F7FV87, F6YYI3, A0A0D9S5P4, H2Q028, G3TZS9, H0UWS1, D2HJR9, M3VWD6, H2N5P6, I3MT07, P28782	Protein S100	InterPro
FCN3	-6.83	UniProtKB	Q6UXM4, O75636, A0A096NDK9, G1REQ6, G1NWF9, F7HFD3, H2PYF4, K7F4D3, F6UDF5, H2N8D3, F7DWT4, G3QCU8, H0XCK4	Uncharacterized protein	Ensembl
LOC101866646	-6.81
BATF2	-6.8	UniProtKB	M3W5J4, G1R050, F6WRF2, F6YM41, F6YLS1, G1PS25, H0WIF5, A0A0D9R5C6, H2NCY1, Q8N1L9, I3NFU0, E1BNQ5, H2LLS9, M3YM23, W5PP13, G1MHA8, I3LV04, G3RSE3, E9PJ73, A0A096M3T7, H0W0P0, B0CM74, F6PHR4, W5KW58, F7HPY7, G3VLU5, G1T713, E2RQV3, B4DV37, B0KWL2, H2Q414	Uncharacterized protein	InterPro
MT1X	-6.76	UniProtKB	H2QB58, Q8WVB5, A0A096NIK9, F7IG20, P80297, H2NQZ1, G1QP91, F7GC79, A0A0D9QY73, U3KQD7	Metallothionein	Ensembl
LRP4	-6.69	UniProtKB	O75096, F6W5S4, G3TBV6, H2NDK1, A0A087XA83, H9FUD8, D3DQQ7, F1SIB6, I3JJI4, I3JJI5, W5NBR2, F7CG21, F6ZUP6, G3WVR6, W5LGR5, M3ZGU8, G1RVR4, F1PST3, V8NTM6, F7C3H1, K7ASF7, U3EE40, G3WVR7, G1KC02, G3QFE1, V8P1Z0, H2N1Q4, H0V998, H2Q3I3, G3PYA2, A0A096LU91, A0A0D9R060, G3RRH9, H9YVU0, W6AC86, G1NEG5, F1P1P9, F7CG08, F6UQ73, D2HHJ3, U3JUV3, W8AYX7, M3Y0Z4, F6UBW2, H0ZJY3, H3CW49, Q00KA9, H3BHQ5, A0A…	Uncharacterized protein	InterPro
S100A9	-6.67	UniProtKB	P50117, G1RHE3, G3W0M1, H9L3Q6, C3S7K6, A0A096N1R3, F7AJJ0, G3QEY7, G3U8X1, F6RM82, E1BLI9, I3MVD9, P06702, H0XY71, M3VZX1, F1MHS5, A0A0D9S5P6, A0A0A0MQP9, J9P732, H0UWS6, H2Q026, F7ID42, F7F8G8, P28783, H2N5P8, W5NQH6, G1Q9D9, M3YAG4	Protein S100	Ensembl
LOC102132068	-6.63
RASL11B	-6.6	UniProtKB	G3R927, Q9BPW5, I0FJI5, A0A0A9YNH0, E2RKP8, G3T1C8, H2QPG7, F7ISD9, F7E6C5, G1R9S3, A0A0D9QY50, Q5E9J3, G1NH62, H9FBW7, A0PHL1, U3JL11, K7B2E1, F7ISE2, W5QBB4, U3I4Z3, G1SDX1, I3MUF7, F1SE66, K7FBJ9, H9GAM8, E1BWN3, K7FBJ3, A0A096MRX8, G3WX06, F7H4G5, H0VHM1, G7MTB6, M3XE53, H0ZBZ4, G1TUZ2, G1LNC0, H2PDF4, F7EPR4, M3Y343, F7AYJ5, H0X0S4, G1QBT3	Uncharacterized protein	UniProt
CYSLTR2	-6.59	UniProtKB	G3TRV6, M3X1Z6, H0ZPM9, G1NRB3, D2HB76, A7MBH4, G1TPG5, H3AAN2, F1RK16, G3WHU8, E2RDT5, H9FCU5, W5NNE1, F6XJU7, A0A096MYP2, H0X8U4, G1S9C5, F6RWL0, A0A0D9SBA4, F6VBV9, U3KJ67, F6X0V9, Q95N03, W5PEV1, G1Q1Y5, F7HAY1, G3QYB7, H2NJW1, F1NV83, K7F0H4, U3I007, Q9NS75, I3MWP3	Uncharacterized protein	Ensembl
EDN3	-6.58	UniProtKB	M3WUP0, Q3L1G9, H2P2G2, U3J4D9, E1B9R6, A6QLQ7, Q765Z4, A0A0D9RSV6, I3MJI2, A0A096NNF5, V8NIH4, F7FQJ7, G1TRJ7, G3WC75, Q6LDQ8, F1PNP0, G1M1A1, H9F4A8, G1REM1, H0XU51, H0ZCD4, A5A752, B4XR11, H2R2X8, H9G7X6, Q4FAT2, H0V3U8, P19998, H3B725, G3RAU4, F7AE96, P14138, G3T591, F7I8W9, F7I8W8, F7FQK2, F6ZC95, G1Q4Z1, W5Q2Y4	Uncharacterized protein	Ensembl
APLNR	-6.53	UniProtKB	F7BJB0, O97666, H9FGJ2, F7I1H0, G7NDB4, V8NR11, W5PTA1, G1TQW6, U3KLM5, A0A0D9R0U9, M3Z566, A6QL98, F6QWW0, G3U7D0, M3X9N6, I3NCW6, H0UTN4, H0XVA7, H3A871, G1RPT2, G3WMF3, H2NDH0, P35414, E1C968, G3S9B3, J9P517, F6V0H6, D2HK54, K7EWI5, A0A096MNI3, F7FI93, H9FF91, G1P8J6, H9FAA5, H2Q3N6	Uncharacterized protein	UniProt
LOC102126333	-6.52
AIF1	-6.48	UniProtKB	I3WTX1, A0A0D3ZEG1, G1Q9Y8, A0A0D4AY46, A0A0D4A002, A0A0D3YX25, A0A0D4B331, Q5TM25, M3W2A7, A0A0D3ZLU7, A0A0D4AH71, A0A0D4A8F5, A0A0D4AEY2, A0A0D4B4P9, A0A0D4AKC8, A0A0D4AVS5, A6ZSE8, A0A0D3ZHH2, A0A0D3Z4T2, A0A0D4BAY0, A0A0D4B1F5, A0A0D3ZE61, A0A0D4B3K6, A0A0D4A210, F7BN52, A0A087XDP8, A5D9N3, P55008, A0A0D4B9C8, A0A0D4ACF0, A0A0D4BC20, G7MRI7, A0A0D4B0Z4, A0A0D3YUW3, Q5STX8, Q9BDK2, A0A0E3KVP2,…	Aif1p	InterPro
CTSL	-6.39	UniProtKB	Q28944, P25975, B5LVX4, P09648, Q9GL24, G3VJ29, P07711, G1SV24, F6VSF4, F7BZ41, A0A096P1X3, Q5T8F0, P25773, W5PFV1, A0A0D5MDN3, G3SEM1, F1PMM9, Q75SZ8, Q9HBQ7, Q5PXQ0, Q10991, F1S4J6, H0WIE5, W5K2W6, A0A0D9R4W3, U3JLM6, A0A024R276, G1R047, Q9GKL8, E1UJ48, I3MPU7, G3QCY5, H2PSK9	Cathepsin L, isoform CRA_a	InterPro
TUBB1	-6.37	UniProtKB	R9XNW4, P04690, A0A0A7DMR4, A0A0A7DMI8, P37392, A0A0A6ZF98, H0ZCG6, A0A0A6ZFA2, R9XJI4, I0JGU7, P46263, P11857, H2P2F8, J9P716, A0A0B5KTY9, Q6EVK8, P29500, A0A0A6ZF48, G3WIQ8, P22852, G1REK1, P20364, U3K827, G3SLF7, P25862, P12459, Q9ZPP0, F7I1T7, F7EJ93, R9XKX9, P33630, P12411, H2QKN9, A0A060CHG2, F6XQ37, R9XLT1, A0A0D9RSU3, M3Y6Q4, Q9ZRB2, Q9H4B7, H0X8Z2, E1BJK2, M3W5Y5, A0A059XP51, G1N9A2, A5G…	Beta-tubulin	UniProt
LOC102134891	-6.36
LOC101926338	-6.33
FPR1	-6.31	UniProtKB	A0A0D3YXJ5, A0A0D4AZI6, A0A0D4AIL1, A0A0D4A4P5, H0XM54, A0A0D4A0I3, A0A0D4B6P5, A0A0D4A657, A0A0D4A8W3, C1BWL9, A0A0D3ZYE3, A0A0C9QA68, A0A0D4AUH0, M0R315, A0A0D4BBK0, Q6CF41, A0A0D3YUF1, F2QRR1, A0A0D3ZW63, A0A0D3ZL09, A0A0D4B9T1, A0A0D4BC23, A0A0D4AXT2, A0A0D3ZBL4, A0A0D3ZV31, A0A0D4AYX6, A0A0D4ADT5, C1BM00, A0A024R4J1, M0QZT0, A0A0D3Z6G0, A0A0D4B1K2, A0A0D4A7U9, A0A0D3ZXC5, A0A0D4AT07, A0A0D3Z…	Peptidyl-prolyl cis-trans isomerase	GOC
LOC101865208	-6.31
ENDOD1	-6.26	UniProtKB	K6ZY85, H2NF04, O94919, A0A0D9S1L8, H0YUV0, G3SG15, I3LVV3, U3I6N0, G1PQ53, F6XA88, U3AUI9, E1C8W3, G1KPC6, F1STI9, K7FWS7, V8NUC1, M3XGC9, G1T6M0, W5Q663, D2HT55, G1NQL9, M3YLG6, V8NA98, A0A096MQL2, F6RVV9, V8N742, F6PGL2, V8N4Y2, S4R6U8, G3USA4, H2RGV9, G3WV10, H0XLJ5, F6PGI8, V8NCE3, A7YY77, F1PQA0, G3WV09, F7AJA1, K7FWT8, G3TQ75, V8NVU1, U3JC34, G1R660, G3RVG9, V8NAP5, V8N694, H0UY00	Uncharacterized protein	InterPro
LOC102146426	-6.26
TRHR	-6.25	UniProtKB	U3IH35, A0A0A1X8C4, A0A096NAR2, G3RKI5, Q53AR7, K7FEZ5, I3MPG2, H2R9Q8, E2R0P6, F7HI57, F6QH38, F1NC13, O93603, F6WCI0, D5FUH2, G3SZ11, G3VFS4, U3JUC6, D5FUH1, G1NII4, H0WUC8, D2HA59, A0A0D9RGX0, G3VD12, Q28596, F7DWM0, O46639, M3Y3E3, H2PR13, W5U6C7, A0A0B2V6X7, M3WD44, G1QVZ3, V8NM97, F7AUF1, P34981, G1KK31, V8P6V7, H0VIY8, G1SKI4, H3AFG2, H0ZPS4, A0A0B2VNR8, A0A0C9PI89	Uncharacterized protein	UniProt
LOC102123433	-6.21
ADAMTS5	-6.19	UniProtKB	M3XPL1, F1P3S7, U3JW21, A0A087X8I2, H2P2U4, F7GCA7, H2QKW1, J9NYI3, G1MFY3, I3MCJ7, H2TSQ5, G1KPY2, U3IM43, A0A0C9RVR6, U3IM45, K7C8I8, H3AYS6, A0A0D9R9N7, F6RJX5, I3K2F7, M4A3V7, H2LJR8, I3K2F6, G3TFM1, V8NYE3, F6VXD6, F1MRZ2, H0ZTD9, M3VY90, G1NNU3, F1SHP0, F1PGK9, G1PHJ1, W5L716, V8NZ03, G1NNU2, G3WI56, S4RRL3, A0A096MYT2, S4RRL5, W5PZS2, W5MXY1, K7FPH2, G1SIH2, H0X883, G3QVR6, H3DAM2, Q9TT92,…	Uncharacterized protein	InterPro
GADD45A	-6.18	UniProtKB	Q60GI5, H3DIH9, A0A087Y8A4, G1NHD6, G1P308, H2MH52, F6W540, H2MH50, M4A6X3, F7E1K0, F7C087, P24523, P24522, H2R902, G1RDG6, H9GI61, J9JHW5, F7EEI3, H2UW18, M3XNZ5, H2UW17, G3T3K7, Q3ZBN6, F6SSE6, Q15B93, H0XV29, F7HPG4, A0A0D9S712, H9FA89, H3A403, W5UKS7, K7FEJ4, I3NAW1, W5UFI5, F7EEF3, G1SW81, A0A096N8C4, I3IXS3, G3R5D8, W5PNZ3, I3IXS2, H9F132, H2N736, F7DTF6, G1LCY5, A5JUZ3, A0A0A1XLZ6, H0V6C5	Uncharacterized protein	InterPro
STON2	-6.14	UniProtKB	H2NLY8, F7IA39, E1C840, F2Y7J8, F2Y7J9, U3I618, Q8WXE9, F6V7M3, F2Y7J4, G3U6M8, H9LC54, F2Y7J5, F2Y7J6, F2Y7J7, Q6NT15, F2Y7J0, U5N713, F2Y7J1, Q17R23, F2Y7J2, H0VPN5, F2Y7J3, H9LBX6, H9EZR8, H9LBX5, H9LB94, E1BNH3, G1TTN6, F7AF26, H9LB96, M3WFL3, H2Q8Q6, G3T8P7, H9LCD3, H0ZQ61, E2RR53, F2Y7K1, F2Y7K0, Q6NT53, F7IA75, U6DJL3, F7H5J4, H0YJ05, G1KTX5, I3M6X9, G3VT86, H0WRL9, G3QMG0, G1L577, M3YB58,…	Uncharacterized protein	Ensembl
HOMER2	-6.13	UniProtKB	H0YNR9, M3YVT5, K7FH04, F1N9M6, H0VRL8, F6WSQ1, H2V3M2, H9G9H3, H2V3M3, H2V3M4, H0WXJ9, U3K9J2, G1N6W0, F6YP10, G1NW02, G3RI65, G3TYX1, Q0VCH1, A0A096NN09, W5PWS2, G1M6T8, F1PI91, F7H931, F6PNR1, F1RIA0, Q9NSB8, M3WXJ0, G3WZ75, G1TB52, F6PNT0, F7ILZ2, H2Q9Z5, G1RJ92, H2NP23, I3MCA7, R0KS59	Uncharacterized protein	Ensembl
FES	-6.12	UniProtKB	G1NDE7, G1NDE5, W5PSX7, S4T6D1, H9FAE2, U3ID89, F1PUK7, H0YNN8, F7IBY8, H9H312, G3QYQ6, F6XQG4, G3SX96, H0W9I7, E9PIJ7, Q4JFK8, I2FIF5, Q09XM4, I2FIF3, E7ENM8, F6RWR2, I2FIF0, H2QA35, Q5E9H3, H9FHS3, A0A0D9RWV5, U3IDA5, E7EMJ7, Q2Y0A5, M3W596, I3MNM8, Q2Y0A3, Q2Y0A4, I2FIE6, A0A0B2V4K9, A0A0A0UDN3, F1RMJ0, F6Y8A0, C0SQJ7, I2FIE2, A0A0B2W5E0, G3W6K1, H9FKB2, A9XJT6, A9XJT7, E9PGC7, A9XJT8, P07332,…	Tyrosine-protein kinase	UniProt
LOC102142966	-6.08
AMIGO2	-6.06	UniProtKB	G3SDA6, F7I1J3, A0A024R127, F1SGW7, M3Z5F8, M3VWT3, U3KKZ7, G1TZU6, H0XVD9, R0M2Q8, F7DI72, A0A096NCW5, H2S601, F1N348, H2NH22, I3MYI9, G1PES3, H9FKV2, F7FJR0, K7F0Z4, G1K9S7, H0Z710, F7CBZ0, H9FIK2, G3T363, H0VD01, Q5R7M3, H9FAW8, H2Q5S1, Q86SJ2, D2HJ35, E2RB23, E1C7K9, W5Q8K7	Adhesion molecule with Ig-like domain 2, isoform CRA_a	Ensembl
FMOD	-6	UniProtKB	F7H3T3, Q9TTB4, Q06828, G3WXK1, M3X3M3, K7A2A5, E1BI02, F7FA56, F1NLZ4, P13605, U6DQE3, G1SWS6, H0WG08, G3R879, H9FAI3, H2N436, H0UUL6, K7G2H0, I3N847, F7DPP9, R0JM93, H3A572, H9F176, F7H3U3, A0A0D9RPE0, G1S917, G3SSP6, U3KAK7, O46378, M3YJG8, F1PLN5, F1S6B5, H1A4C1, H9FKF4, G1M183, G1KAB9, P51887, W5NU76, A0A096NPX2, V8NPB8, U3DCP0, G1NAU5, A2Q126, H9FIZ3, H2Q0Y2, A0A024R971	Fibromodulin, isoform CRA_a	InterPro
PTPRB	-6	UniProtKB	C0PU66, E1BFE2, E6ZH12, F1SH38, G1L1F0, P23467, K7G9F7, G3QTY6, W5U5E0, G3RMF8, G3UFH5, F8VU56, F7BVN0, G1K9Y2, F7C049, M3Z1C0, F6UUL8, H0Z9S0, G1P835, G1NDV8, W5QFZ9, H2MXH5, A0A0D9QVY8, H0XAS7, H2MXH1, A0A0C9RSG0, F7GKG4, H0V631, G3W362, M3WCC4, H2NI20, A0A087XJN0, K7G9G6, V8NKL4, U3J193, G1QVX7, G1T2I8, G3SUY9, H9FEA5, H3A2L5, U3K6P6, F7IN86, F1PGJ4, G1L1F9, W5K8F7, A0A096MU70, F7INA7	Protein-tyrosine-phosphatase	UniProt
INMT	-5.95	UniProtKB	K7CQP8, F1SII5, O95050, Q5RFR7, F1MPC5, F7HSK5, C1C4U3, O97972, F7C1T9, Q9N2C0, A0A090N7V3, C1C477, Q9N2B9, Q9N2B8, F7BS30, E0V869, A0A0A0MQQ4, G1RYW1, Q3MIB5, H2QUD4	HCG2044801	InterPro
CHMP4C	-5.88	UniProtKB	G1NSE7, M3XDE0, F7FS96, Q2HJ35, Q96CF2, G1KP71, G3WAS6, H2QWC8, M3XRS7, H3AHT6, M3XL22, H0ZN64, G1SRU4, U3ICH3, G1QQI6, H0XCC9, H2PQP0, G3RKJ9, K7F341, A0A0D9RLB1, A0A096N241, E2R7B4, W5PZJ0, E1C252, I3MK08, F7H7C4, E6ZJ23, F6SNN9, F7G5G6, G3T7Y1, G1NGL9, H0VPD1, D2H4W1, F6U218, U3K1V2, I3LG19	Uncharacterized protein	Ensembl
LOC101865646	-5.88
PLK2	-5.83	UniProtKB	F7E4Z4, B5X9B9, W5PBE3, F1NB57, G3RAD3, K7FID3, E2RGZ7, G1KIX7, W5UDU0, U3K8W8, E1BP17, G3WRY1, F1SLJ2, G1MY43, F6R8R6, A0A087WUH9, I3LW17, Q9NYY3, H0YWM2, A0A024QZV1, H0WMD9, H3AQ93, R0KLY8, K7BXU0, H2QQY0, F7CYW0, G1PDD6, D2H938, R0JY31, G1QQ83, F7C4L7, F7HJL7, G1SSC4, H2REL3, F6TSY5, A0A0D9RUD3, H2RG21, A0A096NBN2, Q5R4L1, R0MGU4, M3Y7Q8, U6D6P4, M3WEE3, F7HEF4, F6Y665, H9EMK9, G3SST5, H0VXV4	Serine/threonine-protein kinase PLK	UniProt
CFD	-5.82	UniProtKB	I3MZR5, M3W7H5, U3KHN8, B4F449, G3WMI7, T1W3L7, U3C211, V8P374, G1QJT7, R4GKG6, Q3T0A3, F6YBP7, W5PJ66, P51779, J9P5F0, G3QES0, F6W0D1, H2NWR7, F7BHB7, A0A0A0MV60, H0YQV9, H2R6K0, G1MXB9, F7AZF4, H0V7F3, H0XZ59, H9EXC1, F7BI01, A0A0D9RJT4, G1NZU9, P00746, G1L891, K7ERG9	Uncharacterized protein	InterPro
GLUL	-5.79	UniProtKB	B3VK57, U3JZZ9, G1SW00, U3ISF5, P15103, K7FMU7, P15104, F6TAZ0, A0A0D9RJ85, P16580, H0VEQ9, H3B669, Q8AX87, Q8HZM5, F6PH60, U3F4R2, Q4R7U3, H2Q0Q5, M3WDH0, P46410, G1S8N9, A0A0A0MPE2, G3SJV7, Q9QY94, A0A087WYJ1, F7HDF1, H1A409, I3MN37, F7HSN9, F7CAM5, F7I5X3, F6XKQ2, G3RPZ2, H2N4G4, D0G6X5, H9GDW2, Q8SPJ7, G1QGF1, F1NQC3, G3SM75, A1L199, Q6TEP3, G1MW53, T2MGE1, A0A096NYR4, G1LMC1, H0Y294, W5QBP6,…	Glutamine synthetase	InterPro
LOC102145299	-5.72
LOC101865747	-5.69
LOC101865577	-5.68
BTNL9	-5.66	UniProtKB	M3VVS9, I3MHB4, I3LLH1, G3T6G3, E2RGK5, Q6UXG8, A6QPT8, W5PAJ8, G1Q328, M3XQ53, A1L516	Butyrophilin-like 9	UniProt
GPR88	-5.61	UniProtKB	G3QZI6, U3J797, G1T2M7, C1BYJ4, A0A0D9SAE4, U6DCC4, F6XQX5, G1KBP4, H0XIP6, Q9GZN0, G3VZF8, G1MKP9, H9F035, U3KJ49, A0A096N2L6, E1C2M7, H9FBB0, I3N811, G1N4X9, J9P100, U3CPP2, H2PZH6, V8P146, K7FVY2, E1BHN7	Uncharacterized protein	InterPro
NGFRAP1	-5.59	UniProtKB	F6U9M4, G3QW02, M3Z5V9, F1RYD2, G1MJR9, G1PQP8, H0WC37, A0A096MLW9, H2QYY2, H2PWC6, W5PJL6, Q3ZBJ6, Q00994, K7C282, F7H6N3, H0XC32, G1TG54, Q14991, F1PR09, G1SAA0, G3U394	Uncharacterized protein	Ensembl
LOC101867052	-5.58
ID1	-5.56	UniProtKB	G1N5H6, E6ZFT0, W5NSL0, C1BXZ1, B9ELA7, A4IF68, H0WBL8, I3MA36, F7BIF4, P41134, E3TDM7, H9FTW2, B3W6M6, B5XG04, F7GUC3, A0A0D9RK08, K7D7R4, F1NXM6, G1REQ9, B5XBH6, G1M531, H2P1K1, G3TQ29, G3SB54, K7BF84, U3EVS0, B5X7U5, M3W2G6, B5XCP4, A5GXZ8, H3AFY1, U6DMM0, K7CP80, M3Z2I3, A5GXZ9, F6W9Y6, H0X0B5, B5X5B7, E3TFY1, C1BXR6, F7IT16, G3RJ48, B5XC34, G1U733, C1BWW1, G1Q7N9, C1BLL6, A0A096NV08, H2RDX7	Uncharacterized protein	Ensembl
SMIM10	-5.56	UniProtKB	Q96HG1	Small integral membrane protein 10	UniProt
LOC102132931	-5.5
PCDH7	-5.44	UniProtKB	H0XZQ4, K7FH92, M3XVK4, F1S4M3, F7CB09, I3MD48, G3WB64, H9F8D4, U3BE18, H9F8D3, E1BT47, F7ENA2, M3WLP9, G3QNN3, G1S517, U3K3D1, G1S515, F6S0G8, H2QPB5, H0YAH0, G1NDJ6, H9FL74, U3IUN9, A0A087X2C4, K7D3P3, O60245, H0XYM0, C4MH75, A0A096NZM0, G3U1H3, K7BAH5, F1PIR6, H9G5Y9, G1TUD3, G1LV35, H3ABV9, A0A0D9RW01, U3D5B4, F7HN04, K7BRL0, W5PH07, F7HN08, H0VF45, G3T6J2, J9NY06, I2CUP1, F7ENB3, E1BCK4, H2P…	Protocadherin-7	InterPro
MAFB	-5.43	UniProtKB	Q2PFS4, A0A096NXE7, H3BEZ2, Q90370, U3EBS2, I3N660, F6SRL9, G3S1R9, G1MW90, A0A0D9SBN6, E6ZFR3, B5X4T1, Q90888, H0Z2L1, H2R8Y7, F6XN23, F1N054, H2P1X7, G1NZ75, B5X1M5, U6DVV1, W5NTC1, K7GRV4, U3IG20, C0HAD9, M3Z1X9, K7EYF4, G3SF45, H0XUM7, U3JSU4, F1PT78, G3QFX4, M3WE15, H0W2S0, U3JSU0, H9EPT2, G3SZ70, G3X298, Q9Y5Q3, G1R3T7	Uncharacterized protein	Ensembl
GPIHBP1	-5.4	UniProtKB	M3X4P0, F7AHU4, Q8IV16, F7DAP8, G3UCL2, F6T0H2, G1QLB1, H0UXL8, A0A096NF68, I3MFQ4, W5NT65, H0XW29, G1LV85, G3SK80, M3YAT0, J9NWC6, H2QWT8, H2PRC4, K7E1F9, F7HE29, G3VII2	Uncharacterized protein	GOC
FAM124A	-5.39	UniProtKB	Q86V42	Protein FAM124A	IntAct
LOC102118767	-5.38
LOC101866183	-5.36
KIF1C	-5.35	UniProtKB	K7E2X5, G3US52, H3A489, F6XRW3, G3UTI5, K7BP32, W5P2L6, I2CWB9, H2R1V5, M3Z996, G3R1E6, G1LI26, U3JXN9, F6PRX7, F1RFY6, H0VD56, A0A096P2J3, M3WA28, I3L1B1, F7AT82, G1P9P9, U6D2V0, M3YHY8, F7H1Y9, E1BAV9, H2NSD6, H0XBW0, F6QSI8, G1N1Q5, F7GWT7, F6ULM0, A0A0F8D0D9, G1TN31, I3MJF2, H0ZUF5, U3CXD0, O43896, V8NE65, H9G5Z1, F6U1E7, A0A0D9RKB3, G1U2J0, K7FAY6, G3VFP0, G3VFP1	Kinesin-like protein	UniProt
LOC102133769	-5.35
PRELP	-5.35	UniProtKB	A0A096NPR2, M3YJH3, H3ADS3, D2H8Q9, U3J4F7, F7DPK0, G1SXR1, F7GFP1, H0XWH5, H2R1T6, G1P0H1, A0A0D9RPE4, G1KAA1, F6ZY96, A6QQQ3, Q6FHG6, G3WYF3, H2N435, E1C7T4, M3WQY0, W5NUA0, H0VF43, F6RZ46, G3RIQ2, F7FA61, G1NAT8, E2RL80, G1S918, H1A4C6, F1S6B4, P51888, F1MX63, G1U0R6, U6DRW4, I3N6A5, Q9GKN8, G3U8Y9, G3TTN4, K7G2E4, I3MHJ5, U3JB47	Uncharacterized protein	InterPro
NPY5R	-5.34	UniProtKB	G3VQL9, U3HYE7, Q06B55, H2PEN2, F7HYX5, I3N619, G1M814, A6QQX6, K7EYE0, J9NTY7, M3XA14, F7I3N1, Q15761, U6DXH0, H0XS86, Q9GK73, A0A0D9S1W0, G1R3U2, G3QP85, O97969, F7HYU7, O62729, G2HFT0, A0A096NF17, U3K9B3, G3UTD6, G1KDL9, U3EI94, G1PJN2, W5NPX6, W5NNV8, F7CGL8, H0Z5X1, M3Z4Z3, F6YEI1, F6TWY5, G3TUR9, G3RQP8	Uncharacterized protein	Ensembl
PRR5L	-5.34	UniProtKB	H2R5H4, U3KD80, K7FVX1, M3X8V1, H0WWF2, F7E185, M3YK26, E2RCK8, H0ZIN6, F1MZG7, H2NDP1, Q6MZQ0, F6S652, F6Q5B9, G1P0J7, G3TH20, F1SHG4, H0VY40, U3J1A8, F6SAI9, G1T2E9, G3WJJ5, G3R0M0, G1KDP1, G1ND82, E1C6K7, G1S8G4, G1M5G1, F7F5F5, A0A096N840, W5QCK8, Q5E9R0	Uncharacterized protein	Ensembl
KCNJ12	-5.33	UniProtKB	M9ZKC4, F7GLZ2, E6ZGT0, R0LKG5, K4LR19, A0A087YQR2, Q9ESD9, W5UCF8, Q14500, W5NNI2, U3RJ95, V8NCT5, H9KXF8, U3KH93, G3P116, F6XH91, W5P2T9, A2VDS5, K7B7L4, U3FDL0, R9PXL9, D2I1B0, Q4TZY1, F1NHE9, H3D5N1, H2RAG5, H2NT14, A0A061SJR7, M4AZ12, F1PLH7, G1RSV1, W5LSU5, F6KIF6	Potassium inwardly-rectifying channel subfamily J member 12	InterPro
HOXD8	-5.32	UniProtKB	M3X5H5, K7EH04, K7DP05, H0VSC6, W5Q7S9, H3AKW6, A0A0A0MSX5, G3WTY5, D2I1G1, I7AK88, H2P7X7, F6WRM4, F1RZG1, A2T748, A0A0A0MTF4, G3TWC3, F7HIP6, F1P8H3, A0A0D9RPM0, G1QET5, P23459, U3IN08, I7AVN5, G3TXW9, G9HPT1, H0XDV5, I3NC19, F7A9D3, G3SU44, G3UUJ8, Q9IA12, M3YRJ3, K6Z9A9, A1YF02, G1R243, P13378, F7E270, A1YFJ1, F7FTK4, U3JKI5, G3R348, A1YG72	Homeobox protein Hox-D8	InterPro
LOC101865956	-5.32
LOC102120646	-5.31
SIGLEC11	-5.29	UniProtKB	F7GYG9, F6ZN86, Q96RL6	Uncharacterized protein	UniProt
SPIC	-5.24	UniProtKB	F1SRI6, G3TFL7, A2D5T3, W5UF25, D2HXI3, R4GFH7, Q8N5J4, F6Q0A9, W5NMY7, R0JRV6, F1MW11, Q1RML4, A0A096MM74, G1S9A3, A0A0D9S1E9, M3YKA7, K7G9L9, A2D4Z8, G3VU21, H2NIE3, H0ZM74, G3S5M1, G1NKA1, M3WR69, H0V9S5, G1KT43, W5Q075, G1PHC0, U3K351, F7HYR2, V8PGD6, F6PYN3, G1U3R7, F6XL56, H2Q6Q0, H0XCN5, H3AFI8, B5X8F4, A2T6R0, A2T7R4, E2RCB1	Uncharacterized protein	Ensembl
N4BP3	-5.23	UniProtKB	K7GJY2, F1S3E1, I3N9U1, W5P7Z7, O15049, Q5ZLT3, A0A096NAF0, E1C2M1, H2PHJ4, H0WUX8, G1LIW5, E2QZ04, M3XNU8, H0W9Y9, F7GB08, H9F7A2, E1BLB8, M3X8L2, F6WBA5, H0ZY26, G1PE52, H2R543, G1MY75, G3WS80, U3IT14, G3SMV8, U3K293, F6YCP0, G3QCR8, F7IML6	Uncharacterized protein	Ensembl
LRRC4	-5.22	UniProtKB	W5NWE6, F6Q3P7, Q9HBW1, R4GKL9, F7HGW6, F7DUX8, D2GWR2, H0VZS2, U3IX97, G3WUJ3, A0A096NB36, G3TMK9, K7G0I3, I3MVY6, Q58CS0, H2PNE9, M3XFH8, M3Y5A8, G1Q3R1, F7BVS9, G3R2F0, E2RH90, F1SML5, H0XS73, H2QVB4	Uncharacterized protein	Ensembl
NPR3	-5.18	UniProtKB	Q6FVA1, I3MIL8, F7CRI6, E2R6Z0, H3ADD7, M3W032, H3ADD6, G1PNF5, G3REY1, F7BZD7, M3YUR2, B7ZRE3, Q750J0, F6X319, G1MVA6, F7DBN8, G3TUJ9, U3JHG8, E1C1V5, Q0TZN8, B0JYL2, D6RDL8, G1RVE3, G3S3J7, P38742, A0A0D9RX66, A3LYV8, G1LI33, I3LBR5, G3WCY7, H2QQQ3, F7I3P3, F7I3P2, A0A096N1M4, G1SZF5, C9JK69, K7CWF9, W5PRE4, G3T9A2, Q8L746, G1L9U7, A0A096N6E9, A0A0B2VCE1, P17342, H0WPI7, Q6CJJ1, Q5A319, A5D9Y9,…	Uncharacterized protein	UniProt
PSTPIP2	-5.18	UniProtKB	H0V456, A0A096M1Y1, A0A096NGD6, G3UUW4, A0A0D9RZE5, A0A096NRV5, F7A8P1, W5MZ86, H3CQ24, Q209Z9, H2NW94, H0WVQ3, M3WUQ0, F1RPT1, U3K2J8, H0YTM1, G3PUZ0, G3RRE2, F1PHQ2, A6QR13, G1M1Q4, M3ZRP5, Q9H939, F7H9U6, G1MRX3, G3SQI0, K7FSQ3, V8N7X8, G3WXC6, G1SD23, F7H9V5, H2QEH2, G1RJA4, H2QEH1, U3IWQ7, I3M2P4, F7ETE3, M3XPF9, F7ETI5, F1NGA7, W5NXX6, F6VGR2, W5LHS7, F6T340, H3A321, A0A087Y4X9, W5NXY0, G1K…	Uncharacterized protein	InterPro
RGS2	-5.15	UniProtKB	A0A0D4H838, Q59Q05, G1P2I4, A0A0D9RLP3, H2Q0T4, H3AB17, B5XAS5, G3UN61, Q0P5H5, G3QJV6, A0A0D4FEJ9, B5XCX5, A0A096N8N4, H9GDV9, A0A0D4ESL2, G3UCJ3, U3I3K8, B9EN10, U3JLA3, F1N3V3, A0A0D4GYC1, W5PIT6, A0A0D4HP07, B9EPP3, F6ZHH7, C7GMM9, V8NIV7, G1N1C0, F1PUM1, A0A096N0C5, F7HBZ1, A0A0D4HJF6, G3WG24, A0A024R939, B5X9B5, P41220, H0VJJ6, Q49A86, A0A0D4EJM4, K7FKN0, M3X7Y3, A0A0D4FPE3, G3UDI5, G1N1B7,…	Regulator of G-protein signalling 2, 24kDa, isoform CRA_a	Ensembl
KLRD1	-5.1	UniProtKB	Q8NFL9, F1SQ24, Q9MZK9, G1QSQ0, G1PPY6, M3Y522, Q38HS3, Q8NFM0, U3KNA3, Q9MZ41, Q863H3, H0VEZ2, F6WUD2, F7HHM0, Q13241, Q8MHY9, G1LD93, H2NGH9, Q53ZY6, A0A096MZT5, G3R4P8	Uncharacterized protein	Ensembl
LOC102131610	-5.1
P2RY2	-5.02	UniProtKB	H9F3N7, H2ZZ07, H0WH34, F6QZ51, U3J6B1, H9FL66, W5U5R0, F6X702, P58825, D2H1G0, G3U1Y6, G1NZ39, U3KJD2, H9EZT6, F1NPB9, A0A024R5N1, G1U5L8, F1MDI7, I3N666, C1BHK5, G3RAV4, G3VJZ3, F6SV44, A0A096LZX9, U6DKA5, H2Q4D2, K7EXQ5, A0A096N579, F7IT87, H2NEL1, P41231, Q5YA25, H3CY59, C6G7W2, C6G7W1, Q99PE3, A0A087X994, H0UYV3, W5NNV9, O18951, A0A0D9S942, F7FNR3, E2RDZ5, H0ZTD2, G1S5M1, M4AUK2, M3Z745	Purinergic receptor P2Y, G-protein coupled, 2, isoform CRA_a	UniProt
GATM	-4.99	UniProtKB	F1Q3D6, G1R1M8, H0X0M3, Q2HJ74, H9G945, W1J1P3, G1N6J6, G3TIM1, U3K9W2, Q9I9K9, U6DK66, S0F3G4, A0A096NLZ6, I3MIP7, H2NN48, F6Z4H7, H2Q9D1, F7A204, F7GZ52, P50441, G3VNE7, W5QIR6, P50440, H0VB49, F7CQX3, G7MX82, G1P8U0, Q4R806, F7GZ40, F1NXN3, K7FEY6, G3RTK2, Q5RFB9, F6TSW8, A0A0D9RD16, G1T784, M3X5Y1, G3R5T0, V8NCY9, A0A077NXR0, A0A024R5Q4, H9F4I1, M3YI80, U3I6G0, G1M1W7	Glycine amidinotransferase (L-arginine:glycine amidinotransferase), isoform CRA_a	GOC
RENBP	-4.93	UniProtKB	F1Q0H0, K7GM41, F1RZU4, H3AIC3, P17560, H7C1A7, G3SZB7, G3R2V3, I3MF53, G1U2M5, M3WNP8, A9CB51, F7HPX2, B0KWW2, O18921, B1MTW2, F6YUM9, B7NZP4, B5FW88, F6QCF6, H2QZA1, W5U829, A0A096ML31, F6RHQ0, H0VX77, G1KM50, H0W7H3, G3MZ53, C1BLN2, A0A0D9R3B3, G1RTV6, H0XQ27, K7GKL5, F6SGH8, Q2KIS1, W5NTZ3, A6NKZ2, H7C317, K7GMP7, H2PX71, G1MJH4, H7C2G7, K7GQ05, G1PPN2, B2KII7, F7B0V7, P51606, F8WE83, G3VUX2,…	Uncharacterized protein	InterPro
LOC101866479	-4.88
LOC102141499	-4.84
PYCARD	-4.81	UniProtKB	V8NK24, H2QAZ9, F7EZX3, Q9ULZ3, H2NQS5, H0WZC2, F6RLH2, G1DFY4, G3RLS4, A0A0A7MD22, F7HVN3, M3VYU1, M3YJ24, F7HVN2, G1Q4C0, F1MQF6, Q8HXK9, F7EZU2, K7BZC8, G1SLX6, A0A0D9R076, G1S2K3, D2HQM1, E2RQ18, H0UWD1, A0A0B8RTB5, I3MKY3, W5PGJ7, A0A096NHY2	Uncharacterized protein	Ensembl
GATA6	-4.8	UniProtKB	F7GIW0, Q95JA5, H2ZZM8, U3IDW2, Q92908, H0W7D7, B0JFA1, U6DZM1, A0A096MVE0, Q9SD38, F7FVD0, A0A0D9RYJ6, G3RZ55, F6V1N7, I2CV65, M3Y2M5, Q05CA6, K7FPL1, F7G2T6, F8WQV6, G1PN54, A0A096MTG2, G1M4Z0, M3XAS5, P43693, F1N1M2, G1M4Z8, F1N9N1, H2NW10, H0XIH7, F7I2H6, G3VXC7, G1R509, U3JUH4, I3N2Q7, G1NCA4, G1TX82, V8P0Q9, H0ZJB4, F1PZS8, F7I2H1, Q6JDL1, W5PEK3, H2QEC0, G3T0W5, D9ZIZ3, G1KH24, G3SCV1	Uncharacterized protein	Ensembl
LOXL1	-4.8	UniProtKB	K7BR49, H2RCD9, G3SAN3, A0A0D9RNM5, A0A096NMP3, A0A096NMP2, G3VDF4, G3TSZ7, F6RLS1, H0V6Y1, G1Q2S2, U3J6I1, J9NVY4, I3LKT1, F7BDT5, Q08397, M3Z0N4, G3T4W9, R4GK41, F1PQU6, G1SEG6, W5P2M3, I3MLA8, F6SA67, I3LV29, H3AVB5, A0JNB6, F6UJX6, G1MTI2, K7D9E1, K7G9T3, G3RFS3, U3KCN6, H2NNQ4, F1SIC9, Q95L39, G1LRN1, M3WFA5, F6SAB9, F6RXA9, U6DJA9, G1RVT4, H0XTK7, F6S0D4, H9GP18, F6Q5T0, H9F729	Uncharacterized protein	InterPro
NQO1	-4.79	UniProtKB	K7G024, M3WV10, H3BNV2, H2QBF4, G3T2V3, A0A0E1R8W3, W5P093, F6PFV8, Q5RD31, G3WR78, F6W6Z4, M3Y7R7, F1PBZ4, P15559, H0WQ80, A0A096NS14, F1S395, U3IKZ7, G1N939, G1R0L2, E3TE47, Q3ZBH2, D2HMQ1, E1BYW3, F7EKA7, G3QL89, G1PPF1, H9G7W3, F6RW03, G1SLQ3, I3MQU6, F7CXV7, Q8CHK7	Uncharacterized protein	Ensembl
LOC101867174	-4.76
NRP1	-4.75	UniProtKB	A0A0D4PTI5, A0A0D4NUU0, A0A0D4Q8E2, A0A0D4QW93, A0A0D4NYH1, A0A0D4MSM2, Q5A791, F7DVT3, K7GN82, A0A0D4L9C2, A0A0D4LNA6, A0A0D4QAB2, O14786, H0X2D1, A0A0D4PEV4, P32770, F6UNY1, A0A0D4R4U9, H2Q1T2, A0A0D4R2L5, A0A0D4NWT3, E9PEP6, A0A0D4MQR1, A0A0D4PCT5, A0A0D4PS36, F7HHS9, A0A0D4LYC4, F7HHS7, F2QUN5, A0A0D4LVN6, F6WJ50, A0A0D4LLA3, A0A0D4NC18, A0A0D4PMV5, A0A0D4RDV5, K7GP77, A0A0D4N345, A0A0D4P5X8,…	Nrp1p	InterPro
ZNF703	-4.74	UniProtKB	M3YF66, F7HWB0, I3M669, G3R800, H9GQ75, H9FC71, G3RP60, A0A096MYN0, G1LWL9, F7GS05, M3WYD5, U3DU56, Q9H7S9, F7HSV2, H2QW06, F7HSM5, W5P235, H0VAX3, H0XR62, E1BBV0, G3UDA3, H9FID6, H2PQ17, U3JWT8, G1LWK7, F7EFS4, H0Z837, E2QX95, F7FJ52, F1RX82, A0A0D9RT31, G1PJ08, U3ENS5, F7C4X0, U3IZ84, G3WJG4	Uncharacterized protein	InterPro
FHOD1	-4.67	UniProtKB	U3JXR6, F6RUF3, H2STY2, H2STY3, H9F5C8, F7FGT0, H0VHV6, H2STY4, H2STY5, K7F9P5, G1MSC4, H9FEP0, M3Y3R1, W5NXZ5, G1MG28, G3WDP2, G1QWU1, F6Z5Y2, G3TZ90, F6PPX2, M3WB44, I3MXI8, A0A096NE35, G1NUY9, F7B7G0, G3R3E2, Q9Y613, H0Z621, H2NR70, J9P820, G1TP57, U3IJ74, H9FJB1, H2RA42, E1BIN0, H0WFJ7	Uncharacterized protein	Ensembl
LOC102138348	-4.65
DNASE2B	-4.63	UniProtKB	A0A096MCH8, G3P585, H2N6X6, U3JU33, G1M4P9, F1PA96, A0A0D9S6W5, G3QY60, G1NAH7, G1PTN2, F7BX32, A0AUY7, M4AU54, H3D3Q1, W5MP03, Q148D7, F6Y5N6, M3WA89, H0Z889, I3LFM5, H0VJE2, G3WZP0, I3MYI2, K7FHC3, F6WHU9, W5ULA1, U3KNW7, Q8WZ79, U3J9T4, H9GAK3, W5PWM6, M3Y2Z3, H2PZA4, W5LDJ0, G3U7I3, H0WSZ3, T2M7V6, H2ZS51, Q66K39, F6X4X0, A0A096MYU6, F1MMW2, G1RFT9	Uncharacterized protein	InterPro
MAATS1	-4.61	UniProtKB	G1NNA2, Q7Z4T9, Q95LR0	Uncharacterized protein	InterPro
CCND1	-4.55	UniProtKB	P24385, I3LWK2, Q6XSC6, A0A0F7KN53, F5H437, A0A034VQI7, W6FIJ5, Q2KI22, Q0GMK9, H3AZA4, H3AZA5, G3VK21, F7BZY1, Q6XSD6, F1PPQ3, G1NC37, U6DAY2, H0Z4M3, W5Q873, M3W9G0, Q64HP0, I3MUX5, G3T0G2, A0A0D9RA90, K7DNI7, H9FY18, K7CI96, Q6XSE6, Q4RZE5, Q6XSE5, Q6XSE8, Q5R6J5, W5Q7S7, Q6XSE9, R0JP78, F1RY77, K7FTY5, G3UEU3, H0X4X8, H2NCK0, H0V4A4, M3XZN1, Q6FI00, C0H9B3, Q6XSE0, A0A096MKW5, Q6XSE3, F6VW21,…	G1/S-specific cyclin-D1	InterPro
PPP1R3B	-4.55	UniProtKB	A0A0D9SB16, H2PPK9, D2I1W2, F7AGW6, H0Z3A8, Q86XI6, G1NAF2, G1PTX5, H2QVQ8, U3JW92, A6QNP3, M3Z8A0, G1RY68, F6RLB0, F1PR81, H0WL94, F7FFM0, V8NU25, G3UKC7, G3VGB4, G3QUV6, W5PK57, F7BLM2, H9G6U2, H9ZDK5, R4GHP3, F7C6V3, I3L6I5, M3X0G1, G1DG72, H0UXH5, U3IVJ0, G1TV37, K7F0U2, I3N816, A0A096MLQ4	Protein phosphatase 1 regulatory subunit	InterPro
BICD1	-4.53	UniProtKB	G1LQZ6, F6T3N9, G1TEK8, F8VZX7, H0UWG9, A0A0D9R4X8, H0ZML5, G1KMR4, G3RVD9, F1ML98, A0A087WYJ7, G3U1X4, M3ZAK9, F1SGB9, Q96G01, A8MVZ6, F6TI85, A0A096N9C7, H0WQT9, F6T3Q7, W5QDM0, V8NWI5, F1NPR9, K7AD16, I2CTC0, H2NGX9, E1C246, G1PE61, G1NKV1, V8N5S7, F1PS86, I3L5X5, W5QDL9, H3AFC5, H2R7B0, U3K305, J9P1N7, M3WG82, M3XMB4, F8W056, G3N061, I3M3W3, H9FBU0, G1S3I7, G3RK02, K7FU79, H9FLR1, A0A096MXV1,…	Protein bicaudal D homolog 1	InterPro
PDE2A	-4.49	UniProtKB	F6Q8H8, F5GXX2, I3LNQ5, T2MJU7, H2NEK5, U3F811, F7EBA5, S4RHB5, H0ZTM6, I3KIV7, I3KIV8, U3CE62, O00408, S4RHB9, Q9GTN9, M3YEL2, H9FVG9, I3M4X7, F1N0Y8, H2TEI3, H2TEI5, H2TEI4, A0A0D9QVV4, E9PEF1, U3DA01, F7G3R9, Q8IW54, H7C009, H0WTQ9, H2TEI6, H9G6T8, R0KEB0, W5P6L9, A0A096MYA6, M3WID8, I2CYN9, F6TL18, G1U4Q4, G3NY20, K7FWB0, U3JUQ9, G1S5U6, M4A9D2, H2R546, W5MLN1, G3W5P2, H0VIU3, G3W5P3, V8NBF2,…	Uncharacterized protein	InterPro
FSTL4	-4.47	UniProtKB	F7D4K8, A0A0D9RMI0, M4A1D3, U3JE64, A0A096MTL1, H0VAG7, U3J793, G1N8U1, H2PGJ5, G3R6H6, H0YST5, W5PVW8, M3YFW2, H2QRH3, G1SV72, V8NWT1, G1U546, F7CIV9, F1PS08, M3WL02, F1PVI8, U6DCL6, F6XKN9, K7FBY2, G1N8T8, F1NWP0, F7BX29, G1R990, H9FKD6, F7AX67, Q6MZW2, E1BQD7, G1KL96, F7GM87, H0X2T8	Uncharacterized protein	InterPro
LOC102131151	-4.45
LOC101867509	-4.44
SLC9A5	-4.42	UniProtKB	F6WC57, H0Z5X9, G3UCW7, U3ENI1, H9FIC6, M3X6L3, J3KSE2, G3R3F7, G3WEM1, A0A0D9QV28, F6VSS3, G1QWU9, H3A308, F6UNA1, A0A096MQD3, G1MG48, H9F3A4, M3Y3T0, Q14940, J3KSB3, U3JXN7, U3IJI6, I3MRJ1, G1MG47, G1NUZ7, F1NL74, F7I798, F7I7A0, H2NR71, G1SYH0, J3QRV1, E1B8Y0, F7AJ68, G3T514, H3BNY2, G1MT09, H0VHW1, H9FFK4, W5NY13, F6T448, G3UH52, H9FLU5, K7BJK7, E2RF13, H9FLU7, H9FLU6, F1RFX4, H2R045, H0WFJ8,…	Sodium/hydrogen exchanger	UniProt
LOC102132791	-4.41
VCAM1	-4.4	UniProtKB	G1RMJ1, H0V8G0, G3QL75, K7GLK2, H3B553, M3YKY1, F1S567, Q28260, A0A096MKK5, G3W454, G1N4Y5, U3JIE0, U3J794, F6W7X9, U3J791, F7FF34, F6WUE0, F8UU18, H9ZD67, F7G904, F7CRW5, H2N6M5, G0ZI12, H9F5X5, F1PCD0, A0A0D9S6M6, M3WED4, H0Z3W7, H0XCK5, G1T1S9, P19320, K7FW43, F6W7H7, G1PKX9, Q9GKR2, Q9GKR3, G3SRW0, F1P201, I3N2Q1, F2YYR6, H9FCR9, A7MBB0, F7G9K8, H2PZH7, G1KBQ3, G1LSS1, E9PDD2	Uncharacterized protein	Ensembl
CREG1	-4.37	UniProtKB	B5X4P6, H2N4V4, H0VHK2, F6XUV6, C1BIT6, F1S268, H9EWY6, G1NNN9, F1MX50, A0A0A9Y239, U3IDE3, H0WRW6, F7HE16, H2ZZ27, J9NRR0, W8BR59, G1KZH5, H2Q0J2, G1KIY5, A0A0A1WQA0, G3SM52, G1RXN0, G3QIA8, O75629, C1BQB2, V8P2X3, F7AWW0, W5PRG8, A0A0C9R067, A0A096MZS4, G1QCU9, V5I7U7, G3X3C2, H0ZTG0, K7ADC2, K7E3V9, A0A096N1Q8, Q5ZJ73, K7CBH9, F1PVI3, Q148D9, A0A0D9REW3, A0A034WND0, M3WW01, A0A034V9Q0, E3TG05,…	Protein CREG1	InterPro
CYYR1	-4.37	UniProtKB	Q96J86	Cysteine and tyrosine-rich protein 1	UniProt
LOC101926646	-4.37
LOC102130270	-4.37
CLEC7A	-4.36	UniProtKB	Q2A6Z5, F7HQS4, A0FEV9, A0A096MPT5, F7BWL9, F7HQS8, F6WMB3, F5AXZ1, F5AXZ2, F5AXZ3, D1LYF4, W5QIN1, G3SSM1, D1LYF5, A0A076KRW7, Q8HZR8, G1QSE2, D1LYF8, D1LYF9, G1LB36, F5AXY9, G1TCE4, F7HR03, F1N2F3, D1LYF2, D1LYF3, M3XEX5, D1LYG1, G1P8P5, A0A076KRJ4, E2RFU8, H2NGH4, M3Y4U3, F6TUN1, Q49BZ4, H2Q5F2, Q9BXN2, A0A024RAN9, F1SPE2, H0VKC5, G3QPB4, H0WHC1	C-type lectin domain family 7, member A, isoform CRA_b	UniProt
SLC11A1	-4.36	UniProtKB	H3AGE7, A0A024R474, H9F5E8, W5QE37, U3RCQ9, F6WFG3, J9NSD7, G9KP23, G3U5A7, U3RA67, G3RC10, Q9HBK0, V8PBF3, H2QJE7, Q27981, A6XMW1, G1KA06, U3REZ8, G3SNT2, G1RBA4, F7GRK1, P51027, U3RA97, U3RA59, G1TAR1, Q27946, K7G7T9, F1P9P2, H3CB53, G3RSZ2, P56436, F1MJ63, Q0V8H1, A0A0A9Z4S4, P49280, G1L8L5, A4ZDG6, A4ZDG7, H2P8K7, B2KKJ6, O77741, B2KKJ7, H0Z4L7, A0A096N2F1, I3M4I8, U3IUE1, F7EXY8, Q9XT74, M3V…	Solute carrier family 11 (Proton-coupled divalent metal ion transporters), member 1, isoform CRA_b	Ensembl
ITGA1	-4.33	UniProtKB	H9FGN1, I3MZZ0, K7GS51, E1C0V6, W5U6W8, G3RPX8, G1RJ15, F1MMN6, U3K853, G1T169, K7FBR7, G1KCR0, H9FKV7, H0VP97, K7GN37, G3TED5, F6SHD8, P56199, F7GLS1, U3B3F6, H2ZXD1, H0XH09, F1PP33, F6TJG3, F6RXG9, H0YW08, G1PKI8, F7AR09, F1N8Z0, A0A0D9RVX2, A0A096MMV7, Q90615, M3YSF0, F7GLR6, H2PFI5, G3SHQ5, F7GLR9, F1SMF6, W5PEN0, F7HXE3, H2QQV5, I3MFR8, H2QQV4, Q15EW4, G1MXJ9, F7HXE6, U3J0Y2, G1LMC5, J9NUT8,…	Uncharacterized protein	Ensembl
ZBTB7C	-4.33	UniProtKB	G1KUM6, B2RG49, E1BJM6, H2QEI0, A1YPR0, G3RQ18, I3JLM6, M3ZPU4, G1TZ66, K7FGG2, G1DFW1, H3A8B7, W5P0H7, W5P0H8, H2NWB3, A0A0A9ZHY7, F7HTG9, H2LMI9, M3WQ24, E2R2B8, F7H8C9, A0A096M9G9, H3DN44, I3MHT8, H0YP31, F7GKW2, H2TMJ0, F7C8X2, F6PRH4, A0A096MG92, A0A087XU70, H2TMI8, H2TMI9, M3XP44, G1MRJ2, U3K2S3, G1MRJ3, G3SSD5, G3UEA6, G3PW18, G3WLR5, V8NIH3, G3WLR6, A0A096NDG9, H0WGF3, I2CWM2, E1C395, W5L…	Uncharacterized protein	InterPro
ARHGAP5	-4.31	UniProtKB	E2RED4, A0A0A0MSK6, H3ASM3, F7D700, H2ZWB1, G1QBA3, U3JTM7, F6X1M4, G3T9B0, Q13017, H2NKZ7, G3SDW0, K7GD67, G3VFU5, F6Q8Z8, E1BM23, G1TTL2, R0JPI8, G1MB50, G3UBM8, A0A096MNH2, G3QJG0, H0VAW4, M3X4J4, G3U0U8, M3XPP9, Q4G3Y9, F6XPA6, F1NG56, G1KB56, F6YB11, F7AID9, G3V360, F6YTW3, G1QSC8, H2R9D6, A0A0D9RT13, H0ZNT7, U3C9T9, D2H9M0, W5P8Y5, M3X5T2, I3NDQ5, F7AH39, H0XUY4, G1NIK0, F7GRE8	Uncharacterized protein	Ensembl
KBTBD11	-4.29	UniProtKB	Q9CUY6, Q8BNW9	Kelch repeat and BTB domain-containing protein 11	MGI
ENC1	-4.28	UniProtKB	B2WUL9, A0A0A7UXE3, B2WUL8, B2WUL7, B2WUL6, B2WUL5, B2WUL4, A0A0A7UXE6, B2WUL3, B2WUL2, B2WUL1, B2WUL0, F6JXD9, F6JXD8, F6JXD7, F6JXD6, B2WUK9, B2WUK6, B2WUK5, B2WUK8, B2WUK7, B2WUK2, F6JXD0, B2WUK1, A0A0A7UXD7, F6JXD1, B2WUK4, B2WUK3, F6JXD4, F6JXD5, B2WUK0, F6JXD2, F6JXD3, B2WUJ7, B2WUJ9, B2WUJ8, S4SWX2, U3R9V5, U3R9V1, N0A094, K9NYX2, U3R9U0, U3R9U2, U3R9U6, K9NYX7, A0A0A7UXI6, K9NYW4, A0A0A7U…	Ectodermal-neural cortex	InterPro
LOC102143922	-4.27
FRMD5	-4.26	UniProtKB	A0A096NLX9, H0Y5N1, B0KWG6, W5PPC5, F7EL54, K7CUE2, C1FY55, F7G8Z0, A0A0D9RAY5, B5MC67, B2KIQ5, F7G8Q1, F1SN02, E1C499, K7ETN0, H0YKW6, K7FPF2, A0A096NLY0, G1SDT2, M3YGW4, W8B6G4, I3MZW2, U3II96, Q7Z6J6, F1P7P5, G3U9S4, G3WPV5, G1ND43, G3WPV6, B7NZF7, H0YNI9, G1M9H1, G1P381, G3SZW2, G3RLI5, B5SNK2, W5NBM0, G1R0G4, I3M8Y9, F7C4V5, H0V7L9, U3K8S8, F7E2B0, H3AFL8, U6DME3, F8WCI0, B3RF15, U3E038, W5L…	Uncharacterized protein	InterPro
FBLN5	-4.24	UniProtKB	U3JI68, G3TEP6, U3AX53, G1KIX9, Q5EA62, F6SRH3, G3SEY7, A0A024R6G3, H9F0Y8, U3IC96, F6RCC1, F6RBV6, F6T7F1, G1NKA4, H2Q8S8, F1SD87, H0WYT3, G3XA98, Q2KJ89, W5PSC8, I3MQ32, G1M8Q7, M3Y8S3, M3WFS9, G1T4W4, E1C1G8, A0A096NUF7, H2NM18, Q9UBX5, F6V301, G3QP09, Q5RC26, F6TXU0, G1S5I8, A0A0A9W5C3, V8NU92, H3BIA8, G1PIM7, H0ZQN6, G3V4U0, F1PJM1, A0A0D9RG07, K7DKI2, H0V6Y0, F6V2Y9, K7G7G9, F6RCJ6, H9FJD2,…	Fibulin 5, isoform CRA_b	Ensembl
LOC102142550	-4.24
FZD1	-4.23	UniProtKB	O57328, H2PMY3, U3IFV9, A0A087YQ58, M4B0V5, G3QDV3, U6DIG8, F7E9U1, H3AZ03, F1NGQ9, B0VXE9, G1QE18, C1L3T3, H9FCA0, G1SJB2, G1TUT1, W5MX40, M3Z5S6, G3U8W9, I3KYA1, U3CPV9, K7C2E9, U3CSJ9, H9FM65, Q59UH0, F7D747, G1SC52, F1PCN5, M3X4M3, H0YT73, G3X219, B0VXL8, A7MB15, I3ML35, K7BSB9, B3EX09, Q59UM3, F7H7V5, B0CM30, H0XLY2, I2CXQ4, D2HY60, C0RW23, G1KRK4, W5Q571, H2R570, G3PMA2, A0A0D9SCP4, U3E710,…	Uncharacterized protein	InterPro
SPRY1	-4.23	UniProtKB	U3K0G2, Q1L0X2, G1Q949, Q9PTL1, F6QFL8, F1RRA2, E2RCW1, A6QLQ1, F7HQJ0, M3WJ12, F7GQV4, G1NRJ8, G1T8D0, D6REX7, H9F086, G3QW54, G9KR05, K7EY63, F7BIJ3, W5UC43, H2QQ50, A5D992, A4LA71, V8P7G6, A0A096NGC7, G3VYZ1, H0V3N9, I3N8B2, O43609, R0LRC7, H2PE98, G3TXC3, D6RHD2, H3B6I0, G1KLF2, H0YUX8, H0XQP1, G1RE68, D2HE99, W5Q6K1, A0A0D9S9S0	Uncharacterized protein	Ensembl
SYT7	-4.23	UniProtKB	F5H126, U3F0K3, H9GPK2, M3WJA6, F1N4J4, M3YRT3, G3WGW4, F7BXX8, G3T7P2, T2MIM6, F5H1N2, G1N011, I3LEZ0, O43581, A0A096MPA7, W5PUJ6, U3DN14, K7GA91, G3UCJ2, F6U816, H0Z838, V8PEJ9, F7EV46, A0A024R520, A0A0B2VMU8, G1THD6, H0XR59, G3RLD3, F6TK48, F1Q293, F5GZC2, F1Q291, F5H8G7, H2ND77, F7CKY5, U3IGK1, F5H6C1, H3AMZ7, G1MDY9, G3NPG7, F5GX00, U3KBM3, A0A0D9R290, G1P2Y3, G1QQN7, G3RUH1, H0VYJ1, H2R5D3,…	Synaptotagmin VII, isoform CRA_b	GOC
FGD5	-4.2	UniProtKB	U3KGX9, H0ZK25, F6XFZ4, F7AE36, G3QG97, A1L566, F7HES7, H2QM43, H7C0G2, A3KMQ0, J9NYS2, G1NDC8, B7ZM68, U3IK36, F6RZS2, W5Q8Q4, H0X8S0, M3X787, A0A0D9RA37, H2P9C2, I3M5P6, H0VN35, F6X0H0, G1PF24, E6ZFW9, F7AE47, H3ACZ1, K7FP70, F1PLT6, F1SPI5, M3Z0N0, G3WV35, F6WUL6, F1MUW3, F7I7Z0, E1BQN2, U6D217, G1QZA6, G3T5Q3, G1SS38, A0A096MM21, Q6ZNL6, G1LRP0	Uncharacterized protein	InterPro
PLS3	-4.2	UniProtKB	T2MHE6, H7C4N2, F1MSB7, K7GPC4, G1RXB0, K7GQL0, G3W4P2, K7GMS2, G3W4P1, U3KQI3, F1RWT2, F7ATT0, F6TBC6, U3IUG2, K7GPW9, H2QZ12, K7EUS3, W5UTB0, U3DM73, G3TSA2, G1P4P1, F7GYM9, A7E3Q8, H3AG19, P13797, Q2KJ75, F6V234, U3F7A0, G1MUJ6, A0A0A9Z8G6, G1TRY5, H2PWJ5, W5Q6H1, F7AGA5, G3TI56, H0YY05, F7FSA3, U3JGI2, K7GQS5, O88818, V8PDE6, G3U2G1, G1L6D8, G1L6D9, F7H9X0, F7GZJ3, Q5ZI39, F6XCT3, A0A0A0MSQ0,…	Plastin-3	UniProt
LOC102138752	-4.19
AOC3	-4.15	UniProtKB	U3D489, W5NUW3, E2RFB7, G3TBX2, H2R9Q9, K7EIK5, A0A0D9S1F2, F7DLT3, F7GFH7, Q5R9I0, E1BD43, G3WGW5, Q9LS01, H2NTY2, I3MJI9, V8NBM8, K7CA47, G3QY92, H0VLQ1, A0A0D3E7X4, U3B619, A0A096P5W1, A0A096P5W2, K7EL47, V8N6Q6, F2QTE6, F7GP66, U3JDB5, F1S1G8, F6KBT3, E1BC10, E2RFC0, F7GFF9, K7B9S9, A8I3P4, G1RMG5, Q9TTK6, M3WIA6, U3E7S7, G3MX04, U6CW97, Q16853, K7EQZ5	Amine oxidase	Ensembl
CD300A	-4.13	UniProtKB	H2NUM0, A0A096N5I2, G1QPG4, Q9UGN4, F7GPC4, H2QZD3, G3QKI7, K7ARH1	Uncharacterized protein	Ensembl
HYAL2	-4.12	UniProtKB	F1SPN8, H0V507, Q8SQG7, Q8SQG8, G3TYG2, F7FU16, F6Y407, G1MRQ0, H3BE87, Q5ZF00, M3YNR0, F6SZA5, H2R4F6, U3K2Z2, H9KZ20, C9K016, A0A096N541, C9JBF5, M3W6X6, H9F5Q3, H0Z2I5, G3T6H9, B5X3F4, G3QW01, B5X3R6, C9JSD1, E2R560, G1R5P7, Q6J2L1, H0XRA8, G1KI33, G3X356, F7HIH6, A0A024R300, V8PHI0, G1LZ00, K7FM65, Q58D43, B5X0T6, F7H9X1, G1SNI8, U3J789, C9J700, F6Y419, B5LZ28, H2PAN9, I3MR46, G1NXY9, J7H565,…	Hyaluronidase	InterPro
MSR1	-4.12	UniProtKB	A0A023ZHT3, A0A0D4ICQ0, P21758, P21757, C5IRD6, A0A0D4I1Y6, A0A0D4IP84, W5PIQ6, A0A0D4IVF2, A0A0D4I010, A0A0D4RS62, M3YJE4, A0A096NFA9, S4R863, G3WRD1, F6QNH5, A0A0D4ILH6, A0A0D4I5X0, A0A0D4J4R7, G3THZ8, A0A0D4I6B8, A0A0D4HX34, A0A0D4I490, F7AFI3, A0A0D4IFD2, A0A0D4HU10, A0A0D4IY82, A0A0D4S744, C7GWV5, A0A0D9RW60, A0A0D4I0J5, A0A0D4IWI8, F7AXL9, A0A0D4I9E1, H0W5Z1, Q05585, F7AFK3, A0A0D4RXN3, A0A…	Msr1p	InterPro
C1H1orf115	-4.1
EPDR1	-4.08	UniProtKB	F1NFU4, G3QDT4, Q9UM22, Q9N0C7, H0VGT2, C1BK58, G1TAF5, H0XSY8, H0Z5E2, H2QUG1, I3NF76, F6PI86, D6RIH7, G1QQL3, K7BRX6, F7I8Z1, A0A096NQX5, A0A0D9RRF1, G3WZI5, V8N7A6, U3DYH2, G1KU93, K7GFS4, F6QBJ2, G3T039, H2PMC1, G1NHA8, F7I8Z2, W5PGR8, J9P7U0, U3JJK3, M3WWN2, I3LRH5, R0L9P2, H3AA94, A6QLI0, M3Z3F8, G1P1W0	Uncharacterized protein	InterPro
LOC102128795	-4.08
MYCT1	-4.07	UniProtKB	Q8N699	Myc target protein 1	UniProt
ITGAD	-4.06	UniProtKB	G3QTG6, I3M1Y4, G1Q8R3, M3WAH9, H2QB04, F7CSW8, G3WMV8, F7C197, G3WMV9, W5PHL7, G1S2R4, G1ST26, H2NRZ8, A6QQ97, F1P793, H0WKJ3, F1Q1L9, F1N6B8, M3YIW3, H3A0Z4, Q13349, I3NER3	ITGAD protein	InterPro
LIFR	-4.06	UniProtKB	H2PFD9, U3CQC8, V8P549, H2QQS8, F7HXQ4, G1LJ11, M3YTT6, U6CQ22, U3JH67, K7GME9, F1NN90, G1PRD4, H9FUB6, F7G7B6, A0A0D9RWP1, H9GFT3, Q5XNR9, F6R917, A0A096NC05, H0UUR9, A0A060IN23, M3WPH0, H0YV67, F6WDY0, G3T306, F1SN78, U3IIJ1, E1BAT3, G3RGA6, G1SJH5, U3C6U6, H0WJZ4, W5PJP4, H3A6T1, H3A6T2, P42702, F7I9J7, K7FMK8, I3MJF9, Q8QFQ7, F7E0D3, G3WMN4	Leukemia inhibitory factor receptor alpha	InterPro
FCER1G	-4.04	UniProtKB	Q8SPW1, E2RAM4, P30273, G1MAD2, I3M833, A0A0B4J1Q0, F7I6E6, H2N514, H2R8H6, M3YSB5, A0A096MXN4, A0A0B4J1A3, H0VT37, A0A0B4J1B5, Q07249, G3RPY3, Q9XSZ6, A0A0D9S3D6, J9NUM0, H2Q0G3, G3TZK4, G1P2R6, Q9BDR7, F6SD41, F7F5Q3	Uncharacterized protein	Ensembl
OVCH1	-4.04	UniProtKB	A0A0D9R544, G3SJF2, H3A8Q2, W8C5A4, F7AGI2, A0A096MWG8, A0A034WLV7, G3S3U0, T2MAV4, G1R0Z2, W5QE92, H2Q5N7, G3R038, A0A0C9QGF5, G3SRM6, Q7RTY7, H0YGY6, M3WZ58, G1K871, G3MX30, H2NGW6, F1SGB1, H0XV05, U3IAA2, H0YH00, F1N5F0, F1PJQ8, A0A0B2VV98, K7GGY7	Ovochymase-1	InterPro
ALDH2	-4.02	UniProtKB	I0FPY3, A0A0B5H9N6, A0A0C9QIU8, F6USH7, F1PBJ8, A0A0B5HBB3, A0A0B5HBB6, A0A0B5H9N1, U3FWQ1, Q93XI6, A0A034WB08, E1BT93, B0LUF9, A0A0B5H9M5, F7FFC2, F7FFC7, A0A088RSM5, Q9UN17, H0Z8A2, F6SL95, W5PLV2, W8CAU0, A0A0B5H3P2, F6USB4, G1SUY2, S4R3S4, P20000, J9XH82, A0A0B5HF23, Q2XQV4, H9Z6A4, A0A0B5HF10, A0A0B5GZJ5, F7HS10, A0A0B5GZJ0, A0A034V8L4, W8AIG6, V5GV15, Q5RF00, P05091, F7CEK7, G1QGJ7, R1E103,…	Aldehyde dehydrogenase, mitochondrial	InterPro
GPR153	-4.02	UniProtKB	G1PQV4, I3LGS2, G3X3E2, F6PLV9, G3X3E1, A0A096NQS6, H9FKY6, W5L4R6, H0XK82, A0A096NQB9, G1MRJ7, F1MBV0, G3R7S3, H9FHC5, F7B502, M3W5P7, H2PXW6, G1LTD8, H2N9B3, G1LTD5, K7FCW7, W5PT16, A0A0D9S8T0, K7FCW3, H0W130, G3RSW6, G3SY13, F6ZCU5, Q6NV75, G1MRK3, W5UI64, I3NHE7, U3CGW9, F7GN64, V8N7M7, G3U8S1, F1RIL9, H3BCA7, M3Y6E8, F7GN11, M3ZCC1, F7GN58, F6Q9J2, U3J712, E2R0Q1, G1TFM4, V8N6X9	Uncharacterized protein	InterPro
RAB11FIP5	-4.02	UniProtKB	H0W7N0, A0A096N5W0, F7AFE2, I3LFK8, Q9BXF6, G1NKR7, G1SE69, G1MAS7, I3MRU8, G3QRB1, G3TYI3, G1PRU0, H2QI42, G1RHE6, H0WZZ9, F7AFF0, G1TXL2, G1SE70, U3J1H9, G3VYZ7, F6RA80, F1PTR8, F7DA24, G1TW83, M3Y866, K7G6T3, E1BNE5, U3KDB4, J9NZ05, M3X9L6, H2P5U9, W5PPY9	Uncharacterized protein	Ensembl
RGS18	-4.02	UniProtKB	M3W5J3, K7F376, H2Q0T2, F6ZHJ5, H9GQ36, F6RRN8, H3AKS3, G1T1M1, U3JLB9, R0M1W7, Q9NS28, H2N4C7, U6DP33, G3RLH6, H0Y1S9, F7E058, H0V770, E1C5A6, F6WVJ8, W5PJP5, D2HZ36, E1BMB5, A0A0D9RLM5, G3VWF5, I3MYB2, G3T640, G1S8T0, G1PVW4, F1SA94, H9F644, A0A096NWS0, F7DU93, G1N186, M3XZF5, B5XDD2, B6EYN8, J9P2I5	Uncharacterized protein	Ensembl
STEAP2	-4	UniProtKB	K7DAA1, C0RW19, F7DFH6, B5MC02, R0JY43, H2PMY8, G1P922, Q6YPB2, E1BTX2, G1KRT4, G3RRS1, Q8NFT2, B6A7P9, C9JLP2, F7EH72, K7G5A6, H0XGI0, B0CM25, B3EX04, U3JZ30, G3T4M4, H0YT60, B4USU3, F7A6U0, B0VXE5, C9JHX5, G1T875, G3WY55, H2QUW4, B0VXM0, H0UUZ8, W5PQR1, E2RH63, I3MKH8, M3WNS9, D2HE08, A0JNK9, G1RYQ5, M3Z3N8, G1N8N6	Uncharacterized protein	Ensembl
CLIC5	-3.98	UniProtKB	I3N7V7, V8P6B8, U3JFK3, U3J221, A0A0D9RJD6, P35526, G1KN71, D8KWA0, G1NN87, G1LEY6, W5PLA9, G1U4F9, C1BJL3, F7E2U2, K7G821, B5X6J1, F7FVA1, F7BU10, Q53G01, F7CPV2, F1P9H6, W5PLB1, F7BCF9, E1C136, U3FIJ8, H0XB39, F1RQS2, F1MIH4, F7E2T6, G3U4J7, H2PJ83, M3WQQ5, G3RBM4, M3XHL4, H0ZSP4, F7FS55, F6XNJ3, H3B2P3, D8KVZ7, H3B2P4, G3WQG4, V8NRM2, B7STY5, W5NFR4, G1QTT1, M3YM55, E2RKS6, Q49AE1, G3SBW3, F7G…	Chloride intracellular channel protein	Ensembl
KLHDC8A	-3.96	UniProtKB	Q91XA8, Q8C939, Q8R577	Putative uncharacterized protein	MGI
LOC102131617	-3.96
RAPGEF5	-3.96	UniProtKB	U3K555, U3IUT0, H0XA38, G1KPH7, K7FP80, M3YQ85, E9PGY3, G3WJT4, F1PXW0, F7GVW4, G1LBJ4, G1NDA6, Q92565, M3WAX1, A0A096N3X6, H0UZY3, G3RLQ7, H9G2F6, W5PQG3, F7I0B8, A0A0D9RN54, H0YWX4, F7BJU7, G1LBI6, H2RC46, F1N3K6, L7N0V7, G1S4C3, I3MFF6, F7GVX4, F7HZY2, G3RYK5, F7CIQ4, F7C6M5, G1T8R9, I3NHU6, H2PMP5, H2PMP6, F1SBZ4, A8MQ07, G3TE48, H3AN84	Uncharacterized protein	InterPro
RHOC	-3.96	UniProtKB	G3UFU6, H0VRA2, H1A4J7, H2N6C5, B5X229, Q5JR08, M3Y1A4, F6PYW4, E9PLA2, Q5JR05, P08134, G3VGC4, U3JDA7, Q5JR07, Q4RW56, Q5JR06, E9PQH6, B5X8Y1, Q1RMJ6, E3TC89, G3UTX2, F2Z5K4, M3WC92, H0XTJ9, I3N6B4, H9Z1L0, A0A096MMJ0, H9FMN7, H2PZP2, G1Q0M4, Q5RCK9, R0LV28, Q9PSX7, E2RMM5, K7F772, F7ES59, B5XCR1, A0A0D9S6D4, G1KUK1, E6ZF10, V8P9H5, E3TF13, G1L9V8, G3QJU5, E9PN11, F6YJ52, G1N0A5	Uncharacterized protein	UniProt
APOL4	-3.95	UniProtKB	Q9BPW4, G3S345, F5H1P9, E9PS31, Q6ICI8, H3BYU5, G3QYF1, H2P481, A0A0D9R6V0, W5MZF7, H3D117, Q9BRG6, A0A096NJT0, B1AHJ0, F7GJ98, H2P482	Uncharacterized protein	InterPro
LOC102117980	-3.95
LOC102137816	-3.95
TNS1	-3.95	UniProtKB	G1L9E1, A1A4J4, W5QDT8, E1BNT5, G1NGF9, E7ERH1, G1R6R5, G1SGI6, A0A0D9R9F0, Q9GLM4, G3S8Z8, F6ZA44, H0XFI5, U3JMZ6, F6U920, H2P8J5, G1P9F3, A0A096NRW1, H0UW51, F6PZF5, F6VHK2, M3YYJ2, Q9HBL0, G1K8Y8, F7EK40, H2QJD8, G3SLZ9, E2RL77, M3VVY7	Uncharacterized protein	Ensembl
TCEAL4	-3.92	UniProtKB	K7CCD9, H2RDY6, F6SQZ5, H9FZZ3, H9FZZ4, Q96EI5, I2CTC2, A2RQR6, Q5R6B4, V8P413	Transcription elongation factor A (SII)-like 4 variant 1	UniProt
LOC102142775	-3.91
RTN1	-3.91	UniProtKB	A0A0D4MUU8, A0A0D4MF49, F7I1Q1, A0A023ZAI0, A0A0D4PDN3, A0A0D4Q2M2, G1SCW0, F1NH22, F7I1P8, F7I1P9, F1NH23, H0ZRZ8, U3KNI3, Q90638, Q90637, F7HG99, A0A0D4M2M7, A0A0D4R7Y3, A0A0D4NNS4, A0A0D4Q4U5, A0A0D4QIQ5, F1MQZ0, A0A0C5IRJ1, A0A0D4M3G5, A0A0D4P3P8, A0A0D4PJ77, A0A0D4NI69, A0A0D4N543, I2CYS9, Q2L7A7, I3L6J1, A0A0D4PSN1, F7D0W0, A0A0D4LVF5, F7HG96, A0A0D4MAF5, V8PHM7, A0A0D4LAS0, Q6IG14, F1Q231,…	Reticulon-like protein	UniProt
ACKR3	-3.87	UniProtKB	H0VQC7, W5NQ57, G1PIH1, F7D7T0, W5UJM4, U3I3B4, F7HZX1, H0Y2B6, M3WH59, G1NS69, K7GIC8, G1RIE0, M3XTJ7, G3QNR5, U3KL67, P25106, F7AW12, P11613, G1T081, H3D8W0, H2P913, H3B8H5, A0A0D9SBS8, F7AC75, G3WP53, H0YZL1, G1KK52, F1SM08, D2I542, G3SRP4, A0A096MKX4	Uncharacterized protein	InterPro
BCHE	-3.87	UniProtKB	U3K1Z7, H2QNP1, A0A0C6FWD8, F6UC09, M4AS84, G1KGY5, F2VR67, G3WUZ5, F2VR66, G3WUZ4, F2VR69, F2VR68, P06276, C1L3S3, O62760, O62761, P32753, P32752, K4QBF1, P32751, P32750, U3DCA5, F2VR72, F2VR71, F2VR70, G1SUE1, H0V4F8, A0A0B2VTL8, P81908, W5M723, P32749, P21927, F8WEX7, F7CC84, I3JDS7, G1QY42, A0A096N3T2, V8N3N0, F6U2K2, F7IJR4, V8NPZ5, G3M697, G5CWE4, G3M696, G5CWE3, G3M695, G5CWE6, G3M694, G5C…	Carboxylic ester hydrolase	InterPro
LOC101925487	-3.87
PPAP2B	-3.87	UniProtKB	O14495, K7BS26, A0A0D9S760, T2MJ88, G3TS74, E1C944, V8P7N4, J9NYC6, M3WKE1, F7C6J4, G1SYE3, F6WFB2, G1NG20, M3Y711, U3II89, I3NCB5, H9G166, H2R072, D2HX60, G3W7R6, F7DE83, F1S785, A0A0B2UNV5, H0XC24, H2N794, H2ZWG9, W5PD88, G1PWG5, A0A0B2UNH5, G3QDI5, Q3SZE3, U3KCN3, F7B3Z1, G1RX73, H0WCA0, H0ZGZ0, F7HLR6, A0A096N8C6, K7F716, G1K8D1	Uncharacterized protein	Ensembl
TSPAN6	-3.87	UniProtKB	H0YVQ8, O43657, K7GPG7, U3IMF4, K7GKD8, F1PMP0, K7GKV0, Q5RAS5, F7G2V8, F6UL12, G3TT38, H0V4P6, H0WQU0, K7GQH7, K7GSC1, F6T0D6, M3W038, A0A096N762, F6T835, G3VAV6, G1T0T1, G1MYM6, K7GME2, G1R7G0, K7F5Z9, K7GKW2, A0A087WYV6, H2RFW3, K7GQV4, U3JMR8, W5NW65, G1PB14, G1L609, I3MUR0, M3XTD0, Q32KU6, A0A024RCI0, E1C857, A0A087WZU5, U3DD44, F7GWP1, A0A0D9RDC9, H2QYV9, G3R3D7, I3LT73, H3B6A7, H9EV87, K7G…	Tetraspanin 6, isoform CRA_a	UniProt
PPP1R3C	-3.86	UniProtKB	H0ZDU6, G1NQY2, F6XAD6, M3WBI3, F7G593, G3R0E7, Q9UQK1, G1T8M0, U3FUJ9, H9GD62, H3ABW0, F7CCR6, J9PAD0, M3Z0L5, Q0VCR4, F1P1X1, G3U8P1, G1PYF0, K7CP68, I3MYC7, H0W532, W5Q3Y1, G3X3K1, A6P3D1, H0XDX6, K7EXS4, A0A096P5H4, U3KKW2, H2NB02, G1MKB8, A0A0D9R2Q3, R0LJ07, H2RGP1, F7BNP5, G1RPF2, F1SCX0, F7GL21	Protein phosphatase 1 regulatory subunit	UniProt
IGSF6	-3.84	UniProtKB	O95976	Immunoglobulin superfamily member 6	PINC
LOC101866918	-3.83
LOC101926847	-3.82
LOC102117076	-3.8
NAV3	-3.8	UniProtKB	Q8IVL0, M3XJ85, G3SP92, W5Q062, G1QYL8, H2R0X2, F7CVV7, F7FLL5, G1LJD5, K7FQN3, A0A0B8RZC4, F7CZL4, H0X325, H0YHA8, F7FJ89, F7CZJ2, G1NET5, U3K7B7, M3Z193, U3J4W2, G1PFX7, G3QUN7, F1PNY1, G3UIH7, G3VGB2, G3VGB1, G3VGB3, H0YI14, H2NI48, F7F856, F6URE3, G1LJE6, F7CVS8, H2NI49, K7FQQ2, H2ZVA2, H0ZB28, H0VTC6, G1SMV6, M3WIA0, E1BP55, F7FM84, F1PNX9, G1KQ75, W5Q069, I3MJQ6, A0A096MVL5, G3SIM3	Uncharacterized protein	Ensembl
LOC101865352	-3.79
SDC3	-3.79	UniProtKB	H9F5W8, W5UJI1, H3BCS6, G1MPX3, P26261, H0XNG2, U3INY9, G3TAV5, K7G669, H9G4D7, F6XHV5, F6Z7J1, O75056, M3WD58, G3U1W0, F1MP76, F1NKM5, G3RQZ1, M3YVI8, H0VXC8, V8NAM2, D3DPN2, G3WH35, H2N887, F7IG27, G1QK95, H0YRB3, U6DJR8, H0XSI8, I3MUQ2, F6Z7I2, A0A0D9S7Z6, G1P749, A0A096MT56, U3JEV1, W5NVB6, F1STL1, F1Q3P6, F6Z7A3, G1SRT7, F6XXE4, G1MH11, F7IG04, H2R2Z1, G3UNT7	Syndecan	InterPro
DNAJB4	-3.78	UniProtKB	T2M4C0, B4DNN2, A0A096MYE1, Q9UDY4, M3YH99, C9JUL4, G1RFD8, G1QE60, F6PM07, H0VH54, W5PV03, H9GBG6, F7H6B1, G1NAX8, K7G4A2, H3AYG7, G1LLK9, H2N6Z0, F1S9T0, G1T3U5, G3TQ00, H3AYG8, U3IE39, F1NKV0, F6TPQ7, I3MMQ1, G3VUS1, A0A061SEV5, G3QPW5, A0A061SA75, V8P7Y0, H9EQ05, H0Z8X4, Q5R8J8, A0A0D9S6X6, M3X3F4, H9H7N4, H2PZ99, H0XAU3, F1P9G0, A0A061RV16, Q2KIT4, A0A0B2VKB8, W5UKK0, F6W2E8, U3JTB3	DnaJ homolog subfamily B member 4	InterPro
LOC101865889	-3.76
COL4A1	-3.75	UniProtKB	M3YI93, V8PFW5, F1Q133, F7HZQ1, H0X224, F1P2R3, H9FJW8, U3ILJ6, F6VVM5, F6ZH63, P02462, U3FDJ6, M3WLC2, K7C8P4, H9FFY5, U3K7K7, G1MEQ2, G3RYA4, G3WDT4, A0A0D9RY12, H2NKA6, G3WDT5, H0ZEK9, I3M3Z8, A0A096MYP0, Q28271, H9FGC9, G3TNL4, G1NPS8, W5P813, H9FDB0, F6ZGX0, H2Q7S9, F6VPM2, G1K238, F7I211, F1RLM1, G1PXA2, M3V819, K7FHW0, G3TS62, Q7SIB2, G1KPX5, G1R8X9, H9FA23, G3RA04, H0VVV4, G1U9R7	Uncharacterized protein	Ensembl
SPRY2	-3.75	UniProtKB	H3ANF0, I3MW79, Q9PTL2, K7FTY8, G1KS17, F1NZG9, A0A096N5N3, H2Q7P2, G3WDX6, G7NJH1, R0LS41, F7FGB1, W5UAW7, F7BBA8, Q08E39, H0WNN6, Q5R959, H0ZQS4, M3W8A1, G1SXJ1, M3Z4Y7, F1RP67, Q2PFN5, G1NRA2, G3R6C2, H0VZN6, E2RGU9, V8NSH7, G1L6X9, A0A0D9SBB7, Q866R9, F6UL06, G3SP04, U3KJZ4, A0A0A0MTG9, G1S394, O43597	Uncharacterized protein	Ensembl
LOC102134097	-3.74
MMRN2	-3.73	UniProtKB	A0A096P4D3, F6SH74, G1PEY3, H0Z5P9, H0W831, E1BTB7, Q9H8L6, H0XJK3, F6Q501, E1BJW3, H9FEB4, F6ZXE5, G1LTV2, K7EV67, H2Q273, M3YBT0, G1MU63, K7FIY8, U3J2P6, G1TCN2, U3JW30, G3VQB8, G3R129, G1QQ49, M3W8Q1, L7N019, I3NHQ7, F7CK89, D2H9I5, H2NAD5, W5NRB1, F7AMZ7, G3TA55, F1Q2N8	Uncharacterized protein	Ensembl
FIGN	-3.72	UniProtKB	G3TM38, G3UAW6, B8ZZS6, G1PFD4, K7F4G5, Q5HY92, H9FJC8, J9P7G6, G1M6V6, V8PD57, U3KKF0, F1MZY6, H0Z9C3, M3XNK9, G3QL88, H2P7P0, H2RI47, F7IG31, F1PJ00, F7CBX7, F1P5Q6, H0XUF7, M3VZ37, H2QIW6, I3NHA0, G3W3S4, F6QDW8, G1NRV6, G1QQZ5, U3IUL7, F7IG09, H0W088, H9G417, W5P7F0, A0A096MVP7, F7HD85, F6WT18, G1TNR9, U6DC50, A0A0D9RSP4, I3LGW1	Uncharacterized protein	UniProt
LOC101926749	-3.71
KIRREL3	-3.68	UniProtKB	G3SPE0, M3Y5Q6, F1NNB5, G3VJ07, U3E2H0, U3DUV5, U3I4U0, G3S2G5, H2Q536, Q8IZU9, A0A0A9XSS5, F6U6K9, F1S6H0, H0VSA9, A0A096MV15, A0A088AWN7, G3VJ08, F6VPJ2, G1T3J8, H9G0U8, A0A0D9S4K0, K7D747, E9PRX9, H2NFU6, F1PPU0, A0A024R3N5, K7GH89, I3MEJ8, F6QPT7, U3JQV9, A0JN33, G1KZQ6, W5PU28, F1MX28, H0X2R5, M3WET4, F7E1V4, W5PU24, G1PXX5	Kin of IRRE like 3 (Drosophila), isoform CRA_a	UniProt
MNDA	-3.67	UniProtKB	E2QWV5, F7HER7, H2N581, F7H7T4, G1RRN8, Q05CU9, I3N161, W5PCH5, P41218, F6UV62, M3YNS5, G1LBN9, Q8SPH9, F1RND9, G3QT05, H2Q0C4, A0A096NQ09, G1U6G2	Uncharacterized protein	Ensembl
CASKIN2	-3.66	UniProtKB	Q8WXE0	Caskin-2	UniProt
LOC101867496	-3.62
RETSAT	-3.61	UniProtKB	I3MUW2, U3JBD0, E2R325, H9L0J1, G3VSI6, F6TLA0, G1TGH4, G3TGP9, H2QI89, F6R0Z1, G1L5S6, A0A096NZS5, H9GHG8, F6ZUE7, G3R0H2, W5QH00, G1P192, F7FZ20, H2P5M8, Q6NUM9, G1QLN2, F1SVB2, Q64FG0, H0YZL4, E1BDK9, K7FQQ4, U3JA25, M3YBI5, M3W085, H0WB53, H0WHU4	Uncharacterized protein	Ensembl
LOC101866835	-3.58
LOC102130549	-3.57
ARHGAP29	-3.56	UniProtKB	E2RRA9, Q52LW3, A0A0D9S6Q3, M3XGU5, F7GYN6, G3UMG0, F7BDM5, E6ZIA2, G1PMQ6, G1KDQ3, K7FKP9, G1N6K9, M3XW97, I3LWD0, H0VTF6, H2R3H8, E1C9D4, H0Z5N9, H2N6Q6, A7YY57, U3ILY3, W5Q6W2, F8VWZ8, U3D6N8, G3QIM1, F6PJM0, R4GJE2, G1SXZ8, G3T1F3, A0A096N6Q7, F7B8H0, G1RJJ0, U3JI29, F7FCN9, H3ACM5, M3WUX4, H9FI14, H0XBP0, D2H818	Uncharacterized protein	GOC
DOCK5	-3.56	UniProtKB	M3WFY2, U6DBE1, F6UKH4, U3IRQ0, G3SSK0, I3MC94, F1MJ73, G3TVN7, F6W2N5, U3K9F7, V8N7I4, G1S238, H3BAQ7, F1RJU3, H0VTK6, H9GH81, F6X550, F6S1N3, F1NUU0, F6VIH8, G1MQQ1, M3XVU5, A0A0D9RUB2, H2QVX1, Q9H7D0, H0YB14, G3VGI3, D3DSS6, G3QP98, G1TQW8, F7CH16, H0Z1Z1, F6S1Q3, K7FID4, G1P6P7, G1L152, F7H1P0, H9ESC9, B9A015, G3U713, W5PJM7, A0A096N893, G1T6P0, V8P2Z6, H0WLU5, F1PSR2, H0Y7N4, F7H599, F6WYK4	Uncharacterized protein	InterPro
FDXR	-3.55	UniProtKB	G3QLA1, E2RDC3, J3QSF9, M3W7V7, J3QQW7, K7EW30, F6XEM6, A0A0D9QX70, H9YWH2, H3ASY8, W5PQT9, F6RGD5, G1TFD8, Q58D35, Q148K8, A0A096NSR9, U3FSM7, J3QQX3, A0A0A0MTN9, G3UC75, G3X3H8, P22570, G1NAE3, W6QK70, J3KS64, M3YRR3, P08165, H2QDT5, T2MGL1, G2HIJ8, A0A0C4DGN7, U3DGW5, J3KTA3, I2CWN6, Q8MKG6, F7HAJ9, A0A0A0MTR6, A0A0C4DFN8, G1KEM6, F7D8Q1, H0W190, G1LR07, A0A0A0MSZ4, F1N6V9, U3EZK6, H0ZEV3, Q6G…	NADPH:adrenodoxin oxidoreductase, mitochondrial	UniProt
LOC101867001	-3.55
KCNT1	-3.53	UniProtKB	H0WYR9, F7A7Q2, U3JGF9, M3YK48, G3TUM6, F7H4J2, G3VQA9, F8WC49, G1N1L7, A0A0D9SFC8, Q5JUK3, C9J9Y7, G1L9S5, E2QW02, A0A0D9RT52, A0A0D9SFR1, F1RZZ8, E1BW18, K7E8R1, C9JBV2, W5P4F7, H2PU94, F7EHV8, G3TXT6, F1MUE0, H9GIV1, G3VQB0, M3WP78, U3IPJ3, I3N3P6, A0A096NRP8, G3RMA4, Q8QFV0, K7EHH7, G3QR87, C9JAX7, H0W2H8, H9FLL0, H3B6R1, H0Z7X6, K7FFS1, F1PE73, F6SRX3, G1MWB2, A0A0D9SEY3, C9JYL2	Uncharacterized protein	InterPro
LOC101925878	-3.53
LOC102117184	-3.49
WBP5	-3.49	UniProtKB	H0W2Z1, F1RYE3, H2RH34, M3X6C1, G3N0M4, H2PWC5, W5NQ78, D2HTN9, G1SK90, F7H6L2, Q9UHQ7, F7B998, G3SGY0, F6VGS7, G1Q4F8, J9NU14, A0A096N283, I3N4J1	Uncharacterized protein	Ensembl
ANKRD22	-3.48	UniProtKB	Q99LB5, Q9D3J5	Ankrd22 protein	MGI
GCA	-3.48	UniProtKB	H7C2Z6, H7BXD5, W5K3F4, H3D6X3, C9JIZ3, G1PDW8, K7FUA0, F7IN33, I0FQL4, A0A087XRW8, H3AXQ0, F6XP20, H2QIW4, F6VL00, G3T4S3, C9JV47, G1QQW8, F7B7V0, C9JWQ8, H0XUA3, Q5RAI6, P28676, W5P7P8, M3X8A6, F7B9J4, H0UWI3, W5MPF8, M4AHD5, F1N7I6, M3XNI5, A0A096NXL3, F7BK61, G3PL83, W5MPH1, A0A0D9RSR2, G3RGD3, H9GKI7, G3X196, I3M593, F1PJS2, G1LGK5, G1SIH9	Uncharacterized protein	InterPro
KCNJ10	-3.47	UniProtKB	K7EY77, A0A0D9SAL7, F6PGD3, G1T290, I3LKC8, F6V197, H2R8J3, H2LBV7, V8PDH5, P78508, A2VDQ4, U3I2A6, H2N557, H3B1J1, M3Z6Y1, Q547K1, G3TW00, F6QWP4, I3MSC3, U3JLD6, H0ZV77, M3W9S3, G1NV48, W5PBW3, H0WHC2, H0V1P2, G1RSM7, D2I3Z8, H9H217, F7FVT3, G3W9M2, Q9BXC5, A0A096MMU2	Uncharacterized protein	InterPro
LOC102138623	-3.47
TBKBP1	-3.47	UniProtKB	H9F820, H9EZA5, U3D3M6, A7MCY6, E6ZI15, E6ZI16, U3CVK9	TANK-binding kinase 1-binding protein 1	UniProt
UBXN8	-3.47	UniProtKB	M3X8B2, F7I3M7, O00124, K7AR77, F6PH09, E2QUZ8, F7HYW6, H9EX76, Q2TBH5, A0A0D9RTG9, U3BBN5, G1PVJ1, G3W3Z0, F6SZV4, F1RX67, G1SNG5, G3SYK2, A0A087WV67, G1L477, G1DG76, I3NH51, A0A096NZR3, W5PLD1, G3W3Y9, A0A087X0J2	UBX domain-containing protein 8	InterPro
ESRRG	-3.46	UniProtKB	F6QHL4, F6QPZ5, G3WA42, F1SA88, H2R2K0, M3XCZ0, P62508, K7FDF3, H0XBZ1, U3ICB1, G3SZB9, G1RVM3, G1NAZ5, F7AMC1, J9NWD9, F6T8Y5, A0A096NEC2, E2R7U1, A0A0D9RT24, G1KEF6, I3MDN3, G3R425, Q5UKY7, H9FAD1, F6R995, Q5RAM2, G3R430, G1P3R9, K7FDG5, H2N3Q0, U3KCN2, F6QI06, E1BC39, H0YXC7, V8N6G3, C9JU32, F7IGB3, G3TQM6, H0VBZ8, M3XYV0, F7HEF6, G1L390, G1SEH2, W5PNX1	Uncharacterized protein	Ensembl
LOC101867063	-3.46
AXL	-3.45	UniProtKB	H2NYX2, W5PCC1, H2UTJ0, G3R2V7, S4RDA4, G3RRQ8, W5KR81, V8N4I3, H0VBJ4, G1TC42, M3Z1T1, I3J7P0, P30530, G3UBB0, H9EZF7, W5UFE0, F6VEV4, G1LZA7, A0A087YCD8, G3PHI2, F6VEU7, M3ZUW2, H9G8C7, F7E4X5, H2UTI9, H3BEV2, F1RHA2, H2UTI8, H0X8Z9, H2UTI7, H2UTI6, K7CIC0, W5N9Z8, Q6JTJ1, V8N438, F6YZF0, V8NIV1, A0A0D3BSS8, H2QGD8, Q9ZV69, M3XFP1, G3TJ05, K7DNK2, H9F7B9, I0FHQ2, A0A0D9S0W1, A0A0A0MVB9, B2DD00,…	Receptor protein-tyrosine kinase	UniProt
LOC101925966	-3.45
LOC101925929	-3.44
SEMA3F	-3.41	UniProtKB	F6YFV8, U3IKY6, G3SXS9, A0A096MY22, H0VBQ2, G1LZW7, F6XP73, F1MGN0, U3K2F4, H2QMN2, H0WPE9, H0Z7X2, M3W6X0, Q8AXA8, F6WAB7, W5PLV9, F6RG55, F7BI43, G1MYJ4, F1SPP5, G3QZY8, G3X247, G1KI87, F7IF76, H9L251, I3MR25, G1T1R2, H2PAP9, G1R5K4, Q13275	Uncharacterized protein	Ensembl
MXRA7	-3.4	UniProtKB	P84157	Matrix-remodeling-associated protein 7	UniProt
LOC101925909	-3.38
SLC46A1	-3.35	UniProtKB	K7DDW2, I3N9A9, H9GIG8, H0Y0I5, G1STT6, H0Z6D9, G3WI47, U3JVE3, F1NJ67, F6SSR9, G1LEG4, F6SST5, G3TWR9, F6UGY6, J3QRF7, A0A096P392, H2QCH6, G9KPS5, F6QTF6, F7IQE2, A0A0D9R4M4, W5QA74, Q96NT5, I3LB07, Q05B81, F7CTF3, M3W9I8, U3J3V3, G3R696, E2QVR2, T2M732, H0V079, F7IQD7, G1QNS7, K7GI09, H3AVS4, K7EPJ7, F7I133, H2NT33	Uncharacterized protein	InterPro
SIGLEC9	-3.32	UniProtKB	F7F292, F7A4G3, Q9Y336	Uncharacterized protein	Ensembl
GPR126	-3.31	UniProtKB	H9FID2, E1C8C2, H9FIM0, F1PBM0, D2GUS4, V8P802, A0A0B8RZJ5, K7A6I0, F6ZMR4, Q86SQ4, F1P1B2	G-protein coupled receptor 126	InterPro
LOC102142185	-3.31
SVIP	-3.31	UniProtKB	I3N4T6, U3JQE8, H0Z2G1, M3YRL3, G3RHN5, G1S829, A0A096MUV5, J9NZV1, K7DZ09, H2QZD5, Q5R6N0, F1NAF8, Q8NHG7, F7GCE0, G1M888, I3LK69, H0X5Z4, F7HSM3, F6QXV2, W5PCB3	Uncharacterized protein	Ensembl
ZNF521	-3.31	UniProtKB	J3KSZ4, W0TSK9, W0TRG9, G1M6E1, W0TSK3, G1SPM3, J3QRW6, F7D1U5, W0TT57, G3X1F0, G1M6D9, Q96K83, G1K9W7, J3KTI4, A0A096N495, G3X1E9, W5PBF6, W0TQW7, H2NW29, W0TQQ6, H0VSR2, W0TRL1, K7F3H8, A0A0D9RYY7, W0TRL9, W5PBF4, W0TUK2, H9FSM2, W0TQZ0, J3QQI2, W0TT65, W0TSY2, G3TBC0, I3MJ29, W0TQZ9, G1PDU7, W0TUL0, V8PHW5, W0TT20, U3I6W6, G3UDC8, G3RU34, W0TRM4, U3JU71, F6UAR8, M3XFS8, H3AE62, W0TUR6, A7Z030,…	Uncharacterized protein	InterPro
ACVRL1	-3.29	UniProtKB	I3LWQ1, F6S9E3, E2R174, G3V1W8, G1NVK2, D9IPD9, H3BTZ2, F6PLZ9, G3WCX6, P37023, K7GIE8, A0A096MQ05, F1SGK0, F6YCL6, K9IVI7, G3T112, H0WP57, H0YYJ6, A0A0D9R0K0, U3JBE5, H9H1J4, F7AU14, G1L4X5, A4FUX2, G3QUV9, H9L2R4, W5Q713, E7EN07, H0UWQ3, H2NHC1, F1MIW7, F7HG73, F8W0N2, M3Y8Z4, F6PVJ9, G1S7T4, F7AEY2, M3VUE2, U3FJW4, H9F5D2, G1KT96, H2Q5Y5, F6S9C0, B0I548, Q5RAN0, G1TG64	Receptor protein serine/threonine kinase	UniProt
C8H8orf4	-3.29	UniProtKB	H2QW26, F6U5Y9	Uncharacterized protein C8orf4	Ensembl
CD163	-3.29	UniProtKB	A0A0D9RBT1, S4RE54, G1SKS7, S4RE57, J9S2W9, I3LY45, G1QZT7, H0XBA1, H0YGZ7, W5NY01, W5NY03, M3YZ85, J9T3F8, J9T9K7, C9JHR8, U3F8N3, Q2VLG4, G1PMW1, J9SVJ5, F1PL59, V8N2P4, Q2VLG6, V8PFD8, A0A096MYD3, D3DUU0, H2NGC9, P85521, W5K031, D3DUU2, G3SRE6, F5GZZ9, F7AC72, F7FJX0, G1M486, G3S224, H0YFM0, F1PL60, Q86VB7, Q2VL90, H2Q5C5, M3VZG5, B7TWH2, H9FFW9, A0A0C5KHB2, A0A0B8RW09, H0V527	Uncharacterized protein	InterPro
LOC101925763	-3.29
RAPH1	-3.28	UniProtKB	W5UES9, H0XCJ8, H0VYB2, G3TEJ6, E1BX44, V5GLS8, A0A096N0P9, I3N5L2, G3W0B4, G1PAX6, A0A0D9RD55, U3JM66, M3XMV2, H2R678, A0A0A1X4K1, G1TC88, H0ZHJ3, C9K0J5, W8AHA2, G3TUA7, G1L8A4, H2LKR8, G3RJV9, H9FFY6, G1N9G7, F1SHE5, G3S2F8, F7AYG9, K7G5G3, H9FIB2, C1L4R2, F7FJL9, T2MAU8, H9G959, E2RBJ6, E1BPM7, F7FJR7, A0A034VQ56, G1M2S8, Q70E73, G1R5X5, W5QA16, H2P8C9, J9NUZ5, F7GWN7, M3WNW4, F6Y660, U3HZN4,…	Ras-associated and pleckstrin homology domains-containing protein 1	InterPro
TMEM132E	-3.28	UniProtKB	H9FIP6, V8P5Q6, Q6IEE7	Transmembrane protein 132E	UniProt
LOC101925291	-3.27
LOC102128672	-3.27
SLC50A1	-3.26	UniProtKB	M3XFN7, E1BK22, G1LXW3, Q5SR67, H3AN52, K7C4B4, W5P0N7, G1RME5, H2N5I1, U3IQ69, F6X7T4, F6X7V4, F6UKD7, M3Y2T0, H0X9W7, A0A0F6T9B8, F7BPX2, G1P1X3, A0A0D9S597, Q9BRV3, G3VYH1, U3JJW7, F1RGR5, H2Q068, Q95KW8, G3R1K4, G3SLA7, U3F7F8, G1TUV9, F7D9S0, A0A096MT12, F6X7U4, K7FSM6, H0V2U7, T2M6F9, K7GSU3, K7GQV0, I3MCC3, A0A087WXX5	Sugar transporter SWEET	InterPro
HYAL1	-3.25	UniProtKB	F7D6C8, G1SPB4, F1SPN9, C9JRK1, F7GHW7, F7HA11, F7GHW9, F7HA14, F4YE61, F4YE60, F7HA19, F2Y936, W5PIU5, A0A0B2VVM4, W5ULF9, U3D098, G1KX26, V8PFK9, F7GHW3, U3K2Z3, F4YE56, F4YE55, F4YE58, F4YE57, F4YE59, F1PSX9, U3J766, H0VTK0, F2Y5T1, F2Y5T0, F2Y5T3, M3W6X5, F2Y5T2, W5LC04, D2HES7, F6SB02, A0A0B2VVD7, A0A024R2X3, T2MEC4, H0X9V0, G3T6H5, F7CZ01, A0A087YBW8, F2Y5T5, F2Y5T4, F2Y5S3, F7D6E9, F2Y5S4,…	Hyaluronidase	InterPro
TFCP2L1	-3.25	UniProtKB	E1C1L2, G1KCS8, G1NZ34, G3WLK8, H0VJD5, G3UG22, I3MKC2, G1SRW6, H0Z2D3, H2P7B8, K7FMQ4, F7CQ65, F1PCX4, H0X612, G1NH66, F1RXX5, F7EWV8, F6SYN6, K7GPQ6, U3J7P8, E1BPT7, Q9NZI6, F6PZL7, F7G0J7, U3KFK3, M3WGE3, G1LFD7, Q5RB16, M3XPM8, G3RZF0, W5PUC9, A0A096MZ20, H2QIN0	Uncharacterized protein	Ensembl
LOC101867479	-3.24
LOC101866453	-3.23
PDGFRA	-3.23	UniProtKB	F6VUV9, G3PMK7, G3PMK6, M3WAV8, P16234, W5K576, G3T6A2, F6V0P7, A0A087YIB4, H3BZA2, W5QCN3, W5QCN4, A0A0D9QY70, Q6RXL2, K7DT04, H0X762, G3R4Z2, H0ZBR5, A7E3B9, K7FH47, G1NH32, G1SCX7, F1MX49, G7MTB0, H3AL18, U3I744, V8ND52, F1PUX6, G1RA35, B5KLP2, G1P7Q7, I3MH41, H2PDE4, M3Y370, F7E5I9, H3DJW1, G1MJ75, H0VJZ3, W5N9Y7, F7A2X2, F1N870, U3JLD9, A0A096N3T8, Q6E7G6, Q0PW86, G3WJ82, F6SLY4, F6VUA7, H2M…	Receptor protein-tyrosine kinase	UniProt
CD244	-3.22	UniProtKB	R4GLA4, G3VKD5, H0UY17, G1MB08, A0A0D9S3J9, F7HDM5, F7HDM4, M3YRV6, A0A096MT86, U6DTK2, M3W156, F6V9S0, H2N534, G3QS67, F7B7X4, G1T5P7, I3MM83, K7E2C8, H2R3Q9, U3DBJ2, G1RU44, K4L8I6, F6V9X1, F1MDT2, F1S174, H9H2G8, F1PPB5, W5PGV6, Q9BZW8, K7GP18, G3U7I1, H0WJ80	Uncharacterized protein	InterPro
NAIP	-3.22	UniProtKB	F7GZ38, H0XZQ1, G1QWQ7, H2R5L4, A0A096N8G8, E5RJA3, V8P6N0, E1BEJ9, H0YAX2, F6V967, I3MSN3, H2PFS5, H3AWW5, Q13075, E7EQW0, G1U8H2, H0V8W7, A0A0G2JS53, A0A0G2JNC7, F6YSF8, G1Q265, A0A0G2JQE0, B7ZLE8, G1KJP5, A0A0D9RT47, M3WR22, W5P5Z8	Uncharacterized protein	UniProt
CFH	-3.21	UniProtKB	F1S643, H2N4B3, P08603, H2Q0T8, Q28085, G1S8U4, K7GLV1, I3MPW4, F7DDF5, H0V657, G1TBS8, A0A096N3P8, E1C7P4, G1M869, H9H3P5, H0WJU6	Uncharacterized protein	Ensembl
ARMCX3	-3.2	UniProtKB	I3MCW8, Q9UH62, F6RKR8, Q5R9J3, F7GD88, G1PZV7, G1LPU0, G1SMN9, H0X106, G3S8E5, W5NUC8, L7MSJ2, F6TMP3, G3T5U9, E1BE36, M3X964, A0A096NP19, M3Z600, A0A024RCF9, H2QYX1, E2RJG1, K7GPS6, H0VJU4, K7GM67	Armadillo repeat containing, X-linked 3, isoform CRA_a	Ensembl
ZNF462	-3.2	UniProtKB	W5LG04, H0WJ07, A0A087XX16, W5PBC2, A0A096LSQ0, E2R531, U3JJP7, G1N713, F6TW63, H9FJJ3, G3S4M6, M3W1T5, H0Z7I5, G3PW60, F7H0U2, G3ULI6, H2TDW4, A0A096MI35, H0V5P7, H2PSZ0, G1S688, H3BLX4, H2TDW5, H2TDW6, K7EVS1, H3DN09, I3LK81, U3B8G6, H2LLU2, G3R0K4, A0A096P0Y6, W5MV01, G3T966, F1MIB3, E1C5J4, G1MF50, F7IRY7, Q96JM2, G1T3L7, H2QXN1, G1MF44, G1PI35, F6UL46, F7ICL4, U3IZR7, A0A0A1WTT5, G3W263, I3K…	Uncharacterized protein	InterPro
FRMD4B	-3.19	UniProtKB	U3KG00, C9JAW0, G1NB47, V8PAG8, F1N8M7, F1MMR2, Q9Y2L6, F7GXW1, F7GXN9, U3IYK6, W5PJL4, G1P4U8, F7FAI3, G1SIK1, F1PXZ6, F7EX24, M3WAN0, Q6PEW6, F1SFP5, A6QPQ3, C9JYK2, F6YIG9, F6X616, H0WLA9, E6ZFM8, C9JA15, M3YZV4, Q3YAM0, G3WL26, G1LU62, H3AZ51, G3SNK2, K7GGD5, H2PAA4, G1KR48, H7C550, H0ZHT4, A0A0D9RGS5, F7GXU3, G1QPF6, C9J7M5, A0A096NCA0, F7HKM7, H2RC13, C9J6Q2, F7HKM1, F7EX19, G3QIE2	Uncharacterized protein	Ensembl
GNG12	-3.19	UniProtKB	B5KFK3, H0WQB2, W5PP04, M3WGW2, M3Y070, G3VHM9, G1NHD9, F7E106, G3RJN3, G1Q056, Q9UBI6, R4GFT9, F6W548, G1RDI0, H0WBP3, Q28024, Q4SSJ9, G1TUD2, I3M4C6, U3KEP4, G3SS00, W5LBZ9, Q5RBQ0, A0A096MYI1, H2QZN8, B9TRW9, A0A0D9S711, D2HIA1, K7FE99, F6SSS3, F7BGR9, G1PGR9, J9P702, R0JDP4, F1SEX7, H2ZSM5	Guanine nucleotide-binding protein subunit gamma	InterPro
PTP4A3	-3.19	UniProtKB	G1NJY0, F6SUC7, F6RLU0, F1NXK8, H2PRA8, F6T1U3, M3WKE9, F6RLL8, F6X4H9, I3NCQ3, R0K0F9, H0ZR30, E2RFP6, A2VDT1, M4AV24, A0A087XW89, H2QWS4, U3JD41, O75365, A0A096MTG4, H9F9Y0, G3SXR7, G1TRA7, H0ZZJ1, H0XA48, Q4SH75, F6T1T5, G1L425, U3BXI5, W5NXG5, K7FLS5, K7ARF1, H0V361, A0A087XW51, A0A0D9RAZ5, G3NV75, V8NCE0, G3R4X6, M3XS83, G1K8Q4, K7E8J5, G1QLV7, H0ZZJ5, A0A096LVR1, G3WVI0	Uncharacterized protein	InterPro
WT1	-3.19	UniProtKB	U4MHY5, G3MWM8, I3MXC0, F6YUN9, U3IDS1, F7HMU9, I0J0J2, H0Y3F0, G3RQ97, I0FUW8, P50902, I0FUW7, I0FUW6, G1KAV9, O62651, F1SGQ9, M3VUI1, F7HMT6, G1Q8V3, G3SXM9, H0WVN1, V9GZX5, F6W139, Q9TSS7, W5S707, O93433, F6W133, P19544, H3B9M8, K7EVK2, W5Q499, F7HMJ9, K7G529, F6YS87, A9XK31, O18782, A9XK32, A9XK33, H0Z3A3, A9XK34, A9XK35, B2BR30, A9XK36, B2BR31, G3WYK6, A9XK37, B2BR32, I3L5W6, P49953, F6YS80,…	Uncharacterized protein	Ensembl
LOC102135697	-3.18
TCF7L2	-3.18	UniProtKB	U3JHU5, G3WYE9, F6WN21, G3WYE8, H3B7G1, H0UXV5, H2Q2K9, H0XBA8, H0ZKM3, F6S7U6, F7IFW4, U3B2B7, C6ZRK5, A0A0D9SGH8, B5BU30, F7F8F8, W5PS10, H2NBL9, K7BIX2, K7B5X4, G3WYF0, U3BM00, A6QPK5, G1SUK3, Q9NQB0, V8NGC2, Q5VVR5, Q5VVR7, M3WPQ9, G1MA51, Q5VVR8, T2M4F7, I2CUZ8, I2CUZ9, F6X5U4, E1BYU0, G1NEN6, F1MUJ1, K7C900, A0A096N6V1, G1MA49, G1PC76, Q5JRY3, Q5JRY4, V8P060, Q5JRY5, G1U0J8, F1Q1X1, H9F7W8,…	Uncharacterized protein	Ensembl
BMP6	-3.17	UniProtKB	F1MKS4, K7FD23, G1RLU5, F1P4H2, B2KL66, B2KL65, A0A096NKT9, A0A096NKT8, H0VRC6, G3TB70, H0XYU8, G1NU47, F7H7B2, C7C1K4, Q4VBA3, Q3HV71, K7BPH2, U3KFN5, H3AMK1, H8YSF7, P22004, F7E4H6, A1L1B5, H2QS99, H2PHV7, M3XNC7, A4FU97, D0VFJ0, W5Q737, B3GEL7, I0BWK6, F6UAT4, H9FLU0, U3DI86, C7U1J8, Q4JCQ2, F7FSC0, A0A0D9R4Z2, G3QF30, K7D087, H3ARW7, H9G6X9, J9NYC1, A4FU96, G1SJP8, F7FSA8, G1MXE0, U3I7B6, E6Z…	Uncharacterized protein	Ensembl
LOC102144138	-3.17
MAGI1	-3.15	UniProtKB	F1SFS1, G1M7X3, W8BKD6, E1B7V9, W8BX08, U6DGJ7, A0A0B2VYX2, F1PK57, G3SCC1, F6Y537, G3QQJ5, F7H0E2, F6V3H6, H7C535, U3IE32, F7HE96, G3TK70, K7DRB4, W5PM45, W5PM42, M3YZS4, G3UGT3, F6XYA5, F7GYU6, I3NGJ9, E6ZFY3, H9F9E1, B6EYU6, H2QMW6, F6Y4W4, A0A0D9RH82, F7IGX9, H0ZH11, U3FPE9, H7C5T8, G3WYI4, G1M7Z3, G1NAH9, H0UXX2, K7GBX4, Q96QZ7, F6V3F8, G1SYG2, A0A087WT53, M3WB91, A0A096MRM4, U3KFT5, F7CFB3,…	Membrane-associated guanylate kinase, WW and PDZ domain-containing protein 1	UniProt
LOC101925148	-3.14
LOC102139186	-3.12
ENOSF1	-3.09	UniProtKB	H0VTN9, F7GYE2, K7FJP4, W6PV62, A0A096N2D9, G1PE38, J3QSB6, F1PSC5, F7GYE0, G3TVJ0, M3Y217, G1SVN0, F7GYD6, G3TE50, H9ZAY9, Q7L5Y1, J3QL99, F6ZR23, G1R581, G1KHZ4, I3LC92, F7D9P7, A0A0D9RYF7, H3B9I8, Q2KIA9, X6RM24, H3B9I9, W5PI45, I0FLL5, A0A0C9QSM1, H9EVK3, E6ZJ39, T2MBD9, A0A096NPK8, F6ZR35, W5PI43, G3RV50, G1LJ44, F6QL22, M3WB15, H0WMN0, H2NVZ6, H2QE69, G3R2Y7, F6TYW9, V8NUS3, F6XWZ2, I3MLD1,…	Uncharacterized protein	Ensembl
GOT1	-3.09	UniProtKB	A0A0D3WDH2, A0A0D3YIB0, A6P3C1, A0A0D3WD10, K7FDQ4, A0A0D3WK05, A0A0D3VWR8, A0A0D3WMG1, H3B1T1, A0A0D3VIK6, A0A0C4FSQ6, A0A0D3YQM5, A0A0D3Y3C3, A0A0D3WWN3, A0A0D3X9M6, F2QNZ2, A0A0D3X259, A0A0D3XZJ0, A0A0D3WR20, F1NTM7, A0A0D3WH77, I3M9X1, A0A0D3YJG1, P33097, A0A0D3VJT6, A0A0D3VX96, A0A0D3X8G1, A0A0D3XTI7, F7GSG3, A0A0D3W7B0, M3YZY0, A3LNQ9, G3WLZ6, A5A6K8, A0A0D3YNF6, A0A0D3XYG2, A0A0D3Y5H9, H2Q…	Got1p	InterPro
HS3ST3A1	-3.08	UniProtKB	V8NSM6, G3RN84, K7BWV6, G1T571, E1BNJ7, G3TMZ4, H0XHZ0, V8NY62, G1M4D1, I3MUF2, F6SM58, F1NL56, G3RXI3, F1P9J1, H0WA96, J3KSX5, H2NSS9, A0A0D9R9J8, G3U323, H2QCA9, A0A0A9XTT8, M3XWW4, G1RX13, F7IHW7, K7BCF5, M3XH41, Q9Y663, F7H338, A0A096P2Y9, U3BR48	Sulfotransferase	InterPro
LOC102138345	-3.08
RIN2	-3.07	UniProtKB	K7EAR0, W5NUW6, J9P0L3, K7D8D8, V8P5S3, F7FK17, G1L071, H2P151, U3JPW2, H0VN51, G1PUS1, J9NY33, F7GWN9, M3WKV4, G1T9G8, G3WPV3, W8QCW8, G3WPV4, F1P3K9, W5US89, E1B810, K7G4T9, Q8WYP3, A1A4T0, G1MWU2, F6T985, G1KDU4, M3XQ70, F1PXX0, G3RKT4, K7G4U3, Q8VYC8, A0A096NVP8, G1RFJ7, U3J5E1, F6VFF1, G3RNT8, H2ZUP2, G3TEM0, F6R6N9, E7EPJ1, H0ZBH6, F7FJZ0, F6XCT8, A0A0A9Y6D9, H0X508, H2QK13, A0A0D9RGB1, G3T…	Uncharacterized protein	InterPro
ACKR2	-3.06	UniProtKB	G3X8L9, H2ZSI2, F1SRE8, F7HK24, A0A0D9SBE2, G3VL70, E2RI39, H0XI23, H2R8C8, I3NBZ2, M3Z6I5, H0V6Y3, V9GYX0, G1PUN6, V9GYB7, V9GZ70, F6YY14, U3KJW6, O00590, W5MSX2, M3VXI6, F1P1U9, V9GYM0, G3U7G7, K7F405, F1MV88, A0A096MKV6, G1TG81, G3UTL6, U3HYP1, G1SA86, H2PB19, G1MLW0	Uncharacterized protein	UniProt
LOC101865168	-3.06
MEFV	-3.06	UniProtKB	A0A0D9RCI4, F5H2E5, Q95N30, Q95N31, F5H6N9, C5IR75, C5IR76, C5IQZ3, J9P5L2, M4AYJ6, G3T690, G3WV84, W5KWQ2, G1RET0, Q95N29, O15553, D2DTW2, G3SJ30, C5IQR3, K4HMS1, C5IR30, H0VFD0, Q95N41, Q95N42, Q95N40, K4HMT9, F5GZV9, H0XYM4, G1SMW1, H9FD16, H2NPY1, Q95N39, F7DTD6, Q95N38, Q95N37, K4HMT1, U6CY41, Q95N36, K4HMT0, Q95N35, E1B7P5, F5H595, Q95N34, Q95N33, Q95N32, Q95N45, Q95N46, Q95N43, H2QAF9, Q95…	Pyrin	InterPro
C2H3orf58	-3.03	UniProtKB	F7HNR0	Golgi protein GoPro49 isoform a	Ensembl
ABCB4	-3	UniProtKB	A7J1Q5, A7J1Q4, A7J1Q7, A7J1Q6, A7J1Q9, A7J1Q8, A7K6Y6, U3DPK2, I3M3R7, W5PWJ6, U3I5L6, V5N6U4, A7J1R0, A7J1R1, A7J1R2, G3WTH8, A7J1R3, A7J1R4, A7J1R8, A7J1R7, F0ZW15, G3TGB0, A7J1R6, A7J1R5, H0XA28, A7J1R9, A8HT68, F1PH11, F6TAU5, A8HT72, G1T8G4, A7J1S0, A7J1S1, P21439, D7PC82, A7J1S4, A7J1S5, A7J1S2, A7J1S3, O80725, P23174, G1RY85, M3Z3M8, H0YT18, E7EQI1, Q6PJ81, Q4G0Q4, H2PN00, H2R3D1, Q75MQ5,…	Variant ATP-binding cassette sub-family B member 4	InterPro
LOC101867173	-2.99
HGF	-2.98	UniProtKB	Q9N1B8, H0WTA2, E5RLR1, F7A5G3, I3M1N9, G1N219, F6ZWI6, U3K7I1, F7FSH7, H0UU59, Q9BGN9, U3I6X0, H0YWJ9, Q76BS1, C9E9X4, C9E9X5, C9E9X6, W5UH86, A0A096MR85, V8NW71, Q91402, F6Y0F0, F1MZD6, R4GD12, W5Q5H9, G1MDT1, H2PN16, G3QLL7, H2QUU8, G1SFS6, K7GIU8, H3BG68, G3WT27, F1P5F4, M3XKU7, P14210, G1RXL8, K7BAC9, F1SB93, M3Z3L5, G1KNL2, G1Q6A3, U6CR68, K7GIX3, A0A0D9RHM4, I3NCK8, M3ZBA9, Q867B7, Q9BH09,…	Uncharacterized protein	InterPro
LOC102133813	-2.98
DUSP3	-2.97	UniProtKB	Q5RD73, M3YE25, H2RGU9, I3LCX3, F7BEQ4, F7C5I2, R4GM93, A7YY43, W5P7E8, H2RGD0, G1R137, G3SGS9, J9P5Y9, F6RIF2, V8P155, B5BUI8, H0WBL0, F6QXM6, G1MTU3, P51452, A0A0D9S155, G3VW43, K7ES89, H3ARP7, G1P5Y9, U3CTF1, K7ELG5, G3TGV0, K7FFF3, U3EZI1, G1KD57, A0A096P164, G1TAT4, U3JDK1, I3MLP6, Q2T9T7, G1MJ09, H0YXK5, U3I4K4, E6ZI01, H0Y271, F7BA17	Uncharacterized protein	Ensembl
PCSK6	-2.97	UniProtKB	F6QW48, A0A024RCD0, H2NPC4, H2R439, F7I2U5, F7H765, F7I2U2, H0YMW5, W5K5N1, H0V652, W5N9R2, M3YHS8, A0A087WY68, G3VXH4, G3VXH5, A0A096NNG6, U3ICE9, P29122, F1PUS1, F1PUS5, H9F7P5, A0A0B2VVN7, H7BXT3, G1L8J4, I3MCW2, G1Q9D4, H0YKZ4, H2N190, I3L8I1, M3WIS1, F7H767, G3R0S7, H0WNK3, A0A0A8WJK9, G1QI63, G3T9T1, G1PZP8, W5Q5A5, F1MCT1, W5Q5A4, H3BFU4, F7I9Y5, K7G5Q1, A0A0D9RW96, W5N9Q8, H9F7B7, G1TMW6,…	Proprotein convertase subtilisin/kexin type 6, isoform CRA_g	InterPro
TEF	-2.97	UniProtKB	A0A0B5H138, V9P8Y4, A0A0F6P248, V9P8Y3, A0A089VRP0, C1C117, W0LZ26, W0C354, V9P8Y0, A0A0B5H132, A0A067YJV7, F6QIR1, A0A067YK76, A0A0C5AJN4, A0A0C5QBI9, V9P8Y9, V9P8Y8, V9P8Y7, V9P8Y6, A0A0C5AJM9, A0A0C5AJM5, X2EXK1, A0A089NA71, A0A0F6P242, A0A0B5H149, V9P8Z0, A0A0F6T495, V9P8Z1, A0A0B5H144, A0A0C5AJM2, A0A0B5H3B8, A0A067YK87, A0A067YJW1, A0A0C5AJL7, A0A0C5AJL4, A0A0F7KPJ1, T1T5H6, A0A0B5H6B9, A0A…	Translation elongation factor 1-alpha	UniProt
CDH3	-2.96	UniProtKB	F7EGB5, G1P2Z5, W5NZS6, J3QL41, J3QR60, H0VE04, H9Z3W5, K7GFV9, G3W9L0, H9FDW9, O18926, P22223, G1LMM1, G1QZQ9, A0A096NFR1, U3JK13, M3Y6P7, M3VVY0, I3M769, E1BGT1, G1N8T9, H2QBE4, G3QD40, F1NUS5, G1TKP1, F6ZLP0, F6Z621, F1PAA3, U3AT58, H2NRB4, F6TMH9, H2NRB5, H9FJM4, G3SYS1, P19535, K7DB48, H0X0U7, A0A0D9QVQ9, G3W9K9, F6ZMA4	Uncharacterized protein	Ensembl
ITGA11	-2.96	UniProtKB	H0VMG2, F7BRE8, G3VRC8, M3XMB8, G3VRC7, H2Q9P5, F1P736, F1N157, G1M676, H0ZH88, G3TKY6, Q15EV6, F6VWM7, G3RBD4, F1SJH1, F7C5G1, U3DRI7, F6XG33, H2NNL3, W5UIN8, H9GH79, H0XAL5, F1PQ45, A0A096NMG8, A0A0D9RM25, G1PCQ7, U3I7L8, W5UJ85, K7G307, F7B901, H3B732, Q9UKX5, W5QAW8, U3K6D6, M3W607, W5QAW2, E1C311, G1RSB7, G1TEB0, F7GNK9, F7DNG1, G1NCK1	Uncharacterized protein	Ensembl
SLC30A1	-2.96	UniProtKB	G3THI1, H3AV21, J9P6Y7, K7FSF9, I3N6M9, A0A0D9RS64, U3KDD1, G1CFN0, M3X6U9, G1CFN1, G1CFN2, V8P1W2, K7CV20, F2Y8J2, F2Y8J1, F2Y8J0, F2Y8J6, F2Y8J5, F2Y8J4, F2Y8J3, F2Y8J8, F2Y8J7, Q96KD7, K6Z8T5, B9TWD0, K4GE55, B9TWD1, K4GE52, K4GLU5, K4GLU6, K4GLU3, K4GLU4, B9TWD8, B9TWD9, B9TWD6, B9TWD7, K4GE58, B9TWD4, B9TWD5, B9TWD2, B9TWD3, K4GIW2, B9TWC9, K4GIW7, H9F6D6, K4GIW4, K4GIW9, K4GE63, K4GE66, B9T…	Solute carrier family 30 (Zinc transporter), member 1	InterPro
TLR3	-2.96	UniProtKB	E9KMC9, E9KMC8, B4UUN2, A0A0A7LYQ2, S5Q0S3, S5PP45, A0A0A7LYQ5, W8CY41, W8CXS1, F1NG27, F7E2D3, F1KBP9, A0A0A7LYB8, A0A0A7LYB2, Q56GY7, S5PHY9, W8CXS7, S5PH40, D6R3C9, S5PL43, D6R3C8, G1PKT6, E9KMD2, D7F041, M4WKC7, E9KMD0, E9KMD1, G3W1A7, S5Q157, W8CY32, D6R3D0, A0A0A7M2R0, H0Z936, W8CY31, S5PHV0, I6P4J6, A0A0B5KTX8, U3LT59, W8CXR9, A0A0A7M2R7, W8CY34, W8CXR5, A0A0A7M2R3, Q56GZ7, A0A0A7M2P9, R0M…	Uncharacterized protein	InterPro
LOC101925038	-2.95
PLD1	-2.94	UniProtKB	U3K1D4, F7AQD4, R9UMA2, K7E8W9, H0VUA8, M3Z0D2, A0A034VDU8, F7INX7, J9P1D8, G3SKY1, H2PC00, V8NT45, P93400, E1BVP2, Q59TT3, V8NAX4, G3QXY7, G3VZC2, O04865, A0A0C9QG55, U6DMC9, O08684, A0A0D9RK06, C9IY79, Q13393, U3IXR6, G1KSE7, H3AJT7, F7AHN4, Q59TX2, F7FFD2, F6UEW8, I3MF06, F1SH14, A0A096N778, G1R095, Q70EW5, H0VHI8, G1T6Q4, F7FFG3, K7CMW0, B2KNE6, M3W750, Q43007, Q41142, H0ZKT4, Q877A5, G1P096,…	Phospholipase D1	InterPro
LOC102126589	-2.93
LOC102141548	-2.93
ISM1	-2.92	UniProtKB	A0A0D4ZUV8, A0A0D4ZA40, A0A0D4X332, A0A0D4YL62, A0A0D4Y0Y0, A0A0D4XNB5, A0A0D4ZWV4, A0A0D4WWM4, A0A0D4YBZ6, A0A0D4YHL8, A0A0D4YTS8, A0A0D4YXX6, A0A0D4ZD56, A0A0D4YEK6, A0A0D4Y301, A0A0D4X9M3, A0A0D4X0H9, A0A0D4YVS3, A0A0D4YQ33, A0A0D4YSW8, A0A0C5IHF3, A0A0D4YN70, A0A0D4Y3A9, A0A0D4X8D0, A0A0D4XDH4, A0A0D4ZV52, A0A0D4XUF2, A0A0D4XAY8, A0A0D4XEV9, A0A0D4Z7B7, B1AKI9, A0A0D4ZIH7, A0A0D4YYL6, A0A0D4X…	Ism1p	InterPro
LOC101864948	-2.92
LOC101866854	-2.92
LUZP1	-2.92	UniProtKB	I3LNF8, G3T0Z6, E2RDB1, G1SEW2, G1PGB8, H2N8N2, K7F582, I3NHV7, H0YT69, G1RAI0, A0A096MNW4, M3YWU8, R4GHN9, H0VHL6, Q86V48, D2HCC0, F7DN16, E1BKT0, F6V9N6, U3ITM8, H9GNT5, U3JED4, H2RCT1, W5PCM4, G3WEM3, G1MR64, F7D7F7, H0WK62, G3R8L5, M3WJH8	Uncharacterized protein	Ensembl
STON1	-2.92	UniProtKB	U6CQA5, G3TBV8, G1LIX0, Q9Y6Q2, H2P693, D8KW34, D8KWE1, M3XJG9, V8PGP3, H7C1E2, D2GUC0, M3XH75, E1BRM0, H3AU85, F1SQI6, G1N1Y3, A0A0D9RMF1, U3F4Y6, H2QHW4, G1LIV9, U3K939, U3BDS7, A0A096NUF3, E1BJ14, H9F9X7, Q0VAG7, Q0VAG8	Uncharacterized protein	InterPro
LOC101865648	-2.91
LOC102134337	-2.91
THSD7A	-2.89	UniProtKB	G3WCF8, H0UTK2, K7FEZ3, G1SW21, M3YRR2, F6U7M2, H0YW06, A0A096MZ54, G1KNP5, W5PAE1, F1NPY9, G3URQ6, F7DXQ5, G3QYB2, M3WI04, H2PMT5, F1MLQ7, I3NBU6, F1PSZ0, H0XY31, U3K6D9, F7CEA8, H2R5S7, G1P9H9, U3IBG3, G1S2C1, G3SP80, I3L9B1, Q9UPZ6, F6R641, F7D3M3	Uncharacterized protein	Ensembl
MMP16	-2.86	UniProtKB	F7G1M2, V8NYQ8, G1MFI5, F1NX42, E5RJA7, A0A096NDF0, F1N797, G3UP24, A0A0D9RKH8, M3YHQ7, F6V753, F7G8Z6, U3JRD6, A0A0B2W0F6, F1RXD8, H0ZNH0, H9F1G1, G3S039, H2PQR4, F1PLV8, G3URH9, G1NY95, H2ZRX6, F6XPY4, A0A034W9T5, H0WLC1, I3LZT7, G3VKI8, G1KJV8, P51512, A0A034VUE2, F6XP71, K7BXK7, A0A034WCE1, K7G946, G1T0W4, E6ZIC2, M3WTU5, G1NH03, H9FB24, H0UZ55, U3J716, W8AD11, Q1EQ66, H2QWE3, G1QMU2, G3T4E2,…	Matrix metalloproteinase-16	InterPro
CLEC12A	-2.84	UniProtKB	Q5QGZ9, A0A076KXE7	C-type lectin domain family 12 member A	UniProt
NGRN	-2.83	UniProtKB	F7HYB7, F7HYC5, G3TLP4, Q9NPE2, F6Z313, F6SR39, G1RMW6, G3RT32, F6Q6Q1, G1M4Q8, A0A087WWE0, F1P863, W5PRD1, Q5R7E7, G1U5G6, H0WBV0, F6U0A0, Q2HJC0, F7FPT0, M3X9U4, H2RBF9, M3YW99, G3WBL6	Neugrin	GO_Central
CD93	-2.81	UniProtKB	H0W956, G1RLD8, G3NQ94, G3WG62, M3ZY11, F7HWQ1, I3NLE4, F7FS92, I3N3W0, C5ISB5, H2QK25, I3JNF8, F1PCS8, F7DPN0, A0A0D9RF86, Q8IXK1, H0XGV3, M5DFC0, H2RXX0, E1BQ95, A0A087YQU4, H0W139, F1SAT8, E1BGJ5, G1LTF0, F7C9U4, H0ZAY1, G1KWK0, F7DPL1, V8NY71, I7J4E7, F6TH29, G1T857, W5LTL1, U3KAV1, Q9NPY3, H2P168, A0A096NVS3, M3XQ02, H3BEL6, W5P538, G1PHM3, G3UFB0, M3WY18	Uncharacterized protein	InterPro
TMEM246	-2.81	UniProtKB	F6RHH0, Q5R868, Q9BRR3	Uncharacterized protein	UniProt
BCL2L2	-2.8	UniProtKB	Q1RMX3, G3WPT2, G3WPT1, M3Y5X5, H0YJC7, Q92843, Q05KI8, G3V5A9, G1RYB4, F7G6M3, Q005V8, G3V3G8, Q45T69, F6PH48, G1Q051, F7IIN0, G3QGF9, G7MX43, H3AAS7, G1TV33, H0XR82, H0VEU9, G3TMU7, Q462R4, A0A0D9RU30, H2Q805, A0A0C9QYM0, G1P3J2, F1S9E4, G1LMC3, G3V4B7, G3V3B7, F6U940	BCL2L2 protein	InterPro
CARD6	-2.79	UniProtKB	H2U978, E2QX66, H3CQQ0, G1P9J6, W5PHL9, G1SNT3, W5LY16, I3NHF6, F6X4A6, H0VP09, F7HR61, A0A087XIE6, G3SS93, W5LTY0, A0A096N700, F7BFH7, G1SMH2, G3WLP2, G3WLP1, M3X0N2, H9ZEG4, G1MA86, M3ZPE1, G1S3D9, F6X4B5, G3QL51, Q9BX69, E1B9A2, J9P330, H2U979, I3JFF4, H2QQT4, A0A0B4J1T5, H2LSA6, G3P494, A0A0D9RWG8, H2U980, F1PIZ1, M3YTI2, F6ZK04, H0XR55	Uncharacterized protein	InterPro
EMR1	-2.77	UniProtKB	B3STQ9, F1PJ40, K7FGP9, K9IVL3	Egf-like module containing mucin-like hormone receptor-like 1	InterPro
MGLL	-2.75	UniProtKB	F6Z3L1, F7G8U4, H0WSA8, H0ZCC8, H2RBJ9, G1M983, W5P6D2, E7EWX8, H0UZY9, F7EFI6, F6V865, Q99685, M3Z0X2, U3ICY5, E1C6V2, A0A096NQ64, F7CPX3, M3XD05, G3QD66, L0SSJ8, G3WEC6, U3JZM0, F1MC02, G1SSU3, A0A075FHV0, B8XSJ9, G1KGG4, I3N6A8, G1PW80, G3TYG9, G1N608, K7G2A9, H2P9F6	Lysophospholipase (MGLL)	GOC
KIF5B	-2.74	UniProtKB	E1C3A1, A0A0D9RGR4, V8PEE5, H0YRX2, G7N1U0, F6UPB7, F6PPG1, G1N3L1, G1TDU0, G3RC75, Q564G8, G1S940, G1NUV6, F6X0P8, G3TIS1, P33176, K9J4S7, K7F9N9, H3AI90, F6TKP6, H0XFK3, U3JXB6, F6QI31, Q2TA90, D3DRX6, M3YNP9, Q3MHM9, A0A096P419, M3WU61, Q66K46, G3VVI3, W5PVU0, A0A096P421, G1KGA8, Q6P164, H0VBZ6, G1LUW8, U3IKT3, H2R425, F1RWC5, I3N6K3, F7BJ22, F1N1G7, E2QTN0, F6YJP5	Kinesin-like protein	UniProt
PLEKHO2	-2.74	UniProtKB	H0X2J9	Uncharacterized protein	InterPro
SDK1	-2.74	UniProtKB	G3W0Z5, F1RI55, H0WVM6, I3LZN3, H2PLD2, F1PZR0, Q8AV58, Q93WX4, G3RAY2, F7AHX5, F6SYK6, K7FKS3, G1MW55, G1SF16, H9G6H2, F7BC93, H2QU44, Q7Z5N4, H0VS84, H0ZVJ6, F6SY49, F1MFI5, U3KHG6, G3SNA7, G1LIK4, G1RZS4, U3IAM3, F1NT50, A0A096NZP1	Uncharacterized protein	Ensembl
TLR2	-2.74	UniProtKB	B5T263, A0A075DX00, I3NCQ5, H0XHK1, G3VZD3, A0A0A7M000, F7HQL3, Q5DX20, B5T269, Q56GY8, B5T267, A0A0A7LYB1, B5T268, Q0GC71, A0A0B5KBC7, G1Q8E0, D2JYJ2, W8BU76, D2JYJ1, Q689D1, D2JYJ4, D2JYJ3, D2JYJ0, H2QQA8, A0A0A7LY37, K7DWA2, A0A0A7LYA6, A0A0A7LY36, Q9R1F8, O60603, A0A0A7LYA3, A0A0A7LY33, A0A0A7LYA2, Q56GZ8, A0A0B5JFJ5, F1PAV5, W5Q0A3, G3UL46, A0A0A7M0A1, W6A4U5, A0A0A7LY45, E2DIE5, A0A0A7M0A7,…	Tachykinin-like peptides receptor 99D	InterPro
TMEM2	-2.74	UniProtKB	I3M113, V8NN56, M3YC81, U3DCA2, M3X2I6, G1QJU1, K7GHH9, A0A024R229, G1P1G8, F7I4H8, U6CR59, G1LKZ3, H9YUW3, G1SET5, W5PTE6, F7CEF4, H0VQ59, Q9UHN6, I3LK96, H9FFR3, H9F8Z0, H0X803, F7AG84, G1KN10, A0A096P1R5, H2PSD4, B4E1B9, H9F010, F1MNY2, G3UTR2, H0YRG1, F1PH14, U3J4X8, K7AM15, U3K865, H9FJB0, G3VTP2, F6Z4U0, G7NGB0, G3TFJ1, G3R3Z3, H2QZU4	Transmembrane protein 2, isoform CRA_b	UniProt
ZDHHC2	-2.74	UniProtKB	A0A0A1WLV1, F6TQS8, I2CX55, I0FKY1, H2QVS6, E5RFZ7, H0V4C6, F1SET7, Q9UIJ5, H2PPM5, K7FYZ2, A0A096MZ13, F7AXP5, M3XK06, G1KF61, G1NW00, G1M5B0, H9F690, K7AZS2, F1PRY6, H0WS46, F7CAZ8, U3IWF2, F6TF01, U3BCT6, F1MPF2, G3WFR2, F1NVH3, G3WFR1, I3LAG5, G5E7C4, H0ZA87, I3MD11, G1QPY3, G3RL61, M3Z2Q0, M3VV20, G3MXF3, F1PU04, W5PIE6, A0A0D9RW47, U3EE61, G1T7P7, U3KA27, H3AQ09, F6ZIT6, F7GMT9	Palmitoyltransferase	Ensembl
DPY19L1	-2.73	UniProtKB	F6YS65, M3Y952, H7C1I8, F1N3H6, A0A0D9RQZ2, T2MC57, E1BUZ4, G1RZX9, G3QYW4, G1L4H3, G1TAM2, H0VLI9, H0X2F0, G3WSC7, Q2PZI1, U3JJ83, K7BFJ7, U3IVM3, H9F9N9, F1Q0I4, W5P6T5, G1PNW6, H2QV65, W5P6T1, F6VRR6, G3T107, H0Z4M1, M3XJI1, H0Z4M4, H0Z4M7, H3AK11, F6QTN5, A0A096NQH4, I3MPY3, I3LG81, F6UL25, H7C3M5, F6Y8Z6, M3W6Z8	Uncharacterized protein	Ensembl
LOC101925686	-2.71
KAZN	-2.7	UniProtKB	G1PEN9, F1NVI4, G3VJT0, H0WVV4, H0YWB1, H0VAG6, G1N2E3, A0A096NDA3, U3IPS7, F1PIR5, D2HH19, U3K5Q3, E1BB34, G1TD10, Q674X7, K7EUH4, G1R7P4, F7BQX1, G3RCP8, F1SUX8, M3YY38, M3WSG2, W5PLH8, H2RCI0, G3SLG5, F7E221, K7FAA9, F7CLP2, I3N7P5	Uncharacterized protein	Ensembl
LOC101867118	-2.7
RNF150	-2.7	UniProtKB	W5PRN6, U3JQU2, J9NYE2, G3WZS8, H2R381, Q9ULK6, G1L883, K7CGV4, A0A096MM07, T2M3E9, F7IEW3, F1RRE9, E1C2N7, K7GIF3, G3SQZ4, W5KCZ2, G1MW65, G1KAZ7, H9F6E3, G1L881, G1QZF5, G3SEG7, U3IPF2, U3IPF4, F7CRS7, H0WUZ3, J9JHQ4, M3YXD3, H0V2D8, F7CVD4, F6SZL0, D6RIE5, G1PE68, G1T5F9, F1NSQ8, H0YVV2, H2PED4	Uncharacterized protein	InterPro
WASF3	-2.7	UniProtKB	A0A0B2VDP3, G1RV28, A0A096MT50, F7D261, F7DDF0, G3WKI8, A0A096N954, V5GXI1, W5UCS4, G1NQD6, F7GRZ2, G3WKI9, Q5T8P4, F7D4Y4, G3TU94, V8P8G2, G1PCW8, U3IBE6, E2RMZ6, G1SJX0, U6CZR8, E1BPY0, G3TKQ1, M3WBI4, F6QUX0, V8PC19, F1RTK2, H0VG94, A0A0A1XKJ3, I3LQK6, H2Q7B6, A0A0D9RZG6, H2NJG7, A0A034WYD8, M3XHT2, F7GRX8, F7DDG6, H9G721, G3R9W4, Q9UPY6, G1L4Z4, H0WUS8, H2R026, E1C2T1, H2ZWI6, H2ZWI7, K7FVK0,…	Wiskott-Aldrich syndrome protein family member 3	InterPro
LOC101864986	-2.69
LOC101926712	-2.69
LOC102128597	-2.66
FAT4	-2.65	UniProtKB	A0A089QCK8, A0A089QA51, A0A089QCK4, A0A089RPI4, G3WLA3, G3SYU9, H9FM20, H9FM21, E2RR85, A0A089Q799, F1SUA7, E1B949, H9FFY2, A0A089QA56, G1M2V1, H9FH35, H9FM19, H9FEY7, H9FM17, A0A089QA62, U6D4S8, U3IJF8, H9FM18, A0A089QCJ8, G3RBU2, I3MEP7, A0A089RPL0, A0A089QCJ4, G1SVR1, A0A089Q6B3, X2G0E6, K7FN34, A0A089Q792, K7CJ58, A0A0D9S0N3, H3D6B1, A0A089Q786, H0WL39, W5Q5D8, U3K0F6, F7HN53, W5M479, H9FGH8,…	FAT atypical cadherin 4	InterPro
ITGAV	-2.64	UniProtKB	A0A0D9RJD3, G3UF01, F6W3W7, P26008, W5Q553, A1Z1R6, F1N1A9, P80746, F7D459, F7CBS5, K7GT59, H2P832, F6QSK2, G3QQK9, K7GPM1, U3DYD0, M3XWP9, G1TE34, F7FY82, H0WK80, H0ZLJ7, H9G5P5, M3W4G7, F7IJZ6, A5YM53, F7FY86, A7YY42, K7G9S3, G1R3W3, B5B2Z3, F1P8Q0, P06756, U3IFY9, F1NGX1, W5UTE5, F6UT65, H2R6C3, F7F7D9, U3CXG7, A0A0B8S065, G3W4U7, K7GMP6, H0VT70, A2RQD8, L7RXH0, H2ZSZ2, F7G9T1, A0A096N3C2, F1R…	Uncharacterized protein	Ensembl
DSE	-2.62	UniProtKB	A0A096N250, G1SSV2, I3MLX4, F6Z8C6, G1RRN5, F7GEF4, F6TYR9, G1NYZ3, K7FB28, F6UT89, F6Z234, H2PK49, H2R1I9, E1C3Z8, H0WI32, H0V0T0, F1MM96, M3YG02, H9FKR6, G3VBP6, H9FKR5, F1RZI9, W5PHW3, U3K8X7, H9EYP8, G1LGE2, G3T365, G1KP68, G3S6H6, Q9UL01, F7IFM6, M3WQV1, P0C2H4, R0L752, H0ZNX6, F6SXM2	Uncharacterized protein	Ensembl
PTPRM	-2.62	UniProtKB	U3DG90, G3R9M8, W5NQY6, F6XD69, E1BPU9, H3ALW0, Q86V60, F6UJD3, F6WRW8, G1PUT8, E7EPS8, P28827, G1TB02, F6RJ58, W5M4L8, U3CG89, H9G7C9, F1PUN5, G3VZT3, A0A096N2E3, K7FPV1, H0ZI52, U3IM79, A0A0D9RYA9, G1LLN7, W5M4I9, I3LC13, I3LXK8, H9FXU4, H9FXU5, F7C9R6, V8NY46, U3E4C0, J3KT55, M3Y0F5, U3CYR3, U3EAZ5, K7FPW6, Q49AC9, H2QE85, F6ZQ35, U3JV32, H0WUS5, F7CPG5, F7CQK2, F6XDJ0, G3QMB7, I2CXE9, F1PUP2,…	Protein-tyrosine-phosphatase	Ensembl
SLC31A2	-2.62	UniProtKB	F6V056, F1Q0H2, G1S3N5, G1TKM2, H2PT37, F6R591, H0YXY8, U3CLW0, H2QXQ0, F7FVX6, I3LWW5, G1PRY1, H0V398, G3WZY3, Q3T0K0, U3E306, M3XCT7, H9EW94, F7AM74, F1SN90, Q53X94, O15432, G1MVG9, H0WX22, W5UHP7, J9P0A4, A0A0D9RIX7, M3Y8W6, A0A096P0U5, U3I200, G3T1S6, G1M3C6, U3JSG7, A0A0B2VAZ3, F7HLP5, G3RCI1, W5P8U1	Uncharacterized protein	InterPro
ANXA3	-2.61	UniProtKB	C3KIV5, D6RFG5, W5QBI9, P12429, G1PL69, G3SEL8, F7H4N2, E2R0N3, H9F1C6, G1TEM7, A0A0D9QWV0, H0XA91, G3R3Y9, C1C3Z2, K7FVZ9, C1BKB4, F6Z8Y2, H2QPR8, D6RA82, F7HF42, F6S7A7, H2PDQ4, G3T860, B5X999, E3TG24, G1RAG3, K7FW24, D6RFJ9, H9F5M6, W5QBJ0, C1BZS7, G1LFR9, I3NAE7, H0VMD9, C1BWX6, A0A096N9E8, D6RAZ8, G3VI35, D6RCA8, M3WET7, G1KFA2, F1MWQ2, Q3SWX7, M3Y5V5, A0A096NWU5, F6ZAK1	Annexin	InterPro
ARHGAP23	-2.61	UniProtKB	J9NRV8, G3WZQ1, K7B0V9, F1MMP0, U3JL70, Q9P227, G1LCU4, G1T1X0, G5E6T2, F7GJ03, H9EQV4, F1P8A3, K7CW73, G1QIQ7, I3LCH8, H9H2F5, H0WDI1, I3NHP4, J9P272, G3U918, M3W4R6, G3N3K9, U3INX9, F6PKW9, A0A0D9S3H3, A0A087WTU4, G1KGM8, H0XZJ3, U3EZ14, F7IQX4, F1SB02, F7IQJ6, G1U5I1, W5PHE8, H2NVE9, T2M467, A0A087WZ73, A0A096P564, M3YUM6, A0A096P565	Rho GTPase-activating protein 23	InterPro
ROCK2	-2.61	UniProtKB	M3WUL5, K7FUW1, D6REE7, F6RG19, A0A088ATG8, A0A0A0MY57, G3U7Q1, H0ZS66, G3U660, M3XI31, G1K8E0, M3YQ38, M5AYF7, G1PSW6, G3SZH5, H2MVL9, G3QQK5, W8BVK1, F6PML3, G1RV80, G1TY77, M5AXS1, M3TYT0, F6TXY5, H2P6Y3, A0A096NJ50, U3JW42, A0A096NJ57, M4ATP9, H0VLY1, G1NML1, H3B7E7, H3B7E8, W5K229, F1N319, H2RCA0, I3M0T4, M5B4R8, K7EDS1, C9JFJ0, T2MHS2, K7FUU5, H9G236, Q28021, Q14DU5, H2MVL7, W8AW70, A0A0D9R…	Non-specific serine/threonine protein kinase	UniProt
HCK	-2.6	UniProtKB	W5NXU9, W5NXU7, Q95M30, G1PBA7, K7F786, H0Y3C5, F1S525, H0Z868, M3Z2G4, G1N615, U6DGA1, H9GEL5, H9EZ11, F1MWN2, U3JSC9, G3QK47, G1SXU8, F1PSI2, E1BXA3, A0A096NUZ0, F7AT17, H7BXG4, H2QK59, H7C5P9, H2ZYD7, H9FAT6, D2H906, H2ZYD6, H0WS71, C1BXS5, F1MTD8, F7HZQ6, G1RF76, I3M562, P08631, G1M4J6, G3WE58, H9YVQ2, G3WE59, H2P1L5, H0VB15, Q9DDK6, G3SIX7, W5U9K8, M3VXI2, A0A0D9RJR2, J3KPD6, F6RBD8, G3T700,…	Non-specific protein-tyrosine kinase	UniProt
INSR	-2.58	UniProtKB	G1QHU4, U3CV09, M3VZL0, H0YQ96, Q86WY9, F7F370, G1U0V9, G1LNQ5, A0A034V4N5, F1SCL0, G1N117, H2NX99, T2MGU8, F1NJT2, U3KHF2, U3FWA3, P06213, F7ATD7, G3RCY5, H0VMQ0, G3RQJ8, G3T361, M3YAM5, G1QHT7, K7GNV6, F6YX75, Q9YI42, H9F9P3, U3FCC1, F7HRJ2, A0A0D9R902, W8C4F7, U3J3T4, Q2F2X9, W5NQ38, F6RLJ3, E2RPM8, K7CJP0, V5GGW7, A0A034UZV1, W8APQ1, U6D221, F6R9D2, F6S8L3, F7HRK0, G1PNP3, Q28516, W5NQ40, K7C…	Insulin-like receptor	InterPro
AP2A2	-2.55	UniProtKB	U3CSV8, W5K672, E9PQP4, G5E675, H3CL14, L1J1P8, H2MVV6, K7D6M6, G3PGB0, A0A0G2JS82, G3T2S6, A0A0G2JRS3, U3EMP8, F1PDT7, H9GR92, F7CVC4, K9J6K8, E9PNC4, A0A0G2JQA4, E9PS94, H9Z5S3, G1PSY1, U3F3N5, K7DFQ1, U3EKV9, A0A0F8B0A6, H0ZHG0, U3KBX9, A0A0G2JRF9, U3EAD7, G1N9N4, H2ZWC7, A0A0D9RDN9, H2ZWC8, H2NCD1, I2CUB9, M3YD34, I3MH11, U3J9R9, M3WI80, T2MIB9, F1RZ02, E9PPZ3, H9FQM0, G1RBZ3, A0A0G2JQM1, U3E…	Uncharacterized protein	InterPro
ABCC3	-2.54	UniProtKB	M3YVN8, G1P565, Q86VN9, Q38IV3, H0VNE4, F1PRY2, D3DTY0, H3AES0, G1LMF9, K7BJ92, G1N9C4, F1N3Y6, H0Y8Q6, F7F9V4, E5FG29, G3WUV5, Q9LK64, H0Y9T4, G1SI90, F7I1G5, K7FZP8, K7FZT5, K7AAA2, F1RTA1, F0ZMG8, V8NLZ2, Q2M3C9, V8NSF4, W5LA76, H0ZFW7, A0A087YLJ4, F7CU08, C3VPX0, M3WGR6, A0A0E3ZCM1, I3N5W0, F7E739, K7GJ68, G1LI04, U3BFN5, O15438, A0A0D9QZK1, F1NM51, W5P061, H0WQ37, A0A0F6PPP5, J9NY13, K7ET12,…	Uncharacterized protein	UniProt
ARHGEF28	-2.53	UniProtKB	Q8N1W1, F7B744, G3WNK9, U3DFA0, H0V8C2, G3RIR6, H2L9N1, W5UDW2, F7F1G4, M3WJ16, H2PFV0, F6RSC0, A0A096N7Y2, F1P9A5, H0WNB3, F6SPS8, W5P420, H2QR28, F7B776, G1N0A3, G3T733, K7G5Q3, K7G5G1, G3T729, G3ULM6, G1P334, G3UV91, U3IL26, M3Y379, G1SDQ4, I3LSI2, H0Z6A7, G3NKC5, G3QNT1, G3WNL0, G1L0U9, F7FXP7, F7BQ60, A0A0D9RSI9, I3MCU1, F6XA24, U3K6H7, G1QY11	Uncharacterized protein	InterPro
CTSC	-2.53	UniProtKB	G1S222, F1NWG2, H0VRZ6, W5P1H0, V8N9E5, W5UDS9, F7H3F1, Q3YAN9, U3CIA8, G3SMJ4, H0X013, Q60HG6, U3JZI7, F7F2M7, F6UY27, F6U2E9, Q5RB02, F6UXY2, R0LCK1, I3V9T1, F7CGB8, I3V9T0, G1PG63, G1NQP8, H9FNY7, G1KQT4, H9FNY8, I3LYH9, K9J6M0, H0ZRP9, O97578, H2NEW7, F1STR1, M3YG39, I3MYD1, A0A061RXT4, K7GBH3, G3VM45, G3VM46, G3QI81, H2Q4I9, P53634, I3V9S3, T2MEP6, M3W9M0, U3D421, H0YCY8, A0A096N4F2, F1N455,…	Cathepsin C	InterPro
KIT	-2.52	UniProtKB	Q15999, U5LL56, A0A0C5G4Q9, A0A0D9QY74, Q2PZA7, Q2PZA8, O77589, Q28317, M3Y412, Q8TCG9, G5E7C2, A0A075CJU3, F1PUW9, F6U370, I3W8V5, I3W8V6, F6ZM42, A0A059V9P6, A0A024RDA0, U3I8W5, K7FMK0, C4PFJ6, U3EUB3, A0A059VJ35, F6ZZW6, H0X0T0, A0A0C5GBV1, A0A0C5G4P5, G1NXV5, Q28889, G1RAC7, G1NH11, G3UE86, F6V858, G3WAP0, O97799, H2QPH5, A0A096P031, U6DG94, Q08156, G3TWK9, A0A0C5GFP5, A0A0C5GFN2, G1KJX6, F1S…	Receptor protein-tyrosine kinase	UniProt
MAGI2	-2.52	UniProtKB	U3IY82, U3IY83, G1M2A1, A0A0B2W4A8, H0YWU2, A0A0D9RHG7, F7GGD1, A0A0D9SF86, G1SFD3, M3Z3K7, C0HBI2, H2PN21, H9F3A8, A0A0D9SFP3, A0A0D9SEZ7, G1REP3, K7F727, F1PUA8, T2MB42, F6RPE4, H0WXE4, H2QUU4, U3C0X1, A0A034VXA4, A0A0D9SGI1, G3UDU3, G3QG32, U3K7A5, C1BWE9, F7GGB7, H0VT08, G1M2A4, A0A0D9SEY4, D6W5N0, A0A096MY89, A0A0D9SFY9, H0WAY6, U3CJ50, G1N2N4, W5Q7W8, A0A0E3D6M1, F7D6P7, W5Q7W5, F6S658, H0X…	Membrane-associated guanylate kinase, WW and PDZ domain-containing protein 2	UniProt
ANTXR2	-2.5	UniProtKB	G3UFW4, W5QC42, W5QC43, A0A0C4DG84, H0X202, H9GFZ9, F7DGR4, F7DCM3, A4FUA5, G1U3Y6, M3WP21, F7EH50, F7DSV6, J3KPY9, G1RAV3, G1LFC0, F7EH39, U3J4S5, M3Y5H2, A0A0D9QWT4, F7BK75, G3S7I7, F6S811, P58335, H2PDQ8, U3CVR5, I2CUV0, H9FHE1, Q32Q26, F6U3S4, A0A096MTQ3, K7GIM0, F7AN24, E2R0J4, F7EH69, E1C761, K7B588, H0YTG0, G3SSX2, I3NHS0, K9J4T3, G3RQC3, H2QPS0, Q08DG9, K7GIM9, G1PSH2, H0UVU7, F1RVC2, G1N…	Uncharacterized protein	InterPro
LOC102140364	-2.5
SLC8A1	-2.49	UniProtKB	K7FBI5, M3W6J2, F6X2W8, K4GE19, K4GE17, R4HES1, H2ZZL9, K4GV87, K4GV89, K4GV88, H9FLU1, R4HET0, K4GE24, K4GE26, G1CFA4, G1CFA5, G1CFA6, G1CFA7, K4GE21, G1CFA8, G1CFA9, K4GFA8, R4HET7, R4HET8, P23685, K4GCN8, K7CH77, K4GU67, A0A0B8RS96, K4GU64, F6S4E7, A0A0D9RJ37, M3YBS2, K4GIV0, G1PPV9, K4GCP6, E9PCL8, V8NKE1, K4GCP2, G1N5U3, G1T042, F1NYZ4, F7A685, K4GLT1, K4GLT2, K4GLT3, K4GLT4, K4GLT5, A0A096N…	Uncharacterized protein	Ensembl
FAM49A	-2.47	UniProtKB	G1NWA5, G3UTI6, I3MXU6, G1L2J0, F7DMM2, G1SU04, Q5ZI04, M3YQB2, A0A096NR07, K7G061, G3VCT3, Q5R6L2, G3U4G6, H0ZSA2, F6ZPT8, W5Q4P9, U3IPU7, E2QRS9, Q17QT7, G1QLG9, F7AGF6, F2Z5E7, F6UFH8, F6ZYP5, M3W1M1, H0X047, Q9H0Q0, U3K210, H2QHG7, G1K8Z7, G3SAC3	Uncharacterized protein	Ensembl
JDP2	-2.46	UniProtKB	I3N9C6, H0V886, G3WYK7, F6RBS1, W5UTP7, H0YKE4, H2Q8N0, F7I4L5, H3BFA4, Q8WYK2, M4AK33, E2QYK4, G3UIV2, E1BCY2, G1KTB8, G1NJE3, I3N927, E1C7D8, W5NUP1, G1S3B0, H2NLU5, H0XJ37, A0A096NS53, U3IV45, G3NXM4, V8PD04, K7GHZ7, W5L509, W5MWY9, M3YCL4, G1MJ42, F7AVE1, F6XD14, G3R5B5, A0A087YAK3, A0A0D9RI69, A0A024R6D7, G1SV80, H3DJ51, U3JV27, M3XDZ5, H0ZPQ0, F7DWR2	Jun dimerization protein 2, isoform CRA_a	InterPro
LOC101865761	-2.44
ANGPT1	-2.41	UniProtKB	Q60FC1, F1S1F8, H0XG11, A0A096N0L3, F7GYR3, G1SK98, V8NX91, M3Y3I8, F1P080, Q9BDM0, I3MAV3, Q9BDY8, F7F3F4, W5Q0G4, E7ERK4, G3S307, O18920, G1NIE7, U3JU92, Q15389, H2QWK4, H2PR10, H0ZPP4, F6PKL2, U3IID3, A0A0D9RH22, F7EJK0, V8NWD6, K7G863, B4DTQ9, G1NY76, E5RFF4, G1MAR4, F7E6U7, F1P933, H0UYP8, G3SZM6, G8JKX3, M3X6I2, G1KJT2, F6XYS3, G1QVI4	Uncharacterized protein	InterPro
FLT1	-2.41	UniProtKB	F1RSU5, G3SHN4, H9EWU7, F6YEX6, V8N7J8, F1MDD9, G1KJ54, G1NQC6, H2NJI3, X2C8T1, V8NCF7, G3X1E2, G3X1E1, F7FAY2, A0A096MWZ2, A0A096N1J5, H9EZF6, G1QIB2, X2QEJ0, P17948, F7HJI3, H9N1E7, G3TFJ0, G1P289, H2Q7C8, H0ZN34, F7HE27, H3BD36, M3Y011, U3K1K4, H0XBK8, E6ZIS0, G3R080, F1PKV5, K7G2X4, F6XVT0, V9Q5H8, V9Q458, Q3Y6U3, X2QIK8, F7HJ92, F7GDD2, Q8QHL3, F6T133, L7RSL3, K7AVV7, G1L6D7, F7EY52, G1L6D4,…	Receptor protein-tyrosine kinase	UniProt
SLCO1B1	-2.4	UniProtKB	Q9Y6L6, G3SG45, K4P1Y1, L7TEQ7, K4P403, A0A024RAU7, F6UHW9, Q6NSF9, H0ZQ05, A0A096NF06, K4PF41, Q0VGM0, H2Q5K6, Q05CV5, Q7Z4M3, A0A0D9R6M9, H2NGS3, F1NQ62, G1QXS7	Solute carrier organic anion transporter family member	InterPro
FAM13C	-2.38	UniProtKB	M4A2U7, H2LL19, Q8NE31	Uncharacterized protein	InterPro
LOC102125623	-2.38
CPED1	-2.37	UniProtKB	F1SJF7, G3REA3, H2QVA3, F6PKV8, K7FH91, U3K5T9, F7IJK8, I3M859, H2PNB6, F6PL72, E1BUF0, A0A096NR03, G1SPM9, A4D0V7, D2HJH2, H0Z2I9, G1N958, M3X483, G1KG15, G3WJY8, F7AFY6, H0VAP2, H0WPF7, G1PTM3, W5QA12, M3Y6I1, F6WG53, G1RMI6, G3MWQ8	Uncharacterized protein	Ensembl
MYLK	-2.34	UniProtKB	G3RKG5, G1QHZ6, F7HQU3, P29294, A0A0B2UVL2, V5IAR8, K7F8V2, F1N269, F6VWK0, F8WBL7, R0LM85, Q06S79, G3UC08, W8AQC6, V5IA00, G1U9Q7, G1KKG2, U3KG18, F7HQT0, W8AT43, F1PIF6, F1SQ52, I3LVW2, H0VWV4, W8BC04, O02827, H2R459, Q28824, H9F768, H0XBG4, H9FUR0, V5GAY4, H2ZSA6, F1NQ78, H0V3V2, G1PJI6, H0V3V3, A0A0D9R5H3, E1C906, A0A034V706, F6RH61, G3TAT4, G1TZS1, F7DDC7, H2P9I8, W6A3C2, F6VQQ5, M3XZ28, F7H…	Myosin light chain kinase, smooth muscle	UniProt
ST5	-2.33	UniProtKB	P78524, K7GFK0, U3JDW2, W5PY36, M3W9J6, F1N8Z5, G1NVG1, A0A096N9B9, F1RGC1, G3SLQ2, F6UVD7, G1S701, H2NE56, F6VMU9, G1KJI8, G1LBZ9, G1SNY4, F7GJR1, E2RH24, H2QZR4, H0X6Q7, H0ZDD7, A5D7B4, G3RG45, H0VAI2, U3I702, D3KYH9, A0A0C4MT23, M3YM84, F7EMG5, D7R262	Uncharacterized protein	Ensembl
ZNF704	-2.33	UniProtKB	K7G4C1, M3XRU9, G1KNV9, F1PGS4, Q6ZNC4, G3QZV4, F6S2J5, W5UII6, G3U783, G1LPR8, F6X9D1, F6QU04, H0WZ52, F6RAU5, H2PQM9, H3AV33, V8PCX3, F1NDJ9, A0A0D9RLJ7, M3WL03, G1QPS1, U3K1U0, F7B8Q5, F1MWE1, K7G4D3, A0A096MZ06, G1QCI9, G3WRZ2, V8NPM3, A0A0C9QIY2, G1NGH5, H0VLL1, H2QWC1, G1TBR7, W5PG53, I3N5Z1, H0ZN30, U3IA63, I3LMJ2	Uncharacterized protein	InterPro
HSD17B12	-2.29	UniProtKB	A0A096N4Y8, Q49RB0, G3QHY5, F7HCR3, V8P7D5, A0A0A9YMW9, F7DY10, H2Q3G0, F7DYP3, K7FXR6, E2RJ79, H0VTB9, T2MBX0, I3LE12, M3XF85, E9PI21, Q5E9H7, F6Q4Z8, G1LDY4, G1TGT5, F7G6W5, A0A096MMC0, G3SEM4, W5NS44, H0ZIX0, U3IL43, M3Y456, O57314, I3LJY8, H9FVA1, U3KD30, A0A0D9QZQ5, R4GHS0, H2NDN2, G1S8H9, G1NYW8, G3VHZ4, D3DR22, Q4R5G7, H0WZW2, I3M648, F6RR92, D0G6Y0, G1NDF2, Q53GQ0	Uncharacterized protein	Ensembl
LOC101926015	3.04
LOC101865530	3.08
ZNF831	3.16	UniProtKB	H2P2G1, W5Q3C5, A0A0D9RSV0, G1TCI9, G3U7J8, A0A096NNF6, G3SDS4, M3VVJ0, G3WEJ3, K7FEK0, M3Y6T7, G1NRA3, H2QKP2, H9G4K4, U3K810, A0A0A1X421, H0V3U2, V8NG32, I3MWY4, F1MDR1, F7AZ01, H0XJ25, F1PNQ1, J9P6Z7, G1REL6, G1NYH6, Q5JPB2, H0ZCE0	Uncharacterized protein	InterPro
TFPI	3.2	UniProtKB	V8P216, P19761, I3NBF8, G1SUS9, G3RM61, F7HMY0, M3WI50, I3MEX6, C9JP39, G1LRQ5, H2P836, C9J103, H0WPT8, C8KI01, H0ZLE2, F6WEH0, E1BUM2, C9JBB3, H9EYM4, F7C0N5, Q28874, P10646, I0FUM5, A0A0C9PJE7, U3E227, A0A096N566, G1MZI9, M3YLF3, G3TI19, Q1LZ77, C9JT76, A0A0D9RJ63, F6X1B0, W5Q4W4, Q28864, C9JQ14, W5Q4W3, H2QJ44, H0VR26, R9XTN2, H9G4K9, K7AMX8, U3JPH1, C1L478, U3I6Q5, C9JKV3, K7FND1, A0A0B2UXW5,…	Uncharacterized protein	InterPro
FAM102A	3.25	UniProtKB	Q5T9C2	Protein FAM102A	IntAct
CD6	3.26	UniProtKB	H3A8Y5, H0XG37, H3A8Y4, Q6AZ88, F1PV91, G3T2K4, K7GS39, A0A096M1J3, G1T3D3, U3KC41, K7GRE4, F1MU15, A0A0D9R1S8, G1RTX7, I3M9U1, H9GPP0, H1A5F7, Q8N4Q7, G5E973, H0VM84, W5MNV3, Q8WWJ7, Q8WWJ6, Q8WWJ5, G3R012, G3W814, Q8WWJ4, Q8WWJ3, P30203, F6XGL7, M3WJ99, E7ER04, F7ECS3, H0YGL3, F6UFK6, H2Q3T6, W5Q3F8, F1RIA6, A0A096MPD5, G1P286, F7AQW0, U6DI30, G1LLW5, K7FTJ7, M3YSG5, H9ZFC2, H2ND91, F7FWL4, H0Z…	Uncharacterized protein	InterPro
GRAP	3.27	UniProtKB	Q13588	GRB2-related adapter protein	PINC
LOC102122467	3.27
SUSD4	3.31	UniProtKB	H2N3M2, G1PG87, U3II21, Q5VX71, I3MFI7, M3W7L0, H0YWQ1, U3KBW1, F7G841, G3QKJ9, H0UTN5, W5PY21, F1P041, Q5R8M2, G3SVL4, H0XF03, G1N9K4, F1Q0G7, G1QI11, H2R831, G1SQK9, F7FLA7, G3WHU1, F7G9N1, A0A096MN67, G1KAS8, F6SIP8, F1MBG4, K7FKH2, F6YXK9, G1MAG5	Uncharacterized protein	Ensembl
SKAP1	3.33	UniProtKB	H0WB04, G1MUJ0, Q86WV1, F6Z909, G7NHC4, I3MLI9, G3RA58, F6WFY3, G1SFZ7, M3YV35, E1B8S2, F6SFD3, G1LE68, G1KFG7, U3KBX3, G1P3T7, G1QQ68, M3W2U6, G3W505, W5PBB0, H2NVH2, H0XE51, H0ZUE7, U3IK51, A0A096P420, U6D5E3, K7FJ06, F1PDX8, G3TL03, H2QDB6, F7E1S4, E6ZI25, F6RQ54	Uncharacterized protein	Ensembl
TXK	3.34	UniProtKB	F6Y4C4, G1S6F7, H0VRC2, U3JKB1, G3TCH6, K7G2B8, M3Y1X8, H3A0Q8, G1NHH0, D6RBM7, I3LR35, H2QPF4, A0A087YJ36, W5Q5S4, H0ZUA2, W5N273, A0A096NDG3, G3Q3W6, A0A0D9RX67, H2LBZ6, W5N266, G3R0X0, E1C035, G1P9V2, I3K0L4, H2PD90, V9GZA3, D6R9F2, V9GZ99, Q6LD13, D6RA14, E2RBA0, P42681, U3IS07, F6ZAP5, M4A5N1, E7EQN8, H0WPF6, U6DRA3, G1L8Z6, F1MQA9, F7ADL9, G3VAF7, W5LKK2, F7IBB6, Q6LD14, G1STH8, M3WKJ4, Q3T…	Non-specific protein-tyrosine kinase	UniProt
LOC101925692	3.38
APBA2	3.39	UniProtKB	A0A0D9R342, H0YNG7, G1M9W6, U3IJ00, H3BGR6, Q5RD33, H2Q921, H2Q920, F6PW11, U3FBH3, H0YMS0, F6VY08, H0YL28, K7GIW8, M3YI20, F7AAW9, H0UYR0, F1MLB6, K7DPN7, G1RPD4, H2RBK3, G1PSS4, H0Z5F2, G3S377, U3DLR1, H9EUQ7, F6V5G5, U3DYC1, U3D4S1, F1PP27, H0XEC6, A0A096NT22, F7GLW2, U6DLI1, G3QSC5, U3KDG0, I3LW36, G3WS16, U3F3E4, F7E0Y7, Q99767, F1SNQ7, A0JNA0, W5Q4N7, G3U6Z6, U3FXE8, G1T3A7, M3W8W8, H9G3K0,…	Uncharacterized protein	InterPro
LOC102138353	3.41
KLHL3	3.47	UniProtKB	F1MBP6, F7HKU1, G1RAX9, M3WMU2, H9YY04, H2QRJ6, I3M4P0, Q8N4I8, Q5REP9, I3IXK2, J9JH85, H3CPM2, F7ISP0, H9FAN4, W5KTE4, M4A295, F7ISN5, G1N7E2, F1RH95, F7BXS6, G1KTL8, H9FGW4, G3VDI6, U3C4T8, F6WHB6, K7GAA9, G1STB2, H0VII9, A0A0D9RLK8, H3AIP0, F1PVW9, G1P987, A0A096MMK1, D6RH21, U3I0A1, G1MCZ5, W5N2R4, H0X7T7, H0YSH9, F1PVX0, H2L3F0, Q49A42, G3PVT4, U3K089, U6DTD8, G3PVT7, M3YES3, H2PGM6, G3UIG9,…	Uncharacterized protein	InterPro
PRKCQ	3.47	UniProtKB	A0A0D9RM39, F7IL88, M3WBI7, G1P1I5, K7FRE0, F7IL85, H9FX48, F7HC75, H0X8H6, G3WMI8, G3WMI9, H2N9P8, E1BMG4, G1MBJ7, F7E634, F7A952, V8N6E1, V8N5Y1, M3YY49, H0VS11, F6PVR3, G1MY89, F7G6Y7, G1MBJ5, H2R0T5, E2RNP2, G3RCJ3, A0A0B8RTC1, U3J095, W5PUR2, U3E3M6, A0A087X0I9, H0YUY9, U3JGG1, F6WA17, G1MBR9, F1RUL3, Q04759, U3FER6, H3BA09, G1SY23, G1KDN6, G3SNX2, G1RM82, F7A945, E1BXF2, A0A096P3D1	Protein kinase C	UniProt
TNC	3.52	UniProtKB	M3XRH1, H0VZH7, W5P7G4, F6Y8P7, K7GFT8, F1SMI5, U3JS04, F7HU55, D2H2H6, G3T5T8, I3LDR6, U3J4N9, F1N8F4, J9NRP5, M3W358, P10039, G1MVR1, Q29116, H2QXR9, F7HXW6, G3TV51, H9G7Z8, A0A0B2W2K4, G1PQY9, I3M282, G3W6G8, A0A096P0R9, H0X2P0, P24821, H2PT66, F6PN81, F7A8C6, H0YYH3, I3LJU9, G1S4Q8, G1TW43, G3R3R9, F1MRZ6	Uncharacterized protein	Ensembl
EFEMP1	3.69	UniProtKB	G1KCE9, F6RHE2, H2REY4, A0A096M7V9, Q580Q6, A0A087XGS5, G3RW79, G1RE04, D8KW20, C9JPZ9, G3UKL8, F6PVG3, D2GY76, H3CTC1, M3VVE6, G1P177, G3NZD4, A7YF09, F7B165, Q53TA7, A7YF08, A7YF06, A7YF04, A7YF02, F7HR98, G1MSX1, A2VE41, G3WI99, F8SIP2, W5NVG2, C9JQX7, F7FRR9, E1C6M8, H0UYV6, U3K9I7, H3ANH7, F7HX29, H2P658, K7G418, A0A0D9RPF4, R0LJA8, Q7YQD7, G1T7U6, W5NE58, H0WFM8, G7NA36, H0Z947, A0A096NP06,…	Uncharacterized protein	InterPro
RCAN3	3.71	UniProtKB	F7FWH1, U3I416, F7EXQ5, H9GPT0, Q2KIA1, H3B629, G1PJS1, M3ZC21, G1N2N5, Q5ZJV6, E2RFJ5, F6Z1I6, W5P9D3, F7E0E2, F6VZG0, G1SD69, A0A0D9S876, F7IDS3, F7IDS2, U6DKD9, H2PYB8, Q9UKA8, F7IDS0, M3YWL8, G1RCG5, G3TJ94, M3VXP4, F7IDR8, G3W895, F7FWG2, U3F9C5, H2N8J6, G3RC15, G3UJT8, A0A096N499, C8CJH0, G7MHN8, H0YF64, D2GWE0, U3JCJ3, V8NMN2, H0YSB9, H0V0P8, H0XDB1, F1STV5, K7G6F6, I3M1A5	Uncharacterized protein	InterPro
LOC101865496	3.8
LOC101866127	3.8
LOC101925658	3.81
LOC102129741	3.91
BMPER	3.99	UniProtKB	A0A096N4J2, Q8N8U9, I3MEG5, H9FA95, U3KLU7, I3LLQ4, G1PQZ3, G1RZV2, F6VQU9, A0A090N7U6, A0JNC8, G1LJ14, F7HBZ7, G1LJ16, H9FK49, F1Q0J4, F8WDG9, H0Z4J0, G1NHL6, U3JJ80, W5P7R0, G3RBH1, U6CQH4, K7CAA8, G1T3Q5, K7GBI4, G1KIM8, U3IWM0, M3VVE3, I3LAF3, F6WDH9, F1SIK5, Q643S1, G3WEY7, H9FK50, G3ST19, F6WXQ3, H2QUE9, A0A0D9RQW8, M3XI48, M3Y2L6, H2PME4, K7AG71, F6S0C4, H3ACK9, F6ZBZ8, H0WSV1	BMP-binding endothelial regulator protein	Ensembl
LOC102144615	4.02
TLL1	4.02	UniProtKB	H2QQE4, U3FUF2, G3UU46, F7A5S8, M3WID7, G3UBW1, F1N0X6, G1LER7, G1R413, H2PEP6, F6WCA9, A0A0C9QIG9, F1Q3H3, H0V937, F7DZV7, W5Q415, H0X538, A0A0A9ZCK0, G1MTY5, F7GX95, G1R415, G3W493, G3S0H7, F1P398, B7ZLW3, D2HGS4, A0A0D9S1Y6, G1PHI3, I3N6M8, Q8L7S1, E9PD25, A0A096MWL4, G3QD43, F1RWD2, D6RCE0, F7APE4, U3J0X9, K7FAR3, H0Z6G5, F4HRB4, V8NCA7, H9G3K1, U3K9U6, Q9DER7, I3MDE4, O43897, H3ANE1, U6CXW9,…	Metalloendopeptidase	InterPro
KIAA1462	4.13	UniProtKB	F1NBX5, U3MP71, G1TXE7, G1PTP5, F6QJW8, F1RWE1, F7HFB5, K7DBE6, U3MJV4, F1P6L3, U3MIB7, G1KGP0, U3MJ74, G1N428, U3MJV7, U3MIB3, U3MJ36, U3MHQ8, G1S5C5, F7H8F8, H0XNY8, U3MJ31, A0A0D9RGX6, K7BZE9, U3MP62, M3WUW2, U3F0J3, U3MHQ2, H2NA34, U3MHG1, U3MJT9, F7F6K7, U3MJ68, U3IFE8, G5E512, H2QUQ7, H9ZBP2, M3YY98, U3MJ26, F6ZGB9, K7GD11, H9FXP7, U3MP92, U3MHP6, G3WNR5, U3MP94, U3MHP0, G3T7G1, U3MHL9, W5P…	Uncharacterized protein	InterPro
MUSK	4.14	UniProtKB	H6VCG9, H6VCG6, H6VCG7, H6VCG3, H6VCG0, H6VCG1, L0CIK6, L0CKK5, H6VCF7, H6VCF8, H6VCF9, H6VCF3, H6VCF4, H6VCF6, H6VCF0, H6VCF1, F7FYQ5, H6VCF2, L0CKL0, A0A075QVJ2, H6VCI8, H6VCI9, H6VCI6, H6VCI7, H6VCI0, H6VCI1, U3JBU1, H6VCI4, H6VCI5, H6VCI2, G1P198, H6VCH6, H6VCH7, I6XEJ8, A0A059U581, H6VCH0, H6VCH1, H6VCH2, H6VCH3, G1JYN8, G1JYN7, G1JYN6, H6VCK7, H6VCK6, H6VCK5, H6VCK4, H6VCK3, H6VCK2, I6XQM7,…	Muscle-specific kinase receptor	UniProt
GCNT4	4.19	UniProtKB	I3LAJ3, W5PPM1, H9Z249, M3WRM6, G3RTA5, G1U325, Q9P109, G1L195, K7EYA9, G1N079, F6STG0, G1Q194, I3MJT2, H0X5N6, V8NQZ7, H2REA9, F6QXM2, F7IM95, A0A0D9SDI5, A0A096MKT2, G3X0Q4, H0VMX7, G3TX67, H2PFV6, E1C421, G1S9D8, U3KJH5, E2RPG5, F7FXW1, F1MC30, T2M3K9, U3BMT1, G1KIA8, U6CPG3, M3Z519, H3AT19	Uncharacterized protein	Ensembl
LAMA4	4.24	UniProtKB	H0Y351, G3STL1, I3M5W9, H3B5B8, W5PIM5, I0FJ45, I0FJ46, K7BFL3, F6ZDJ2, H0UI49, K7CWZ5, F6ZAN1, F1PR66, M3W5N5, A0A0A0MQS9, F1RZM4, H0V7J1, H0YAQ5, U3J2Y1, H9FKZ1, F1MYX9, G3S866, G3RGA8, H0ZP21, H9FG48, A0A096NDC0, G1MED7, G1RRG8, M3YFR5, H9FJ36, A0A0D9RSY8, I2CVN4, I2CVN3, F7BSA8, G1NU61, V8PFW1, U3BUE3, Q5D044, U3K8U2, G1SXN3, H0X4C4, K7CW88, F6YHF2, H9FHQ1, K7DB07, A0A0A0MTC7, H2QTK9, U6D7M0,…	Uncharacterized protein	Ensembl
SLC26A7	4.25	UniProtKB	Q5RAL2, H2PQS7, H0UZ45, M3WA61, F1RY36, F7D455, G1T3J0, U3JRY3, G3WP32, E1BXQ9, G1LKB1, I3LWD5, A0A0D9RK42, H2RC00, G3QUA1, F7G2J9, F6W2F4, F7G2N7, G1P0V5, G1QQI5, G3SD21, F7GJR3, M3YCL2, K7F364, H0YB61, A0A096NAV9, H0WRL2, F7DAU9, V8NUI6, W5PIL0, Q8HY59, A0A096N1D2, E1BD54, F7D446, K7F366, H0ZNM4, G1KBS4, Q8TE54, H0ZNM1, U3IWY0, G3THS9, E2RT82, G1NH94, A0A087WZI7, E5RFH2, E5RGL8	Anion exchange transporter	InterPro
EDAR	4.37	UniProtKB	G3SMB2, M3WH84, F7FLX0, F6PJS4, E1BBS7, H0ZGY0, K7FZE3, F6QP49, G1TFT7, U3JLJ7, U3J8N7, Q9UNE0, G1P9V5, G1KA40, A0A096NUD0, I3N0A6, G1LV60, E2RA80, W5NRS1, M3YH48, G3R5K1, H2P5C7, F1SU31, G3VCB6, H2R8N6, F7CJY8, G1NPQ1, H3A4R3, F7HQQ8, F7BGI7, H0XB54, H0VK61	Uncharacterized protein	Ensembl
PKHD1L1	4.47	UniProtKB	G1M2U6, G3RWM9, J9P647, E2RC70, W5PUE4, H2R9Q7, F1S1H9, G1Q4W0, M3X3Z1, F7FM12, F7C2F0, E1BIY3, H0WB44, G1TUG6, M3Y2W6, I3MPJ8, G3T0R4, F6QWH2, G3VK18, F6SXR1, Q86WI1, A0A096N326, H0WUF4	Uncharacterized protein	Ensembl
CD5	4.5	UniProtKB	A0A096MLK0, I3N6Y0, M3WJA0, F6PYA8, W5Q3P2, H6DA29, H6DA28, H0VYU8, H2R5E0, G3THR0, F1PJU1, G3URH0, H0Z7I6, H0XG40, H6D9X2, F1RIA2, H6DA51, H6DA10, E2QZ63, H6DA16, H6D9Y3, G1U1N0, P06127, F1NBC3, M3ZBY5, R4G9K9, A0A0D9R1U8, U3IL18, G3WAW6, G1QN53, G3WAW7, F7EXH7, K7FV63, K7GMU9, H6D9T5, O73906, G1N0V3, Q07452, W5MNK8, H9ZFB2, G1PWL8, U6DQ45, F6V5Q9, U3KC31, G3QUT8, H2ND90, F5GYK3, F7FWL1, H6D9U9,…	Uncharacterized protein	InterPro
COLEC12	4.51	UniProtKB	U3BYC3, A6QP79, A0A096MM98, F1PU26, K7FK19, F1NIN5, G3U5U0, V8NMM8, H2QE65, Q5KU26, F6TZ62, U3J8R0, U3D471, Q2LK54, G1P1P0, H3B614, H3B613, M3Y247, U3DP17, I3LZX1, G3TU05, G3WQY6, A0A096MS31, G3WQY7, U3CM60, J9PB51, G3QHQ0, M3WN82, E6ZJ36, G1KHR4, G3UNW8, G1LJ84, H2NW01, G1LJ83, H0VI62, U3EMH6, H0ZIV3, G1R560, F6RUR9, F7B187, H9F257, G1TYB6, K9J4M9, K7DRY8, G3T412, F7G364, H0WMM4, U3JUP5, M3XL52,…	Uncharacterized protein	UniProt
CD8B	4.52	UniProtKB	G3WCT8, K7GBV0, A7YW30, F7EFR0, F7C4A1, G1LTY6, H2RDK7, P79336, F1SVD7, K7GNJ6, U3K6G5, A0A096MR88, E2RHT2, F7C510, U3I4L7, W5QHU7, Q9XSM7, E2R8E2, H0WVW4, F7ETR1, F7EXY4, M3XG99, F6RFK3, H0ZKR1, P30434, P10966, M3YD30, I3M3P5, K7GNN8, G1SX39, G3SXF7, G1P0G0, H2P5J8, G3QWW7	Uncharacterized protein	Ensembl
TNFSF11	4.61	UniProtKB	G1KA15, E2RCC9, G3T755, K7FI74, H0ZQ49, Q4S9Q4, H2NJR7, F7HBZ2, G1T0I2, O14788, F7FPG3, F1RJX1, F7HBZ9, B5MGQ9, H3AHV3, G1PC89, G1TF13, U3K0A6, G3VE52, U3ICJ5, H0XYJ1, Q5T9Y4, F7BYM9, G1QM48, F7F5R8, G1NQ26, H3C648, W5PBU9, A0A0D9RYY3, R4GFC6, M3XRJ9, V8NDC2, G3R6F7, H0V3N0, F7HH08, H2Q7H7, F6X6Q4, G1LQJ4, A0A096MW11, E1BIP0	Uncharacterized protein	Ensembl
LOC102127228	4.63
TCF7	4.72	UniProtKB	F7FHL2, E5RG75, P36402, K7FBI9, G1TAJ9, H0YBM1, I3MFQ2, F6UY68, U3J6A9, H2PGJ9, M3W9K5, K7D5L3, E2RRW8, A0A096MV04, H0YAR8, H3BAH3, H3BAH4, H3BAH5, F6V4P6, H0YBP2, F6WDH1, E5RHL1, H0YBC8, I3MT10, F7AJQ5, V8P651, F6YSI7, F6UY35, F7A0W5, G3QYX4, G1P784, G1KB47, G3UB71, F7G9D7, G1R9C5, E5RJ51, G1R9C6, M3YFJ0, G3WWN7, G1N8L9, U3JZP8, A0A0D9RMG6, F6UY82, G3THP1, H9FG17, H2QRH6, G1MHH6, E5RGQ1, G1MHH3,…	Uncharacterized protein	Ensembl
LOC102118664	4.76
CXCL9	4.91	UniProtKB	A0A0D9QX99, A0A0A7KLG7, G1R9E9, G3VMQ7, G3VMQ8, H2PDN4, G3QPL9, F7HL04, G1LZ40, K7DZR3, A9QWP9, I3MLK1, H0X568, B0FYK2, G3UBF8, A0A096N5M1, F7I275, U6CTS9, A8DBK9, A0A0E3EKL8, M3W9G4, U3KNX2, G1P865, B1AB89, Q07325, H2QPQ1, W5Q4X6	Uncharacterized protein	InterPro
LOC101864901	5
FAM101B	5.01	UniProtKB	W5PQJ0, F1RHI2, M3XBG3, Q8N5W9, K7G5U5, F6UAR7, H0Z983, G3SBX6, H2QBS9, U3FQJ5, F7FTA3, G1PKK3, D2H8D5, H9KXF2, G3WI51, E1BVJ1, H0VEF5, M3YQN3, R0KAU0, H9GV76, G1TYE3, H0WQA7, H9H6A2, E2QWK7, U3JT43, I3MTF7, F6SVP0, G1N5A4, F1MEL7, A0A096P283, H2NS33, G1QI08, G3TG10, K7BMN1	Uncharacterized protein	Ensembl
LOC101925349	5.05
C3	5.12	UniProtKB	W8QQ18, Q5NKN5, J7JNY8, A0A024DC45, A4F1W1, K4PD76, H0W536, Q992L7, G0LXT0, H3BL60, P01813, P98094, Q8BA57, A0A0D3R3L2, W8PWP8, B5AG35, A4F1V4, Q8QYY8, O12278, Q9Z0D3, A0A0F6PCA5, Q0WX67, A4F1U7, V8NCP4, B5AG41, I7ITT1, V5UWD5, Q8BA63, F8K8M9, X2LD07, E2FHQ3, E0YU46, P14110, Q06F30, I0C066, H2E6P8, A0A0F7KPI1, X2D231, Q76C65, D5LNC3, Q9YPT0, G9HRV4, W8W349, F6WUL9, W0USA7, M5BEW4, K4JVS4, Q76C60,…	Replication enhancer protein	InterPro
HOXC4	5.2	UniProtKB	A4FUC1, H2Q636, F6PL05, F7HTX5, G9HPS5, W5Q435, G1T9L5, F1SR58, G3QTW5, I3N4H2, K7FA77, V8P2N2, F7I3I7, U3IUE2, P09017, H0XVF3, H2NHJ2, G1S7G0, D2HM48, A0A096N4V5, E2QSM9, G1PXH9, G1KKN8, K7DKU9, M3Y389, G3QJJ3, Q86TF7, A0A0D9QZG7, H0WAT9	Uncharacterized protein	Ensembl
LOC102137584	5.28
LOC102124763	5.29
RASSF9	5.3	UniProtKB	V8NJ28, G3U527, M3Y8K3, G3RQG5, W5Q1C5, G1QZZ8, G1NF61, U3CM61, M3W6V0, E1B705, F7G0Q6, G1TKZ0, G1LHN0, H0XWS1, U3I150, G1KKW0, F7BFQ9, U3KK68, G3TTI6, H2Q6K2, G1PZF0, I3N0I8, F7F529, W5UJZ2, H3AV66, F6VGC7, F1PL84, A0A096NPF7, A0A0D9QV18, O75901, R4GIZ3, H0ZC34, G3VXY5, H0VU93, K7FKH5	Uncharacterized protein	Ensembl
EBF3	5.34	UniProtKB	G1L9G7, A0A096NSU2, H0ZMZ6, F1SDK2, H2NC00, G3VB47, Q9H4W6, H0WWL2, M3XTM2, F7B416, F1PG23, F1MGH0, H2REV0, G3UQB7, G1KI56, G1QLI4, H0Y3W9, V8PHR7, F7DLR3, F7B409, A0A0D9QWN0, U3IYX3, Q6WSR6, M3XCK5, F7FV08, F7HQ55, W5PZY3, H0V4N3, G1SW51, K7GEY1, H2QRX0, K7DS63, K7D4Y4, H9H917, U3JEQ9, F7HV42, G1P4V1, Q6RUV9, F1NNP7, G3SZ41, I3M7A8	Uncharacterized protein	Ensembl
SFRP1	5.42	UniProtKB	I3MVV7, Q8N474, B5X4P1, H2R9U6, G3TIW2, F7ABF2, F1NPV5, J9NWM7, G3R7V4, U3JVC5, U3IEN2, K7FAD5, Q9DEQ4, I3LB66, F6QJQ3, U3ANW6, F7ESJ0, F1MDU5, G1MTR6, A0A0D9RRF9, G1RPU9, H0W7U1, H2PQ58, V8NK14, F6SGW3, F7ES25, F7EDT7, Q6ZSL4, G1PQ68, O19116, M3Y377, M3W3N2, G3WRF0, W5NWF6, H0XUD8, U6D8M5, F1PQL6, K7GNP5, A0A096MR77, Q05DS5, H3ANE4, H3ANE3, F6S6G9, D2H9Q0, H0Z429, H9EZL6, G1TKC8	Uncharacterized protein	Ensembl
TPBG	5.46	UniProtKB	H2QTB7, G1U6S2, F7G2X9, H0XKF6, G3MYT4, Q13641, G1NLW3, G1KYB9, E2QXI6, F6XQF5, G3TKD8, G3WH38, U3I084, Q4R8Y9, F6W3P6, R4GM46, H0W3J1, U3JJ46, A0A096NR13, F6ZDK8, G3SDZ4, H0ZQP1, I3N8V2, H2PJP0, M3Z577, M3XGD0, F7CT46, F1RQM0	Uncharacterized protein	Ensembl
LOC102121984	5.53
SBSPON	5.53	UniProtKB	H2LVA1, U3IDY6, F6RYM8, U3K1K5, K7GJW1, E2R4R5, H2U4W9, H2QWA7, I3KA23, G3RHB4, I3KA25, I3KA24, F7ITB4, G1NG45, F7ITB8, G1KPW2, A0A0D9RMB8, F1RWI4, A0A096NZQ7, G3NE94, H3A997, M3WH42, H3CRX7, G1T3E0, H2PQJ9, W5P652, G3TFM3, Q32L50, I3NAQ2, M4A7H8, H2U4X0, F7EB88, H0WSZ4, G1QKT6, A0A0B2UT43, H0VI19, W5JYQ8, F7AIW1, G3W1M6, U3BET2, M3YFR3, D2HKG5, Q8IVN8, W5M7Y7, A0A087Y4V4, F7F098	Uncharacterized protein	InterPro
LOC102144211	5.57
LOC102120006	5.6
LOC102133944	5.77
MGP	5.91	UniProtKB	G1QV38, Q5JCL2, U3K9W9, Q5JCL1, H0ZG10, F7INT5, H0V508, Q5QKS1, M3WWD9, G5E7B3, Q4G5Z6, A0A096MUP6, G1LSP3, C1BYH5, H2Q5I7, W5QHS2, O42413, G3WVP3, Q6QN06, Q4VWY4, G1NGY8, B5XA87, I3MGY5, G3QPA8, H0ZG05, Q9ZWA6, Q800X1, B7ZKE7, P47841, B7ZKE9, K7AMF5, D3Y2W1, G1P6J7, C3KK82, Q5RDP6, F6R013, G7N6F0, G1QV40, C3KGY8, A0A0D9R7Q0, M3YJJ8, B2ZSY0, G1KKI8, A0A024RAX0, F7E3F5, E6Y2M7, K7F705, Q8MJ39, H0X…	Matrix Gla protein	InterPro
CLU	6.03	UniProtKB	G1SQ27, F7GSJ0, E5RJZ5, G3SH91, F6S868, U3JI22, W5PZI0, P14018, P14683, M3XP98, W5PZI1, U3FG08, E7ERK6, G3VY12, K7CQT0, V8NR93, G3VY13, Q4G3Y4, G1P7N5, P25473, G1S3B8, G1KZV4, E5RH61, E2QYU2, Q8IWM0, F6S852, P17698, P17697, P10909, K7GNZ2, H0YAS8, K7GND8, I3NHG5, F6XFZ6, F6S885, F6UX07, F6S1X7, K7FAS3, H0VVP2, E5RGB0, Q9XSC5, Q29549, H3AKI1, H2QVY0, H3AKI2, Q6PTX2, A0A096N1Y1, F7GMD3, U3ISS8, H9G…	Clusterin	Ensembl
LOC101925495	6.08
MARCO	6.09	UniProtKB	M3WJY3, F7FRD1, G3T2A8, H2F098, G1NIA0, G1SRY0, E2RFD8, E2RFD9, U3KGT2, U3HYL8, Q9WUB9, Q9UEW3, F7H9E1, F6UT87, F1NDC7, M3XP93, H0XA92, H0V108, F1RY09, F6RX36, A0A096MTV7, U6CST0, F7FRB8, K7E9V5, W5PRY3, F1N7K7, G3RHS7, G1LPE8, G1PR59, G3WYB8, G1RMF8, G3WYB9, H9GBD5, A0A0D9RVH0, Q4ZG40, H3BD18, H3BD19, I3MPW7, H2P7D1, H2QIL9, H0ZMV1, K7F578	Uncharacterized protein	InterPro
LOC102139337	6.16
ECM2	6.33	UniProtKB	F7CGP9, K7DDU2, H2PSP6, M3Y032, G3VA88, H0XCF2, O94769, G1KIG8, G3SQ03, F7GKB0, I3MPE3, U3K344, H2QXG7, E2RPH7, W5PEH0, Q3MHH9, M3WGD0, F1MG02, E1BV71, F7IBX5, G1MYY9, A0A096P239, P38241, G3RCR6, K7GA64, U3IBQ7, F7C9B3, I3LU27, H0VVV9, F2QMS2, G1PRV2, G1SUW0, G1M4K3	Uncharacterized protein	Ensembl
PDPN	6.35	UniProtKB	U3K5R9, K7FCQ4, R4GLP9, K7GME5, A0A096MU39, G1LJH1, F6VJ96, F7BN63, G1SPW9, F1PEQ8, F7H3Q7, G3T5I4, H0YA72, G3R407, M3W7Y4, E7ETC6, F1SUY1, G9KFV5, J9NRY9, F1PIQ4, G3WRM2, Q95152, U3J504, Q86YL7, K7B166, F7BIW6, G1RFN8, G1PVU8, H2N908, H0YW99, H0WHC8, I3MMT6, H2PY31, A0A0D9S8J3, W5PMJ8, F6ZBL8	Uncharacterized protein	Ensembl
LOC102126730	6.63
PLA2G2A	6.64	UniProtKB	P14555, G1SRA2, G3QZ00, H2N8S1, Q8NI47, A0A0D9S8D2, F1NZ95, G1R8T6, P47711, H2PY77, G3WHY8, Q56JZ2, U3KN66, I3N450, A0A024RA96, Q0IIC8, E9FRS7, F7EHU8, F7GTB5, P14422, A0A096MTU1, F1SUN7	Phospholipase A(2)	InterPro
LOC102121214	6.67
LOC102129658	6.78
FCER2	7.13	UniProtKB	G1LPM7, W5NWQ2, U3J5G7, E1BIQ4, F6Z682, J9P3Z9, P06734, H2R6E7, B8YM31, F7CG81, F6Y6D8, G3QVR0, G3VZV9, G1TP10, H2NXB4, H0X786, G1QKB8, M3VWY1, I3MWG4, M3Y9S3, H0W3G3, G3U2S8	CD23	Ensembl
SELE	7.19	UniProtKB	F7CK37, H0X1X8, G3WA66, G3WA67, H2Q0K5, F6QAA7, F7F2X2, P98110, A0A0D9RFV7, G1RYG0, G3QSS4, G3SZI6, P16581, W5PN45, U3JZP0, U3IE35, A0A096NFN4, G3TX97, F7CK51, F6T1J6, F1PQQ9, A0A0A0MQQ7, H1A3X7, P27113, F6VQ34, F7CK28, M3YVQ9, P33730, P98107, G1PBS9, F6WRE3, G1MXK5, I3MCP3, G3N1F4, H0VLD4, Q95LG1, H2N4S3, Q5TI73, Q5TI72, Q5TI75, Q5TI74, F7CK44, F1RSC6, K7GIS5, F1NSQ2, G1LXT1, V9NJM3, F1PQP7	Uncharacterized protein	Ensembl
SIGLEC15	7.25	UniProtKB	M3XPH8, G1MRL5, F1RPU4, G1U4W2, I3M0N2, U3K2I8, Q6ZMC9, H2R6R2, F6WUM5, G3WW17, G3QXS6, K7FWH6, F1NG06, G1MP99, H2NW92, F1PHP5, H0XX64, F6RZS6, H0YTN5, W5NWN7, F7ETM4, V8N422, F1MXR4, G1P3G1, G1KN01, F7GNV8, M3WXJ3, H0W3Q5, A0A096NS20, U3IXE5	Uncharacterized protein	Ensembl
ANKRD37	7.27	UniProtKB	F7IJY2, F6TQ70, G1T357, Q7Z713, H0Z8W2, F1RZN8, U3KBK6, I3MK84, H2PEW2, K7G8F9, G1LFB4, G1P658, H9H502, F7CHQ6, H0WD38, W5PD63, Q0VC93, E2R748, R4GBV2, M3WZJ2, M3YIE6, A0A096N209, H2QQI8, G3QQ91	Uncharacterized protein	Ensembl
IL7R	7.36	UniProtKB	U3II59, H2PFB9, G1N9Q7, D2I6N7, A1EA95, P16871, E2R536, F7G3H6, K7GLC0, G3VXC4, G3VXC3, D6RGV2, F7A0L8, H9GEL3, G1T184, M3WAZ4, F7FJP7, F7DGM3, A0A096N4Q6, V9NJB8, F6ZUE8, G1PEK7, M3YUE3, A0A0D9RWV1, H2QQR6, Q38IC7, K7GLT0, K7FR21, E1BPM3, A0MSX9, G3TAD6, U3JHB6, I3MHP3, H0YUU0, H0VAR6, G3VXC5, W5PNL9, G1S1H3, A5HJM1, F1SNC0, F7G3I0, G3UPK6, G3RFX0, G7MV35	Uncharacterized protein	Ensembl
EPX	8.02	UniProtKB	A0A096P4S9, G3SQS0, H2NTI5, F6YME0, H0UU31, F6YEM5, H0WUV9, F6RBT1, G1PSI9, F7H275, I3MEL2, M3YV96, H9KX95, U3KH38, G3WGK2, G1SYD4, G3QKU8, H2QDI6, A0A0D9R017, P11678, F1RSB4, K7GNQ2, P80550, G1LZQ3	Uncharacterized protein	Ensembl
MEOX1	8.02	UniProtKB	F7AC26, G3SRM0, F1S1H4, W5P6W7, H2NTW4, E2RFP2, G1R159, F6QMP9, A2T779, G1KD69, G3W2Z8, A2VDR0, H3AG85, P50221, G3UTX0, H0W4T6, F8VXS6, U3I4L3, J9NTN1, A0A0D9S161, G1SIP0, A2T6S5, A0A096P5Y3, Q58CR9, F6PKE6, M3YE37, M3WCC7, G3QKL7, A2D5U4, U6DCW2, A1YGA4, H0YXK2, A2D6C4, A1YF31, H2QD53, D2HCT9, A1YFL5, I3MLP2, U3JDJ8, A2T7T2, F7BW00, K7FE17, E6ZI03, G1NSH9, H0WWT8	Uncharacterized protein	Ensembl
TIMD4	8.12	UniProtKB	Q96H15	T-cell immunoglobulin and mucin domain-containing protein 4	UniProt
TBX1	8.58	UniProtKB	H8WG16, U3I3B1, G3TP23, A0A034WQC7, G1T7G5, H3B9I0, A0A096MQD9, H9H7W0, U3I3B3, U3K032, U6DBW2, H2P3M6, H0WN33, D9ZGG0, A0A0D9RH90, H9GZR8, H0ZDJ5, W8BBW1, O43435, G3VRD9, F7G1H7, F7HZN4, Q152R5, K7FLF3, G3UBV5, F7H2S0, F7H2S2, A0A0C9R4F7, H2QL89, G1LYH7, H2QL87, M3XXR9, F1PEL4, H0VLN1, H2QL88, G3R1B5, I3M4D8, M3W425, G1R0F7	T-box transcription factor TBX1	UniProt
DPT	8.79	UniProtKB	E1C203, M3XN53, G3QLX5, E2RPQ6, H0X0Y2, G1SNC7, P19427, H2N4T8, H0ZT84, F7H1N1, G3T834, F6T5W1, G1QAH1, G3VE98, F6PKC8, H0VAD5, G1NNG0, E5G725, U3JT48, F1RPV5, G1KKE7, D2I5K4, R0KYN8, H2Q0J9, P45846, F6T2K8, F6YIZ6, Q07507, M3XE34, A0A096N847, I3NF45, G1RY31, W5PHI8, K7F2C9	Uncharacterized protein	Ensembl
NR5A2	8.86	UniProtKB	F7DCK8, H2ZSR0, F7FQ72, G1FEX2, F1MCM4, A2D699, A2D698, I3N0T2, F7FQ78, A1YF04, U6D172, I3PFL9, A1YF05, F1NVB5, H0VD36, W5Q376, A1YG80, F7I3V9, A1YG81, B6ZGU9, A2D5S2, A2D5S3, G3WD27, F7FQ82, F1PXN4, A0A0D9RMJ9, G1SQL6, H0XVM2, G3T2J8, C1LEJ9, V8NTR4, I3LCV8, G3R3Z2, A0A096NRJ5, H2Q0V0, I3PFM0, G1S8W2, H9GB98, A2D4Y8, F1D8R9, A2T6Q0, G1N2K3, A2T6Q1, H0Y328, U3IP55, H2N494, L7P7A2, A2T6Q2, O42101,…	Uncharacterized protein	Ensembl
CCR7	9.08	UniProtKB	G1LNB1, T2EX19, I3MYW9, G1KS56, U3IK87, U3JC82, T2EX10, F6R3A6, Q8HZR6, H0YVU9, G1TKJ1, M3ZBQ7, T2EW82, W5U649, Q861S1, F6ZL32, G3UPC8, C0ISS3, T2EVA7, H2NU74, H2R9P0, J3KTN5, T2EWA2, H3AZU2, V8P6M6, G3WAF3, T2EWB0, T1WWB5, T2EW93, U6DW31, M3WBU1, G1MV68, T2EX40, M3YTA4, T2EW00, H0WJ26, B5LYN8, K7GS30, G3RJP4, F6WHR2, T2EWB3, Q6JXL2, W5PZG4, A0JNA6, A0A0C5B8N8, G1QN17, H0VL65, J9P893, K7F3F2, F6S…	Uncharacterized protein	Ensembl
ADIPOQ	10.44	UniProtKB	A0A096N8Y1, H2ZST1, H0Z4X0, F7HZV1, B1PSB6, U3J1G3, Q3Y5Z3, G1R4J8, G1TV17, F7CP25, M3WJN6, H2PCA3, G1NTA9, F7DZE7, K7FLB7, G3SSS5, T1RTP2, A8K660, F7HQ03, H2QNX5, A8VFH5, F7AV97, U3JN22, V8NK12, G3RBU7, Q15848, I7DBK6, I3MQS1, F1DFP3, U5LUM1, A0A0B4J198, G3WDL2, U5LUG0, D2H071, M3XW64, G8Z0F2, F1NRD4, H0V0A2, W5QH34, G1KAQ4, A0A0D9RA24, H0WIJ9, G1MY58	Uncharacterized protein	Ensembl
SFRP5	10.97	UniProtKB	G3X0D7, A0A0B2V2J0, V8P257, U3IU58, G1KZP0, F1S8X3, F1NM64, H0ZH09, F6W1J0, G3RA14, F1PTH8, G3TBQ4, Q9XSC1, A0A0D9R0I9, A0A096P623, G1RVW8, H0WC91, H2NB79, M3XBH3, M3Z016, I3MIK5, R4GA13, G1KBI3, F6XE52, F6S5A2, F6QS02, G1TPA7, W5PNV4, U6D871, G1Q6H4, Q5T4F7, F6ZL04, G3S9J0, G1NBK0, H0XGS5, F6XE06, U3K111, F7DU06	Uncharacterized protein	UniProt
ADH1B	11.22	UniProtKB	F7GFY3, F7FRW2, A0A024RDI5, A0A0D9QVS8, P00325, F6T443, F7G460, F7GFZ1, F6TDH2, Q5R1W2, P14139, F7G3Q7, A0A096N1P9, A0A096NFB0, H1A2P8, F7G3S8, A0A0D9SFH8, K7D361, U6DNU5	Alcohol dehydrogenase IB (Class I), beta polypeptide, isoform CRA_a	InterPro
CCL19	12.16	UniProtKB	R4GM50, G3WY67, F7BIX7, Q5VZ75, Q68AY7, G1LK30, F7BQ31, G1QXY6, W5PH69, G3UCE9, Q8HYP7, G1SFK8, M3VZU2, H0Y0W5, E1CFG0, C1BXR8, C0ISS1, D0Z5W4, U3K5A9, C3KGZ7, B5XFI2, Q6IBD6, H2PRV6, A0A096P1A3, I3M188, B5X9I2, H0UYZ8, A0A0D9RCV0, G1NZC0, Q99731, H0WUN7, H2QX71, F1PBW3, G3QKB7, M3XZH0, F6QYE4, E1CFF9, F7HQD5, U3ICI2, F1S3U4, Q3ZBN3	C-C motif chemokine	Ensembl
TMEM200C	13.22	UniProtKB	A6NKL6, H9FG00, U3D7K8	Transmembrane protein 200C	UniProt
TBX18	13.57	UniProtKB	U3KQQ9, H3B898, W5UIM5, H3B899, A2T7K5, A2T7K6, W5PUZ5, G1SGN4, M3WHB9, I3NEM7, O95935, A2T702, A2T701, A2D5Y5, H2PJQ4, A2D4S7, A2D4S6, F7G3W4, E2R062, A2T6J0, G3WB37, U3IUU8, F6PPW8, U3KQH2, V8P592, U6DDA3, A2D5L6, G3U2I0, F6V643, G1NLT1, R4GG27, A1YFF9, H0WPL4, A2T6I9, A2D5L4, A2D5L5, G1PI04, Q8IW86, G3SJ68, Q68SB0, G1KCC3, G3RWB2, A0A096NF47, F7CBJ4, K7G3Q5, G3UP02, M3Y1V6, T2MHK7, H0VBC8, A1Y…	Uncharacterized protein	Ensembl
LOC102123952	13.61
LOC102127387	13.64
KIAA1199	14.26	UniProtKB	H2NP06, H9FLH7, H9FLH6, H9FHN5, F1P1G6	Uncharacterized protein	Ensembl
HOXA9	15.53	UniProtKB	D2GVB8, B2KIN0, A0A0A0QG50, F7F2R2, H2QUB8, H2QUB9, U3K481, G1U7A4, F1SHT5, Q9IA26, F6YAJ9, G9HPP9, G3QIH8, M3W8P0, U3BBC2, F7GIC4, F6U6C7, I3N2Z8, P50209, H0VX44, U3IUW2, H0YXI1, Q98924, F6YAL2, B5SNP4, H2RI01, H0VJ03, W5PIW4, P51783, A7Z086, B7NZT7, B1MTY5, M3Y0B9, H3BCY3, E2R520, A0A0D9RP91, A9L942, H2R5F9, G1RY99, P31269, B3RFG4, A8MVF3	Homeobox A9	InterPro
CLEC10A	15.84	UniProtKB	Q8IUN9, A8K7G0, A0A0E3EKP6	C-type lectin domain family 10 member A	UniProt
LOC102130221	15.94
SHOX2	16.01	UniProtKB	I3L828, F7HME0, F7HME2, G3X1P6, H3AIX6, G1QVM6, K7F996, H0WY53, G3RNS2, M3XUR0, G1M4H2, I3MEV9, G1QEK0, G3R7K9, U3JQ69, A6NLG4, H2QY89, G3TWZ8, H2PBU5, M3WP37, G3TQW4, U6DHW6, F7HMF0, G1KFR4, A0A087WVB7, R4GKQ9, F7HMD6, W5NX78, E1BLB9, F6UK79, K7E443, O60902, U3KPJ5, A0A0D9RI66, H0ZLU4, F7GAS6, A0A096MVU4, F7C7M7, H0V7G0, F6Y4K5, G3TJM1	Short stature homeobox protein 2	InterPro
CCL22	17.36	UniProtKB	A0A0D9QY04, J9NUK8, M3VZF4, G7NPU2, G1T9I5, A5PKF1, G3WQG3, G3QZ89, I3MF51, G8XRI5, M3XZ46, G1QR86, F6RRS0, G3TBM7, O00626, U6CT06, F7FG83, F7D771, F6V9H7, G1PT49, H2QB67, W5NPF7, G1MEX2, F1RF20, H0V3D7, A0A096NIR4	Uncharacterized protein	InterPro
SOSTDC1	18.39	UniProtKB	G1KMT3, W5PF09, F6T7A1, G1LV72, F1PUT3, G3R2X4, Q5R5D2, G3UMC2, H2RCY3, G1S2Y8, G1T3J2, G1PR45, M3W2N9, A0A096N248, A0A0D9RLU8, H9FAM3, U3IJE8, V8NPW7, J9P1A3, F7BAK0, F6W1Q4, U3K5U4, F7C9I3, H0WWM3, Q2HJ20, G1Q5A8, H3ARS1, F6USK0, A4D125, H0YWE6, G3USU1, K7FLU0, Q6X4U4, F6USQ7, H0VRZ1, I3M2D3, Q6VYA3, M3YRF8, G1NCI5	Uncharacterized protein	InterPro
LOC102138639	19.17
LOC102120328	20.38
IRX3	21.37	UniProtKB	G1MD94, H2NQW9, A2VDX5, A0A0D9QZ17, G3TRJ9, K7FHX7, G3U091, I3MRY9, P78415, F1RF01, W5Q991, H0Y0Q0, M3XW79, U3HYD2, F7INF7, F7INF1, H0VD52, J9NST5, K7FHW5, F7D0A0, G3T5Q6, H2QB38, U6D019, F6UIP9, G3WH77, F7FAB5, G3RDV6, H3AUS5, A0A096NIE4, A0A096NIE6, G1QKE7	Uncharacterized protein	Ensembl
MEOX2	22.85	UniProtKB	M3YRG6, F1NM26, H0YWD9, G1TP72, F6YFS8, M3WPT8, U3IIS0, G3S7C0, U6DPH3, I3MB52, H2QU74, G3W7A3, G3UDR4, G3TZZ0, H3CHD8, P50222, F6Q253, H2PMS4, A0A0D9RLT1, G1NCH1, W5PEL5, F1SEJ3, A0A0C9RLF0, A0A096NW75, G1TJS8, G1KMW8, G3PGW3, W5MZP5, H3B3Z6, U3K5U7, E2RDU9, Q6FHY5, H0XXX9, H0W094, T2MFY7, G3QTT1, K7FKY4, G1Q6E9, D2H6P7, A4D127, A5D7C5, F7BML3, F7C188, G1S2X0, F6T730, F6YFV9	Uncharacterized protein	Ensembl
HOXA10	27.27	UniProtKB	B2KIN1, F7EBV4, G1S9M9, W5PIV8, F7DWB8, C1FXY8, C1FXY7, U3IUV5, G1LH07, Q9IA27, G1QCJ0, G3TS72, G9HPP8, A0A024RA37, G3QIH9, M3WSY7, H2QUC0, P31260, G3N0G1, H2PMK0, F6YAI9, U3K473, F6RVJ6, M3Y0C5, B5SNP5, F1PZW4, F6RKN3, B7NZT9, G1NS38, B7NZT8, B1MTY6, B0VXK8, G3UAR0, A9L943, F6URM4, H9GUB9, A0A0D9RP95, H0YXI2, G1T8V8, A6QPA5, I3N1S3	Homeobox A10, isoform CRA_a	InterPro
LOC101866979	30.41
SHISA3	31.39	UniProtKB	A0PJX4	Protein shisa-3 homolog	IntAct
CLEC4G	33.84	UniProtKB	M3VWY2, K7GJS4, A0A0A0MXK8, W5NX54, E1B7F4, Q6UXB4, K7E579, F6U8K9, G3VT54, H2QF72, G1TBB7, G1KTH1, I3LXF1, H0WS94, E2RPS1, F6WQX6, G1LPP1, G3SIF2, M3Y9R7, G3TPP2, B8R2Z9, T2MAL4, H0VN56	Uncharacterized protein	Ensembl
CX3CL1	55.51	UniProtKB	A0A0D9QY02, A0N0N7, I3L9Z6, R4GGI2, A0FEV8, H2NR02, G1ST53, F1N6Z2, F7D761, G3WQJ0, H9FCY1, M3W2N2, W5NPL3, Q0JRI2, G3TNC5, F7CTW3, G1QRA5, E2RTH0, G1MEY7, Q6I9S9, F6VVH2, P78423, J3QRA1, H3BSR6, H2QB68, M3XZ54, I3NF67, V8N8W1, G3QE79, H9H2N5, H0XH65, A0A096NIR6, U3EUX1, F7FGH1, H0V3D9	Uncharacterized protein	InterPro
LOC102116064	64.06
FZD10	64.88	UniProtKB	G1SAN5, F1NFC8, F1PWM8, V8N6J5, G1LJ15, G3WWL4, H0XTN9, F5H450, Q9PWH2, F7EZ48, H2Q772, A0A0D9SC80, U3KJS7, F6QEW9, K7EX69, A3KMX5, A0A0B2VHM5, A0A0A9YI37, H3BHV4, Q6NSL8, U6D001, U3I0C2, M3XAQ4, A0A096NAU3, G3U582, H2NJ49, I3MUX1, F6VL64, V5H3Y4, H9GKW6, Q9ULW2, G1MTZ7, M3XZ91, F1RFQ3, F7EAW1, Q4SXY4, H0Z302	Uncharacterized protein	InterPro
LOC101865881	97.06
CCL17	106.19	UniProtKB	H2NR03, A0A0D9QXZ8, G1PT51, Q8I021, F6X118, H2EP71, I3MP74, Q92583, F7E988, F7G3N7, M3XZ65, G8XRI4, F7D5R2, Q95N01, G3SPV8, H0V7J2, W5NPQ5, Q8HYP9, H0Z4E8, H2QB69, G3WR43, H0WVB6, F1MIF0, G1TQN0, G1MEZ3, A0A0A0MPY6, E1BSY1, G1MEZ0, A0A096NIR8, G3QHG8, F7FQW5, I3L8X8	C-C motif chemokine	UniProt
CCL20	∞	UniProtKB	H2R2S1, F6PNA7, G1SE89, U3IKR4, B9ENE0, C1BX70, Q8SQB1, A0A0D9R416, B9EMJ9, B9EMS0, F7FKP5, H0VGB0, W5QHB2, C1BYQ3, K7GQH9, C1BX16, R4G9F3, F1PJ27, W5MIY6, B5X5S6, C3KH33, K7E0V8, G1RSZ0, B5X7X5, J7K1T5, D7UPN1, M3W0B0, G1P5E2, B9EPW9, G3W5K3, K7FB05, F6ZJH5, U6CP67, G1N2K2, A0A096N8Z6, M4AXU2, A0A087XUN8, A0A096M4S7, I6TB79, F6VV22, F1SNM0, I3JVS3, Q5K4L9, P78556, C1BY02, B9EL65, G3S3G7, U3JWT9,…	C-C motif chemokine	UniProt

## Sheet: Thymus vs. Lymph
Differentially expressed genes in Thymus vs. Lymph
Gene Symbol	Normalised fold change (+ upregulated in Lymph; - upregulated in Thymus)	Annotations - Database	Annotations - UniProt Accession	Annotations - Database object name	Annotations - Assigned by
CALML3	-∞	UniProtKB	U3B879, H2N9N7, G3VSM7, F1MNC1, G1PUG5, H0VQP0, F1PIN6, H2Q1K5, G1SAF8, G3SZT1, I3MB47, P27482, F7DXU6, A0A0D9SCH5, M3Z785, W5PG97, U3KKJ6, K7F057, E0V8C9, H0YUN1, F7C0H0, F1P596, M3VV21, G3QV05, F7A4H0, D2HEB4, U3II03, G1DG98, A0A096N7J2	Uncharacterized protein	InterPro
CST6	-∞	UniProtKB	A0A023ZDR8, A0A0C5XW09, G1TIT6, K7E4J7, A0A0C5Z9V8, A0A0C5YDY1, A0A0C5YTV4, P40535, A0A0C5Y2L7, I0FHZ6, F7FG59, A0A0C5XG67, A0A0C5XKQ6, A0A0C5Y652, A0A0C5Z2U5, A0A0C5Z365, H0XFK1, U3DRM4, A0A0C5YEA1, A0A0C5Z892, A0A0C5Z8P5, A0A0C5YNS6, U3CIH9, A0A0C5Z5H8, A0A0C5YY62, G1MFT6, A0A0C5Y5M6, A0A0C5YPV1, A0A0C5Y4U0, A0A0C5Z471, A0A0C5XTY5, A0A0C5Z5X4, A0A0C5Y6U6, A0A0C5Z201, A0A0C5Z5D9, A0A0C5YHR8, A0A…	Cst6p	InterPro
LOC102115260	-∞
LOC102124703	-∞
LOC102129601	-∞
LOC102130746	-∞
LOC102132411	-∞
LOC102133245	-∞
LOC102138832	-∞
LOC102139015	-∞
RNF186	-∞	UniProtKB	H2N8S4, Q3T0Y9, F7F897, F7G591, G1MKZ7, G1SPQ4, U3KKC5, M3WL86, H0XJ98, A0A096NQM4, F1PT74, A0A0D9S928, R4GL22, F6QDV0, H2PY74, F6UNG5, I3MQY2, G1N1J9, H0UVK7, F1N5S1, U3I010, W5PIN2, G3UN15, Q9NXI6, K7F1H3, G1QFZ9	Uncharacterized protein	InterPro
SCGB3A1	-∞	UniProtKB	F1S5Q5, F7I9S4, M3XNC8, F6YTT8, G3VVP3, G1QPH2, G1L299, G1T0N0, G3R1S8, H2PHM8, H2RF19, G3T4N5, Q96QR1, H0WJ67, F6YJG8, H0VYP6	Uncharacterized protein	Ensembl
LOC102131858	-5502.86
PRH2	-5361.7	UniProtKB	O97024	PRH2	InterPro
PRH1	-3730.55	UniProtKB	O97021, P02810	PRH1	InterPro
LOC102132137	-3378.71
LOC102118858	-3161.06
AMY2A	-2969.18	UniProtKB	H2RI17, F7H0E4, H2RAM2, G3T5P8, A1IMI2, R0L136, I2CT82, U3E457, F1NF53, Q3MHH8, H2PZI6, F7HFY0, H2PZI5, G3U6H7, H7BZQ8, A8HDH1, A8HDH0, P04746, G3WFE8, H2P0W1, F7GYU4, A8HDG8, Q0D9J1, F1MP21, F7DYB1	Alpha-amylase	InterPro
CST4	-2636.5	UniProtKB	H2QK34, P01036, F6VIW1	Uncharacterized protein	InterPro
PRB3	-2114.04	UniProtKB	Q04118	Basic salivary proline-rich protein 3	UniProt
LOC102116355	-2010.34
ZG16B	-1871.84	UniProtKB	F6X6N8, Q96DA0, H2QAE4, M3WLV0, G3VMN6, H0W3U4, F7DNM4, H2NPW0, G1MI41, G3QXF7, H0WHK2, F1Q2Y5, K7FD84, I3MGB1, G1RE46, G1U8R8	Uncharacterized protein	Ensembl
LOC102118601	-1795.17
BPIFA2	-1715.48	UniProtKB	M3WM45, G1M3A7, G3SL41, E2QXJ0, F7HNK7, F7DU87, F7A7I4, I3NBY3, I3MSV7, G3VS27, G1PVK6, H0X3C5, H2R1D8, A0A096NUW0, I3MXN4, M3Z2D3, A0A0D9RIU2, G3RLT8, Q96DR5, H2P1M9, G1RFQ7	Uncharacterized protein	Ensembl
PIP	-1594.43	UniProtKB	A0A888, A0A889, A0A885, E0A2W0, G5E6U7, P12273, A0A890, M3YAF1, Q5U7L0, G1PH05, H2PNU9, P60987, P60988, P60986, I3MX79, W0ZED3, X2GB08, F1MCV8, A0A098G5Z3, A0A023T7Y7, P60989, F4IFH2, A0A061SBK3, H0X9D0, E2R0H6, G1QRT8, F6V6R7, A0A061RL26, Q3I1T0, Q3I1T1, P60990, Q3I1T4, F7HLA8, A0A096MQ32, Q3I1T5, Q3I1T2, Q3I1T3, I3MFS9, Q3I1T6, Q3I1T7, A0A0D3BDN3, F6UMA2, Q9XFJ6, Q9XFJ7, P93732, A0FI89, A0A0D9R…	Aquaporin	InterPro
SMR3B	-1467.08	UniProtKB	H2PDI1, H2RA49, G3R0L7, P02814, G1R805	Uncharacterized protein	Ensembl
MUC7	-1190.96	UniProtKB	G1R818, F7IN52, F6T1Z0, M3X563, A0A096MV70, H2QPL8, G1LGU4, W5PNK4, G3RAV2, J9P2K8, I3MIB6, H2PDI3, Q8TAX7	Uncharacterized protein	Ensembl
CST5	-1124.05	UniProtKB	G1RZZ5, P28325, F6VIZ9, G3RKA9, H0Z6K2, F7HAW3, A0A096NVT6, A0A0D9RF23	Uncharacterized protein	InterPro
KLK1	-939.13	UniProtKB	F7E0I1, G3QGD6, A0A034WG52, Q6H319, F7A5S3, H0XRZ4, F1Q0B8, F7GYN8, F1Q0B9, A5A2L9, A0A0A0MUM3, I3MTF1, Q07276, A0A0D9S527, H2NZT5, W5PXS8, G1R193, Q5FBW2, Q6H320, I3LSM8, F7A5N8, C9DFG0, Q28773, P06870, A0A0C9R1B5, Q6T776	Kallikrein-1	InterPro
LOC102139343	-764.54
LOC102134962	-432.25
LOC102139673	-333.97
C5H4orf40	-289.37
CA6	-275.01	UniProtKB	W5PHI2, F7CPH5, M3W976, G3QX28, I3MIF8, G1RDD0, G1RDD4, H2PXY2, B7X749, G3TMC4, W5PHH9, F6QL01, H0VSR1, U3JY25, F6QKX6, Q865C0, A0A0D9S8Q5, M3XJM8, H0WS17, Q3HRV1, F8W148, H3B770, G3SEJ4, G3S576, F6UY71, P08060, K7FPC7, F1PCG9, G1LB40, K7FPE1, B7X727, F1NZ64, F1MBS0, Q8N4G4, G1NVH7, G1MXB4, A0A096NGE1, F7C4N2, A0A0A1WKY1, F6Z8T0, H0Z096, I0FUZ2, M3Y4R6, G1T3M6, H2N980, P23280, F1RIH8, Q94IM7, P18…	Uncharacterized protein	Ensembl
LCMT1	-273	UniProtKB	F6RCY5, Q9UIC8, F7BYQ0, A0A096NHH7, U3ITB5, G3QYE2, H3BUP7, I3L537, W5QAQ5, G3SQB1, Q5ZII2, H0Z764, G1N3T0, F7I973, F7I972, A0A034WMN9, F7ATD3, F6V2L2, B5XFK5, F6UVY3, H2NQG1, A0A0D9R2D1, G1TWW0, I3LWK7, A0A0A1WLD7, E3TCB0, U3JM05, H9Z2C0, M3X0S2, K7FBW6, F6RCW2, K7CWF6, H0WRB0, V5IAP5, E3TE63, M3YJ44, G3SID5, M3YJ43, V8P669, F7I6X9, H9G5U3, I3L2Q8, H0VLQ5, J9P9V1, I3L4A2, U6DNQ8, G1LK62, F7F200,…	Leucine carboxyl methyltransferase 1	InterPro
SMR3A	-270.66	UniProtKB	Q99954	Submaxillary gland androgen-regulated protein 3A	UniProt
LOC102142723	-269.8
LOC102118224	-260.94
LOC101926534	-225.71
PIGR	-201.77	UniProtKB	F6WY82, G3X1T4, F6Y6T8, F7ATQ5, G1PXJ0, Q29244, G1MWU7, F6YF50, H0VDZ0, H0YS42, G1QJI5, P81265, H0WP54, U3J7K6, P01833, P01832, K7F6W0, M3W5Z6, H2R4D2, G3TAM0, G3R3E4, H2N3W9, H9GDA1, I3M809, G1T763, U3JCR7, F6WEB5, A0A096MW86, P85296, M3YER0, F6W2K5	Uncharacterized protein	Ensembl
AZGP1	-187.12	UniProtKB	A0JLQ0, P25311, H2PLK8, F6W5A5, H2QV12, G1LXN2, C9JEV0, W5Q9A2, F6YWS9, A0A0D9RZ11, G3WY24, G1TN25, G1RKK6, G3QHX6, G3TM25, G3S2B9, F6PMH2, H0VV72, F7CAB8, A0A096N8U6, Q3ZCH5, F7AYJ9, I3NEW7, M3WPT0, H7BZJ8, F1RNP2, F1PDJ7, M3YHL1	Uncharacterized protein	Ensembl
KRT23	-156.53	UniProtKB	H0VI99, H2QCX6, F7BUY6, G1NZD1, F7H278, F7GFR0, A0A024R1X9, H2NU62, F7BHV6, G1TE82, W5Q1S9, M3YT52, E2R226, F7GFR7, H1A4Z7, F7GFP5, H1A518, G3VVR8, U3IMU2, M3VXR4, J3QR55, F7B1T5, F7DML0, A6QP62, K7EPI0, I3LHI0, U3JC51, A0A096P5J2, Q8TC04, F1MI65, G1QPA9, I3MLP9, H0WM36, G3RNV9, H3B3U5, A0A0D9S2W5, G1MVN7, Q9C075, R4GBD3, F7BUY0, U3DBV1, G1LP05, K7F3Q7, G3SYZ6	Keratin 23 (Histone deacetylase inducible), isoform CRA_a	InterPro
EPPK1	-143.52	UniProtKB	H9GTP6, G3W1A2, F7EDB0, F7H978, A0A096N9N1, A0A0A9YFQ4, H0ZYY1, G1LIC1, G1TUM2, K7E154, A0A087X1U6, G1MY53, P58107, W5Q3C2, G3TUP2, H2RII3, U3JFC3, H2RID3, A0A075B730, A0A0D9R933, G3TNL7	Epiplakin	InterPro
SIX1	-139.52	UniProtKB	Q15475, F7A9E0, G1RTX3, J9P3S7, A2D4P2, H0VTL6, W8E7D5, A2D5X6, G3TCC7, F1NQK9, I3N0V4, H2Q8E8, A2D628, Q4RM36, H3BGT3, A2T6X0, A2T6F3, U3EK03, F6W7Q8, U3JLD7, U6DJ01, D2GVS4, A2D5H2, G3WSV0, M3XF50, F7I8P1, F6PGL1, A1YFD3, K7DJ14, A0A0D9RNX4, G1T717, M3Y4V5, H9GTH4, H2NLF2, A1YER0, A1YFX7, W5QJ07, A2T7G7, G1NXL5, Q08DI4, H9ZCI8, H0X817	Uncharacterized protein	InterPro
NUPR1	-133.39	UniProtKB	A0A096NHT7, G3WD34, O60356, U3FHX8, Q3SZ17, F7EIW4, M3WGP0, I3M3I7, H9FSV6, F7CRG9, G1QLS0, G1U8V6, G1NTV0, G3QD60, H2NQJ2, H0WHX4, W5NYZ3, H3AAM2, G1MA73, F7BQY9, H2QAU4, H0V1L8, F7C0N3, F7FEK1, F6ULV2, G3U7E6	Uncharacterized protein	Ensembl
C11H12orf39	-128.95
HTN1	-123.65	UniProtKB	G3QQV0, P15515, C0LRB4, P34084, C0LRB3, H2PDH3, C0LRB2, C0LRB1, H2QPL1, C0LRB0	Histatin 1	InterPro
KRT8	-101.03	UniProtKB	V8NZL6, M3VUH2, G3SEY3, B0VXH6, G3VJ06, F8VUG2, E6ZFH1, F1MU12, K7FDH1, F1SGG2, F1PW98, G3RFE7, A0A096MSQ9, H2NHF0, F8VQY3, W5Q5N9, Q28810, F8VP67, F6U9A3, M3Y4Y5, Q969I0, F8W1U3, F8VRG4, A0A0B5CU18, G1SS18, P05787, P05786, F6Z4D6, P86247, Q5K2N3, I0FGQ6, U3JP89, F6SIH9, W8VYE7, G1S7N4, H2Q608, G3UKR5, H9KZP2, H9GI12, I3ND60, G3UDF6, H0YIB2, F6QF50	Uncharacterized protein	InterPro
LOC102136182	-99.46
C19H19orf33	-96.55
ELF3	-95.67	UniProtKB	A0A0D9RNM1, G1ST72, W5NQW0, D2GZM6, G3U0Q9, M3XKE7, G1S8Y7, G1S8Y6, O82804, V8P7H1, A5PJQ8, H0WDH7, A0A096N6I9, U6CU79, G3RE61, P78545, F6XM40, F6TYX0, E1C6L3, I3MY20, H0YSH5, G1KCK4, Q5SR36, H2Q0W5, F6TSN0, F6ZTC4, F1S5B5, K7FVK4, H2N465, E2R715, F7IHW5, U3IA46, H0WQP5, G3VD68, H3B3L6, A0A024R974, G3TJE3, U3JJ74, F7CT48, M3YHN8, M3VUS7	E74-like factor 3 (Ets domain transcription factor, epithelial-specific ), isoform CRA_b	Ensembl
S100A14	-94.83	UniProtKB	W5NWK8, H2R1X6, A0A096N926, Q3MHP3, E2RP88, M3W932, U3IR43, G1SI77, G3W7C0, U3KBZ8, H0X369, G3RL58, G1RHH1, G3T8J8, F6SL53, K7GKQ4, H0VPK1, I3N4Z3, D2HJR1, A0A0D9S5N4, G1NWG7, H2N5N7, W5ULK6, F6QQX3, F6PSP1, Q9HCY8, H9H1E6, F1SFV3	Uncharacterized protein	InterPro
CLDN7	-92.67	UniProtKB	W8PKM9, A0A0D9RHI5, C3VPJ4, D6R7I9, H0XY65, Q3B7N4, V8NCH7, G3SJL4, M3WSZ7, F7E1C6, U3D9V5, A0A096P2N5, F6ZWR9, K7FZ17, W8PGX1, E2R5S3, D2HPU9, G1SS67, H0W9G6, O95471, I3L3L6, G1R9D6, M3YGD0, F6UJ11, H2NSI1, A0A023SDI0, G1P2Y2, I3LY52, G3W1I6, I3L3X1, A0A023SFD9, H2QC28, F7CZU1, K7EP40, M3WXP4, F5H496, K7EL87, A0A023SCX5	Claudin	InterPro
LOC102128426	-90.74
LOC102115317	-88.64
PRR15L	-85.31	UniProtKB	Q8JZM2	Proline-rich protein 15-like protein	MGI
TLX1	-82.84	UniProtKB	U3K1X9, A0A096P6B4, H2Q2G2, F6VXW7, E1BNZ8, U3JL24, H2NBC8, G1U369, G3WJ06, P31314, M3YZR2, H9GH92, H3ABP3, V8PF47, M3W718, A0A0A9YCS1, F7EGZ4, F7EUI1, A0A0C9RAQ7, F1NNC8, F6WYJ3, W5Q4C2, G3RP14, W5UEX8, G1RXR8, L0BW50, F7FXZ8, G1NCR9, E2RHD0, G3STS5, G3S1Q9, F7FXX6, H0X9G2, A0A0D9QZQ6, F1S8U3, G3QSV6, I3MZ31, H0V0A6, G1MGW2, G3UB59, F6UH27, O93366, G1PNI0, U3IB41, F6ZVF0, F7C6Q7, H0ZID2, G1T4S9	Uncharacterized protein	Ensembl
FOXC1	-76.85	UniProtKB	A3KPE3, B6IDB0, U3IIQ1, U3DHY3, A0A096NKI7, H9FAG0, M3VUW4, F6Q811, G1QAB0, G3ULL9, Q12948, F7CXI5, W6CJ52, G3R1I1, C6KMR8, H3AAM1, F6W0X8, G3U6V6, K7F926, G3WTX5, T2MD99, F7FTZ5, K7B447, M3Z419, A0A0D9SCN3, B5X354, G1LWN1, H0YV72, H2PHQ9, F7GDX2, G3S317	Uncharacterized protein	Ensembl
LOC102140073	-76.43
LOC102119851	-75.25
LOC102138504	-74.85
DNASE2B	-67.54	UniProtKB	A0A096MCH8, G3P585, H2N6X6, U3JU33, G1M4P9, F1PA96, A0A0D9S6W5, G3QY60, G1NAH7, G1PTN2, F7BX32, A0AUY7, M4AU54, H3D3Q1, W5MP03, Q148D7, F6Y5N6, M3WA89, H0Z889, I3LFM5, H0VJE2, G3WZP0, I3MYI2, K7FHC3, F6WHU9, W5ULA1, U3KNW7, Q8WZ79, U3J9T4, H9GAK3, W5PWM6, M3Y2Z3, H2PZA4, W5LDJ0, G3U7I3, H0WSZ3, T2M7V6, H2ZS51, Q66K39, F6X4X0, A0A096MYU6, F1MMW2, G1RFT9	Uncharacterized protein	InterPro
FZD9	-67.42	UniProtKB	G1LXE5, G1SAN4, H0W688, H3BHZ5, Q8TAN2, A0A0D9SDP9, Q9IA02, H2PLY5, I3LRD8, G1U0B7, M3WHD1, U3KIN2, U3IJA6, A0A0C9RMH7, K7F134, W5PTC4, F1MBL4, O00144, G1QGB3, E2RAF3, M3Z7S7, H0XKJ3, A0A096NAS2, G1MQY1, G1TGY1, I3NBQ1, H0YY16, F6X7C5, F6WS18, H9FM69, H9F432, H2R591	Uncharacterized protein	InterPro
GJB1	-67.22	UniProtKB	H0XXY5, H2QYS3, G1Q8Q5, F1RSW9, E2QYR1, D2I1L5, B5KFG1, H2PVZ1, H9GLZ9, G1QKM6, G1NSA4, G7NRV4, F6RCP5, U3KL92, G1TMB8, G3W9X9, K7GLZ7, P08034, Q2NKT9, K7GR60, F6SVW4, G3R5C8, C9JWU8, F6RE67, A0A0D9SAJ6, Q6URH5, O18968, K7EWM0, K7GKW8, H3A596, W5Q5F9, R0K0K1, Q60HF7, M3Z459, I3NEZ3, A0A096NCL7, G3TIU5, Q6WGK6, M3WLD3	Gap junction protein	Ensembl
CSN3	-63.5	UniProtKB	D2SZ86, D2SZ87, D2SZ88, Q9N258, L0BUU8, M3WKE7, G1R800, K0P736, Q71EC2, F6WJ58, K0P739, L0BT11, D2SZ94, Q29137, Q29135, R4I6S1, G3UDT9, D6PZV6, A0SWR1, A0SWR2, A0SWR0, D2SZ93, Q712N6, Q7YRU9, Q7YRV0, K7E526, Q7JFM8, Q7JFM7, K0P7C2, F7IQV8, P33618, Q8SYG2, G0YQK8, Q28794, L0BSU8, A0A059T9V6, E7E1Q3, K9ZUK9, P79094, P79093, Q7YRX5, V5RKE4, K9ZSC8, Q7YRX2, Q7YRX3, Q7YRX4, G3SNT0, Q69DK7, E7E1Q2, E7E…	Kappa-casein	InterPro
KRT14	-63.24	UniProtKB	Q6PVZ1, F1Q0R0, W5Q744, F1S0L1, M3WGY4, F1MC11, G1LFZ4, H2QCZ7, P05785, F1NDP0, G3TJ38, P02533, G1RJ14, H2NVQ7, G1T1Y7, H0X4W1, W5Q6L8, M3YHM3, C8C9Q3, A0A0D9S2F0, V8NSX6, G3VZP3, F7ATL5, G3QRG7, H0V8Q2, G3T7F0, A0A096P5N3, H9NAL6, F6YPS6, A0A024R1X6, G3T6A4, H0YVZ6, U3JC38, G1PTJ6	Keratin 14 (Epidermolysis bullosa simplex, Dowling-Meara, Koebner), isoform CRA_a	InterPro
AQP5	-61.42	UniProtKB	P55064, M3YSV2, H0VZM9, A8W649, G1NDY2, D3TMN2, F1PA30, Q866S3, G1TZK9, A0A096N7Q5, C0KKX1, F7GY55, W5Q9W1, U6DDL8, G5CTG2, W6FSM0, Q683N0, V8PD28, U3JPY6, H0XFY2, U3J783, H3BF11, F7GZY9, H2NH89, H9H5U8, H9KZ39, G3QSX6, A7J2I4, H2Q5W2, F1N5Z0, G3VMA6, I3MGZ3, A0A0D9R153, A0A0D4D5W6	Uncharacterized protein	InterPro
LOC102125649	-61.01
FOXQ1	-57.55	UniProtKB	M3Z5I4, H2R7P4, C1BXE4, Q9C009, F1RXP2, A0A0D9SCN4, G3U7A2, F6Q7H1, U3J2J2, G3WGA0, F7FGN1	Uncharacterized protein	UniProt
ASCL3	-57.29	UniProtKB	H0XAA9, F6URB0, F1MG89, G1S704, G1PQM3, G3X110, G3TNA0, H0ZDB0, F6V2E2, A0A096N8B1, H2Q354, F6V2A1, G1T121, I3M0I8, F1RNK0, W5Q6R4, G1KJE8, F6R0L6, F6PFW1, U3KJN1, A0A0D9SD99, H2NE53, Q9NQ33, M3XB89, U3HZN8, G1N3R4, D2H3I4, H0VIG0, E2RKI6, H3BC20	Uncharacterized protein	Ensembl
CLDN4	-56.13	UniProtKB	E2RNC2, G1MT64, O14493, X5FD72, Q6BBL6, H9GHQ8, G3R823, Q6L707, A0A0D9SDP6, X5FUH5, A0A096MKU9, K0A5W5, F6REW9, H0X2G9, G3TFI6, F6Z8Q3, X5FUI2, U3KH62, F7IE58, H2PLX4, X5F6A1, W5QJA6, W5UKS9, M3Z7S9, H0YYS6, O19005, H2QUQ3, C3VML0, X5FDP0, X5FWF4, I3ND08, V8NM06, G1SAN1, Q75L80, U3J2D0, F6YR27, R4GLR9, F6YY83, X5FDQ0, H0WA21, G1NXC6, M3W2R4, G1SZ42, W5U9G4, K7EWY9, Q30DU7, H3AX44, V8NMF5, V8P1M1,…	Claudin	InterPro
CLDN8	-54.21	UniProtKB	U3DEN6, G3U740, C3VMK5, G1NS63, A0A0D9SBI7, F1SHM7, W5U7A8, F6UMN1, G1KAL7, W5UEE8, F6RQ56, G1QT72, A0A0B5D0K8, P56748, G3S7W7, W5NSC8, G1SW52, H2P2W0, I3LZF9, M3X7Q1, E1BS22, D2HNZ7, H2QKX0, H0XUW9, M3Z670, H0W9D5, E2RS39, R0LQ58, F6VLP4, A4IFM4, A0A096NRN3, K7F1S3, V8PHY8	Claudin	InterPro
CD164L2	-52.28	UniProtKB	Q6UWJ8	CD164 sialomucin-like 2 protein	UniProt
KRT19	-52.14	UniProtKB	G1TAY6, U3IN94, G3VKB3, G3UE29, K7F3T2, F1S0J8, G3RL54, M3VXK3, F1Q0N9, G1LFY5, A7XZY9, H2R114, U3JC49, P51856, G1PRS2, F1NDN9, G1KUF8, H2NU31, A0A0D9S2G2, C9JM50, G1MVR3, V8P8L1, F6ZDD9, P86246, F7BQD8, F6ZXQ2, V8NTI2, U3EQ16, P08727, O93256, P08728, H0XS72, I3MMV6, M3YHN4, K7EMS3, Q5R8S9, G1RIS7	Uncharacterized protein	InterPro
LOC102124879	-51.98
FXYD3	-50.73	UniProtKB	A0A0D9QWZ7, I3LG68, Q14802, H0UZQ2, G3VUD7, K7DYR9, C1BGK3, G1U4B2, A0A0A0MXG6, A0JNK5, F7H5I7, G3S0U8, H2NYE6, G1P700, W5P3M1, G1L015, G3SIJ8, G1RJM4, E2RKS5, H2QG16, F6PGP2, F6XPP9, H0VZL7, W5UMY0, S4R445, H9F278, G3TK23, I3MHA4, C1C4G9, O97797, S4R3M2	Uncharacterized protein	InterPro
KRT18	-50.64	UniProtKB	V8NYU2, E6ZFH0, H2NHF2, P05783, F6TU27, U3JP77, G3SRV0, M3X506, A1XEA5, A6H7D3, A1XEA4, G1Q9N6, Q8SPT9, F1SGG1, K7GIL5, F6S1Q0, K7GIL9, M3VUH3, H9GI59, G1PZS4, G1U758, F7DNA3, E2REU6, F8VZY9, A8D349, G3VTP9, G3VTP8, H3BDJ4, H0XI48, K7BEX9, G1S7N3, A0A024RAY2, I3MQ02, H2Q609, W5Q5M3, I6L965, G3R3T2	Keratin 18, isoform CRA_a	InterPro
FOXA1	-50.23	UniProtKB	H2Q874, G3V4B9, F6UTY3, A0A096NUN4, U3IUK7, A0A096NUN5, W5MST8, F1SHK8, G3S7B5, W5PEC4, M3YXU1, P55317, H3AXE5, M3X2E5, G1LMZ9, H0Y185, G3SL12, G3UEM2, F1MNS7, H2NL26, K7FXK1, U3BW21, F7ALT0, G3VF35, F6YQ64, U3JUH3, U6CXL8, L7P785, G1QAI6, G1K998, H0W853, I3MSK1, A0A0D9RSE6	Uncharacterized protein	Ensembl
EHF	-49.86	UniProtKB	W8B0K4, E9PQX0, M3XKS1, F7F2E6, G3QTJ2, W5U896, U3IV40, F6V4C9, A2D4W8, H0XEB3, A0A096N347, Q9NZC4, E9PPS9, H0ZIF2, V8P1S2, G1S8D8, H0VLS9, A2D686, A2D685, A2D687, W5QBF4, D2HF02, I3NWL8, A0A0A1WI74, F7I587, G1SYY7, A2T737, V5GFX4, A0A0D9QZE4, F6Z8E6, E9PQR6, H3AM60, R4GBC9, M3YJS5, G3T739, G3W8E2, G3W8E1, G1PIU3, C3KHF0, A0A0B2VLA3, A1YG61, F6UZ99, M3VXR9, F6PQA3, F6V4E5, A1YEZ1, G1NCY6, A1YEZ2,…	Uncharacterized protein	Ensembl
LOC101867055	-47.85
PRR4	-47.43	UniProtKB	F7BBZ6, D8SNB4, A0A096N504, Q16378, G3QHE7	Uncharacterized protein	Ensembl
FXYD2	-46.62	UniProtKB	I3MV31, G1Q1C5, F1PVR7, F7CQ22, H0WAC3, G1LAK9, H0XPH7, A6QLN3, G3VPG1, F6X675, F1SAM6, Q04680, H2NFF3, H2NFF4, Q04645, M3XZ71, H2Q4V1, H2Q4V2, F6UI35, P54710, F7CQ15, Q58K79, A0A0D9S3G6, G3SV67, F6WYP0	Uncharacterized protein	InterPro
PAX9	-43.73	UniProtKB	Q2VL44, Q2VL43, Q2VL42, G1NIT1, Q2VL41, G1QSY8, Q2VL40, Q2VL49, Q2VL48, Q2VL47, F7BX59, M3VVV3, Q2VL46, A0A0C9Q600, Q2VL45, G3UQ27, I3MQ90, A0A096NUN0, M3YXU5, A0A096NUN1, G3VT49, A0A034V1G1, G1K9H9, F7C8G7, Q2VL39, Q2VL38, H0X8E8, G3TJ30, F1N8W6, Q2VL37, G1T761, A0A0D9RSG3, W5PDX7, Q2VL62, Q2VL61, Q2VL60, S4U7S5, I7DI22, G1PI69, H2Q872, H0VI35, F1PXE6, I7DF05, K7FVX7, I7CHZ0, U3JUG2, U3JUG3, H0Z…	Paired box protein Pax-9	InterPro
EFCAB4A	-43.49	UniProtKB	W5UMR8	EF-hand calcium-binding domain-containing protein 4A	InterPro
CST9L	-42.17	UniProtKB	A0A0D9RF47, G1RLK6, Q9H4G1, F6ZNQ2, I3LTB4, I0FP90, M3WW42, G1PAH1, G3SR66, H0W0T0, H2P178, H2QK32, H2R933, F6UBN9, G3RGL4, A0A096NVT5, F6RHU9	Uncharacterized protein	InterPro
DEFB1	-41.27	UniProtKB	P60023, P60022, Q95J24, P46159, Q95J22, Q95M68, Q95M67, Q7JGM1, Q95M66, Q95J18, Q7JGM0, G3EIQ9, W5P1P8, H2PPG2, O19038, O97946, G3EIQ2, P61263, P61262, Q7JGM2, P61261, G3EIQ5, G1RY38, H0VCY5, O62697, G1TWT1, A0A0D9RWQ1, Q7JGL9, G1M227, F6PK08, P83943, G1M228, Q7JGL8, O18794, G3EIP7, G3EIP6	Uncharacterized protein	InterPro
EFCAB11	-41.15	UniProtKB	A0A096NE42, F6ZA45, E1C7A9, W5NZL2, G1NK32, A0A0D9RGE2, F7G892, M3Y9V3, R0JDD9, G3QQG1, H2NM04, W5NZL0, G3TFT6, Q9BUY7, U3F2K0, G3VZZ6, J9P3K9, F6Q5F7, F7GMY7, G1PX77, F1SDA8, H0YJX4, E1BIY4, F7H1E6, G1L4A0, G1S556, H3B4A6, G1KQ92, G1T9K3, K7G4Z7, H0W1S6, H2Q8R9	Uncharacterized protein	InterPro
KRT5	-40.75	UniProtKB	H9N7X0, M0QVZ6, F1PRF3, Q6PVZ5, H0X5C3, H2NHD7, H0Z0P5, A5A6M8, G1P830, G1S7Q6, F7HGY2, J9NSI1, H9H8Z6, L7N095, F1SGG6, F6W7V0, P13647, G3SL91, G3RW31, C8C9Q2, V8NBM9, F8W0C6, M3VUG1, Q5XQN5, G1TDN6, H0YI76, F7G4Y0, G3SXI1, G3QK09, A5D7M6, A0A0D9R055, F8VU69, H9Z8R8, H0YIN9, J9PB63, W5Q687, G3WQB9, E2R8Z5, I3MA46, G3QKU2, F6Y5W4, G3T5Z4	Uncharacterized protein	InterPro
LPO	-40.51	UniProtKB	Q45L80, P80025, J3QSD8, Q8R481, W5PGP1, I3MEM8, H0W006, H9KX99, G1P676, F1RRP2, A0A0D9R021, F5H386, K7GPU2, G1LZG5, G3WEN8, F7CCN5, A3F9D6, A0A096P4T1, F7BAC5, A5JUY8, M3WGL8, F7C3Z3, F7BAB9, G3UBF9, H2NTI4, G3MXZ0, E2RFI9, G1R9M9, J3KT11, P22079, H2QDI8, G1SXQ6, H0WL87, H0YYF6, H0Y3I2, F6YN88, M3YV73, F6WKY2	Uncharacterized protein	Ensembl
LOC102136578	-40.41
LOC101866067	-39.51
CLDN3	-39.03	UniProtKB	G3ULL6, G1SAN2, C3VPJ6, C3VPJ5, G1N4Y0, Q765P0, Q95KM5, F6RQF6, A0A096ML45, F7FSX7, K7EYP7, A0A0D9SDP7, U3J2B1, O15551, U3J2B2, V8NKA1, Q765N9, H0VCR9, Q75L79, I3N0S6, H9GHR7, I3LP60, Q30DU8, H2PLX5, H0XHP2, M3Z7S8, F7BNR9, U3KIP2, A0A0E3DB38, G3S2W1, W5PMF3, A0A023SFL5, D2HMA0, H2R590	Claudin	InterPro
RASD1	-38.59	UniProtKB	U3KH73, Q9Y272, H0WIB2, G3T9S9, H2ZZD3, B5X6D7, G1MZ23, G3X0F2, M3XLS1, C1BKT5, H9G949, F7H994, F1SB13, G1T8F0, A0A096P319, K7FD89, U3IMA3, G1L6A1, H2NSW6, F1MLL3, G7NJ16, V8NNQ5, F6X0F2, F7G958, H2QCD4, F7C5N9, B5XC92, M3W4J3, B5XCF8, Q3SZ02, I3N4G1, H0VTI5, Q19NX1, W5NUI7, G3R6K7, E2RE35, G1RT57, U6DER4, A0A0D9R7V6, H0ZAH5, G1QDQ9, C1BM67, B5X894	Uncharacterized protein	UniProt
LOC102130077	-38.22
HSD11B2	-36.87	UniProtKB	G1MSN2, U3IJ20, F7AU45, G1Q4T4, H9G7V3, F7EYS9, U3JXT0, I3MRJ8, H0Y1Q7, F1N3U0, Q8MKG1, O77667, G1MG86, Q3ZCE5, F1P9F1, G3RB12, G3T2U0, A0A096N5G4, H0Z640, H3A8L2, P51976, P80365, F6WWR0, G1QXB9, V8NJN1, H2NR78, K7FSN1, M3X244, P50168, A5HL65, F7HKM0, A0A0D9QV74, M3Y4I8, F1NV84, G1T233, F7H597, H2QBB5	Uncharacterized protein	Ensembl
SIX4	-36.59	UniProtKB	U3KMH7, I3N3Q8, U3JLD3, G3N1K8, G3V2N2, A0A034WV63, G1RTX8, G3WTY1, M3WSX2, H3BGR7, A0A0D9RNW7, J9NXQ2, F6XRS2, G3R3F2, G3TMW0, F7GRZ1, K7A7J5, G1NXM0, J9P424, A0A096NVG7, M3Y4W6, D2GVS5, G3UV12, K7EFP9, K7G7Q1, H0VQX4, G1L899, K7CE73, T2M3Z6, H9GBN0, F6PGG3, F1NHV5, U6DHT1, H0XEL6, U3IKH2, H2NLF4, F7I6A7, H2R2J7, H0ZRY6, W5QJ08, F1SRW3, A0A0C9QC42, F6UJE4, G1NLF1, Q9UIU6	Homeobox protein SIX4	InterPro
SOX10	-36.54	UniProtKB	F7DQK8, A0A096NK02, A5A763, H0VWT9, G1T2J3, G3U829, G1LUY0, F1SKN9, G1NIR5, M3VZ63, F1PHT3, H9GM37, H3A5R9, P56693, H0ZJN2, Q9W757, A0A024R1N6, I3MYB5, F6XMN9, K7G5M4, G1PPS4, H2P4C4, H2R180, U3JIS6, H9H793, F1N6W0, H0W9P1, G3W2Q6, U3J6F2, F6WZU9, H0XRV1, R9PXP0, M3YNM2, G3RTX9	SRY (Sex determining region Y)-box 10, isoform CRA_a	Ensembl
ST6GALNAC2	-35.73	UniProtKB	G3TPJ6, G3R968, U3KPE4, F1RWP7, A0A096M6L5, M3YPS5, H3B489, F6W386, W5PA89, G1SXG3, J9NYC3, F6WBM6, K7EMM1, U3IZP8, G1QQ18, A0A0D9QYH2, H0WZB9, Q9UJ37, F6XGJ9, H0ZBU9, F6SFY9, F1PDM4, A0A024R8M1, Q92184, H2RAN0, F1NF50, G3WSN6, Q0VC72, B2ZCZ7, U3JDV8, I3MXD6, H0VUT5, J9NY94, F7H4E4, W5MZT1, K7F4B2, I3JSA5, M3WGA4, G1KHS4, Q148L9, K7BHH8, G1LV23, A0A096NT43, F6YXD5, H2NUU1, G1MYB0	ST6 (Alpha-N-acetyl-neuraminyl-2,3-beta-galactosyl-1, 3)-N-acetylgalactosaminide alpha-2,6-sialyltransferase 2, isoform CRA_b	UniProt
KIAA1522	-35.63	UniProtKB	A2A7S8	Uncharacterized protein KIAA1522	MGI
VSIG10L	-34.53	UniProtKB	Q86VR7, W5PZB6	V-set and immunoglobulin domain-containing protein 10-like	UniProt
CCL28	-34.14	UniProtKB	Q1WKS0, A9YTX4, H2PFH3, A6YT15, B5XFJ6, A0A096MMS9, F1SMG9, F6VWX6, G1RHI1, G3UCR9, A6N8N9, I3M6J4, G9M4M3, A0A0D9RW31, V8PI30, Q9NRJ3, F7IL60, B5X5G3, Q68A91, G3W9T0, H0W7M3, B5XB81, U6CPT1, F7HJN0, H2R0Y1, D6RC73, F7CEQ7, A0N0Q3, C1C1F5, F7IL58, A0A096MN37, G1PFR3, Q4VWI1, D2HHR1, G3SK81, H0WZW1, B5XBF9, G3RAN7, U3BAU8, B5X6U9	C-C motif chemokine	UniProt
LOC101926752	-33.92
SHISA2	-33.58	UniProtKB	Q6UWI4, A6QPA0	Protein shisa-2 homolog	UniProt
FOLR1	-33.04	UniProtKB	G3QS30, I3MG93, A0A096MMB1, G1PPC4, A0A024R5H1, P15328, H2Q4C4, H9FH81, H0VLN7, M3YFP6, H9EZ07, P02702, G3SXL0, F7BP60, G1SCR2, M3WR11, F6V730, H0WGV9	Folate receptor 1 (Adult), isoform CRA_a	Ensembl
TMEM213	-32.69	UniProtKB	A2RRL7, Q58CU5	Transmembrane protein 213	UniProt
IRX2	-32.67	UniProtKB	G1RK74, I3M2G0, H0UUW3, F6VTG9, G3RI39, H9G433, U3JRQ9, Q9BZI1, U3INP3, K7GF31, F7ERU9, E2RNP5, F7E8H2, G3VFC7, H0X7Z9, A0A096MNY6, F7EL23, G3N2B2, A0A0D9RXP8, H2PF48, M3Y8D5, F7ERU3, F6TTL3, G3UHZ8, T2M5F4, G1SWP2, F6R2X3, G1M419, H2QQL5, G1NXP2, H0ZDV2	Uncharacterized protein	Ensembl
LOC102121606	-31.62
CRYAB	-31.35	UniProtKB	U3JUI9, U6DLP6, G1T4F9, O12987, H0YCW8, H0YPX8, A0A024R3B9, F6ZRK0, I3MEU1, Q60HG8, F6SYI2, G1R6R0, E9PR44, O12991, E9PS12, O12995, F7H3G0, W5Q0R4, H9GBH5, M3WT79, D2HG87, E9PRS4, V6F832, C3VMY8, Q5R9K0, G3WJX1, Q9EPF3, E9PNH7, H2Q4R8, W8P2H8, E9PJL7, V8P1R1, A0A0D9S2T4, Q5ENY9, M3XWX5, Q91312, Q91518, H3BHK1, P02510, P02511, H0X7G5, P02512, G1MZP6, P41316, G3QR27, B1Q039, Q7M2W6, F7ATA8, E2RNB6,…	Crystallin, alpha B, isoform CRA_c	InterPro
MFSD6L	-30.98	UniProtKB	G1S9H5, Q8IWD5, H0XM40, M3Z7N3, F6XVJ1, I3N736, G3SYF9, E2RLF9, D2HGE5, F1SS91	Uncharacterized protein	InterPro
LOC102140511	-30.95
EPS8L2	-30.83	UniProtKB	F6TZK1, K7ETI8, U3CAB1, G1LW39, I3MLT7, G5E5T1, W5P822, F6VIA6, Q9H6S3, G1KQU8, G1RAZ6, H0V1Q3, H0ZA30, G3UL43, F7BFV0, V8NQX9, M3X3U8, G3SIL2, F1RYY5, U3K8L2, F6ZIM2, Q5RC07, E2R1E6, U3ITK2, A0A0A1XAD1, H0XD70, U3BSU0, A0A096N4R5, G1MXJ6, K7GGF5	Uncharacterized protein	Ensembl
GNMT	-30.74	UniProtKB	T2MDP8, F7I607, G1M277, A0A0D9RGG9, G1QXC6, G3RCK3, H9F474, H0VDB3, F6RBA4, U3JDA4, G3TC50, C3KK27, A0A034WJU9, U6DL46, Q29555, A0A096NI74, V5GSM2, W8CBB1, H0Z464, A0A034WMD1, H2PJ33, F7CZP8, H2QT12, F1N1S9, A5GFQ6, G3WDR0, G1SKJ7, W5P2H9, I3MDL6, E2RDH0, U3J5U9, G1N5I2, F7C5H5, Q29513, G1PJT4, H0X7H4, K7F321, M3YP68, C1BRJ1, M3WBY3, K7F320, C1BZI0, C1BT05, G1KEE2, Q14749	Glycine N-methyltransferase	UniProt
LOC102117215	-30.45
CFTR	-28.79	UniProtKB	Q07E42, A0A089PPW6, Q6KEJ1, Q6KEB8, Q2IBE4, Q99989, Q5I6F9, Q6KEJ4, C3KGW9, A0A024R730, Q6KEJ7, P70034, V5GIU4, Q09YJ4, G3U009, P79262, A4D7Q9, I3M6L1, A4D7Q5, A4D7Q6, H0Z3F5, A0A0A7MBI3, Q6KEB2, A0A096ZUB8, F6ZS67, A0A096ZUB9, Q2QLF9, D2JYJ5, A0A096N2J6, Q6KEC8, G1KHB2, A0A096ZUB7, H9FJ72, H0Y8A9, Q9UML8, A0A096ZUB3, Q9NP07, Q9UML7, Q9NP06, Q6PQZ2, H0WJA0, A4D7R2, Q07DZ6, Q9GLE1, G3SWU6, Q9TT76,…	Cystic fibrosis transmembrane conductance regulator	UniProt
RHOV	-27.98	UniProtKB	R4GKN9, Q05D03, A0A0D9R5H5, H9G7I5, F7IT08, G3TQ86, Q96L33, W5QGE9, A0A024R9R2, F1N282, G1QT11, G3VG44, H2R8G9, G1NF58, F6YT10, F6TF29, H3A713, F7IT10, I3NHF1, F7EP95, U3J933, F1SST5, H0Y0J1, G1SMQ6, F7CZM0, H0ZKI3, M3X1D9, G3RMK3, M3YBI6, U3JUF0, H0VJ17, U6DNN7, C7BDX4, J9P3I9, G1MEN4, A0A096NTJ1, G3S7N0, H2NMV9, K7G6L7	Ras homolog gene family, member V, isoform CRA_a	UniProt
ESRP2	-27.75	UniProtKB	H2QBD8, F7C2P3, G3TDJ1, J3QQJ9, F7EI92, F1MSN9, H0X6P0, H3BDM2, G3VA65, G3VA64, K7F6G2, G1LN68, H2NRA6, A0A0A1TE42, G1MXW8, U3IAB4, G3R3S9, Q5ZLR4, M3XHK9, F7DNJ6, G3U463, F1PA85, H9GFU2, W5NZI6, G3US20, Q9H6T0, H0Z9E9, G1SF15, W5NZI7, A0A0D9QVN5, A0A0A1TTP8, U3JZ81, M3WD85, G1P5W8, A0A096MVY6, G3SGR8, U6DML0, F6QMA8, F6TGB2, M3Y6G1, I3MLH3, G1QZ79, H0V0P5	Uncharacterized protein	InterPro
NXPE4	-27.64	UniProtKB	F1P6Z1, F7CQC5, F6W8I8, G3VPL7, F1N184, G1R6W6, F6REV5, W5NSS3, Q6UWF7, H2NFD2, H0X929, G1M3P5, G3R0G2, A0A096MWX3, G3SV59, H2R4Y5, G1SZ13	Uncharacterized protein	Ensembl
PKP3	-25.6	UniProtKB	H0VL58, M3W7Z1, F7DXN2, E9PQ15, G3UC64, G3UIX3, G1LV15, K7EGB1, F6T0C3, U3J409, E9PKC4, G1R9W3, I3MJA3, K7FJV7, F7CA43, C0H974, H0Z8S8, A0A0D9RFA5, I3LEV4, U3B2T7, U6DP50, Q9Y446, W5PDF4, G3VZN4, G1KNU2, G3VZN5, G1MUI5, F7HQV1, G3VZN3, M3YB26, H0X5W8, E9PK71, G3QW31, Q08DQ0, H2NC95, Q93Z53, K7FJW8, I3LFN8, E9PJR7, A0A096MQ96, H0YEY5, F1PY11, G1LV22, U3KAJ3, E9PRW6	Uncharacterized protein	Ensembl
TFCP2L1	-25.53	UniProtKB	E1C1L2, G1KCS8, G1NZ34, G3WLK8, H0VJD5, G3UG22, I3MKC2, G1SRW6, H0Z2D3, H2P7B8, K7FMQ4, F7CQ65, F1PCX4, H0X612, G1NH66, F1RXX5, F7EWV8, F6SYN6, K7GPQ6, U3J7P8, E1BPT7, Q9NZI6, F6PZL7, F7G0J7, U3KFK3, M3WGE3, G1LFD7, Q5RB16, M3XPM8, G3RZF0, W5PUC9, A0A096MZ20, H2QIN0	Uncharacterized protein	Ensembl
TSPAN6	-24.79	UniProtKB	H0YVQ8, O43657, K7GPG7, U3IMF4, K7GKD8, F1PMP0, K7GKV0, Q5RAS5, F7G2V8, F6UL12, G3TT38, H0V4P6, H0WQU0, K7GQH7, K7GSC1, F6T0D6, M3W038, A0A096N762, F6T835, G3VAV6, G1T0T1, G1MYM6, K7GME2, G1R7G0, K7F5Z9, K7GKW2, A0A087WYV6, H2RFW3, K7GQV4, U3JMR8, W5NW65, G1PB14, G1L609, I3MUR0, M3XTD0, Q32KU6, A0A024RCI0, E1C857, A0A087WZU5, U3DD44, F7GWP1, A0A0D9RDC9, H2QYV9, G3R3D7, I3LT73, H3B6A7, H9EV87, K7G…	Tetraspanin 6, isoform CRA_a	UniProt
ERBB3	-24.71	UniProtKB	F6XN87, G1S724, H9H274, G3TDW2, H2NHN2, I3NGW2, H2ZVQ6, Q5RB22, I3L6Z7, F6YWY0, H0WIR3, F6YAR5, H9H5Z1, H1A1J4, B3KWG5, A6QR62, U3FA11, G1L9H7, F8VW56, F7HL92, W5PL95, A0A0D9QYY2, H9GA09, G1TDH0, M3WLH4, F1SPI8, M3XPI4, F1PVC5, K7BG96, F6RXS0, B4DGQ7, G7N7B1, G1NU59, A0A096N4L9, A0A0D3QSG2, F8VYK4, G3VU99, H0VS00, P21860, F7HEH3, A0A024RB84	Receptor protein-tyrosine kinase	UniProt
FAM84A	-24.43	UniProtKB	Q9D650	Protein FAM84A	MGI
DMRTA1	-24.27	UniProtKB	F2Y922, F6SI73, G1KU29, F1SNK8, F2VRG0, F2VRG1, F7B5M6, F2VRG2, F2VRG3, F2VRG4, F7I217, T2MBS0, F7I218, G3U4M0, F2Y520, F2Y521, F1P9K2, F2Y522, A1YF87, F2Y523, F2Y524, G3R135, F2Y525, F2Y526, F2Y527, F2Y528, F2Y529, G1LLX1, F2VRF8, F2VRF9, K7EWM2, F6SI64, G1KXF8, A2T7Z5, A0A087YGV2, W5PYF8, H0WBM5, G1PMI0, G1SQ91, H3CC14, A0A096P1F3, Q5VZB9, A1YFR3, A1YFR4, G1S302, A2T6C4, A2T7C7, F7HST0, G3TC51,…	Uncharacterized protein	InterPro
SLITRK6	-24.03	UniProtKB	H0ZQT0, A0A096NCU7, F1NZH1, U3KJU5, W5Q6T2, F1MSM8, G3U761, G3SHZ6, H2NK43, H2RCK8, F7GT29, F7HVP0, G1KCS9, F6R8M5, Q9H5Y7, G1S398, F1RP63, K7FKP7, G1P9G5, F7BJP9, G1NPX9, M3Z4Z4, U3IVF4, D2HWK5, H0XJ12, I3NGH8, E2RFX7	Uncharacterized protein	Ensembl
FAM46B	-23.26	UniProtKB	Q96A09	Protein FAM46B	IntAct
PLD6	-23.04	UniProtKB	H9KWG3, G1MYU2, G1RSR5, U3I8M9, G3RV35, M3ZAS1, A0A0D9R806, T2MA50, E2RD63, A0A096P313, W5NVF3, G1L642, G3WZ49, M3W4I9, F6XBG6, G1TMC1, M3XLR5, I2CWM1, H0XM16, E1BE10, H0VLF0, U3KH83, Q8N2A8, G3U4F8, F6TQM8, G2HE65, I3M3Y4	Uncharacterized protein	InterPro
RASSF10	-22.62	UniProtKB	H9G9A3, G1TP93, H3B3E3, A6NK89, G3WWC0, M3XFA8, M3YNW7, A0A0D9SD97, G1PD29, F7F1N5, F7HB12, H0WA66, W5PDT6, H2NE26, E1BF74, F6PGV1, K7F165, G1L696, I3MYI4, I3LGK4, F7CVQ0, G3SJ21, F6XVP0, H0Y048, E2QWW2	Uncharacterized protein	InterPro
LRRC26	-22.07	UniProtKB	H2QY81, U3JRS1, G1MS54, G1RCY0, H0VFB9, H9G5D8, E1BY98, M3YUI2, A0A096NWP2, H0XY40, H2PU28, F7GX81, R0LH04, Q2I0M4, F7ABB5, F7G3P6, G1MDF1, G3QQG0, F7EN84, F6XYF9, G3N2S4, I3NG62, G3W747, F1PY45	Uncharacterized protein	Ensembl
CRISP3	-21.83	UniProtKB	I3L0A1, U3BZ13, G1QVC7, F7BWJ9, G3PI00, H2QT57, G1QVD4, A0A096NJ02, O19010, I3LVL5, G3PI03, F6R3I5, G1NX52, H2MPL2, H2MPL1, H2PJB2, M4AW47, K7GKZ6, G3R5P9, H2MPL3, F7FY55, M3W8B6, J3KPA1, P54108, F6SW97, A0A0D9RK97, Q3ZCL0	Uncharacterized protein	InterPro
LOC102129465	-21.77
SLC31A2	-21.52	UniProtKB	F6V056, F1Q0H2, G1S3N5, G1TKM2, H2PT37, F6R591, H0YXY8, U3CLW0, H2QXQ0, F7FVX6, I3LWW5, G1PRY1, H0V398, G3WZY3, Q3T0K0, U3E306, M3XCT7, H9EW94, F7AM74, F1SN90, Q53X94, O15432, G1MVG9, H0WX22, W5UHP7, J9P0A4, A0A0D9RIX7, M3Y8W6, A0A096P0U5, U3I200, G3T1S6, G1M3C6, U3JSG7, A0A0B2VAZ3, F7HLP5, G3RCI1, W5P8U1	Uncharacterized protein	InterPro
ELF5	-21.43	UniProtKB	A2D5G1, G1LN20, U3IU95, F6ZRG3, A0A096N0J1, A0A089FZ13, G1T6X3, U3KIY9, F6W442, H0VLS6, X2CU32, J9P632, G1S8D7, B0JYP9, F7EKJ9, K7FNZ4, G3RZK4, Q6QTF1, F6PLC7, F6ZRF5, M3YJR8, F6PLD5, A0A087X1W9, M3XBW9, H0XJJ2, A2T7Z8, A0A096N9C2, A0A0D9QZE1, A1YF97, F1PRJ3, F1NNH4, G1NCX6, A2T7C9, Q58DT0, F6RT97, U6DPH8, A0A0D3BFP5, H9GJL3, Q9UKW6, G3QVG3, G3SWZ0, A1YGI4, H3AJ88, I3MBX9, A2D5U9, F7CJI2, A2D6C8,…	ETS-related transcription factor Elf-5	GO_Central
SOX9	-21.34	UniProtKB	F6XLD1, F7E3K1, F7DR52, U5XK50, I3N9S6, K7GF94, M3WN27, Q9BG89, C0HAA6, S6CBB2, G1N4C7, A4L1W3, A0A0D9QWJ2, A0A8J7, Q7YRJ7, U5XN67, M3YS85, Q71VI1, A3F5A1, A3F5A0, G3N274, H0YXE0, Q9BG91, E6ZGK6, Q4SGN2, D0VEC6, U5XMM4, A1XSZ8, G1T1P0, U3J0D5, G3SNK4, U5XJZ4, Q9YGP7, H3C5T1, U5XJZ1, G3QHA4, F7DR16, U3CPN1, Q8UWL6, F1PSM5, U5XJY7, G1QQH5, C0PUR2, H0Y233, W5PWD8, U4MKU1, F6PPG2, H2QDR6, G1QC03, H2N…	Uncharacterized protein	Ensembl
ZNF750	-21.07	UniProtKB	M3WJY2, G1KU26, G1PJA5, G3W353, W5Q3U2, H0ZB92, I3N5N8, Q32MQ0, U3JDC2, F6TS33, F1RZZ2, H2NV73, H0XAQ8, U3IVX9, F7B7P8, G3T4K6, G3QHX3, H2QE61, F7GUM8, I3L0W7, A0A096NTQ9, A2VDR9, G1RIH5, D2HUY8, F6ZMN3, H0VER9, K7FQC5, G1MX13, E1BRY6, H9GWC9, M3YHI8, F6PLB7, G1SH89	Uncharacterized protein	Ensembl
PITX1	-20.05	UniProtKB	A0A0D9RLR9, H0VVH5, K7F916, M3XA39, H0YSN0, H0YJC8, H0XMQ3, U3JZV3, F7HTS7, H2PGL2, A0A096MKR9, G1PL00, V8P2E1, I3N4C7, D6R955, P78337, F7C3E3, K7EBW3, W5PZ46, F7CYN3, H9GAP2, H3A2I0, G1MHQ8, P56673, G3UEK4, G3QQ87, E2RRG5, H9G504, G1R9X7, X5D9A5, F1MU46, D6R9U1, F8SIP6, V8NGS5, F6U4T1, T2MEU5, M3YF37, H2QRI7, G3WK78, F1P452	Uncharacterized protein	Ensembl
TSTD1	-19.99	UniProtKB	H2RBV6, U3K4R7, U6CP20, T2M8L8, H0VUA9, G3WU84, H2N530, I3NB25, U3IFV1, H2RCS2, K7FNG4, F7GE64, U3DWC0, G1RUI3, G1PYL7, U3F6F6, G1KK05, H0XMJ9, F7BCX2, G3QMV7, M3XBU3, H0ZPW3, F7D448, M3XRC2, E2RCN0, Q8NFU3, G1MAV9, F7CGZ6, A0A096NP90, H9ERI2, G1NLD7, F1S179, F6V1M5, G1TTI3, F1MW03	Uncharacterized protein	Ensembl
TMEM30B	-19.79	UniProtKB	Q3MIR4, A0A087XWA3, W5NS53, G1T2W5, M3Z7E9, G3P5I0, W6FIJ8, H9GGF4, G1RU54, I3LWB3, H0XWU8, W5MAJ2, W5LMD4, H9H373, M3XDW1, G3RWI5, G3SIX4, M4A110, F6PUD8, A0A0B2UYF2, F1P8N9, F7GBN1, G3W3B5, G3W3B4, G3U1X9, G3P5J4, G1L8F4, A0A096MQW7, G3P5H4, H3DIP8, W5MAK7, A0A0D9SDI3, F6ZFS9, H0W3D1, F1SRU8, F1MPT8, H2NLF8	Uncharacterized protein	InterPro
PHLDA1	-19.7	UniProtKB	I3NHE1, H0V0F1, A7YWG9, F6U7S7, G3QNV7, G3T119, G1QXJ0, G3VAR2, Q8WV24, G1LIP3, H0Y0I2, U3KK06, U3I2J5, F1SGD8, F7A3C6, R4GND3, H9FKB5, F7I4Z1, W5Q5E5, H2Q6I2, G1TX19, A0A096NEM7, M3XA40	Uncharacterized protein	Ensembl
SLC6A14	-19.65	UniProtKB	A7Y471, U3JGH5, V8PDF6, C8CBZ0, H0WHW2, Q27ZN7, G1RXD1, E2RIT2, G1T8K9, F6W9U0, E1C8K0, A0A096MXM4, V9I0N8, G1P5P0, A5D7H9, H2QZ13, G3U2Z5, A0A0B2V791, I3LKJ8, M3XF00, F6RY60, G1MUM6, H2PWK2, K7GPM4, K7GNX7, K7GR07, A0A0A1XKM1, G3TC61, Q9UN76, U3IS32, K7GKM5, H9G9L7, W5Q695, M3XRP7, J9PB96, F7HQF7, A0A0D9S099, G3R5I3, H0YY32, K7G0K3, F6WG98, I3M973, G1L4M5	Transporter	InterPro
LCN2	-19.62	UniProtKB	P80188, H9H4W6, H2PTI2, H0XHI3, U3FJX0, G3RG89, A0A096P1Y5, H9H4D4, F1RRX1, F6X9J5, W5PMH6, F6XAF3, A0A0D9RNH8, G3TQ27, F6TIR2, F6WPB0, G1M9R7, H2R697, E1B6Z6, E2RSM4, G3SEI1, I0FM65, X6R8F3	Uncharacterized protein	InterPro
LOC102141052	-19.4
LOC101867238	-19.24
TSPAN1	-19.14	UniProtKB	F1NBL2, W5MEX5, U3IJ40, G3VGR8, K7FYA8, G1SNF8, I3MV16, H3C1Q2, H0ZCW3, G1P0V3, R4G9D3, H2PYY2, F7GF39, O60635, F6ZI08, F1S3V5, F7G2H5, H0XIC6, Q3T0S3, G1NDT9, F6UGN7, G3SSW3, Q4R7W6, K7EH18, U3BAJ0, A0A087X7F6, A0A0D9S7E9, W5NVX6, W5KVA8, Q5RC27, G3S2H2, U3K4G4, M3ZTT7, H3B0Q0, H0V4W9, G1M5E5, M3YNG6, E2RPE6, A0A096N1N8, G3NNH7, J9NS67, G1S3V1, M3VUZ7	Tetraspanin	UniProt
FAM84B	-18.72	UniProtKB	G1KK07, F1RRR7, H0XS53, U3I2I9, W5PE80, E1BTF9, H0W3N6, M3XQG5, H2QWQ1, F7CZR2, F1PW16, A7Z045, G1R0L1, I3N0C8, K7FMA1, G3W541, U3KJ06, G3R1Q0, H2PR69, G1NRT4, G3SZX8, H0ZQI7, F7FXT5, G1SJU4, Q96KN1, A0A096NWQ6, F7I463	Uncharacterized protein	Ensembl
IRX5	-18.55	UniProtKB	V8NFW6, F7HMJ3, J9NZ44, F6UIE6, P78411, H0VKF5, G3S1Z7, W5PN23, K7FHS0, I3MUJ5, H3B7V3, Q4S1Q2, E2RP58, M3WQ68, G1SJB3, G3SL34, G1Q1N2, F7DM19, H2NQX0, G3SFH9, H2QB39, M3XW91, V8N262, H0WP91, E1B855, G3VWM5, A0A096NIE7, F7EWI7, G1QKF5, A0A0D9QZ13, G3UK62, K7FHR3, I3L8M8	Uncharacterized protein	Ensembl
RAB17	-18.26	UniProtKB	A0A024R4A4, H2P920, G3W5U0, Q9H0T7, F1PNL2, I0FHV6, C9J0T6, I3KJ39, I3KJ38, W5MC56, G1NTB4, G3RGH1, H3DKF7, H7C1P7, M3WHG6, F8WAG1, K7EUV2, K7GFY0, U3KE91, F6RIA9, U3IB01, C1BYX7, H0Z014, F1N7V2, H0X859, H0VSM6, G3TIY2, I2CUY0, G1KCY4, G1MVU3, E1C6J7, H2T952, W5QCH7, S4R8L4, G1LPC9, A0A0D9R1B9, F6U0I6, F7GCR3, F7HB42, G1RJQ5, B8ZZM5, H2QJP4, U6DVT6, M3XLX5, M3ZCA1, F8WBE9, Q6FIH2, A0A096NYJ2, I3M…	RAB17, member RAS oncogene family, isoform CRA_a	UniProt
RAB26	-18.22	UniProtKB	W8BXU4, F7E9F2, H0VZU4, E6ZGJ8, H0Y119, I3MKC0, A0A0B2UUC8, M3WNH3, M3YVE2, F7FRV0, U3JLS3, A0A034WG92, W5LI73, K7FDW5, A0A0B2VJF0, G3WVF7, H2NPT3, U3IHW0, A0A096NL13, G3TQA8, W8BMD0, H9FSK4, H0Z7I4, M5FMU1, H3BMG6, G1N2Y8, G1RD58, F6PKA7, H9G3U0, Q9ULW5, G1U0A5, H2QAC4, A0A0D9RF26, E1C0Q9, W5Q8C0, F1RFB0, G3SD74, F6TI68, G1MHG8, M4AS57, K7FDX0, G1PBR2, F7HET0, G3S1M0, W5M114, Q29RR0, H3BQ97, E2R…	Ras-related protein Rab-26	UniProt
C1H1orf116	-18.1
LOC101864989	-18.06
BARX2	-18.04	UniProtKB	F1PUX5, H2NFV4, G1TLN0, H9GMZ5, U3I880, M3VZB6, G1MQP7, F1S6F3, Q9UMQ3, F7BAQ7, U3CYR1, D2GUX7, A0A096NDG7, U6DJM2, J9P0C1, G3VXN4, W5PVP0, F7ALP0, F7FBH5, G1R7D5, H0X196, G1NST4, G5E5Q0, Q9N0M2, A0A0D9S4N5, H0YQM6, F7CBI3, G3RH91, M3YBA9, H3BEN8, F6T8B5, G3SX45, U3JQP9, K7F6T6, I3MW30, H2Q542, H0VIU1, A6QLV7	Uncharacterized protein	Ensembl
C15H9orf152	-17.46
LOC102118051	-17.39
KIAA1324	-17.26	UniProtKB	W5QCP8, G1PB71, F1S5Z2, G3TIA3, R4GL38, F1MIM6, H9H1X2, Q6UXG2, I3MGS9, H0YT68, K7G0G4, G3RKA6, G1LD17, H0X984, F7GEC2, G3WZM7, M3XUL8, H2N6J1, M3WM91, U3JI72, G1SVH9, G1KJW6, F1PMT3, G1QPQ5, F7I0Y7, U3IM38, H2PZJ9, H0VTZ7, F6TRZ6	Uncharacterized protein	Ensembl
PLIN5	-16.95	UniProtKB	F7GWF3, I3NA39, H0YRA1, U3J3Z8, U3JEM8, Q00G26, G1L579, W5PHU5, M3WPA9, A6QLL0, A0A0A0MX13, H2NX32, H2RCN8, G1N391, G3VL52, F7G6H1, H0XKN5, F6ZFH1, G1Q8A5, K7FET6, F7HCW0, M3Y160, F1PX42, G3X8I9	Perilipin	Ensembl
DSP	-16.84	UniProtKB	F6WDG6, H3CKC9, A0A096NKT5, H0YVV0, A0A096NKT3, C7TZS9, M3WCK3, G3TRF5, C1LIU8, G3TU65, U3D054, G3UTZ5, E1BWI0, I3MNA1, I0FGG7, P15924, H2QS97, J9P8T8, H2PHV5, H3A7P6, I2CWK6, U3BLC2, F6ZV64, F7DBN3, A0A0D9R4Y1, W5Q7Z7, E2RNG4, G1MXH6, M3XNC1, G3WNZ6, W5URJ4, G1MG59, H9G6P9, F6Y796, A0A0E3DBW1, C1L641, G1T4V7, G1UI31, F7G1T7, H9YUU2, H0VB43, H0WRQ1, G3RBN0, K7CQE3, F7DT28, E1BKT9, K7CV89, G1PCP0,…	Uncharacterized protein	Ensembl
MUC15	-16.78	UniProtKB	Q8MI01, Q8N387	Mucin-15	UniProt
TRPV6	-16.75	UniProtKB	Q7T2Z4, F7IJM7, Q9H1D0, F6UPE4, M3WLM3, A7Y2X7, F7IJK0, M3YAP3, F7IIA8, V5NAT2, H0UU06, A0A0B2V2R1, H9F3T3, A0A0G2JMR5, G3VQP1, F1PHF9, A0A087WV12, F7DSL2, H2R1M4, G1LIQ3, B6V8E1, U3BS76, Q4U456, C9JHY1, V8P2P1, B3VQM4, H2PNU5, E1BAN3, G3TKX7, F7G979, F7IJL2, G1STA8, I3MAU4, H0X9B3, C6L2A6, F6ZFD1, A0A0D9R4Y5, F1SRU0, U6E086, G3RHV5, A0A096MSP9, F7IRL5, W5Q626, A0A0B2VE94, F1NAX8, G1QR79	Transient receptor potential cation channel subfamily V member 6	InterPro
FAM110C	-16.74	UniProtKB	F1PRA6, U3JH14, H2QHC7, H2P734, H0VK55, K7F019, F6ZA62, G3ULF8, H0XX30, G3RL73, H0ZRT5, G1RA72, G1LSH0, M3Z6Y4, Q1W6H9, I3N2Y0, G1SD20, U3I1D5, G1KDY2, M3XCH4, G3VEK5, F6RA72, F7F818, F6Y1F9	Uncharacterized protein	Ensembl
LOC101865419	-16.7
LOC101866484	-16.7
SFN	-16.7	UniProtKB	F1PQ93, G1SAD1, G7MHX1, P31947, U3ITD7, H0VGT6, F7I733, F6RM85, H1A595, O77642, F7FY05, R4GF89, H9GNH2, K7EWQ2, G1LW81, A0A096N870, G3R777, H2RC87, F7CIM1, G1SQX9, Q0VC36, G1PFE8, G3U9J4, F1STR9, A0A0D9S918, H2N8E8, M3Z534, I3MPC7, G1NRI5, M3WHN9, U3KIK8, H0Y1J1, W5QAA1, F7BU66	Uncharacterized protein	Ensembl
LOC101866891	-16.64
LOC102129296	-16.25
KLC3	-16.11	UniProtKB	H0VTQ8, Q5R8E2, G1QN58, F6ZCP0, H2QGL3, G3RIE0, M3Y3Q3, F1MM11, E2RN88, A0A0D9S1W3, G3SE63, M3VYY2, F6TC28, H0XWU4, K7EL76, A0A0A0MUW5, F7HX12, G1M1J0, H2NZ80, G1Q6L1, W5PJ82, G1PK76, A0A024R0V3, I3N340, Q6P597, K7ENJ3, Q2TBQ9, H3B340, G3VFE4	Kinesin light chain 3, isoform CRA_a	InterPro
CDR1	-15.83	UniProtKB	B9WEB1, Q5ANA3, F2QRI3, B9WE03, W6QE78, A3LZU3, W0SD47, P43071, Q6XBF8, P51861	Multidrug resistance protein	UniProt
FGFRL1	-15.63	UniProtKB	H0VBE9, U3K650, M3WB79, F1P611, F7GP92, G1MEM1, F6YV96, G1NK99, F6SV06, H2PCN1, F7GPL1, G3WLW1, Q7T2H2, G1QJR7, F7CHS9, M3YIH1, Q8N441, H0XDM9, H0ZKA1, K7FRF9, W5Q421, F1MQI5, G3R495, G1U7G8, H9GHT1, A0A096MXC4, G3T9K4, U3J5Q8, I3NHS9, H3ANA4	Uncharacterized protein	Ensembl
GRB7	-15.62	UniProtKB	H2QCV3, F7ANV0, G1LTP4, F6WKI9, G3RHF8, A0A0D9S379, U3JCL0, F1RX94, A0A096P5D3, F6Q2Z0, G3WQA4, G1KBX6, I3M2Z3, R4GLG5, W5PR15, H0YVI5, M4AR72, W5LK61, M3WCC3, G1PRC1, F7HEB2, H3B289, M3YU50, G3RMB9, Q6H2X7, W5N3C0, G1TZ49, V8PG45, G1QK61, E2QZ71, H0W6Y9, A0A0B5D1A5, H3D2S5, K7FNE6, U3J541, F6UUR1, A0A087Y5N0, Q14451, G1QK59, G3NKA2, F7AFP4, G3NKA6, F7HC81, H0XB64, Q1RMW5, H2NU93, G3TGT1, K7FND7,…	Uncharacterized protein	InterPro
CTSV	-15.6	UniProtKB	Q5E998, W5PEY2, G1T2X2, F7DBV2, H2PST8, M3WXJ1, H2R163, I3MAI4, O60911, A0A0D9R389, G3S2T1, A0A096P273, A0A096P274, G1S4N4, M3Y6C5, F7BPX8, F6U683	Uncharacterized protein	Ensembl
LOC102141274	-15.34
TNS4	-15.22	UniProtKB	U3IK11, G1P2K7, H0VGG7, F6RD82, Q32PJ7, U3JC83, D2HR24, H0YVU8, G1SIE7, I3M518, F6VZB0, F1MN94, H3D9H0, H2SWX1, E2QX58, F6ZL55, G3R2K7, H2QCW7, F7HEZ7, G1KS71, A0A096P5H3, F1RXE4, G3WCW6, M3WBU0, W5PZ32, G3TJG5, Q8IZW8, M3YTA7, G1QN08, H0WJ23, K7F3E2	Uncharacterized protein	Ensembl
FBXL16	-15.15	UniProtKB	E1C7M9, Q8N461, F1RG39	Uncharacterized protein	GO_Central
RILP	-15.14	UniProtKB	H0VGR1, G1QJE4, G3U881, Q687H4, U3IRJ9, A0A096P2A3, F7AVB4, Q687H3, U3JVX0, G1N0R3, G1LMZ2, F7ASG6, G3QRY1, Q96NA2, H2NS55, F1N9R3, F7BU12, E2R525, G1NYD3, H0Z5F6, F6T5H0, R4G9A2, G1SCJ2, K7G3T3, F1RHH9, M3W5M7, E1B8X6	Uncharacterized protein	Ensembl
PLXNB3	-15.07	UniProtKB	U3C8V2, F7E8F8, G1MJI7, H2PX61, F1S2A0, G3SQV7, H7BZV5, F1PXM6, F6U7Q8, E1B9T1, F7EQE5, G1RSY4, W5UJW8, G1P2F1, F7GVV9, M3W1G4, W5PA60, M3YAR3, F6PJL2, H9EWD9, G3UD14, G3U8Z5, H7C3L0, H7C0P4, A0A0D9R3I9, G3W7I7, H0V8S7, G3RNG4, Q9ULL4, G1TBT6, G1KHW4, H0WM62, I3MB85, G3RVC5, F6VYW6, F6QQL4, F6Q5G2, A0A096MVL0	Uncharacterized protein	Ensembl
LOC102121568	-14.94
RAB25	-14.9	UniProtKB	G3QVB1, U3B5Y1, G1PFB9, U6DT59, M3Y0A0, H2R0X3, W5P5S1, A0A096N394, F6V5N3, W5U6J9, F7IIU2, F6XEC1, A0A0C4DGX5, F6V2P8, H0XGH3, V8NHV0, F6XEE1, R4GFN6, C1BM31, F6R284, A0A0D9S4Z9, M3WFQ9, H2N5F1, G1SPC8, I3LX30, H0YZP7, Q58DW6, P30287, G3T3C2, P46629, G3WJN5, F1RLQ0, E2RQ15, H0UYN4, K7G2N8, G1RNZ5, G1M6Q5, P57735, H3ASP3, U3JIV5, B9EPR0	Uncharacterized protein	UniProt
SLC25A47	-14.88	UniProtKB	W5NUY6, J9P9Q5, F6RLL4, F6XY13, G1LXA8, G3WM98, M3WCI4, G3TBL5, G1PIW6, F7AZE3, H0V2R4, G1NKT1, U3I6E7, F6Q8T6, G3V374, F1SAP2, G1TYK0, F1N156, H0WFW8, F7HWE1, G1TA70, W5LM08, F1NLY3, H2NM91, Q6Q0C1, H9GJX1, G1QJW5, U3JJ53, I3MLB0, F7HT81, G3R3T5, A0A0D9RD90, V8NT70, H3A1A2, M3XUZ3, F1P8V4, K7GCX5, H2Q8X5, A0A096NJR7, G3TZ18, A0A096NJR8	Uncharacterized protein	Ensembl
LOC102119867	-14.84
TACSTD2	-14.78	UniProtKB	U3KL08, G1NR03, F1S7A4, G3TS55, G1KG20, A0A096NFV1, M3Z8Y2, H0V819, F1MSN2, G3R8Z1, K7EXJ3, F1NJR8, G1L072, W5PET7, H2N787, G1Q9C0, G1S9N6, M3VZE2, H0ZH91, H0XSY4, H2PZ48, F7GC38, P09758, I3LZR2, G3VAT9, G1T6B6, F7DYG8	Uncharacterized protein	Ensembl
RASD2	-14.6	UniProtKB	Q96D21, G1KST5, U3CMA3, G3TKF0, G3VR59, K7FNU0, F7D0V3, F7D4Y6, J9P1N2, G1TTQ8, A0A0D9R747, M3WX22, H0WSI8, A0A096NJS4, M3YM77, H2QLK3, H0ZKN9, F1NCA3, G7N3Q1, G1NJB8, U3IJX8, A2VDP3, U3KFA4, A0A0B2VFH6, G1PMI2, F6PME2, F6PMC5, G3U1K7, W5QB14, G1RW32, V8PF78, H3ABU0, V8PEV6, H2P474, F7AF34, D2HSS3, G3QEZ0, F7F531, I3N699, A0A0C9QTN5, H0VQ42	Uncharacterized protein	UniProt
LOC102118478	-14.39
LOC102126883	-14.38
AQP3	-14.26	UniProtKB	G1TEK4, U5L1A6, U5L0J9, S5FQI5, F7CWZ6, H0YTV5, U5L131, L0SWL9, E2RI15, G3VKB1, U3K5X8, U5L0E9, U5L0E5, U3I9U2, M3VZ09, H0XB21, G5CTG0, H2QX53, H9GJ70, W5PI64, B4E034, F7H7R3, E4W5Y6, A0A0D9RC87, A7M7C6, B9VRI6, G3QN14, H3A425, A7J2I2, D0FZC5, D3PIJ2, G1QYY1, I3MQG2, W6CIU7, U5L0T6, G1QYY3, F6TFP8, H1ABZ6, G1PK26, F7GJE9, F7DJC3, F1NWH5, F1DQZ7, K7G9X4, B3VQM6, A0A088S579, Q92482, G1MSK6, M3XYA7,…	Aquaporin 3	InterPro
PPP1R1B	-14.24	UniProtKB	M3WCB7, P07516, J3KT77, B3KVQ9, G1U6C8, M3YU77, R4GHX7, F7CUK7, G1LU56, F7E107, F6XIX3, H3B8R2, E2R9P0, Q9UD71, W5PP39, H2QCU6, H0VDR6, G3WRV1, I3LX65, A5X4B2, F1RWM4, A0A096P5C0, F7HE42, G3TG76, W5UJD2, H0WP74, G1PR86, F6S0P8, G3QV38, G3SJV5, V8PFX9, A0A024R1R3, J3KSJ8, H2NUA1, U3JCR6, Q29277, G1QJJ2, F7CTZ0, H9H1G5, A0A0D9S3A8	Protein phosphatase 1, regulatory (Inhibitor) subunit 1B (Dopamine and cAMP regulated phosphoprotein, DARPP-32), isoform CRA_a	InterPro
PHKB	-14.17	UniProtKB	Q93100, H2QB20, H3BQ89, I3MAB5, A0A0D9QZN4, F7AMJ1, F7ABD1, T2M8H2, G1S171, I3L1N3, I3L3F2, F7CHY6, H3BV13, K7G0P8, U3BJS0, Q6LAJ4, H0XAQ3, K7DNJ1, K7CZU8, H0V7Q4, G1Q3L4, G3SY95, Q5ZME3, F1RP07, H0ZEJ7, I3L0Z1, G3U3Z0, F1PUX2, F7AC69, P12798, A0A0G2JLB9, A0A096NI40, G1U904, I0FSM0, W5Q4J1, G3S999, U3CYM0, W5Q4J0, F1PX65, M3XV58, F6RC36, G3WF90, H9GKP2, K7CKL9, G1MAY4, U3JBG4, F1MJ90, I3NHZ9, U3J…	Uncharacterized protein	InterPro
LOC102136236	-14.07
SIX2	-14	UniProtKB	R4GMI5, L0N4B7, M3YKQ6, F6Z031, F6SPS0, G7N9Z8, H0V0F2, D2GUA0, G3UMV3, W5P7Q5, H9Z4J4, F1S5K5, E1BJ27, G3WYW6, G3WYW5, Q9NPC8, I3N8E1, G1QCC7, F7C4U0, U3KET7, G1TWB1, F7HAN3, H2QHU8, A0A0D9RLL8, G1S4P9, K7FN86, M3XCY0, G3QZU3, F6ST81, G3TY89, H0Z093, U3IKS5, E2R181, H3B1Y7, U3B6B4, Q8TBA2, H9G831, H0Y1T2, A0A096NWW4, H2P6C6	Uncharacterized protein	Ensembl
BHLHA15	-13.97	UniProtKB	H2QUZ6, F7DV83, G3TM13, G1NR88, Q7RTS1, F6SCX7, H2PLH0, G1U161, K7EZM5, M3Z8Q4, G3WSJ7, A0A096N5S4, E2R952, H0XJX5, F6SRS1, F1RFL0, A0A0D9SDQ7, F6W7J7, G5E6I7, H0W8U0, G1SB48, H3B107, F6Z4I9, M3WQH8, G1Q0P8, H9GIT3, I3N127	Uncharacterized protein	Ensembl
LOC102124484	-13.97
LOC102119722	-13.92
PVRL4	-13.76	UniProtKB	W5PIA2, F7HC87, G3RUX4, Q5E9Z9, K7FJN9, Q96NY8, H0WUR9, A6QLR1, F6W8Z1, G1MAS5, M3WSM2, I3NH09, M3YRZ7, H2N525, F7GGF7, G1SHE1, F7C2A7, H2Q0F6, A0A096ML66, H0VT28, G3WUK5, E2RN46, G3WUK6, F6V1B5, G3SXQ3	Uncharacterized protein	Ensembl
LOC102132096	-13.47
C1H1orf172	-13.32
SPDEF	-13.31	UniProtKB	F6SVC8, E6ZEW9, F6ZPZ4, F1N9W6, M4AU35, K7FB00, H9H0G1, D5KJI6, U6CZW0, U3ERG2, D2GYX9, W5MUZ3, G1KRL3, F7CP53, A0A096NHL7, W5LBN2, H2PIR9, G1RAF2, W5KP33, M3WMG1, G3QDQ3, H0W9K5, M3XVN4, I3KBS8, H3BBT1, H9FE72, H0YU66, W5PM57, A0A0D9RBQ1, A0A087YAY3, U3ICL2, F7EFE3, O95238, G1SXZ2, F6Z5M2, H2LSR8, U3JMC4, G3U1K9, A2VDR4, H0X4F8, I3MWR6, G3VR01, H2QSV0, F7I581, G3SQ40, E2RGK1, G1Q801	Uncharacterized protein	UniProt
LOC102136368	-13.3
CHRM1	-13.28	UniProtKB	Q65YZ4, F7EL12, F6SLG5, I3M4D2, F1PT23, F7HUF6, K7EXZ6, G3RJP5, H9FPG5, W5NM59, D2HS68, P04761, G1QWJ4, Q53XZ3, A0A0D9SCU6, H9GG54, F5GZF8, T2MH27, H0XLS9, P56489, H0W4R2, O88613, G1SR55, F1N5C5, H0W7K7, H2Q3X5, M3VUK2, M3Z8F0, H2ND32, A0A096NB06, H3ANW3, F7IPY9, Q5R949, P11229	Muscarinic acetylcholine receptor	UniProt
SH3BGRL2	-13.17	UniProtKB	G3TBN7, G1KTW0, U3I664, I3N569, A0A096NPI1, Q5REQ9, M3W482, A4IFC4, U3JJ19, Q9UJC5, F6W7Z4, H0UW76, F7FR72, G3WN83, K7E2N2, G1M266, G1RP83, K7FTV5, F1MR08, W5PAX2, F6Y6B4, I3LII5, G1PFS2, H2PJN0, M3Z320, G1NLX5, H2QTB2, G1SRM8, F7DLS3, H0ZQR3, G3RN53	Uncharacterized protein	Ensembl
LOC102120121	-12.95
OVOL1	-12.9	UniProtKB	A2T6A6, G3VMQ6, H2NCU1, W8CCJ6, A0A0D9R6M3, G1DGB8, F7AYE5, K7F4Q5, I3M1R4, W5Q8V0, H2Q442, A2T7A4, G3V1B0, M3YJJ5, A2VDT4, A2T7W2, H0XFH3, M3W8L2, A2D5A4, G1U8D6, A1YGE1, Q86XL8, G1PC66, E2RIZ1, F1RU16, O14753, F7F0J6, U6DWM7, F7C4B4, G3TFK3, G1R1J8, T2MJL9, F7FXK2, A1YF55, H3ATA9, G1MG38, G3QYI1, A0A096NCN0, H0USZ2, F7FEA8, G3RTV3	Uncharacterized protein	Ensembl
EPCAM	-12.84	UniProtKB	U3J672, G1NZZ1, G1RAJ6, Q5F381, P16422, G1KPA6, A0A096NW30, U3CL60, G1LI25, G3SY16, M3YHZ3, I3MBZ3, F7GI03, H2R8U1, F6R6Z6, F7GD08, H0Z503, U3K9F6, W5P599, F1Q1M9, G3RPB1, G1SQK6, F1PM51, K7GBL7, F7EB13, H0V1L4, H2P6A6, Q3T0L5, F1NV09, F6ZK85, G1N0W4, F1MEP6	Uncharacterized protein	Ensembl
LOC102137816	-12.69
WFIKKN1	-12.67	UniProtKB	E1BKQ4, S4RSN3, H0WS00, I3L9X4, F6WEE0, M3X3I7, G1PFJ9, H0VVF0, G3QY00, F1NMX3, F6S158, A0A0D9RJQ5, G3U7H5, D2HDW5, F6TNR6, W5PSN5, G3W6Y2, E2R5L0, Q96NZ8, M3YX25, F7D2F1, U3JQ30, F6TBX8, H2NPK5, I3MZ37	Uncharacterized protein	InterPro
TRAM1L1	-12.66	UniProtKB	G3UMJ4, G1SKI7, H2PE65, J9JHM2, Q4SMU5, G3QD22, M3X3B1, A0A096NBX0, G1S9G3, I3MF56, D2H9J7, F7HQE5, Q8N609, G3N1U0, W5NQ10, F7HFS7, E6ZIN4	Translocating chain-associated membrane protein	UniProt
SUMF1	-12.53	UniProtKB	U3KGK0, G3RIP3, A0A096N097, G1KJZ4, Q0P5L5, K7GIF5, G1PT30, I3N6Y9, F1SFL4, F6WRM3, G1T344, G3T5A6, E1C234, H2QLZ3, F6R409, G9KRW3, U3I704, F7C2X3, G1MBP4, H0ZIZ0, Q8NBK3, F1P978, G3WCA5, H0WNA2, H0VS02, M3WQQ7, F6RT23, W5PF79, G1NCC8, F6Y1L0, H2PA75	Uncharacterized protein	Ensembl
ELMO3	-12.41	UniProtKB	F1P6Y1, H3AWM5, A0A096NJC8, H3C7N1, H3AWM4, A0A0D9QUZ9, I3N3Y9, H2NR66, F6UJU9, H0VHV3, W5K242, U3JXA2, F8W9E7, Q96BJ8, M3Y2T1, D2H9D9, F7CFX2, U3KMZ6, S4RA56, U3IE12, G3PL02, A6QR40, A0A087XMR3, F6V8Y7, M3ZIG3, G1QWP1, M3WB43, F1RFW8, G1MUA8, G1NUW6, H2RBU5, H0Z504, H3CTT1, F7E1P5, H3CTT0, W5NXV3, G3R8E4, F1NI18, V8NNZ6, U6D031, W5MGQ7, G1SYE9, F6PPC4, E2REZ5, G3SXX6, H9G630, H0WFJ4, G3WCY3	Uncharacterized protein	InterPro
LOC102135602	-12.33
FAM20C	-12.32	UniProtKB	A0A0B2VSM1, Q8IXL6, F6XLD3, G1RRQ7, F7CXH9, I3N4D2, F1MXQ3, U3KHR7, K7F8T9, H9F4W8, H0VMC1, H2RIN5, H0WYH3, G1PN69, A0A096MNF3, E1C4X0, H9G3L5, G1MSD1, H0ZDY3, M3XEG8, F7FTS0, F7CLQ3, U3II66, G1L894, H9KWN5, G3WR99, G1T067, F7C042, W5P862, G3TFS7, M3Z2F6	Uncharacterized protein	Ensembl
CAMSAP3	-12.3	UniProtKB	F6SUH5, H0XLQ8, A0A0A0MV71, W5NUL9, M3YA46, G1QJM8, F7DC25, H2PA85, G3S4S2, H0VWE0, G1LPE4, E1BPZ9, V8PIX6, G1TX26, I3IZS8, F7BXA1, F7DHE5, G3QJ26, F1SCH4, I3IZS7, G1KVF4, F1PUU3, H2QF66, G3U7T7, F7DSX1, A0A0D9R7M8, W5MJE4, G1PH76, Q9P1Y5, I2CXE6, I3N5X9, M3WXR6, H3A647	Uncharacterized protein	Ensembl
GPT2	-12.15	UniProtKB	A0A0D3U6T0, E1BU49, F7IGN7, A0A0D3TG07, A0A0D3UAX1, A0A0D3TGS5, A0A0D3UJX0, A0A0D3UV09, A0A024R6R2, A0A0D3U1C5, Q94B38, A0A0D3U3B9, A0A0D3TKS8, A0A0D3T7K0, A0A0D3U9Y7, A0A0D3UIJ9, A0A0D3AAU8, A0A0D3UJ45, W6FFG6, A0A0D3TAN9, G1T9U7, A0A023ZDJ2, A0A0D3U1L6, A0A0D3UWW0, F1PHG2, A0A0D3TJH7, H3BU54, A0A0D3TPQ3, A0A0D3UQU7, E1BF40, A7A027, C7GX72, A0A0D3TLW4, A0A0D3SZ76, K7C2S9, M3Z9K6, A0A0D3TB29, A0A…	Gpt2p	InterPro
ASS1	-12.07	UniProtKB	H0XSE0, Q5ZJ23, H9ESN2, F6QXP1, K7FGX4, F7G4N7, K7A695, F6QCM2, R1F6E1, T2MHY4, E1BR38, U3ITA4, E2QU08, G1SWF2, K9MQ67, G1N172, H2PTN8, F7H1F8, H0Z2J6, G3SMU8, Q5T6L5, K6ZGI5, H2QY18, M3WZN9, I3MHN0, F7HM09, P00966, G3WQZ9, F1S0X9, P14568, F6V047, H0WCW8, A0A096P0G1, H3BEB4, G1Q1S3, F7D8L9, M3W3H5, G1RPP0, G1MCK8, W5PCU1, G3R3Z8, G3URD8, U3JFF1, M3YMP6, F6SQA8, F0Y8G0, A0A0D9RVN8, Q5T6L6	Uncharacterized protein	Ensembl
LOC102141346	-12.04
MTRNR2L7	-12.01	UniProtKB	P0CJ74	Humanin-like 7	UniProt
LOC102132651	-11.86
FNDC5	-11.83	UniProtKB	G1N0I0, K7FGZ6, H0XCQ5, M3W0L0, M3YUT4, F6SL20, G1TGS5, A6QQK4, F7A8L6, G3WFM1, H0WBH5, F7BWY9, F1PLK7, A0A0A0MRR6, H2PYL1, F6WXN7, H0YSW9, Q8NAU1, H2N840, A0A096MR43, U3IF38, U3JCV6, G1QGG9, G3R3G5, I3LYV6, G3UF47, I3LLC7, F1NJU4, G1LLN9, H9G7P6, W5QI94, F6YV69	Uncharacterized protein	Ensembl
LOC102140499	-11.76
ETV1	-11.72	UniProtKB	I3LUW2, Q2KIC2, H0V2T8, H0YWB4, G3T1C6, H3AMF0, G1NCB8, F7AF60, F6W6V2, U3EZU0, P50549, C9JX69, K7FN38, H9FR59, G3W5J4, F6Q8Q2, U3F503, G1S2R0, G1TBZ4, F6V933, C9J4P4, I3MH12, F7HSR6, H0XFC3, H9FR60, A0A096MVB6, G9MD27, U3K5W0, F7AFA4, A0A0D9RLN9, F6VU65, F8WEH6, F6XIT6, G1MD10, H2RDI8, G1KNE4, U3IHE9, C9J0B7, F7HBR5, F7G8K6, W5PD17, H2PMS8, G1PNK8, C9JQH6, C9J9L1, M3YRH8, F6UAF2, M3XFR0, A0A024R…	Ets variant gene 1, isoform CRA_a	InterPro
TEKT2	-11.64	UniProtKB	Q1W6C3, G3TIK1, W5QEB5, Q2T9Q6, E1C1A3, Q9UIF3, H0YTR1, G1RKB9, F1SV60, F7G6Y1, G1T0G8, F6ZVI6, H9G7S2, G1PIF4, H0V752, R0JJL5, G1L0W0, K7FV05, H2N804, M3WH02, F7GFM8, H2R2T7, G3QMF8, F6RC90, M3YTQ3, G3VSY1, H0XMC7, U3JDJ7, I3MF40, A0A096MM03, F7GY66, Q4R5V1, G1MXD4	Uncharacterized protein	Ensembl
TH	-11.61	UniProtKB	P07101, H0Y677, E9L3I0, A0A067Y229, H0VLS4, Q6XBR7, M4GJ62, I2FKE7, P78428, P17289, I2FKE8, A0A0C5LBQ9, G3U1E7, A0A067Y239, E9L3J0, E9L3J2, E9L3J1, B2KIN8, E7EQI0, Q9UQ57, E9L3G7, U3KAM3, D6PV24, B7XAK2, E9L3G5, A0A067Y243, E9L3G4, Q8HZ54, Q8HZ55, B7NZU5, B3RFH4, Q8HZ53, G0T3N1, G1L5Z0, G0T3N2, C8CE48, A0A067Y246, A0A096MSC3, E9L3H6, H2Q2W7, E9L3H5, G3VG52, D7PVG6, E9L3H8, E9L3H7, A0A067Y250, M3Y…	Tyrosine hydroxylase	InterPro
DIRAS1	-11.52	UniProtKB	V8NEJ3, U3I2W6, K7EN06, A0A0D9SAW3, F7E991, F7FY67, H9H237, W5Q4Z8, G5E6L2, K7F3R0, G3QPG9, R4GLP1, H9GZP1, H2P0P1, G7NL76, A0A0A0MWM7, M3XBF6, F1S8G8, O95057, U3KJU0, H9GE39, I3MU51, G1SBI5, Q4RMS0, M3Z8D3, D2HTM7, F1Q1F0, G3WDC2, H2ZV71, H2R6H8, H0WGA0, G1NYJ9, F6RT27, F7FWP4, G3THF1	Uncharacterized protein	UniProt
LOC102141542	-11.46
XK	-11.41	UniProtKB	W5QC82, F7G8H0, A0A0A1E0F2, G1KQF2, G3RIZ4, H3AVK6, D2GWX0, A0A0D9RZM6, H0Z8Y8, G1P638, A0A096N4Q0, M3VZS8, F6QSG2, K7FHG7, H0Y0G1, R0LHP4, M3YLX7, F6U2W7, G1QJI4, G1NP56, U6DRR2, F7DVW1, I3N3P8, P51811, U3CQG3, F7D5J1, W5UFG4, F1RXS7, G3SZS2, F1NTV9, G3W5R9, Q2Z218, J9P1I8, G3X709, H2PVA3, Q49LS5, A0A0B5A122, U3JFW1, H0V5S3, H9F7E4, H2RB19, F7FZN6	XK-related protein	GOC
RNF152	-11.4	UniProtKB	K7F1B6, F1SMU5, E1C2W7, H9F312, F7HAL4, F7BN35, G1NR26, G3QXM6, Q4SWU7, V8NUJ1, H0W4I2, H2QEM2, G1NT81, A0A0D9SDS4, Q8N8N0, M3VXK9, U3KK12, D2H6Z0, I3N7V0, H2ZX84, G1RAV6, A0A096NAU2, G3UM22, H2NWG7, H9GHR8, G1TCT9, W5P1M5, K7EMG3, F7B6P1, F7EP71, J9NXR2, F6PLF8, G3WHX2, H0WT01, E6ZJF4	Uncharacterized protein	Ensembl
PRSS8	-11.35	UniProtKB	F7EAI2, H2QAZ8, G1LKX3, A0A096NHX9, Q16651, G3T346, H9ZBC7, F1MUB9, I3N3W4, H2NQS2, H9GBW2, K7ESY0, F1PD94, H3BUJ8, H3BVC8, U6D1X7, F6TMC3, G3UB22, K7FME4, K7FME9, F7BC37, G3RCP6, F6S6A4, G1SH91, W8BSD7, F1RIS0, H0XB89, M3VYT9, G1P378, H0UV76, F7IEK2, A0A034WGH7, G1S291, Q08DU0, W5PG90, G3TP78, V5GJF6, A0A0D9R095	Prostasin	InterPro
ZBTB42	-11.28	UniProtKB	U3KKF9, H3C4P0, G3X7S0, H2UCP7, K7EXH7, E1C0A8, H3AD93, I3K2F4, G1NR15, U3ATL2, A0A0D9SDZ8, G3W349, F6YAG3, H2MR96, H0W4B2, F6QNH1, B2RXF5, H2REQ1, A0A087XWV7, H2NME6, G3NSK1, W5N4Y9, M3ZWW8, H2UCP8, H2UCP9, W5PBK9, G1KL54, A0A096NK33, G1LME9, H0Y195, W5LTC9, I3N6T7	Uncharacterized protein	InterPro
PGLYRP1	-11.25	UniProtKB	F6V9G7, F7DQG1, Q8SPP7, G1L198, O75594, J9NWJ0, H0UT35, G3R6A3, F7FSD2, G1ST17, I3N1R2, Q9GK12, H2QGM5, H9H398, F1RM24, A0A0A0MWS4, M3WZT2, F6MFD5, W5PLB7, G1PLL3, G1QPS3, H2CNR1, H2NZA6, A0A0C9R2T5, H2CNR0, A0A0D9S271, G3SK43, B5T254, B5T255, G3WWY1, H0WW16, M3Y205, K7EDK3	Peptidoglycan-recognition protein	Ensembl
CHMP4C	-11.16	UniProtKB	G1NSE7, M3XDE0, F7FS96, Q2HJ35, Q96CF2, G1KP71, G3WAS6, H2QWC8, M3XRS7, H3AHT6, M3XL22, H0ZN64, G1SRU4, U3ICH3, G1QQI6, H0XCC9, H2PQP0, G3RKJ9, K7F341, A0A0D9RLB1, A0A096N241, E2R7B4, W5PZJ0, E1C252, I3MK08, F7H7C4, E6ZJ23, F6SNN9, F7G5G6, G3T7Y1, G1NGL9, H0VPD1, D2H4W1, F6U218, U3K1V2, I3LG19	Uncharacterized protein	Ensembl
LOC102127944	-11.1
SLC6A8	-11.1	UniProtKB	F7ET12, G3TZA1, G1TFF9, G3W4V8, F7H0T4, W6FFA7, H9FYN6, H7C249, P31661, H3A4N3, H7C1I2, P48029, H3A4N2, U3C618, U3EZE3, G8HT74, M3W1G1, F7DGM8, O18875, H9H9V8, H9ENL8, H9ENL9, F7C3A6, X5D7P6, K7BYC7, F6QIX1, G3FM76, F1MTW1, X5D2U0, F7ET00, S0F328, X5DR98, U3F9M3, X5D9C4, F6Z838, H2PX56, F1PZI9, F6YIV0, F1PZI7, F7H5X1, H7C222, U3KF24, K7DP91, A0A023JDV9	Creatine transporter SLC6A8 variant D	InterPro
LOC102143933	-11.07
LOC101925605	-11.06
LOC102115789	-11.05
PLXND1	-11.04	UniProtKB	F7GEJ6, H3DKN8, I3NCB3, S4RGT4, A0A0D9R9V4, M3VU38, H2P9C8, H2TQT6, K7CMC6, H2TQT5, H2TQT4, M3Z0L8, H2TQT3, H2TQT2, H2TQT1, H2TQT0, H0Y9D1, M4AS82, H0YAM9, F1N4C5, H0ZJX0, W5LCV1, G1PQT9, F6QUU6, W5PVZ6, D6RH25, F7ET52, H9GKU4, G3SRJ7, G1QZL1, H9KW74, H9FEG5, H2QNC7, F6U223, H0X2B7, E2RDE1, U3KGX0, A0A087Y838, I3KKS6, F6YTL9, G3RVX2, G1ND52, G1LCP6, G3NF07, W5N5Z3, H0YAB2, G3QEM8, F1P2X8, H3AVW2,…	Uncharacterized protein	InterPro
APOF	-10.98	UniProtKB	Q13790	Apolipoprotein F	PINC
SH3YL1	-10.93	UniProtKB	H2P732, Q96HL8, L7MZM8, H0W413, G3VU84, G1PVX3, G3SRG3, G1RAB6, M3XDK0, A0A096NIH3, U3JH17, G3QF02, G1T7X5, G1NMG2, H0XLA4, U3IXV8, H2QHC8, H9GW32, F1Q0G4, F6ZUU3, F6XJ09, W5P554, H9F550, F1NNR2, D2HQV3, F6RB94, H0ZRT8, I3L9U9, M3YMW9, K7F324, I3M0J6	Uncharacterized protein	Ensembl
ENTPD3	-10.92	UniProtKB	O75355, H2PB36, U3BZU0, A0A0D9RWH2, G1KBF4, Q58DI0, G3TIK2, G1L4G9, E2RE57, A0A096N190, I3LH47, H0WKD5, F6VBM0, F6TKH7, U3I732, G3VBW2, U3EZ83, G1QGF0, W5NXH9, G1SZ11, F7FVJ7, I3ME34, M3Z2N6, F6Q0U6, K7FVQ3, F6RBQ4, U3K3A6, G1NFL8, H0Z0D3, H3B6T0, A0A0B5CU77, H2QMC5, U3FIW6, F1NZ12, C9J0J3, M3VXA2, U3BWY8, H0W990, F6XK13, G1R107, V8NKZ5, F6TMK1, G3QQQ1	Uncharacterized protein	Ensembl
PACSIN3	-10.79	UniProtKB	Q1G1I6, G3WXG1, H2Q3I5, E9PQ12, A0A096MXU5, A0A0D9R066, H0ZJS2, F6S7P6, E9PNM9, D3DQR0, F6Q4M2, G1LL04, E9PIY1, F7DJP0, G3TGI3, H3BI70, I3M9Y5, V8PDY1, G1PXC3, G1KBN3, Q9UKS6, G7NDG4, E9PJ75, E1BK71, F7HBS8, E6ZGU4, M3WHA5, H0YDM6, H0X6U3, E9PJ33, K7FMN3, F1Q433, H2NDJ8, F6YHC0, G1NEA0, G1TYV3, M3Y0K1, G3QZQ8, G1RW53, U3IK76, A0A0C4DGG1, F1Q436, F1SIC0, W5P5I5, G3UQ34, F6YHE3, U3JUW2, H0VNJ3, E9P…	Uncharacterized protein	Ensembl
PCDH1	-10.72	UniProtKB	G3UEF6, F7E1W0, H9F9D2, U3CXB0, A0A0D9RJ19, F6V7J1, K7EU35, M3Y9C7, F7E1P4, G1PTW3, M3WBC6, F6QZS4, D6RAX3, F6Q0C0, I3NDB1, G1KPT0, G1TCM5, H3B8A5, H3B8A4, C4MH74, G3QFB6, I3L7J4, H2RF32, G3S6P4, D6RBG2, F7DRI0, G3WGG6, A0A096NY96, H0Y9F5, H0V677, V8NR75, G1REY1, U3JJW6, H0XSE3, G1MR82, F7ET26, F6R8M6, A4IFK1, E2QX93, Q08174, W5NT74, K7FPX5, W5NT76, U3DMM4, H0ZWN5, G1LUQ4, U3KM16, I3N5R9, U3IIM1	Uncharacterized protein	InterPro
PRR15	-10.53	UniProtKB	Q8IV56	Proline-rich protein 15	UniProt
SERPINA3	-10.49	UniProtKB	U3E673, U3B3D1, G1TM88, G1S675, A0A024R6P0, G8JKW7, U3BLI0, F1NPN5, G3V5I3, P01011, U3B3C6, G3V3A0, G3V595, U3FFU0, U3DMZ2, F6SL79, E0D8K1, F6WY91, K7CRE6, U3D0A4, K7A8Q9, U3ECV1, F6SL92, F1PH87, F1PH86, Q5R536, A0A087WY93, H2Q8V6	Serpin peptidase inhibitor, clade A (Alpha-1 antiproteinase, antitrypsin), member 3, isoform CRA_c	InterPro
PCDH10	-10.44	UniProtKB	U3J4J1, F1N2W7, H3A0L1, C4MH78, A0A096MS89, I3LX04, H2RBJ6, H9FBP0, G3WRA7, G1KP99, H0YTY2, X5D2R8, U3E093, G1MAF4, U3CJ20, K7G6X3, G1PKG0, A0A0D9S0V7, M3Z0Y2, I2CY83, F1NWJ4, I2CY84, H9FBN9, W5UF39, U3K976, F6ZA53, W5PYP6, F7IEG7, I3L8M6, F7IEG9, Q9P2E7, H0XZR8, X5D999, Q14DV7, H2PEB5, H2QQ62	Uncharacterized protein	InterPro
EPN3	-10.07	UniProtKB	H0W2Y3, I3MTX3, H0X0N2, G3SZB5, H2NTN0, F7H9Q1, H9H9F4, G1N9Z4, M3YVL1, H0ZFC5, E2QUB6, U3JF42, M3WGR3, G3VQA4, F6S6P9, K7FLE7, G1P527, G3SDT2, F1N4F8, U3I655, W5P1Q8, G1KDN4, Q9H201, A0A096P4J3, F7HNB8, G1SI58	Uncharacterized protein	Ensembl
HES2	-9.97	UniProtKB	A0A096NWY3, K7EJN2, F7GB93, E2R0N6, F6VP18, F7GBA0, F7BSU1, I3MLE0, H2PXW8, H2PXW9, T2M2P3, F6WM03, G3UIT0, F7GEY5, G1SF50, H0VUD8, G3SAB1, F6WM22, M3Y664, A7E326, G1LT94, G1LT91, H2N9A9, H3BB93, K7EJQ0, H0XTX3, F1RIL7, A0A0D9S8S7, G3QHJ0, Q9Y543, F1N0L3, F7GEV3	Uncharacterized protein	InterPro
LOC102127967	-9.96
LOC102138034	-9.85
TMEM125	-9.64	UniProtKB	Q96AQ2, H9FPW1, R0LQZ2, F7GKL3, Q2HJ59, V8PH93	Transmembrane protein 125	UniProt
CPD	-9.63	UniProtKB	H2R485, G1N356, J3QQJ4, G1LB60, F2E2Y8, H9EYU1, V9NGM0, F6XHA5, W5PLS0, M3WNV5, H0Z864, J3QRJ9, F7B1T4, Q90240, P83852, V8NG54, G1NY58, F6XTA7, U3JUJ6, M3YQX4, E2R830, F6UFH2, E1BLR9, K7FD74, F1RN68, H2REN2, U3IQ52, K7CU50, H2NT76, A0A096P3M5, A8MRD1, H3AUD7, T2MIG8, H0UXX7, G1SZF9, G3SQE2, F6XT55, D2GU00, T2D2V2, A0A061S7Q8, G3VVR7, E1BYS4, G1QU52, I3M3W6, O75976, A0A0D3EHK5, H0WLY7, F7D7Y9, A0A…	Carboxypeptidase D	UniProt
ESRP1	-9.53	UniProtKB	F7FQS7, I3MMQ7, H3ARY0, G1SF68, M3WCD3, G3WZ44, H0VKW5, U3DEN0, U3BGC8, F7EYA4, G1NWF8, G1QSY0, F7EY69, G1NHJ1, F7GW76, M3YBR1, H2PQT8, F7DV79, U3JSH7, G3QM39, E5RI26, A0A0D9RJN4, F1RY52, F1PQY5, V8PBB8, U3J2J3, F1MVN3, H0ZNU1, T2MC02, H0YBR2, G3SNN5, G1QSX8, A0A096NBY4, W5PAU2, F7G0J0, F1PSN8, G1KC77, G1LGN5, H2R3C2, F1P509, H0YBB3, H0WHH6, U3BZA4, K7F2Z4, F7EY81, Q6NXG1	Uncharacterized protein	InterPro
KRT15	-9.47	UniProtKB	H0X4V7, A0A096P5M9, H2QCZ5, M3Z7E8, M3VXK0, F7A670, F7AC83, E2R8Q7, O77727, I3MMU8, F1NDN5, J9P4Q9, F7A679, G3SKF9, Q17QL7, A0A0D9S2G3, A8MT21, H0ZYH4, P19012, F1S0K2, U3JC50, G1LFY0, G1RIN0, G1Q9A4, U3IN00, C9JTG5, Q5K2P2, G3TJ27, W5Q6A4, G3U1R6, H2NU32	Uncharacterized protein	InterPro
NRTN	-9.39	UniProtKB	W5M5U7, A0A087X4N1, U3KL03, H0XFL7, G1RTZ0, E2R534, G3SLU1, H2NX62, H9Z109, E1BKU1, V8NA01, G1MRY5, F1SBU4, K7FB94, Q99748, H2MUX5, A0A0D9RBS2, I3KQH9, F7G3A3, H0VYC6, H0YRY2, I3MDR1, H0YRY3, A2PYM3, G3S6Q7, G1P8N3, F7ICQ7, M3ZEN8, G3QTT4, G3WNN3, F7ICQ9, A0A0A0MWA8, H9H8J6, H2QF36, F6S503, Q4RWR8, W5M5W9, U3IAM0, G3PX72	Uncharacterized protein	UniProt
LOC102138799	-9.26
SPHAR	-9.24	UniProtKB	Q15513	Protein SPHAR	PINC
FAM3B	-9.16	UniProtKB	E1BQ21, I3M7T4, H2P368, G1LER4, F7DV13, F1PA58, G1PQ95, U3J8I1, H0WV17, F6WGU6, H0Z4A7, H2R4F0, U3JHE1, G1RBB9, G3RGM5, K7FV07, P58499, M3VXN0, G3SWU4, G1NP09, G1K9J4, F7EQF0, H0VMZ3, G1TXJ2, F6SNU0, G5E7Y1, F1NY95, A0A096NIY2, W5PKF3, M3YBC4	Uncharacterized protein	GOC
SEMA3B	-9.08	UniProtKB	H0XPR8, F7AP03, G1KIX8, G3X2Y8, E1B9T2, G1SHC6, H2PAP4, E2QYF5, G3SES4, I3MR39, G3TD60, G1LZE4, H9L2E3, Q13214, H0Z843, A0A096NY74, M3VXP6, W5PJV8, U3K2C5, F1SPP4, J9P5R7, G1MYR4, U3J763, H0VND0, F7CEG7, F7IHI0, M3YNU1, G1R5M9	Uncharacterized protein	Ensembl
MARVELD3	-9.06	UniProtKB	H0Y257, A0A096NSH4, H2NRE9, F6UGN0, I3MVB2, M3ZI04, E1BTD0, A6H721, A0A0D9QW87, Q96A59, H0VKS6, H2RA18, H2RA19, M3WFZ0, W5MV41, F7CVN3, G3R0G0, H0YUX0, A0A096LT50, S4RZ37, H9GIC5, F7GZK6, G1PBZ2, F7I2S0, F6QXI8, V8PAW4, E1C7B8, G3URG8, W5P140, W5KQE7, U3KEW2, F1PID2, F6RG57, F1S3D4, F1S3D3, M3Y935, G1SYA3, H3A964, R0JD12, G3NLV7, H3CL56, K7F5X7, H3A0T9, H3A0T8, G1R1B8, G1L6I4, J9NYT4, G3WZ13, G3U…	Uncharacterized protein	InterPro
HOMER2	-9.03	UniProtKB	H0YNR9, M3YVT5, K7FH04, F1N9M6, H0VRL8, F6WSQ1, H2V3M2, H9G9H3, H2V3M3, H2V3M4, H0WXJ9, U3K9J2, G1N6W0, F6YP10, G1NW02, G3RI65, G3TYX1, Q0VCH1, A0A096NN09, W5PWS2, G1M6T8, F1PI91, F7H931, F6PNR1, F1RIA0, Q9NSB8, M3WXJ0, G3WZ75, G1TB52, F6PNT0, F7ILZ2, H2Q9Z5, G1RJ92, H2NP23, I3MCA7, R0KS59	Uncharacterized protein	Ensembl
IRF6	-9.02	UniProtKB	Q08DD6, B1AJU4, F7E812, F7BU60, A0A0A7P6R3, K7GPS3, Q8WNQ4, H2Q125, H3BH00, G3SNG5, G1P2L2, O14896, G1MZ34, M3XVH5, W5PT46, W5PT47, U3JCL5, F7FV91, E9LK28, F7FP28, E2QSS0, G1KEV4, U3IP46, G1QN90, K7GT24, K7GLQ5, M3WM06, V8P6L2, H0VX57, H0X396, F1PD68, G3VFH2, H0YTC1, K7F6Y8, H2N3T8, G3MXW7, Q1PS65, D2HIJ4, U6CVZ0, F7E8C9, A0A0D9RRW8, G3QTP7, A0A096N8P2, I3NEH9, F7AM32, G1SKY0, G0Z349, E1BUT7, H0X…	Uncharacterized protein	InterPro
LOC102126833	-8.97
CCDC78	-8.9	UniProtKB	M3W9D3, E1BNT9, K7F6P1, F7HDT1, G3WDL5, G1LLF0, F1PFV7, U3JPS1, U3IAN7, H0YZG8, F7IAM9, G3RDH9, W5PW19, G1RA06, F7DQA7, H2NPM0, A2IDD5, A0A096NKJ3, G3SUW0, G1NUR4, I3M3Q2, M3YWX1, G1NBS2, H0VG34, F7G696, H9G5G3	Uncharacterized protein	Ensembl
TSPAN12	-8.89	UniProtKB	H0VK53, G3SKI9, Q5ZIF5, A0A096MTW1, F1SJF5, G1RM84, H9FS76, H2PNB2, I3LW58, E2R1Q6, O95859, G3WFJ4, F7F891, C9IZ82, G3UFG5, K7FFX0, F7HZ66, C9J9U1, U3K5X0, H0Z2L6, F6WFC7, G3SUR2, G1N996, G1PGK2, A0A024R740, G1KG80, F6T296, F7FAL8, F7I7V6, W5Q9K2, Q29RH7, U3I493, M3Y6Q1, G1U4E2, Q5R8B5, G1LH97, H0WPF1, C9JQM0, M3WSE5, C9JC05, K7FFU8, H2QVA0, H3AYL4, A0A0D9REF6	Tetraspanin	Ensembl
LOC102126261	-8.86
CA12	-8.81	UniProtKB	F7DLJ4, H2NNF9, H9GII6, K7CD80, G3WYX9, H3AUJ4, M3WX27, F7F4C7, V8PGP5, H3CSL2, M3XNH9, F1S092, G3WYY0, H0V402, K7FFD4, F7D650, K7FFD1, W5LF33, F6PRS4, H0WKW9, I3MQU5, A0A0D9RIT7, U3BTM4, O43570, H2LSX6, H9KWT3, F7DLH6, U3B8X2, W5QHY9, H9KWT2, G1RNT6, F1Q441, F1MPL2, F1Q440, G1SM71, G3SP77, B3KUB4, M3ZMF6, U3I6V4, G3NL66, H2LSX7, G1L6D2, W5NCH0, E1BYJ0, H2R264, G1P9B3, U3K7L9, Q9MZ30, W5NCG8, A0A…	Uncharacterized protein	InterPro
SLC2A12	-8.81	UniProtKB	G1PVD9, H2PKD7, G3RBK7, A0A0A9W6D9, H9GG97, D2HJ42, A0A0D9RVY2, U3KBJ7, F6YI71, M3YTN4, H0ZMS0, U3ESK5, H3AUW0, M3WJM3, V8NWZ4, Q5J316, F1P4J7, F1MIV2, F7F0U7, K7F765, H0UWB9, G3VUY0, F1S3R3, Q8TD20, A0A0B8RZ57, W5PZ66, G3UN88, F1PA43, G1RX72, H0XTZ0, F7DHN3, F6T0Y9, H2QTS2, A0A096N1F5, G1SSC7, Q9BE72, I3N078, G1NKB4, G3VUX9, U3IK50, F6W6C8, F7HSW4, Q15I71, G3TCI6	Uncharacterized protein	InterPro
DHRS7	-8.75	UniProtKB	A0A096NVG3, H0YJE4, H0YJR8, A0A087X0Z7, H3BH32, M3Y4J4, F1SSI2, H0WA47, H0ZRZ3, Q24K14, H2NLE7, H9GLZ0, V8PG34, A0A061SD41, A0A0A9W551, G3TZ86, A0A0B2VYP2, Q9Y394, F7IQ56, H0UVZ3, V5G4R5, W8C3E2, G3WLR0, F6ZYE1, G1SH49, I2CTB5, F7IQ82, W5U5P4, M3WDG4, G3TCT4, W5QJ03, W5QJ02, U3ICA9, G1L853, U3JLE6, F7CCB2, G3S996, H0YJ66, H2Q8E4, W8BL68, K7C1T7, E1BV75, I0FSI3, V5GWX9, G1RTN8, G1NLG0, H0WU12, A0A…	Dehydrogenase/reductase SDR family protein 7-like protein	InterPro
SIX5	-8.7	UniProtKB	W5PKN9, H0VQN9, U6D3I4, H9FF11, A0A0A0MXG2, M3X906, F7E5P2, G3U0B0, F6VMC5, A0A0D9S202, G3UMQ5, F7HN42, H2NZ95, H0X949, Q8N196, G3SBS4, A0A0A1XET6, I3MXR8, F7HN28, G3SKB4, E1BAD7, G1NVB8, H0YLK1, F7GEZ3, M3Y2W7, H9F4B8, H2R5Z8, F1PSK1, G1QP80, G1L1Q8, G3QY55	Uncharacterized protein	Ensembl
PRELP	-8.68	UniProtKB	A0A096NPR2, M3YJH3, H3ADS3, D2H8Q9, U3J4F7, F7DPK0, G1SXR1, F7GFP1, H0XWH5, H2R1T6, G1P0H1, A0A0D9RPE4, G1KAA1, F6ZY96, A6QQQ3, Q6FHG6, G3WYF3, H2N435, E1C7T4, M3WQY0, W5NUA0, H0VF43, F6RZ46, G3RIQ2, F7FA61, G1NAT8, E2RL80, G1S918, H1A4C6, F1S6B4, P51888, F1MX63, G1U0R6, U6DRW4, I3N6A5, Q9GKN8, G3U8Y9, G3TTN4, K7G2E4, I3MHJ5, U3JB47	Uncharacterized protein	InterPro
LOC102129172	-8.64
PROM2	-8.62	UniProtKB	W5PXF6, D2HWG2, W5PXF5, G1QGH8, W5NE34, G1MPZ8, W5NE32, H9FDL6, F7HZF4, H0ZHW4, F7D5R8, H9F657, U3J7X9, H3AUP6, H2QIC1, F7HZF0, G3WAK0, U3JBX4, M3WDQ9, H2P533, G3QUE2, Q8N271, F6U065, M3YCJ1, K7FME8, U6DHW2, H0V707, F7HJD9, E1BM92, F7F7K6, G3TGX7, A0A0D9RXU9, G1SMB9, A0A096NGP8, I3NA83, A0A024RE18, G1PC77, F1PQT5, H9G7P3, H0WPV2, F7HZI3, F7HHE4, I3MW51, F8WDW5	Prominin 2, isoform CRA_a	InterPro
LOC102123266	-8.5
TCEA3	-8.5	UniProtKB	G1P0C0, K7FVJ7, F7E9R8, G3W6J4, F1N0P7, H2R320, M3WFG9, M3YWR7, H9F0E5, F7E9R2, H9G9U8, F7EMY6, G3QFQ6, I0FI55, G3TA44, H0YRP4, S4R419, U6D3R7, F7D7C9, F6SUM6, G3U1F1, A0A0D9S895, A0A096MZV4, O75764, V8NV70, I3LP05, F6W6W8, G1LSM6, Q2KI09, F7EMR6, G1MS07, W5PC85, H9FLW5, U3K866, H2N8M7, F7EMV5, U3DVD4, S4R3M9, I3MDQ8, G1RAS8, F6X6Y7, F7GDE5, E2RIY6, G1T6N1, I3L6H4, G3RYH6	Uncharacterized protein	InterPro
LRRC3	-8.45	UniProtKB	Q9BY71, A6H793	Leucine-rich repeat-containing protein 3	UniProt
LOC102130899	-8.42
FOXI1	-8.41	UniProtKB	A2T7C0, A0A096MNZ9, I3MRQ4, H0W2Y0, E0XEY9, U6DGT3, G1QZ13, G1SE68, E0XEN6, A2T7Y2, F6V6Y5, R0JJL7, K7FR90, H2PHB8, G3X2P6, D2I7N9, A1YFQ6, M3YNH5, A2D5C9, F6Y0Q3, F1RR95, F6T6B2, F6PV64, F7C1T8, H2QRZ5, G3S6N6, E1BR13, G1KRV9, W5UFD9, Q12951, G1Q471, M3VVI1, H0YTK2, A0A0D9RCH6, Q4RNB0, H0XXQ4, A1YF73, G1MT33, U3K4K9, W5NYV2, G3UKV8, E1BPY1, E2RRX4, W5NYV4	Uncharacterized protein	Ensembl
SORT1	-8.39	UniProtKB	K7FX93, F1P6N4, H2N6I6, F7I2Y2, A0A0D9S6J4, F6Y0X1, W5QD11, F1S5Z7, W5QD10, G3X0N7, U3ILL5, U3DJD4, G1T670, G1PBJ4, K7D492, H1A418, G1LDN1, I0FU27, T2M7B9, G1KKK9, G1QQW2, I3MGW4, H3B6Y2, F7I2Z5, G3QUL3, H0X9C1, F6V009, G1T661, M3XVP9, G3TIB4, A0A096N384, M3WM95, F6VZ05, Q99523, H2PZK2, H2B2M0, H2B2M1, G3S691, H0V0A1, F7I0R2, E1BKZ9, A0A096NSE6, F6VLF7	Uncharacterized protein	Ensembl
LOC102119094	-8.31
GPR12	-8.28	UniProtKB	G3TDA9, U3HZR4, G1NRD0, U3KK71, U3C187, F6V0V7, A8K2F5, G1TBA2, G3QEX9, H2Q7B7, W5Q6D4, F6QB11, A0A096MKY0, H0ZMU0, H9G725, H3AGH4, H2NJG8, Q6NWS7, Q6NWS8, F7D1X9, Q6NWS6, W5U682, M3Z6F0, U6CX47, F7DDI0, E2RDD1, F1P2L2, K7F177, V8PB46, F1N5H6, H0WTJ7, M3WKV2, F7FZD3, I3N755, D2HP86, A0A0D9SB86, H9FAQ8, G3WPB1, G1NXP1, G1RV32, P47775	Uncharacterized protein	UniProt
SLITRK5	-8.28	UniProtKB	H9F0W7, M3X7P5, F6TF48, R4GL75, O94991, M3Z502, U3IGV8, H2Q7P4, G1U3Y4, F1RP61, G1LRQ9, A0A096N0C7, W5NQT8, G3S4W5, G3U4W0, H9FH40, F7HHZ1, U3KG39, E2QXQ1, H2NK44, H0XNL9, G3W5F4, G1S3A4, F6SYU2, F7D528, H0W529, K7EW95, G1KJF8, E1B8X9, I3N7K9, F7IEP2, H0ZLW4	Uncharacterized protein	Ensembl
RORC	-8.27	UniProtKB	K7FPT4, A2D654, U3FM33, H0W6W9, G1TLF8, A3QU33, P51449, A3QU31, G3PF17, F7IST0, G3RVZ5, D3DV25, F7GZT0, E2RGP7, A2T7J7, A1YG07, G3TLN3, U3JP27, A1YG06, F7HUV6, A2D5K5, G3WTS8, A2D5K6, A0A0F7YC00, A1YFF5, G1L0N1, A1YFF4, B2KI74, W5QIT1, U3FHU5, I3N3T8, G3QII0, F6TAY3, B5AMR5, G1RH57, H2N5U0, A1YET9, A1YET8, G1L0M4, Q6I9R9, M3ZXT2, H3DLW7, W5LIH7, A2T6I0, A0A096MPI9, H3BEA7, F7HPN7, G1QAN9, I3L553,…	Uncharacterized protein	InterPro
CRB3	-8.22	UniProtKB	H0WXN3, A8IDT8, G1PSN7, G1S1D6, G3TBW3, H2QF51, I3M0B8, M3WQI4, F6RUX8, F6Z7P9, H0VZN0, M3Y6C4, F6WKC2, G1LKJ7, H2NX84, W5P6U0, G1TIJ6, Q9BUF7, A0A0A0MVY6, F1SBS8, G3QVX7	Uncharacterized protein	Ensembl
LOC102137723	-8.18
LOC101865747	-8.17
LOC101926796	-8.17
RBBP8NL	-8.12	UniProtKB	F6VAT5, U3J5R8, H2QKQ8, I3N735, G1KDH4, H2P2I8, U3K7K4, F7GGK9, G1S1G8, F7HK85, G1NT44, G1MG85, H0ZBK0, W5PTL3, A0A096NNB0, G3WIQ1, E1BI77, G3TSC0, M3Y914, E2RBT6, G1N247, G1TBH7, F6TU31, H0WHJ7, G3QD15, K7F9D6, F1RIZ2, Q8NC74, M3VVX4, F7H2L8	Uncharacterized protein	Ensembl
CCDC8	-8.09	UniProtKB	I3NBB1, Q9H0W5, I3LKG1, H9F031, W5PLQ7, A0A0A0MU24, G3RKF9, F6R7X9, H0V8W4, H0WWJ3, E2RQU7, H2NZB5, M3Z6N0, G1SP35, G1QQU4, Q5BIM6, F7EJD7, F6VVQ5, M3WZJ3, H2QGM8, G3U9Z7	Uncharacterized protein	Ensembl
SH2D3A	-7.99	UniProtKB	H2UDW3, F7E224, H2UDW2, G3R969, E2RGR2, H2M052, H2UDW1, H3B5K3, H2UDW0, W5MKA1, G3T5P4, H3CS61, H2NX92, W5MKB4, G1PCL7, A0A096MCM6, G3VPP7, F6VEF9, F6ZEF4, G3PWA0, I3IUJ1, I3IUJ0, H2UDV9, H2UDV8, W5P4T3, G1QHR2, I3M5A9, M4AMF0, A0A087XI43, H2QF57, U3BNP2, F1MID1, G3UFD3, Q9BRG2, I3LSB2, A0A0D9RA42, G3PW94, A0A096LX89, M3WXN8, F6RT49, A0A0A0MW98	Uncharacterized protein	InterPro
LOC102139634	-7.94
NANOS1	-7.93	UniProtKB	U3JHM9, T2M8L4, H0W5S6, W5NNY5, G1MPB2, F6XHE9, K7EX97, H3B5T1, F7H5H3, G1U8J4, A0A096N4U4, F7GJT4, W5NQZ6, V8P9B5, G1Q9I5, H9GQR7, F1Q475, F7GMP3, H2QK22, F1S4P8, Q8WY41, Q5T9H5, R4GMA8, H0XWS4	Uncharacterized protein	InterPro
LOC102120518	-7.86
FUOM	-7.79	UniProtKB	M3WM58, G1P4K1, A2VDF0, H2R786, G3T222, A0A0D9R2T4, G3W9E0, F1N1P7, X6RK00, Q0P563, W6FII9, A0A090FDI5, F6RW33, G3QPW2, G1QNY7, G1L954, F7HIM6, E2RML7, H0W3P3, W5NR88, A0A096NSZ2, F7D4F6, G1SDC8, X6R6T9, F7ESI4, H2N8L1	Fucose mutarotase	InterPro
MAOA	-7.78	UniProtKB	Q5UL78, Q5UL74, Q5UL75, G1NVK8, Q5ULA7, Q5UL76, K7GAQ4, Q5UL77, Q5UL72, F7D3I3, G3SLU5, B8LJQ6, F7C852, Q5ULA2, F1NIY7, K7GP88, Q5ULA3, Q5ULA0, Q49A63, Q5ULA1, F6UIG4, A0A096P0Q6, Q5NU32, H0Z7I8, V8NVZ1, M5CYB2, A0A0A0MXS9, F7AZL4, G7NT17, G1MDG0, K7GN75, G0T5Q7, H0Y171, Q5UL98, Q5UL99, U3JFM8, H0UVA3, H0UVA2, Q5UL90, Q5UL91, M3YMJ9, Q5UL93, G1QPK7, A0A0B2VW87, U3J0T0, G3VU43, K0K8Q4, G3R0P3, M3W…	Uncharacterized protein	Ensembl
LOC102134167	-7.76
FSIP2	-7.73	UniProtKB	F6PR24, M3XWM4, I3N0Q0, A0A096NE14, H0XZC6, J3QTJ6, G3QLA6, M3XFE1, W5Q5C2, H9H7G3, J9NXK6, G1MEN6, E1BH49, H2R6C4, G3WV96, G1SPA9	Uncharacterized protein	Ensembl
KRT17	-7.69	UniProtKB	K7ESE1, F7ANB4, G1SDN2, A0A0D9S2E6, Q04695, M3WGY5, F6Z200, H2QCZ8, F6YK97, G3T7E4, A1L595, H9Z8S1, H9Z8S0, H9Z8S3, K7ESY1, I3MMW4, H9Z8S2, F6YIA9, K7ELP7, G3U2J6, A5A6M0, G3VXT1, A0A096P5N8, U3MXA9, F7CFH1, F7EQB2, G1PGW5, G1RJF9, F7AC93, F1Q0Q9, G1LG77, G3S7E7, G3S675, K7EPJ9, H0Y219, F5GWP8	Uncharacterized protein	Ensembl
RWDD4	-7.66	UniProtKB	Q9CPR1	RWD domain-containing protein 4	MGI
TRIL	-7.66	UniProtKB	G3U6S1, Q7L0X0, I3MTJ5, U3IAZ4, F1N8X5, G1LGN3, K7GB02, G3N181, W5PGZ9, M3Z7B5, G1Q1Q3, M3XCU4, F6WTX8, H0YXM8, U3KJ33, H0W6Z7, G3WBD3, F1PXQ2, G1NE46, H0XVG7, F1SIG2, H9GCB4, G3SFI1	Uncharacterized protein	Ensembl
DSG2	-7.64	UniProtKB	F7IKW9, I3MTC6, U6CNT0, M3ZAN5, H0ZKB1, H0V5C2, H9GPT4, G3S5H2, H0W2T5, F7EP22, J3KSI6, H2NW47, I3M9W6, F1NJD5, K7FAF5, F7IC90, G1R3U9, K7DKT8, F7GWF5, G3R0H5, U3IJF7, H0XG41, F1PGX2, H0W2B5, W5UC12, H0WE29, F1PGX1, F1MFC2, G1SSW0, M3XCS4, G1P0M4, F7BI02, I3L6D7, G1LNG9, W5P8U8, U3CJP8, H2QEE5, A0A096NXU8, Q14126, I3LIM4, U3JTY4, M3Y6C9, G1NDH4, V8PHJ2, F7IKX1, G3UAT3, A0A0D9RZ41, G3VKP0	Uncharacterized protein	Ensembl
KLHDC7A	-7.61	UniProtKB	Q5R866, Q5VTJ3	Kelch domain-containing protein 7A	UniProt
SPTBN2	-7.58	UniProtKB	G1T7I5, E1BMN5, U3BEE4, G3UAP8, F7IBY5, G1NVC1, U3CV24, J9NT02, G3R7Q6, G1LWJ6, H2NCQ0, K7F6C8, F7FT20, F7E4A2, F6W8M4, M3W7N6, H9FYV7, A0A0D9R7N7, G1LWK1, H2R0T4, T2MJI5, E2RSI4, W5PDN3, M3XWH4, G3W0N3, F7HXR9, H0VPB1, O15020, F6ZYR7, U3BXF1, F7HXR3, F6Z5M9, A4QPE4, G1R311, A0A096MRI4, H0XDR8, H9GD14, I3MGZ4, G3SQ62	Uncharacterized protein	InterPro
ACPP	-7.48	UniProtKB	E9PFE6, P15309, H2R438, F1Q4D3, I3N6C9, M3W7V9, A0A096MLX8, F6TQ83, H2PBF8, Q3I1Z5, H2PBF9, Q3I1Z6, F6PL21, Q3I1Z7, Q3I1Z0, Q3I1Z1, Q3I1Z3, G1NG25, F7CWG5, Q3I1Z8, Q3I1Z9, W5PH63, H0V878, F7I0H1, H0XD33, A0A0B2V4F9, G3UIY6, U3BAN4, G3WUE8, F7FVN7, G3WUE9, H3AQL7, Q3I1Y6, F7I0K4, G3SCK1, A6H730, Q3I1Y9, G1NY10, Q3I1Y7, G1QRL0, F1NT31, A0A0C9Q828, A0A061SJK5, F7I0K1, F7GKD7, G3S444, A0A0D9RDS3, A0A…	Acyl carrier protein	InterPro
LOC102130277	-7.45
ITGB4	-7.34	UniProtKB	H0ZDK9, K7FDA9, M3W4M5, I2CYL9, F6VBZ2, F6Y9Y1, Q2VP98, M3YQV9, F1RVY6, W5PJ62, B7ZLD5, B7ZLD8, E6ZGH6, H0WJM6, H2NUQ7, U3BJ48, F7I0A9, E1B864, H9F7A5, F7AXD4, U3IWJ8, K7GPD4, F7BIL4, F7BHQ2, E2RFE1, J3QQL2, G1T8G1, H0VLX6, G1KGA0, A0A024R8T0, G3S7A9, A0A024R8K7, J3QS11, H2QDV9, A0A024R8N2, F7EEF6, G3UG61, G3WZZ0, G3WZZ1, U3BKP0, H9F7F0, U3B147, A0A096NSY2, U3JEA0, A0A0D9QXT3, F7F799, H3AZC6, K7G…	Integrin beta	InterPro
SCAMP5	-7.24	UniProtKB	G1LPV5, H3BNB3, F6VNH3, Q9SXA5, H3BT30, E2RBG0, U3FR83, F6Y0G7, H3BTD1, H9GP03, I3MDG0, Q17QF8, H3BNW6, H3BP89, G1SR99, H2NNT6, H2NNT5, G1PYH8, H3ACF6, W5NXN3, G3SAX4, H0WSF8, M3Z0U5, Q5R5Z8, M3XHF9, F6ZIL5, F1SJ51, K7G3E1, Q8TAC9, H9F139, U3K8G7, E1C052, G3RAF2, U3J5H2, F7AD38, G1RXC9, H2R0C9, A0A0A8K8F5, I0FHI4, H3BNH7, H0VU14, K7G3D1, H3BS22, Q6Z8F5, H0Z0B3, G1RXC1, A0A096NMS6, A0A0D9RPE3, H3B…	Uncharacterized protein	Ensembl
PCDH20	-7.2	UniProtKB	W5KHF6, R0K787, F7HQ41, H2V4B4, Q8N6Y1, G1PDP8, G3PR92, G3X6Y5, M3ZSD3, U3KJ22, W5NMM6, H3CVQ2, A0A087YQ10, D2H481, G3VKI7, H3AR78, F6W1H1, G1TMK1, F1NY34, H2NK06, F6UMF4, F7BU21, V8P634, H0ZQG0, F7FDM2, F6R184, G1S1F2, H9F960, M3XG90, H2LHZ0, W5P883, I3J5C6	Uncharacterized protein	InterPro
SOWAHA	-7.19	UniProtKB	A4FUV2, Q8BLS7	Ankrd43 protein	MGI
DSC2	-7.17	UniProtKB	I0FPP9, U3IDY1, H0V5M4, G1LMW9, G1R412, F7DL11, F7HEK0, A0A0D9RZ05, M3VV56, F7HQ18, G1T3H9, H2NW42, F1NJD7, V8PI32, O77704, J9P6A9, F7HEJ8, A9X9K9, M3Y5R5, G1NDF8, I3LVH8, Q02487, H0X255, F6UVP2, U3BDI2, I2CWK5, F7HQ12, F1PEF1, G1P7N3, G3SDS9, G3SXR9, U6DS68, G3W7D8, H2QEE0, F7HQ07, I3MFH3, G3QTI1, A0A096MSN6, A9X9L1, W5PA25, A9X9L0, W5PA28, P33545, A0A096MZS9, F1MZF2	Uncharacterized protein	InterPro
LOC102117924	-7.12
LOC101926181	-7.11
ANKRD9	-7.1	UniProtKB	F7BIV6, F1N4L2, Q96BM1, H0YM08, H0YNN1, H9G3C4, F1SA09, F6ZAP4, F7GAG8, F6QX28, F6WZB2, H2Q8Y2, F1PGW8	Uncharacterized protein	GO_Central
KRT80	-7.09	UniProtKB	A0A096N617, A0A087Y0I3, F7G4Z2, M3Y8G8, H9H902, G1S7S6, G1S7S5, G3WJ77, G1U8X9, V8PD78, V8NQT4, G3QUP5, Q6KB66, H3BZF1, M3X1L9, G1L4L9, U3J8D6, K7FAF4, F6SLL3, W5K9P8, M3ZXE3, F7A808, E2R2C8, G1NEZ4, A0A0D9R0I0, U3JPW7, H9L3R9, H2R7E1, H2NHC8, A0JND2, W5KHC2, I3MXM9, G3SVC9, A0A096M9R4, G1PIX8, G3NE52, H2QWE4, F6SJH7, H2M2X1, H9KZP7, F6QTA3, U3F9Q6, F7HI84, F6SLM9, H0VDI6, W5Q6V9, H0WYK1	Uncharacterized protein	InterPro
MAP7	-7.07	UniProtKB	W5LGK3, A0A096NQW1, A7E3T9, U3DEX1, H0V2P8, U3IZ11, G1LU17, G3SUA2, K7FFG5, M3YTR1, Q14244, U3E7Y4, F7GZT3, Q5ZIA2, F7GZT1, W5NPZ9, F1PA11, F7GZT5, F6XRF8, F1NYS2, U3KEN3, F7HFK4, H9GNU3, A0A087WZ40, H0ZKR4, A0A0D9RWE3, F6XLI6, H9G1J8, F7DUS6, H2MPX9, G3QF92, G3WD65, G3WD66, G1U0R4, U3F8D6, W5NH65, G1RXS7, H2R6X3, F7GZV8, I3MCQ2, U3BR78, F7G5N2, F7HFC9, U3EZC1, F6ZY38, H2PKE9, H0X152, F7G5M7, M3W…	Ensconsin	InterPro
OAT	-6.99	UniProtKB	F1SDP3, G3U2B8, Q6LFH8, A0A0B7HTS8, C1C1C2, K4HDG4, K4HDG5, Q10G56, Q0G8M0, A0A077XTR9, K4HB76, A0A0B7I1M8, K7FNV9, U6DE53, K7FNV4, P04181, K4HB80, F1Q2A2, K4HB82, H0VGN9, U3J730, Q4XWV5, Q4F9L8, Q4F9L9, Q4F9L6, Q4F9L7, Q5EF77, U3JQB9, G3QEX8, F7BGE6, B5X1S8, F7C9Y5, G1KU46, A0A096NU53, B1A0U3, M3XUH0, D3KZ44, G1T5M0, M3WJK8, Q07805, Q4F9M2, Q4F9M1, Q4F9M0, Q4F9M5, Q4F9M4, Q4F9M3, I3M4E1, A0A034W…	Ornithine aminotransferase, mitochondrial	InterPro
CHAD	-6.97	UniProtKB	W5P2Q0, O15335, M3YVK5, E2QRS3, G3VF00, H2NTN5, U3I924, F1NAT8, G3QUH5, G3T3V1, H0W4E2, I3MHW3, H9F3U7, F1MYE4, A0A096P4I7, H0XRA0, K7FKG1, C6KE16, F1RT93, H9H7R6, F7I5V9, H2QDF2, G1KDT2, G1NA65, H0ZF93, F6WD70, U3JF22, Q27972, D2HMX1, H9EYI2	Uncharacterized protein	Ensembl
PPP1R14A	-6.96	UniProtKB	H0X246, H2NYN1, E1BE60, F6TA78, F6SCU8, F6ZGW6, Q96A00, J9P3B5, F6T9E6, F6TJM9, G3QTH2, F6XFX8, H9G8B8, A0A0A0MVY4, G1Q788, K7AYU7, I0FWJ4, G1TVU9, A0A0B4J2A3, M3Z2C2, G1LVE6, K7EMN0, W5P696, G3UIU2, F6XG02, I3N0F0, M3X951, H0VEG1, G3UM52, G1S4X8, R4G9M6, K7EJB8, A0A0D9QVT4	Uncharacterized protein	InterPro
LOC101866868	-6.94
NIPAL1	-6.9	UniProtKB	D6RIY2, H2ZT54, W6QPQ1, J9NXM0, F7DYY7, H2RHL3, G1NHH7, A0A096MV75, G1S6F0, F7ADN8, F6ZAQ3, H2RGB5, V8P8E4, F7I3E2, W5N279, R4GH30, H2PD89, E1BD04, W5Q5N8, W5Q5P1, G1P9T7, H0Y8W0, H2QPF3, K7FYM6, I3MFT8, Q6NVV3, Q5RDB8, M3Y1T5, U3IS95, U3JKA4, F6WYG7, H0UVK4, G1L916, H9GBN7, G1STH7, H0ZCT6, G3R0V6, M3WKJ3, G3SLY0, G3VD04, H0WS36, A0A0D9RX62	Uncharacterized protein	InterPro
TNRC18	-6.89	UniProtKB	H9GLB3, A0A096NF49, Q5F3E9, A0A096MVG2, C9J9K1, W5NYZ0, A8MTZ4, G1RZX8, F1PWZ6, F6WFW2, H7BXS9, G3R8A3, G1SEG7, U3KHC9, H7C0N9, H0XW68, H9KVB4, F6URG1, H2QUM7, O15417, V8NJN2, F7HUE3, G1MXP6, F7HJR0, H0ZBF1, H3BCJ4, E1BLK1, H7C3U5, I3MRV5, G3SV05, A0A0D9RYK1, G3UPN1, M3YYV5, H7C177, G1LJ30, M3VXL4, K7FV75, K7FV57, J9NYK8, F7EA80, U3IRA7, F7HUE7, J9P0Q6, G3W6K4	Uncharacterized protein	InterPro
PNMA3	-6.88	UniProtKB	I3MUC7, U3FWR7, G3SKM9, U6DU70, M3X6D0, H2RGY5, F7D2F3, F7FSJ4, G1S9L3, F7DX48, A0A0D9S9E0, H2PX42, A0A0A9XQD0, H0XSJ5, Q9UL41	Paraneoplastic antigen Ma3	InterPro
LOC102129184	-6.86
SLC4A11	-6.86	UniProtKB	F7DEF1, H2P1C8, U3JVM2, A0A0B2VBB1, V9GYK6, F7DUT4, H2QJV7, A0A096NV98, G3U576, G3VPJ7, R9UQ67, Q8NBS3, H0UVV3, W5P0J0, F1S8B3, I3M810, H0XJI4, K7D5C9, M3YBT3, H3AR33, E1BUN9, F6Q6Q6, G1NKL9, V9GXZ2, F1MNQ5, G1R7R8, G1SL14, U3B6H7, G1LWX5, W5UIJ0, G3R8E9, U3BR84, F6W0X9, K7E349, R9UNY3, R9UQ62, K7FIZ1, F7DE93, G1NT59, H9G8A5, F1Q0V1, M3WIU0, A0A0D9RLA6, U3I9Z2, H0ZL69	Uncharacterized protein	InterPro
LOC102137992	-6.85
LOC102143040	-6.83
LOC102115022	-6.82
LOC101867457	-6.76
ADRB1	-6.75	UniProtKB	Q28927, P47899, H9GFV4, E1BWY5, G1U1M9, B6ID40, P79148, G1M9N4, W5PWD3, P08588, U3JHS5, G3TTU3, I3N1B5, Q0ZCB3, H3AQ59, B0FL73, F1S5H5, A0A0D9SAV9, H2NBN6, U6DFE7, A7BJV8, G1NEX5, A7BJV9, G1NEX4, B6ID38, B6ID39, A0A096MLL0, G8HJ64, O70430, F7G7G8, T2MH76, P07700, F6WB19, Q4RG75, U3I2J3, F1P8J2, E6ZHB1, K7GCC3, H9FK18, Q9TST6, Q9TT96, B3V8C5, G3SE09, H2Q2L5, Q28998, F7GC16, H0XWT2, G1SBR8	Uncharacterized protein	Ensembl
ATP1A1	-6.74	UniProtKB	Q5TC05, F1MI32, A0A0D9S647, G3URR1, G3WX59, J9SMF4, H9G7K7, H0ZT35, Q5TC01, U5L136, A0A075Q735, P18907, F1NSY1, Q7ZYV1, G1QZ45, P30714, K7GF11, G1LEW1, A0A075QE41, J9NZA9, E1UIY8, Q95M24, A0A0F8DAY7, Q95M23, P05023, P05024, C6GJL2, C6GJL3, G1P3U7, Q13818, U5L0K9, F6QWZ5, G3QV39, V8NZD8, F7E982, A0A023Q242, M1QVN2, G1NNB3, H0WFX1, G1NNB4, I3MQY7, C6GJI9, G3RZN3, C6GJI8, W5QG59, A0A023Q2Z4, G1FFN5,…	ATP1A1	UniProt
ENTPD2	-6.74	UniProtKB	G1MQV5, A0A0D9RV64, G3T6V7, F6WKG7, G3R7S8, H3B8K3, U3BBY6, G3W8C0, P79784, G1MTP8, M3YH71, M3VUP3, G1RCA4, K7G7D4, E2R6F1, I3MG36, W5NQ44, H9G261, H9GMY5, W5UHT4, V8NG79, W5U6A9, A0A096NWP8, F6TJZ5, H2PU20, U3JQG5, Q9Y5L3, H0VVE4, F6XSQ0, G3MZH7, G1M4D5, A7YWN0, F7HD80, F7C527, H0YVT2, F1NGR8, H2R602, U3IBS9, H0WLA0	Uncharacterized protein	Ensembl
LDHD	-6.73	UniProtKB	H0TIG8, G1MRA3, H9EZ43, D3PJH3, Q148K4, A0A096NS06, A0A0D9QUQ2, G3WBP4, H0VGC7, G1L369, U3JYE2, H0Y276, G1SGE9, T2MAQ7, F1P277, F7HRA9, G1PG21, C1BVE3, H2NRH7, F7C7N8, F7E7Z8, G3R505, F1S451, I3M7J4, F7HV72, F7C7N1, H2QBI7, I2CTF8, M3WGH8, F7HT65, F6QED3, U6CXL6, Q86WU2, I3LDY5, G1RRA6, W5U5L0, M3YEX3, E2RSL6, G3SQA4, F7HV82, W5P8U2, A0A0B2VIL8	Uncharacterized protein	InterPro
SLC25A34	-6.72	UniProtKB	G1R7W3, H2PY40, F7DLJ9, W5PGA1, H9GK60, A0A0D9S8H9, G3W0G9, M4AQN6, F1SUU2, A0A096N0F4, G1LZE6, F7GTW8, G3SUE5, F7BDE1, G3RGQ5, A0A087YJ95, G3N877, F7GA64, E2R0Y1, G1Q601, H2MVZ3, U3JLR7, I3MLS4, H0YV15, M3WFD0, H2MVZ5, H2MVZ6, H0VKM4, H0XQJ0, G1N6M6, Q6PIV7, F7DWW2, H3DB00, W5KME2, G1Q7U5, K7GBP6, M3YY13, I3KRQ6, I3KRQ5, H2ZX92, H2TSG4, H2TSG5, Q3SZK0	Uncharacterized protein	UniProt
LOC102115563	-6.69
RASL10B	-6.68	UniProtKB	K7FJB5, E2RPK7, G1M8D6, E1BHS7, I3N5G6, H3BDI3, F7EM54, H0WSX8, F7EUN0, W5L282, U3IG88, G1QKS3, G3RHU5, V8P1L7, H2QCQ0, G1NYT1, W5P898, F6V487, D2HML5, G1MXZ0, U3K526, H2NTD9, F6Z9G3, Q96S79, G3TMI4, H0Z2V8, A0A096P3X9, E1BR34, H0VG62, M3WD65, A0A0D9R1R0, G1SL08, H9GTL5, M3YTZ5	Uncharacterized protein	UniProt
GPRC5C	-6.66	UniProtKB	A0A0D9QWZ8, G1L3G8, A0A096NTR9, G3VJF0, H9F5A6, G3T655, G3QKI5, G1T5C0, M3YS06, Q2YDG0, M3WA52, F7B803, W5PSW8, H2QDS7, F1PLR3, F6X2T0, Q9NQ84, F7GH50, F2Y8C8, H0WBU1, F2Y8C9, F1MRM8, G3VJE9, A8MXZ4, G1KQM1, I3NEF0, H2NUL7, F7C3D6, F6XKR8, F2Y8C3, F2Y8C2, H0WUP3, F2Y8C1, A0A0C4DFY5, F2Y8C0, F6PGF3, F2Y8C7, F2Y8C6, F2Y8C5, F2Y8C4, F2Y8B9, F2Y8B7, F2Y8B8, A0A024R8N9, G3S3D5, F7GH60, U3KE31, G1N3V4,…	G protein-coupled receptor, family C, group 5, member C, isoform CRA_d	UniProt
TFAP2A	-6.6	UniProtKB	G1SNN7, P05549, F8WEX2, H7C4N4, H2PHW6, G1L720, U3I6C6, A5A765, W5Q4G4, F6SSJ9, G3T7D6, H0Z5N0, H7C5E5, F7DL54, C9J6N8, V8NRF3, F1RV96, C9JXZ2, C1K3N0, F1P4X0, G1MWV0, J9NVZ9, H9GEF7, I3N6T8, A0A096NKV4, G1PIC8, G3QX48, H0UT80, F7FSR4, Q96SH1, G1QI47, K7FBS0, A0A0D9R523, U3KFT8, G3VNI5, Q9N0N3, H3A252, F7HQR8, F7G4A7, F7G4A3, M3WGQ5, F6XY47, E6ZIE2, H2Q848, F6XY74, H0WN58, F7FSQ9, F1PFJ9, A1A4R9,…	Uncharacterized protein	Ensembl
LOC102136274	-6.59
LOC102136495	-6.58
TMEM184A	-6.57	UniProtKB	H0WBM4, T2MAI6, Q1RMW2, W5UCF6, U3AP26, R0JUU0, Q6ZMB5, I3NCJ9	Uncharacterized protein	Ensembl
SLC7A4	-6.56	UniProtKB	H0W7D8, M3XX50, F6V927, G1R9A8, O43246, G1NB48, H9GGQ6, G3VX82, W5Q5X8, U3JWK9, H2R731, U3ILH7, C9JM63, F6ULN0, A0A0D9RK44, F7I5F5, H0ZK14, E2RDE7, E1BVL6, F6V916, F7BY43, F7I5E9, H0WCA6, I3MQJ3, M3XBM3, F6W3G6, A0A096NS61, G3QLZ1, K7FS95, F1RK99, G1LBQ6, H3B9P4, F7I807, H0X5H3, H2P515, G1T7Y4, E1BCI3, G3TSL9	Uncharacterized protein	InterPro
MAPK8IP1	-6.51	UniProtKB	M3VZW4, F6QTH7, K7G395, U3FWH3, G1S8K4, H0X773, F1P3Q5, I3MZM7, E1BD27, A0A096N4Z0, T2M3F9, F7DZZ0, F6WL21, F1SHK0, Q6NUQ9, G3RNE6, H2NDL7, G1L1G0, F7HGZ8, U3C263, G1NF12, H2Q3H1, H0ZKC5, E2REQ0, G3U0N4, H9G238, M3Y2T6, H0UVX1, H0W2U8, U3JUL1, G1KQB0, K7EVT5, W5NWY9, Q9UQF2, G1PQP2, G1TJQ0	Uncharacterized protein	Ensembl
LOC101865882	-6.49
C20H16orf89	-6.48
C8H8orf4	-6.47	UniProtKB	H2QW26, F6U5Y9	Uncharacterized protein C8orf4	Ensembl
TMEM42	-6.47	UniProtKB	A0A0A9W2M6, U3EES6, Q2KIX3, H2QMF2, H9F7M9, F6PXS8, Q5R7Q1, K7CG50, K7FVD1, Q69YG0	Transmembrane protein 42	UniProt
CREB3L1	-6.46	UniProtKB	G7NDH4, U3DEF7, H0ZK85, E1BNX4, G1SLS2, E2RLD6, F1SI98, U3JUR0, G1RUS4, Q96BA8, M3WP91, A0A0D9R029, G1PEK4, G3RGQ6, H0VG26, I3MJM9, T2M7G2, F6X7F6, H2Q3H4, E9PK33, G1NEX2, M3Y2P3, J9NXP3, H2NDL3, H0WZB1, K7F9Q8, A0A096N3C5, F6W6B1, G3SVJ0, F6S7D0, G1KCW4, H0YEU7, W5NYZ7, V8PH23, G1LJ96, F7CIH1, G3WR86, U3HZE7	Uncharacterized protein	InterPro
FJX1	-6.46	UniProtKB	W5PKB9, Q86VR8, G3SGW5, I3L5R4, H0XSG3, G1QBL0, G3U4U7, H0W295, F7DKF5, M3XEL3, J9P056, K7F190, G1LMH2, H2RH08, G1KYT7, G3N1N8, F6YHH4, F6Z934	Uncharacterized protein	Ensembl
LOC101866986	-6.46
ADCY9	-6.44	UniProtKB	G3UUI9, W5NY69, G3QEG6, O60503, I3L342, M3WWD4, A0A0D9RBA0, E2R4W4, F1NP57, H2QAH4, H0WKH0, H9GN72, U3BPB9, Q9DGG6, V8PAN3, F7EQQ4, K7FMH6, A0A096NLD9, F6XFB9, T2MHX8, G1P5E9, F6RS83, U6D0R0, W5NY71, H3ADB3, G3UPG2, G1RFC2, U3J6R6, E1BM79, W8B940, W5UAL6, K7CYN2, H0VWH4, V5GE85, A0A034V2L9, H9H2R3, F7D3S1, G3STR6, F7HXI0, U3JP01, H2NPZ9, H9F798, G1SU24, H0Z0I5, A0A0B2V412, J9P935, W8AP51, F6XWK2,…	Adenylate cyclase type 9	UniProt
CLDND2	-6.41	UniProtKB	F6ZFP7, H0UTN2, M3W8Z6, H2NZW0, Q8NHS1, F7BHF2, F7C7N9, G3U801, G3RFQ1, A0A0A0MVL9, F1RP92, A0A0D9S568, F7HU56, H2QH01, E1BNM0, H0WJ45, M3XQM0, D2HYM2	Uncharacterized protein	InterPro
LOC102115168	-6.39
LOC102125714	-6.38
SCNN1A	-6.37	UniProtKB	H2NG78, O46646, C5HTY8, U3JQM9, C5HTY9, F6V9U4, K7GET2, H3AJ42, A0A0A7JY36, A0A0A7JY30, P37088, H0W1Z6, U3JQM7, Q9R1N2, O97741, H0VYY0, H2Q5A1, F6ZIC8, G3SM95, O46653, M3W6M8, F6V9V4, F5GXE6, C5HTZ1, H0W0Y2, G1PPP9, W5MYE1, G3WN71, U3IY79, F1SL28, W5PF45, A0A0A7JT59, V8NGN1, F7ECD2, M3YZP7, Q92075, F1PPX7, A0A0A7JWC0, J9PB48, A0A0A7JTM2, H0X655, A0A0A7JTM6, A0A0A7JWC7, S4RTA3, F7G4F0, O46637, F1N…	Uncharacterized protein	InterPro
LOC102132379	-6.34
LOC102131392	-6.33
NEBL	-6.28	UniProtKB	F7CGT5, G1RQH6, G3TJ07, W5N1C0, U3IDS4, U3JY37, G1PJG9, O76041, F7BZ05, G1KIQ4, H0ZW42, M3YKJ6, M3WE04, G3WXX5, H2N9X7, F7CK56, W5N1C7, H2Q1Q0, F6YZ84, F1NTZ9, A0A096P3N6, K7GHC3, F1RVG6, E2RQ93, G1LHM9, F1PQ88, F1MF57, I3N6X5, H0X9Q1, W5NQM1, U3C6Z0, G1T2V1, A0A096M3I2, G3QRR5, H0YSK0, F7CGV7, M4A0S8	Uncharacterized protein	InterPro
LOC102137475	-6.23
RIPK4	-6.23	UniProtKB	M9ZMB4, M9ZEE3, M9ZHA5, M9ZHA0, M9ZLB9, M9ZFI2, M9ZLB4, M9ZEE8, M9ZKI5, M9ZDA0, M9ZFJ1, K7FFK3, M9ZDA6, M9ZKI0, M9ZHB4, M9ZEF2, M9ZMA6, M9ZHB0, M9ZLA8, Q2TB16, M9ZLA4, M9ZFJ6, M9ZEF7, M9ZLA0, M9ZFK2, M9ZDB1, H0WC26, M9ZDB7, M9ZKJ3, M9ZHB8, M9ZEG1, M9ZMD9, M9ZFG9, M9ZEG6, M9ZFG4, M9ZKK6, F7GQS9, G1KE26, U3JH97, M9ZKK0, M9ZEH1, F6VMY0, M9ZMC7, M9ZEH6, F1SG49, M9ZFH5, M9ZEH9, V8N656, M9ZKL8, M9ZMC0,…	Uncharacterized protein	UniProt
KLF15	-6.21	UniProtKB	H2P9H2, F6PM52, G3T8I4, Q9UIH9, F7FZX6, G1QJY2, H3AZH5, V8PCR5, M3WN65, G1N6L8, W5P9Z3, A0A0D9R6Q7, K7FP15, H9GIS9, I3LNW4, E2QSR2, B4X5Z4, A0A034V1N6, H2QN98, V8P039, H0WH08, A0A034WFP1, G1T3F4, Q009B7, F6S2A9, H3CPK4, E9GGB1, K7AXT7, K7BMI6, H3CPK5, H9H009, U3KDP5, G3R365, R0JK35, M3Z118, G3W062, G7MKM7, U6DQS0, H0ZD01, H9H888, F7CLT3, H9TU38, E1BYR7, G1PFC2, A0A096NFB2, H0V561, D2HL98	Krueppel-like factor 15	InterPro
LOC102125075	-6.2
RCN1	-6.2	UniProtKB	G1LK56, A0A023ZCZ6, A0A0D3UH30, A0A0D3TXJ3, Q59XN3, G3U6I0, A0A0D3TSC2, A0A0D3T3V2, H2Q7I6, G3WX96, A0A0D3U5Y0, A0A0D3TCN6, A0A0C5IL77, A0A0D3T9B4, F6RDV4, C7GT77, A0A0D3UGI5, Q15293, A0A0D3T844, G3T5U4, F6W123, A0A0D3UK74, A0A0D3TNY3, A0A0D3TEM3, A0A0D3U5K7, G1MRX2, A0A0D3T0I4, A0A0D3TBU1, H0WX79, H9EU26, A0A0D3TWN2, A0A0D3UZI0, A0A0D3V5F9, A0A0D3UA78, A0A0D3TN20, A0A0D3U537, A0A0D3TMQ6, V8P9B0,…	Rcn1p	GOC
CNN3	-6.17	UniProtKB	G3VIK8, G3RDC6, J9P766, F6SMT8, F6X6V5, I3MM74, Q9BWY6, G3SRX9, G1RK78, A4H2I3, K7FIF3, F1S543, F7DKH7, F7G309, W5Q7L1, E9PDU6, E1BSX2, G1KD90, G1ME69, F1P9W2, F6T5E2, H2N6Q1, U3JI58, F7DCH4, U3IU67, A0A0D9S6P9, V8NLH8, M3WPY3, C0H9C8, F7IS17, Q32L92, G1N676, G3S2H0, F6U273, M3WLX8, H0V8S4, H0X725, A0A096MP12, Q15417, H0Z5D6, H3A6X5, B5X169, H2PZF7, G1Q1A5, A4H2R6	Calponin	InterPro
ADCY6	-6.16	UniProtKB	U3ED15, G1LL29, A0A034UY33, G3TCT9, Q4RAR2, F7HZQ2, F1Q3J2, K7F477, A0A0D9R1Q2, U3J5D4, H2Q5T6, G1KHZ6, M3YTH9, F7BRW3, U3JBH7, W5U5M2, F6Z453, A0A096N5J8, J9PA45, F1SPN5, G1PH49, G3QIR6, F7H582, G1SSZ0, G3VZA2, W5QD07, H0XG62, P30804, K7DS66, H9EZ76, H1A4C2, O43306, H2NH52, F7HXH2, H9F860, F7HXH5, E1B9K3, U3CGQ8, M3VU21, G1S875, I3M3Q9, F7H578, J9P2M3, U6DEE9	Adenylate cyclase type 6	GOC
TMED3	-6.14	UniProtKB	W5Q045, C1BTG9, G3VUP2, G3R3A7, G3TIE1, I3NHX2, A0A096NMX1, A0A096NMX0, G1M0N3, F6SFJ0, B9EMW9, G3V1J9, U3IEW5, M3WCL0, G1NDJ2, I3LPE7, J9P479, A2VDW4, H2Q9X3, C1BYM3, U3FPT2, M3ZB03, F7FTK2, G1TMR3, C1BHC0, H0ZVL0, F1P3T4, B9ELL3, D3PHJ4, F7FL89, U6DCG0, H3A0P5, F1RKR4, A0A0D9RR93, B9ENS5, F6ZMD4, M3YVG7, G1TJ80, H0X092, Q9Y3Q3, C1BKQ1, U3K8Z5, F7FL73, H2NNZ6, C1BT66, F5H4M7, K7CHR5, G1RC42, H0V…	Uncharacterized protein	Ensembl
LOC102123542	-6.12
LOC101926047	-6.11
LOC102119504	-6.08
GADD45G	-6.06	UniProtKB	Q2KIX1, K7G5P8, M3XBG2, M3YAP5, H9GIM1, F6URS6, H9EZ48, I3MWC3, H0VNM2, W5PD38, U3KPM7, K7GLB1, E2RK27, D3Y270, Q6IAW6, F7GZG4, G3QQR8, G1T546, V8PH71, Q5VZ88, Q5MAI3, G3VNU9, F7G7J2, A0A096P1Y2, O95257, G1PIK6, H2QXF6, G3U115, G1L9R4, H0YQ87, H0WK46, K7GT61, U3JQ91, I0FHD8, K7GKA7, A0A0D9R4L3, H2PSM5, G1QHZ9, F7HV04	Uncharacterized protein	Ensembl
TLCD1	-6.05	UniProtKB	M3W1E9, G3TB77, F6S372, H2RDN0, K7ELX5, G1QRB9, H0UW88, H0Z701, A5D7H0, F1NZP5, F6RZ31, G1PKK7, D2GU24, F7E6X8, M3YRU7, K7FBF0, G3WNY5, W5P0C7, M3XJ99, F6WSW0, F6S1V9, A0A096P3C1, H2NT49, F7EJ17, H2QCJ0, U6DYQ6, A0A0D9R474, Q96CP7, I3M5C4, J9NVQ2, H9F4Q4, G3RKQ3, G1SE78, F7C4S6, H0XPL1, U3JV46	Uncharacterized protein	UniProt
BCL2L2	-6.02	UniProtKB	Q1RMX3, G3WPT2, G3WPT1, M3Y5X5, H0YJC7, Q92843, Q05KI8, G3V5A9, G1RYB4, F7G6M3, Q005V8, G3V3G8, Q45T69, F6PH48, G1Q051, F7IIN0, G3QGF9, G7MX43, H3AAS7, G1TV33, H0XR82, H0VEU9, G3TMU7, Q462R4, A0A0D9RU30, H2Q805, A0A0C9QYM0, G1P3J2, F1S9E4, G1LMC3, G3V4B7, G3V3B7, F6U940	BCL2L2 protein	InterPro
ERBB2	-5.97	UniProtKB	K7GN00, H0ZW67, H9H0G6, F6UJQ9, F7D6W0, F7CBG7, G1QK40, H2QCV1, H9F2X5, F1RWM5, O18735, Q60553, J3KTI5, G3SLF2, W5U6S9, F1MCQ7, X5DNK3, F6WAF2, H9FHS2, H0X3G4, Q2EJ72, M3WCC2, J3QRX1, I0FM22, F1PIQ9, H9L159, F7GML3, K7DJM0, G1PRB8, H3B4Z9, U6DKP6, G1SZL0, F7D6W7, H0V6A0, U3IBS2, A0A060PY73, E0Z5T2, F6W9F1, Q4H1F2, B4DTR1, E2FGA1, J3QLU9, W5PQJ8, K7FH73, F6VNY4, V8PE85, G1LTV6, Q4H1F1, M3XK26, I3M…	ERBB2 protein	InterPro
IRX6	-5.97	UniProtKB	A1YFR5, G3TRZ1, G1QKI4, G3QPB8, E2RP82, E1BPC7, U3JZP4, A2T7C8, A2T6C5, P78412, A2T6C6, H3AQA7, H3AQA8, H0VPA0, F1RF02, A1YGI2, A2D5E3, M3WI30, F7HGW9, M3XW98, G3WC97, A1YF89, G1MDA2, H0XWU2, A1YGI3, G1MDA0, A0A0D9QZ08, F6Z3M5, F7F8E6, F7CUY6, H2NQX1, I3MP67, F7F8E3, G3SBL6, K7FHH7, G1P2G1, A2T7Z7, G1SL09, W5Q9G0, V8NNR1, A0A096NIE9, H2QB40	Uncharacterized protein	InterPro
POF1B	-5.96	UniProtKB	Q8WVV4, Q5RBB5	Protein POF1B	UniProt
LOC102137736	-5.92
LOC102143980	-5.92
FAM126A	-5.91	UniProtKB	G1L9G1, G1S4F1, W5PRJ3, G1NDC3, I3LJX1, H0YWZ1, K7FYX0, E1BFZ6, H0V104, F6YAA0, Q5ZM13, F7INF6, U3IWF7, F7A477, A0A096NGN0, G1SR93, F1NT76, Q9BYI3, M3YQ72, G3T058, H0WKS0, F7DPN7, U3K543, G1KPE4, H2QU91, G3W921, F7CPS5, G1NUA8, M3WEC3, E2QUV5, I3N0F8	Uncharacterized protein	Ensembl
C3H7orf41	-5.89
LOC102134537	-5.89
LOC102143274	-5.89
OCEL1	-5.84	UniProtKB	W5M4P3, M4AHR1, H3AU88, H9H2J6	Uncharacterized protein	InterPro
YBX2	-5.81	UniProtKB	W5UCH6, G1MDR7, G3SBG2, G1R9E5, H0VEV3, G3QWS5, H3CXQ2, F7B439, W5N8T0, H2TYS6, E2RMN5, H2TYS7, A0A096P2N8, F7GKX4, Q9Y2T7, I3MBZ2, H2TYS8, H2TYS9, F6Y5L6, G1MDS1, H9H739, G1P302, H2TYT1, A0A087XN01, G3W0N5, H0WPT4, H2TYT0, H2QC30, G1T8N6, W5PPL7, G3Q6X0, G3TCE9, M3YG54, M3WNQ9, M4AMU7, I3KRX0, G3U7T8, W5KI69, A5D7M4, K7G0H9, A0A0D9RHD7	Uncharacterized protein	InterPro
LOC102124403	-5.8
SLC25A29	-5.76	UniProtKB	V8NRP3, M3XUZ9, G3TK49, M3X4F7, F7B053, A0A0B2V981, U3I6L0, W5NUS0, G3QPV2, A0A0D9RDB6, F1SAP1, E1C3I5, G1QJT2, F7HYS4, H0ZR91, W5NUR9, T2M9Y9, R4GBM7, Q8N8R3, H0XIT2, I3MLA9, F6XY24, A0A0B2V0Z8, J9NSN9, F6ZES9, H2NM90, G1NKS9, G1LXB2, G1SV37, F7IK13, G3V5F4, I2CTF4, F6ZW80, G1PIV6, G3WP44, K7GCV6, H0W9R4, U3JJ50, H2ZW17, Q08DK7, F6XY58, A0A096NJR3, F7HYR9, H2Q8X4	Uncharacterized protein	Ensembl
TMPRSS2	-5.74	UniProtKB	G1TMY8, I3LBF8, Q3I1V5, Q3I1V4, Q3I1V3, U3J988, Q3I1V2, Q3I1V1, Q3I1V0, K7GHS9, A0A0D9R7A1, F1NY88, F6VNA0, G1RBJ7, G3UD10, Q3I1U8, Q3I1U7, Q3I1U9, A0A096NIW2, Q3I1U4, Q3I1U3, Q3I1U6, H2P372, Q3I1U5, Q3I1U0, F6SVR2, Q3I1U2, Q3I1U1, G3QQ80, K7GHR8, I3MJY8, A2VDV7, M3YBM7, E2RJR0, W5PKW5, G1PIF1, M3W8X2, Q3I1T8, Q3I1T9, F7H684, G3SFM5, F7H6E7, G1KE28, G3VR62, U3JHB8, G1LVM0, Q96T73, H2QL19, A7VK02,…	Uncharacterized protein	InterPro
KIAA1244	-5.69	UniProtKB	U3DNT8, E1BZ80, B5MDV5, J9PAY0, H9FXJ4, U3CU22, F1P9Y1	KIAA1244	InterPro
WFDC2	-5.68	UniProtKB	Q14508, M3Z1Q5, G1SXE2, G1LCC2, G1P5X0, G3MX65, G1R4T7, A0A0D9RPJ2, F7HII1, I3MWX4, F7HII7, F7HCE8, F1PDT8, F7HII8, H0V7N5, G3QNH9, W5P7X5, H9F4A5, H0XI70, G1MXE7, Q8MI69, G3VIR2, G3VIR3, H2QKF8, U3HYK9, Q3T0Z0, Q28631, M3WC68, H0X2L1, Q28894, F6QP34, F7FWP7, A8K2M3, F7G8P3, F7HCF1, A0A096NX61, I0FNE6, F7HCJ6	Uncharacterized protein	Ensembl
CCDC160	-5.67	UniProtKB	Q3UYG1	Coiled-coil domain-containing protein 160	MGI
LOC101865646	-5.67
LOC101865654	-5.64
LOC102123004	-5.62
ACSM3	-5.61	UniProtKB	F6XCC9, F1RPB1, A0A0D9R5H6, A0A061QHN8, M3WM24, F7APW8, F7I7Q1, G1RP53, F6Q4I5, F1MES1, F7I5H0, W5PUH2, D2HXR0, G1ND53, F1P6B4, R0LNL5, H3A6E2, G3VNI8, F7DJG6, H0X518, G1SY52, H2QAP6, U6D0Z8, Q5REV5, W5UB22, U3D7R2, H3BUF2, G3QYL2, H9GFI5, G1NCY7, H3BV29, F1NVA1, G1PSZ6, I3M8Z6, T2MCV6, K7G0M4, H3BSM0, A0A096NH85, H0VDH1, Q53FZ2, G3SXM4, H3BVD5, M3YQF6	Acyl-coenzyme A synthetase ACSM3, mitochondrial	InterPro
MARCH6	-5.61	UniProtKB	W5PXD0, G1RLU8, F1NJP9, A0A087ZS66, B3VKM1, A0A096N376, Q0P5L3, G1LAU5, G1SPK3, F6YIQ9, M3YIH9, G1N311, G3SZL8, M3VZS1, K7F2D6, U3FG67, H9ENN5, G1P2F4, H2QQM9, H0ZB76, G3QQG7, F6XBP6, D6RHY7, G3VBF2, G1KB59, F1PED2, E6ZIK2, F6QS80, A0A0D9RXL4, A0A0B2VJ42, U3KNS9, U3J0M2, F6VER5, F6XC98, G3SI83, H0WKG0, H0UTF4, T2MIF6, F1MHF0, H2PF67, G3UN33, Q5R9W1, U3JZD4, O60337, F1S0T7, F7DZU5, V8PBE3	Uncharacterized protein	InterPro
DDR1	-5.6	UniProtKB	Q96T62, F7F0A8, F7BW84, H9ETQ0, A0A0G2JIZ7, F1MCM5, M3YJQ9, F7AYN3, U3JSX4, U3JSX5, H2ZXE7, A0A0A0MSX3, Q5TM72, H2ZXE6, F6Y731, M3WDF8, Q0V8Q0, G3W4S5, H0YAH6, W5PND2, G1MTI3, H0VNP4, E7EPH4, K7FGL7, A0A0G2JI85, Q7YR43, Q0V7M6, E1BBP4, H0XYQ8, F7B0E0, I3MEH2, H0YX36, A0A0A9WV04, H2PIG5, F6R317, A0A024RCL1, G1TBR0, G1PAG8, G1R0K1, G3UQT8, H9ETC9, F7BW66, E7EQ30, H0Y717, J9P5N9, A0A024RCQ1, A2ABM8,…	Discoidin domain receptor family, member 1, isoform CRA_b	Ensembl
EIF4EBP1	-5.59	UniProtKB	G3UHT9, R4G9N2, F6Y074, F6V7K2, G3WXK0, G7MZ42, G3S065, U3J897, F6U109, A0A096ZGR8, H2PQ26, V8P0T4, G1MTL3, K7D2T0, H0XQU6, H9F406, Q13541, T1WFU6, F7FJX5, A0A096NXN8, W5NSM4, H0Z2R5, G1P9F9, M3WD87, G1DG79, G1TEF8, F1PZE3, Q0P5A7, H2R0Z1, I3M8K7, A0A0A1XE80, M3YET7, F7C5U8, H0W870, U3JW88, I3L6D8, E1C115, H3AHA3, G1LX35	Uncharacterized protein	Ensembl
LOC102120780	-5.57
SAA1	-5.56	UniProtKB	U3FFT2, D3DQX7, W5PJE0, P02738, H2R5J3, G1PUB4, P35541, F6ZL17, E9PQD6, P42819, F7ANU9, F7BFU2, F6ZTA7, F6ZH70, F6ZZI4, P0DJI8, P19857, G3QUI8, G1S7R2, P19708, P19707, P20726, P18575, F6V9N7, P53613, P53614	Serum amyloid A protein	InterPro
MAD2L2	-5.54	UniProtKB	F7B5G4, Q4KWZ6, F1PGQ8, G3R1V9, W5NR82, G1N3N6, Q2KIP7, F7GZR5, F7FA96, Q9UI95, G1P7Z1, M3YYA8, F1MSW4, I3MEK0, F6QGE5, M3VU10, G1LT52, G1SJ65, A0A096NY16, H2N940, G3TGM9, F7A0K3, H2PY08, R0LET0, G1REU0, H0W3M3, U3K687, K7GI78, H0X145, H9EQN4, G3W8U2, H0YVT5	Uncharacterized protein	Ensembl
SPINT2	-5.53	UniProtKB	Q6LEU8, H2NYN2, U3D8J6, G1NWU4, F6SYD7, F7D7V2, K7ESI5, H2MM10, H0WP28, U3F2P4, F1RKJ1, F6SYC4, A0A0A0MUB4, O43291, M3XL62, K7EM91, M3X7Y2, F1P984, F7EYR4, G1TCD7, G9KQY4, G3VQ83, F6UFK3, K7EKQ0, K7EJS4, G1LVC5, W6CWM5, W5P6A5, A0A0D9QVT2, G3QZ72, F7BMN5, U3CLB6, F7BAV4, H1A111, I3MMX7, Q2KJ54, K7EKC8, G1S4X5, H0VEG5, K7ALK1	Uncharacterized protein	Ensembl
LOC102132250	-5.5
DDIT4L	-5.47	UniProtKB	F6UJJ8, U3FGR4, Q96D03, A0A0D9QVQ2, K7FQK5, F7EST5, F6X7I9, W5PW90, F7C3Y2, G3TK48, D6RD49, G1TB89, A0A096MRX3, Q5R8K0, H2LKP5, J9P9A5, G3Q818, H2TAI4, V8P6J8, M3X9Z1, M3YDL3, G1RTG4, W5KIG5, G1PES7, H2QPY4, H0VVI3, H0WMR5, H2PDZ6, D6RJ99, H3A5D1, A0A087X2N3, I3K750, H9GIZ9, A2VDT9, I3MF88, F7DKS7, I3LT71, H9F9Z9, M4AWF5, W5MZR0, G1LQ86, G3VJ55, G3VJ56, F6YVX5	Uncharacterized protein	InterPro
LOC102146012	-5.47
SYBU	-5.47	UniProtKB	E9PI48, G3VZ09, Q8R489, H9FWW9, H2QWL2, G1QX08, G3MZF5, F6YA32, G3TP84, E9PRT7, A0A0C4DG86, U3JUE8, F6YA74, H2ZZ62, H2ZZ63, A0A0D9RFW5, U3I573, K7FGW3, H0ZPU5, B5X407, E9PL66, E9PQG2, E9PK96, E9PLB9, F7G9V8, E9PJ11, F7IMS6, G1NIJ3, E9PPS4, F7E0H6, U6DBK3, F6YA82, F7H9H4, G3VZ10, E9PPC2, W5PR07, F1S1H6, B7Z4D2, H0WUG5, G1LHW4, F1NYY3, Q9NX95, H0WBI8, F1Q447, M3XCK1, E9PRH8, G1P4W7, E9PL50, F6SV80,…	Uncharacterized protein	Ensembl
FARP1	-5.44	UniProtKB	K7F5M3, F7H3J1, M0R262, G1KSK9, U3JP83, C9JME2, F7BC88, F6V541, G3QQG8, H3B0J4, H9FNH8, F1MFC6, F6YL31, I3M8A4, M0QXT1, G3SVU5, H2Q7Q9, G1LB95, V8NJW7, Q9Y4F1, F1P065, H0Y783, R4GFM0, F7HNL0, M3YJJ2, R9PXQ2, K7ASQ3, H0ZLF0, G3UQ83, M0QYB0, G1PLH8, H0WWL8, H3B2G8, H0UVL4, A0A0D9RY59, M3WLG1, G1SJ66, F7H3I7, Q5RAB8, E2REU8, F7GEK9, I3LEG0, U3I4X4, G3S889, W5KSI8, G7NJI7, G3U1Z8, U3KNB8, W5NYI9, A0A…	Uncharacterized protein	InterPro
SLC39A8	-5.44	UniProtKB	G3VI77, H0V1W7, U3K093, M4AJB6, G3NML9, W5PUQ1, U3J1Q7, G1NFK7, H3CYW7, A0A0D9QVM1, F1NBL5, A0A096MX81, G1LQK4, G1SL93, H0WYA1, H2ZUD5, F6V4S3, F7DLB3, W5N2M8, H2RH05, S4RVI6, F6RL66, G3QK74, M3YDF2, M3WFU4, F1PPR9, A0A087XS69, Q9C0K1, K7FU27, H2R2F5, F1S103, H9FLR4, H9FBU5, G3SPP1, H2PE03, A0A024RDG0, M3TYX7, I3N627, H9GJ93, H0YZF8, G1PIY1, G1RST6, K7ECE3, E1BQ28, F7F788, F7B861, F6UHS9	Solute carrier family 39 (Zinc transporter), member 8, isoform CRA_b	Ensembl
LOC102128098	-5.43
TUSC1	-5.43	UniProtKB	Q673H1	Tumor suppressor candidate gene 1 protein homolog	MGI
ARHGAP21	-5.42	UniProtKB	M3YL28, G3UCU2, J9P9F1, V8N7J9, F6RFP8, G1LIU6, F1MHG5, I3LDR4, F8W9U9, H2N9Z8, I3LTT6, H0YSE6, H0YSE5, U3C5Q6, A0A0D9RIC1, U3IKS4, H3A6D8, A0A096P3R9, F7FQK9, G1S479, A0A087WW76, M3X065, G1N5H7, H0YSE2, E6ZJC9, F1NS04, F6V5R4, A0A0B8RZR6, G1SI61, H2Q1Q7, K7CIL6, R4GGY3, W5UGK1, G1N5F0, G1KHZ9, G3QV67, F1RVJ3, I3M2K5, W5NYW5, J3JSM9, F7HJW6, F7ITB9, G1LIW9, G3TJB9, H0V3A9, G3WYQ3, F6ZL11, H0Y5T2,…	Rho GTPase-activating protein 21	GO_Central
LOC102126756	-5.38
SLC25A16	-5.38	UniProtKB	H2Q1Z6, H0X4A6, H0YZX1, V8NZ27, F6V662, A0A096P522, G1RMA5, M3UZ90, A0A0A7C014, F7HZD2, G3W8N7, K7GSV7, I3LSN6, G1MYA7, F6S455, A0A0D9R5I1, G1SVD3, H9GG13, H3B219, G3SXN4, R0M8C9, I3M6J8, F7FBH8, G3UFY4, A6QPI5, Q01888, U3KEW6, F1Q3E3, A0A0A9X7C0, V9GZ24, M3YL95, H9ZDV3, P16260, M3WE22, G1MI54, F6SAD8, H0VDM8, A0A096P521, H2NAR1, A0A061RJD1, G3RF07, G3N1N3, A6QPG9, F1NWC1, H9F604, W5P4Y6, G1PRV6,…	Solute carrier family 25 (Mitochondrial carrier protein), member 16	UniProt
GRAMD1C	-5.37	UniProtKB	Q5RC33, Q8IYS0	GRAM domain-containing protein 1C	UniProt
TBC1D16	-5.37	UniProtKB	Q8TBP0	TBC1 domain family member 16	UniProt
C5H4orf19	-5.35
NET1	-5.35	UniProtKB	H2N9N5, T2MB34, Q3ZC77, K7FZU8, H2Q1K3, P47035, I3LJD3, G1PIT3, F6RGP9, G3TSE9, H9FNL5, H9FNL4, K7FZV1, H0VRB0, A0A096P3B5, G3QUZ4, G1T3P9, Q5ZJM0, W5PGH9, A0A096P3B6, H0YUN9, K7D781, H0WMR8, F7ILD7, F6YM83, G3UPP6, G3VK82, G3VK81, H9GPE9, F7ILC8, Q7Z628, G1RKV4, F7ILC9, A0A0D9RMK0, G3TN95, E2RHR9, E0V8D8, F1P7U3, U3KAZ8, M3YY08, F6RZY2, F7HMI5, F7HMI3, W5U8T3, F7HMI9, G1MWQ9, U3IH41, G1L587, G1L…	Uncharacterized protein	InterPro
FAM210B	-5.31	UniProtKB	Q96KR6, I2CUK4	Transmembrane protein C20orf108	UniProt
LOC101925332	-5.31
LOC102141581	-5.31
SLPI	-5.3	UniProtKB	F7GA75, I3N3E6, A4K2U5, P22298, Q6LDI0, W5P4H2, A0A060KPV3, A4K2Q2, G1R4L7, A4K2S7, I3LLM4, A4K2R9, A0A0D9RPB0, A4K2Y0, Q6V9X0, C3KJ94, G3T6I3, F6V822, G1U9F5, A4K2P4, H0WSL0, A4K2N0, H2RB94, G1LBZ7, M3Z1R4, A4K2Y8, C3KJP9, A4K2V7, A4K2X1, H0W7Q4, A4K2T7, A4K2R0, U6CRY7, K7C067, B9EL08, P03973, M3WC63, G3VKP6, R4G9K0, F6R9W4	SLPI	InterPro
GOT1	-5.28	UniProtKB	A0A0D3WDH2, A0A0D3YIB0, A6P3C1, A0A0D3WD10, K7FDQ4, A0A0D3WK05, A0A0D3VWR8, A0A0D3WMG1, H3B1T1, A0A0D3VIK6, A0A0C4FSQ6, A0A0D3YQM5, A0A0D3Y3C3, A0A0D3WWN3, A0A0D3X9M6, F2QNZ2, A0A0D3X259, A0A0D3XZJ0, A0A0D3WR20, F1NTM7, A0A0D3WH77, I3M9X1, A0A0D3YJG1, P33097, A0A0D3VJT6, A0A0D3VX96, A0A0D3X8G1, A0A0D3XTI7, F7GSG3, A0A0D3W7B0, M3YZY0, A3LNQ9, G3WLZ6, A5A6K8, A0A0D3YNF6, A0A0D3XYG2, A0A0D3Y5H9, H2Q…	Got1p	InterPro
LOC102128428	-5.28
TRIM29	-5.27	UniProtKB	M3W068, I3LZJ1, A0A096MEN8, F1S9T4, K7E3T3, I3JRP9, G3QHS5, G1MTY2, H0V6R8, W5LPZ1, A0A087XCZ7, U3KMB0, H3C080, F6T7Z5, E2RQK1, Q14134, A0A024R3J1, H0XT86, G3TMM1, E1C030, H0YQ61, V8NUM7, G3NLT6, H2Q4Y9, G3X256, E1BEZ4, G3X257, G1U5D6, A0A096NPC2, F6SNZ2, H2U4S4, H2U4S5, H2U4S2, H2U4S3, G1LMZ0, F6ZTI2, A0A0D9S3X1, H2L6A7, S4R519, M3Y2I4, H2U4S0, H2U4S1, G1R752, Q0P6H7, F6ZLN6, F6SNY6, H2U4R9, F7I…	Tripartite motif-containing 29, isoform CRA_a	Ensembl
PDCD4	-5.26	UniProtKB	U3I5Y3, G1NEE5, H2NBK9, Q98TX3, G1MAZ4, U3JHX1, H2Q2K3, M3XSJ4, A4IFD1, G3WFA5, H0X795, G1KRL9, H3AZL1, M3WFY9, G1TCG0, F7HGG8, F7I3G5, F1NIY3, G3S1V1, Q5R8S3, F1S5L7, H0VB92, Q5VZS7, W5PL70, F6V2H7, F7AUR7, G1S084, G3U1P9, Q53EL6, E2R334, A0A096N5I7, I3MQ25, K7FSZ2, K6ZK16, G1PNM3	Uncharacterized protein	Ensembl
UACA	-5.24	UniProtKB	G1RTL1, H3CVZ1, I3N7V4, H0VBM3, Q9GL21, Q8HYY4, G1PFL9, G1T658, K7CTP5, A0A0D9RMI5, B7ZKM6, G3TRF7, F7EFH8, U3JRH9, W5N9I0, B7ZKM7, I2CXA3, W5QBM2, W5QBM6, H9GL32, F5H2B9, M3ZDU1, M3Z071, U3EA20, H0YNH8, H2Q9Q2, F7IFE4, G3RDH4, A0A096NMK4, H3BZM7, F6YJC7, M3VWI2, G1NDB5, U3I8N8, G3TC06, H0YMI1, T1W3N3, W5KFE5, H3DQV9, U3BEF3, F7I8C5, A0A096MH29, G1LQU2, G3PXJ8, A0A087XNT2, G3TRP2, F7ID14, U3C7I5,…	Uncharacterized protein	InterPro
KCTD14	-5.23	UniProtKB	M3ZAW3, H9GCA7, H0W955, W5UF81, M3Y950, H2Q4G9, F1NVR9, G1U5F3, H2ZZM4, F7F1R8, A0A087WUM3, W5Q109, H2NES0, F1MDD6, U3I1T9, K7F025, M3W7R5, F7ABY2, F6SQT0, J9NXU8, A0A0D9QUY4, W5L2I8, G1MNJ3, H0Y1Y8, G3WHK8, G1NQS6, G1PQE9, U3JYV5, F7GGM9, G3TIV0, W5MHA4, F1PAJ8, A0A087Y7B1, G3PJA7, A0A087WY27, I3LB81, M3ZR92, A0A096MN05, G3RCI8, H0ZS10, Q9BQ13	BTB/POZ domain-containing protein KCTD14	InterPro
MLPH	-5.23	UniProtKB	S4S328, S4S327, A0SJ36, F7G228, K7BS80, F1MS63, A2VDU9, H3AUF2, G3RGG7, G3URA6, U3KE86, H0XD35, Q53QF3, H9EYP9, F6SHY5, U3IBW0, V8P8C4, M3WHG5, C9JI01, G1KCW1, G1TBR4, G3USD7, I3MYR8, W0FIT6, K7BY93, K7GGV3, A0A024R492, G3W6N2, R4GGI3, F6R7Q7, A0A0D9R1E6, F7DBC4, A5A781, G1LP99, C1IC57, W5QCL2, C1IC56, G1NTB0, G3W6N3, V6A751, H0Z004, F7EXT3, H2P918, M3XCM0, C0ITK4, C0ITK3, C0ITK6, C0ITK5, C0ITK8,…	Melanophilin, isoform CRA_c	GOC
OVOL2	-5.23	UniProtKB	K7EVC2, G3T5X6, U3J9A7, M3WQ58, G1N4N1, G1T2M5, W5QA35, H2P139, G3X2A6, G3X2A5, F7GFR3, G1LF81, H2QK02, F6XG71, G1Q7R4, Q9BRP0, G3SJH9, I2CYC8, F7IDA4, G3RUU7, E1BWL6, F7IDA5, G3MYZ0, A0A096NVN1, E1BDB8, F7BX67, G1RF57, J9P3A0, H0XP46, I3N0X6, H9F366, U6DQF5, H0VB57, K7FH34, F7GFQ5, U3JYS2, G3U5L9, W5KF60, E2RC49, A0A0D9RGK9, H3ASZ8, H0Z671, G1KPM6, V8NCN2, M3XQD4	Uncharacterized protein	InterPro
LOC102124736	-5.2
OCLN	-5.19	UniProtKB	W5UIU0, H9FGN3, K7G8Z6, A0A096N8G9, M3W874, H9F450, K7G8Z0, I3NBV6, Q16625, G1SMW6, H2PFS3, E2JDR2, A0A023SFK3, H0V697, E2JDR3, G1QW88, A0A0E3DBX9, A0A0G2JPF2, J9P475, F7C3D2, H2PFS2, V8P7M2, A2VE81, I3LGZ9, A0A023SEG5, Q91049, A0A0D9RT63, G1KWJ7, H2RAY7, C1KBJ1, F6SYJ0, F7EJX1, Q5RFS5, U3I689, A0A023SCW9, G1PAG7, U6CRG2, U3K3B2, F7INV8, G3SUZ0, H9FL64, W8SNN8, Q28269, A0A023SDH4, W8T1G4, F7HLI9,…	Occludin	InterPro
LOC101866414	-5.17
SNTA1	-5.16	UniProtKB	W5K043, F6PP33, U3F9T2, G1RG04, H0XZ60, F6UMH5, K7FLE1, G1KHX2, R4GFN2, F6WYV2, F1S4Z9, H2U2L9, H0XR08, Q13424, H0Z028, A0A087XB56, M3X3N6, G1M2Y8, G3RXR0, H2QK69, H3CNK0, M3ZUN9, U3ITK4, Q28626, A0A096NUV2, M3Z2A9, G1MTQ7, A0A0D9RIP0, W5U756, G3QZK5, E6ZF54, Q0P5E6, H2P1N7, G3NRT0, B3KTR0, U3JTK5, I3JI75, U6D5X3, U3JTK4, Q29RY0, G1P581, V8PAD3, S4RDF2, E2RIV7, U3EU55, G3WR17, G1T281, W5PD91, H0V…	Uncharacterized protein	InterPro
EMP2	-5.15	UniProtKB	W5P6Z5, H0Z2Z6, B5XAN5, G1TSY3, H0WAW1, A0A0D9R821, G3TM91, G3RCK5, H9GLB9, H2NQ39, P54851, K7F6C9, F6THT0, F7I0U4, G3W8L5, G1QFS7, G3W8L4, K7CMK1, A0A096NLN2, M3YTC2, C1C4V9, E2R084, U3I893, C1BI46, F6XU02, W5UL87, U3JMY3, A5A6N6, R4GJA9, G1M8K6, M3XA25, V8N4A7, G1N8I8, F6YYQ3, C1BW29, E3TE30, W5UJT9, G1RGI6, Q2NKU9, F7BZ57, F7GGN5, U6D2Y6, I3N1E8, F1MW04, F1RL09	Uncharacterized protein	Ensembl
LIPH	-5.14	UniProtKB	U3DAG4, U6CR34, C0HAV5, I0FPU0, F1PG57, M3W3Y5, H7C2X1, U3IBL7, F7AM73, F1MXA8, I3MGY6, G1MTX9, G1MEH3, W5QH96, W5QH97, G1P353, M3XVD9, A0A034WS67, A2IBA8, A0A034WKV9, H7BZL3, Q9BDJ4, V5GZ96, A0A034W2N9, G3TIB0, A0A034WDD3, Q8WWY8, W8BX23, F6Z6X9, A0A023I9D0, W8C7N6, A0A0D9RNF2, A2IBA6, G1R3W4, F8UV40, H0VPM0, H0Z994, A0A034WU54, A0A096MSG1, H0XKQ0, H2PC84, G0YYC6, A0A034WEQ9, G3RCI7, K7GJB0, F1S…	Lipase member H	UniProt
CLDN10	-5.13	UniProtKB	A0A0A0MXT3, G1KA53, M3WRI4, E1C926, G3WN16, D2H9Z6, Q5R8E5, F6ZXB6, U3JPG3, F6ZXC4, K7F2D3, V8P8G7, W5UMD8, G1S3S7, F7DB74, A0A096MND5, G3SE82, H0WPY3, E2RBC2, W5UG79, Q5W075, H0ZLP5, Q5E9L0, G3U1I3, F6SEC7, U3IXJ4, M3YK55, H9F8I2, G1SX77, H2Q7Q2, A0A0D9RY67, H3A6J8, F1RP52, F7FY51, V8P6X8, G3T285, I3MEW8, W5NVE8, H0V1R7, W5UEV7, P78369, A0A0A0MXN8, G1Q1L5	Claudin	InterPro
LOC102123289	-5.13
LOC102127837	-5.08
OPLAH	-5.07	UniProtKB	W5MQY2, K7DSB9, I3M0R6, A0A061QK51, H3CRU1, G3RIV3, G3S2I5, A0A0B2UTU5, K7C5X5, O14841, G3ULY7, A0A090EM24, V8N4Q0, F6PQ71, Q7UG95, H2PRF3, W5Q173, F6XQF8, F7HJP8, W5L3K8, A0A090EMV1, S4R7X5, T2MIN7, A7E261, M5ESB9, E6ZIJ0, F6YTL4, G3TRV8, G3NDC6, M3Y7A2, U3DXX1, G4SXZ4, A0A090EFM3, K6ZMR9, U3FN58, M1ZEP2, G1PRM8, A0A090G8N8, F6WVB6, A0A096P3I2, G1LHS6, G3VND4, A0A090DTW1, U3FA38, H2R0H4, H0XGE7,…	5-oxoprolinase	InterPro
THEM6	-5.06	UniProtKB	Q8WUY1, A6H707	Protein THEM6	UniProt
AGR2	-5.04	UniProtKB	F7FAI5, O95994, U3K5P2, F7EM58, F6ZUT4, H2QU78, F1N3J3, H0UT00, U3IM46, F1PUR5, F6YDJ9, Q4JM46, G1NCN7, G1S3H5, H0YWH6, M3YRB6, G3RAR5, Q5R7P1, M3W415, E1C937, I3LLU1, G3SX81, H0WWK0, I3MCE0, G1SJZ5, F1SEI7, W5PGR9, F7HNR1, A0A096NFQ0, G3VGV8, G1LVJ0	Uncharacterized protein	Ensembl
LOC101866723	-5.04
CLCNKB	-5.03	UniProtKB	F7CUG5, U3JKQ5, I0FP42, P51801, A0A0D9S8H1, A0A096N9Q7, E1BS59, H2N8Y0, A0A096N210, Q8WW53, F6ZPL4, F7E0F8, A0A087X136, F7E0E4, H3AH33, P51804, H2PY45, F7CUI7, F6UHN1, F7H9U8	Chloride channel protein ClC-Kb	InterPro
METTL21B	-5.03	UniProtKB	F7I1A2, K7CTC3, G1KN74, H2NHV4, F7HED9, G1S5T7, M3XSH7, F1PBM5, I0FL35, F1PBM6, A4FV98, D2H325, F6UKF7, H0VJB1, Q96AZ1, K7GC82, A0A096NYT3, H2Q6C6, H9H7Z2, F6QE86, G1P5W5, W5P555, I3NGV1, H0XMV1, I3LNJ7, F7FZB0, G1T3G2, G3QGE0, M3WTK1, G3UE01	Uncharacterized protein	Ensembl
LOC102131242	-5.01
PKDCC	-5.01	UniProtKB	U3IZV7, G1SIT7, U6DQL3, F1S4U8, W5NI93, H0VS76, H2QHT1, H0YYV0, F7GQT5, J9NXG6, F6VUE3, F7DV59, F1NEA9, F7CBQ3, M3VZS6, U3E4B9, W5L943, V8NNW1, H9F4Z0, G1NCB4, I3LVV1, G1LEY0, H0WMV2, G1S3U1, M3YBT2, F8WB71, E2QUX6, G1PG92, U3KDR0, W5U681, Q504Y2, H9FME7, G3RDU8, E1B9H4, W5PCQ6, H3B7Q7, G1KI67, G3WKS3, F6UB77, A0A096MVF2, H2P6E7, A0A0D9RJ71, G3TT31, K7FI30, H9FDT5	Uncharacterized protein	Ensembl
LOC102123020	-5
DEPTOR	-4.98	UniProtKB	I3MLT3, G1NIV8, K7FNY2, F1S284, T2M9H2, A0A096MUT4, M3XPR5, J9NYP8, H9GEN8, H2QWM8, W5Q4C9, F1NAC5, H2PR36, G3TAF2, G3X0E6, H3AVV3, Q8TB45, G3X0E7, F6S6A9, U3JI78, M3WE84, H0ZQ63, G1L5X3, F7CBP3, F1PSR7, G1PE50, K7FNX6, F6VQP8, F7BDN2, K7GMD4, F6XWT5, H0VNU9, R0JLU6, K7GMV6, H0XAW0, G3QP24, F6RLE1, G1QYR3, A0A0D9RED8, G1STH6, F7D506, F7BCX8, F7HQH4	Uncharacterized protein	Ensembl
SOAT1	-4.98	UniProtKB	H2Q0P3, A0A096MXS6, M3Y1H4, I3L5S1, Q3T0N9, A0A0D9RI50, G3T026, Q60457, F7FD82, O77761, M3W8J8, O77760, W8AZZ4, G3S4J8, U3IZ14, F7AU50, W5Q5C8, G3S252, H1A453, G1M7X8, W8B729, G1MUM5, H2N4J3, A0A034WRY4, U6CSS0, G1S0H8, H3AS23, I3MIK3, F7FU54, H0VN47, F7FTK9, W8BYT6, F7EI03, G1PUR1, A0A034WBI5, F7GXC5, H0X617, G1SUQ0, I0FUG4, F7BXC0, U3K0G8, R4GBR0, V8NWX8, F6YHF4, P35610, F1PUL0, G3VL98, E1BTG6,…	O-acyltransferase	UniProt
TMEM99	-4.97	UniProtKB	A0A024R1X7, Q8N816	Transmembrane protein 99, isoform CRA_a	UniProt
LOC102135189	-4.95
OGFRL1	-4.93	UniProtKB	H3A7G8, G1P906, Q5TC84, V8NJQ8, F7DLK9, A0A0D9RN44, G1TS07, F7G273, J9P2Y6, F1N3J9, U3IWU5, H0XJY3, G1KHY1, G3UEA8, G3R586, U3EEX7, A0A096NQE5, H2QTA0, H9EX05, K7DSB2, H0ZR44, F7E4L9, H0VZ46, F1RTS8, G3SVV0, U3EN69, G1LDY5, F1P5M6, F7FLT3, G1QJR3, G3WV33, U3JWZ0, G3WV34, U3DUD1, A0A0B8RSH2, W5PNH1, I3MGE4, F7HBA9, G1NM53, M3Y4E7, H2PJJ6, K7F2K1	Uncharacterized protein	InterPro
RNF128	-4.93	UniProtKB	E2RG93, F7IST3, F6T2N2, G3SR73, F7GDL3, G3W0K0, H0UX78, H0Z1Z2, M3XL43, R4GLX3, K7GMW3, M3X6N6, F7FR07, F7HCE5, A0A096MNP6, F7EJ34, U3J3L0, Q29RU0, H9FIW1, F7EJ30, A0A0D9RA85, F1RXM2, A0A0F8DEV8, W5QC69, Q5RF74, I3NG04, D2HJV3, M3XX65, H9F5I8, U3JJH9, G1PAA6, F6Z492, Q8TEB7, K7C559, G1T331, H9FHD4, H3BAG7, F1MCR4, H0X7Y3, G1RU06, H2R4M0, G1RU08, F7EJ25	Uncharacterized protein	Ensembl
DHRS4	-4.91	UniProtKB	F6R289, A0A061QFE1, G1TRJ1, H9F5A8, A0A0B2VQ43, A0A0B2VVD0, Q9BTZ2, H2NKT8, C1BKG8, B5X9J3, I0FII7, H2R3L5, F6QUD5, F7EI31, F7GUE6, Q5RCF8, T2M6U9, F7FMA7, U6DF22, F5GWZ1, F7B549, Q9GKX2, F7FAH7, W8C3I0, F7HT02, C3KGX5, F1PCI3, A0A034VBJ0, E3TDS7, F7EA09, A0A0D9RTP9, F7EA04, A0A088AAD0, A0A0A1XNH2, A0A0B2VP39, K7CP50, F1MZD5, A0A0C9R382, C1BT86, M3X301, F6SVV0, Q8WNV7, Q8SPU8, G1MDT3	Dehydrogenase/reductase SDR family member 4	InterPro
PRRG2	-4.91	UniProtKB	E2R5G1, A0A0D9S3V7, M0QXL9, A0A0A0MVJ7, G3QH64, Q3T0N4, F7BM84, F7GWB4, G3VPL4, G3RSK2, M3WDD6, G3TQW1, F6VE57, Q8TAS3, F7GW38, W5PUR6, H2QGV6, F6ZSU8, I3MML6, F7GWA2, H0VBG2, O14669, M3XTZ8, G1M5U0, H0XWV4, G1PW24, F1RIN2, H2NZN8	Uncharacterized protein	InterPro
LOC101925503	-4.89
GALNT4	-4.85	UniProtKB	Q8N4A0, R0JK66, U3BW57, G1MJM4, A7YY74, M3XBK7, K7DQZ0, H2ZWN5, F7C5M1, U3KK81, H9G186, F6TX55, G1NRH7	Polypeptide N-acetylgalactosaminyltransferase	UniProt
DIRAS3	-4.84	UniProtKB	F7GHS1, H0WNC2, H2PZ75, A0A0D9SAF2, W5PK81, M9NH37, G3UFL3, Q15B95, G1PKT4, I3NBW8, M3XP00, Q3ZBQ6, G1U8U1, G3QUL7, F6XJY3, G1RDI5, O95661, H2N735	Uncharacterized protein	UniProt
LOC101925108	-4.83
LRRC8E	-4.83	UniProtKB	Q6NSJ5	Volume-regulated anion channel subunit LRRC8E	UniProt
REEP6	-4.83	UniProtKB	W5PR68, G2HEM8, H9EZQ1, K7F406, Q32LG5, F7AT74, G1MYI3, M3Y9Q5, D3PIU6, U3IUM0, A0A0A0MTX5, F6UL41, G1P0V9, U6DP75, I3LNY0, U3KHY1, A8MWX0, F1NTI5, M3XHC7, H3AGB7, F1PEU7, H3AGB8, U3CYW3, H0WG06, H0YRG6, M3X108, H0W2S4, G3WHA6, Q96HR9, I0FWF5, A8MXN1, I3M9B8	Receptor expression-enhancing protein	Ensembl
LOC101866458	-4.82
LOC102129052	-4.81
HAGHL	-4.79	UniProtKB	E1BNT6, F7DFG1, A0A0D9RIF4, A0A096M754, A0A087XU74, H2SP52, I3M3R1, M3XAY3, W8BK60, Q0VBY3, E2R0I5, B4DED4, I3KKQ7, F7G5Y2, W5MCT8, K7G4Y3, U3JKU9, W5PWA4, W5MCW0, E3TF40, K7D2C8, Q6PII5, M4AKR8, W5MCR8, K7GN34, H9G0N3, A0A096NKJ4, G3WE83, A0A034VV98, W5PWA3, M5FKE2, H2NPM1, M3YWV1, G3S5A2, Q5ZLY2, F1RG49, F7HDS9	Hydroxyacylglutathione hydrolase-like protein	InterPro
CTSF	-4.78	UniProtKB	G3W411, G3W410, I3ME67, F6QQU8, E2RR02, F7IL49, Q0Q4H0, Q30DV4, M3XWE6, H0YD65, U3E7F4, G1LWU5, H9EYQ5, G1R2S4, A0A024R5G9, W5PBB5, K7F4C8, F6YUR2, F7FV49, F7IIX5, F1RU48, H2Q471, B3LDT1, G1NU94, B3LDT0, Q6FHS1, G1T5Y9, H0WLC6, G3TFX4, A0A096MZF1, M3W7M8, E9PSC2, Q5ZPJ6, H0UZX3, A0A0D9R7K9, Q0VCU3, Q9UBX1, H2NCQ9, G3RIV1, U3EVC0, H0YE42, F7HER0, U3EDA6	Cathepsin F, isoform CRA_a	InterPro
PDK4	-4.76	UniProtKB	F7C3G9, A0A096NGM5, F2QML9, A4D1H4, C6FE30, G1S170, A0A0D3L413, H0WYJ7, H9F8D5, A0A0D3L410, F6VVZ8, I3N4Y9, A0A0D3L415, F7FDH5, A0A0D3L419, A0A0D3L418, U6DV75, A0A0D3L3Y5, A0A0D3L3Y9, F7GY25, H9H6X8, R1DE73, I0IVB4, H0VQK9, G3QJ46, A0A0D3L421, K7GJ49, W5NZZ4, C6FE29, G3VJI9, A0A0D3L3Y4, H0YTM4, C1IHT9, G1P8D7, Q1KMR4, F6K447, Q16654, A0A0D3L3Z6, A0A0D3L3Z7, A0A0D3L3Z9, O88345, A0T2S7, U3J7U7, A0A…	Uncharacterized protein	Ensembl
LOC102123374	-4.75
MFAP2	-4.75	UniProtKB	W5PPK4, M3WVF4, F1Q2F5, H3B742, F7BS81, H0W668, G3UM39, G3W3C0, H0WRD2, G1L0V0, R4GIB6, F7I4B1, B5X753, B9EL91, G7MH52, G1NSD0, F1SUS0, A0A024RA94, H1A230, A0A0D9S8G0, U3JL58, K7C8W8, A0A096MNW5, I3MLL3, B5XDB1, U3J497, G3RLX9, H2N8W4, K7FYG0, C1BM26, K7BCI4, P27424, M3YXV6, F6YGP7, F6VPC9, P55001, G3RJF4, G1RS32, H2PY54, F1MWK6	Microfibrillar-associated protein 2, isoform CRA_d	InterPro
ALDH1L1	-4.74	UniProtKB	G1LIH3, E1BMG9, M3VX94, G3W850, F6PMU7, F2Z324, I3LEN7, C9JY00, G1LIH5, W5P8S8, A7YY67, C9JYZ6, F6UL10, G1PEG3, H3B2E7, H0V7T5, G1QJX5, H9H007, F6PXK1, H0WPU7, C9IZ36, F6SJR3, F6UZU4, Q5RFM9, A0A0D9R6P2, G1T8P1, G3TF95, G3QQ24, F1PD65, F7EHJ1, D6RFJ7, F8WC34, M3XUM1, I3N7R9, H2P9H5, F6PMB9, F7HB04, F7HFX3, O75891, A0A096N9E1, F7H594	Uncharacterized protein	InterPro
LOC102130587	-4.74
CHCHD10	-4.72	UniProtKB	U3KJ69, M3XVF3, H0XKL2, A0A096NTK5, H2P3S7, F6SQW4, F1RL20, A4IF72, G1QI51, W5PUB0, E2RJF9, G1P3L1, G3VNT7, M3W1H6, R4GKF0, G3R113, H9GNI5, G1TP23, Q8WYQ3, G3U4G3, H0VRF4, G1M4U9	Uncharacterized protein	Ensembl
LOC101864785	-4.72
LOC101867052	-4.71
LOC101867187	-4.7
ACSL1	-4.68	UniProtKB	Q0VCZ8, G7MSE1, A0A0B2VMG2, H0Y9U7, G1SPB6, F6Q065, V8NA46, F6SAH3, G3R3B2, H0WJ55, A0A0B2V929, C0H973, H2QQI4, F1RSZ3, A0A0B2V6H5, Q5F420, G3W0W9, M3W3F8, G3SZX1, F6PR82, Q9JID6, F7C1E6, G3TTV8, G1KB02, F6SMD6, A0A0D9S2F9, H0Z8N1, U3KBD1, D0VY16, K7GCL6, G1P6T6, G1RJV9, H9FR72, Q108N1, U3IU30, K7CN88, P33121, Q108N2, F7HTT3, E7EPM6, W5PCL4, K7GCK7, E2D780, D6RER0, I3MCT6, E2QUL3, A0A097P9M4, A0A…	Long-chain-fatty-acid--CoA ligase 1	InterPro
DVL1	-4.68	UniProtKB	A0A087WWA7, M3YSD6, E2QY91, U3F141, H0V8R1, F7G276, G3VVC2, H9KW68, H9F6E0, F6TIV6, F7DYF0, Q5F487, H9Z605, W5L1J8, F1RJE5, M3W823, A0A0D9S8Y3, K7E8E9, Q5IS48, Q86TH3, G1MVF0, K7F4Z3, O14640, U6DKC5, K7F4Z5, H0YY89, A0A024R080, A0A096N0D9, U3K3S6, G3QRM7, K7ANK8, A8KC70, W5P1N2, U3FY79, U3ES17, U3IF56, H2N9H9, F1N6M9, H9GKC5, Q6PJD6, I3MK86, H3BHQ1, H2RBE2, G1QGK4, H0XYS7, H3D4S3, G3UIG3, K7CTR2,…	Dishevelled, dsh homolog 1 (Drosophila), isoform CRA_a	GOC
ESRRG	-4.68	UniProtKB	F6QHL4, F6QPZ5, G3WA42, F1SA88, H2R2K0, M3XCZ0, P62508, K7FDF3, H0XBZ1, U3ICB1, G3SZB9, G1RVM3, G1NAZ5, F7AMC1, J9NWD9, F6T8Y5, A0A096NEC2, E2R7U1, A0A0D9RT24, G1KEF6, I3MDN3, G3R425, Q5UKY7, H9FAD1, F6R995, Q5RAM2, G3R430, G1P3R9, K7FDG5, H2N3Q0, U3KCN2, F6QI06, E1BC39, H0YXC7, V8N6G3, C9JU32, F7IGB3, G3TQM6, H0VBZ8, M3XYV0, F7HEF6, G1L390, G1SEH2, W5PNX1	Uncharacterized protein	Ensembl
FGFR2	-4.67	UniProtKB	Q95KV2, S4R381, F1PPH0, A7E310, F1NEE9, H0ZLZ4, U3CL89, H0X6E4, Q95KU8, K7GLJ1, Q95JB7, R4GC14, U3BNX8, U3BMC6, Q9TTZ3, A5A754, Q80YG0, K7GPH9, Q91147, Q91286, G3T3F1, Q9R294, Q9R293, B5A963, F7C9J5, D2CGD1, B5A960, B5A962, B5A961, K7GQY0, U3D863, M3XV59, P21802, S4R3B2, V5GL95, A0A0D9QXC2, K7EG82, L0N326, U3JHI1, D3DRE0, Q9BDL9, G1LX76, F1MNW2, H2NBT5, U3D1T7, D5FGJ3, D5FGJ4, G3UN36, F7A5W0, V8N…	Receptor protein-tyrosine kinase	UniProt
C14H11orf52	-4.66	UniProtKB	F6ZPV5	Uncharacterized protein	Ensembl
SOWAHB	-4.65	UniProtKB	Q8BZW2	Ankyrin repeat domain-containing protein SOWAHB	MGI
LOC102136041	-4.64
SCHIP1	-4.62	UniProtKB	Q9P0W5, M3XCL0, G3TKW4, H2R7Y7, F6SPL6	Uncharacterized protein	Ensembl
CAV2	-4.6	UniProtKB	Q108U8, Q2QLG7, Q2QL80, B9A0U9, P51636, Q07DW0, B5XGJ9, Q00PK0, A8JF90, Q2QLC2, Q2IBA4, C1FFJ7, Q09YN7, U3K6A0, I3NDE2, O46550, U6CRD4, A0M8S6, G8GCE6, Q09YJ1, Q4RS85, B9EQC8, Q2IBD6, U3IX33, Q2QLF3, G1KFI5, F1P026, Q2QL91, Q2QLB1, K7CPH1, G1T7J8, G1RLA2, E9PCT3, V8P8L9, Q53X57, A0M8T7, H0Z4B6, Q07E39, Q07DZ3, R1D8H0, F7C1W2, Q2IBC2, Q09YL4, K7BWC2, H0XQ31, Q09YH9, H3AWR5, Q2QLE2, A0A0D9REV3, F6W…	Caveolin	UniProt
SCNN1G	-4.6	UniProtKB	A0A0A7JU11, G1LXW8, F1RPF1, A0A0D9R3K9, A0A0A7JTS5, G3QWQ8, A0A0A7JY78, Q28738, A0A096NHD9, W5Q558, H2QAR5, F6Q7G2, H0UT09, A0A0A7JU05, A0A0A7JTT1, G1TDL6, H0WH25, F1NW62, G1N4M0, G1P7J1, F6U4Y2, A0A0A7JY71, I3M421, W5LUA2, G3W678, A0A0A7JWF8, P51170, H3AU95, W5MSK2, K7FSQ4, A0A0A7JWG3, M4AZ89, F6Q9Y1, A0A0A7JTB0, H9GLJ5, U3KI22, G3X8J1, A5X2V1, A0A0A7JWG9, U3D7A2, B8QP46, F7INI6, M3YKZ4, E2RJH6,…	Uncharacterized protein	InterPro
LOC102129856	-4.59
CMTM4	-4.57	UniProtKB	F6WRH9, A0A0C9RUN1, A0A0D9QX78, W5NVJ2, J9P8D1, F7H6T3, F7AX11, G1PQ01, G3U105, H2NR43, M3WM87, A0A0A1WK15, G3SI89, K7GHP7, G1QV71, U3JYX7, U3FKV9, F6PVR9, H2QB98, G3RDD8, H0WVQ5, I3MAA8, D2H9C0, H3A7P5, Q8IZR5, G1SM56, K7EB82, M3Y180, H9G6N4, U3J3M2, F7HQF8, A4IFB9, F1P203, H0ZHN0, J3QRP2, H0VTA2, G1N3T9	CKLF-like MARVEL transmembrane domain-containing protein 4	InterPro
GDF5	-4.57	UniProtKB	G3TIY5, G1P2I8, F1S4W8, F1T0J1, M3XF61, G1RGX5, B3RF47, F7BKJ7, Q2NKW7, D3YR76, B2KIC7, G1KEJ5, D3YR72, K7FU80, U3KDA2, C3PT60, H0YZG5, Q3LSM3, G3RHL0, F6WIE9, F7EE07, D3YRI8, I3NET6, G3X2G9, A0A0D9RDH1, M3Z276, H0XQJ3, B0CM78, D3YRA6, E2R0W8, H3ALT1, G1MSV0, R0JXX7, B7NZI8, D3YR87, P43026, H0VX96, B5FW51, H2P1R7, G1LTA9, F7I015, H2QK94, F1NGR7, W5PSD6, B1MTM2, F7CYF2, F1MT44, B0KWL9	Uncharacterized protein	UniProt
ARHGEF37	-4.56	UniProtKB	G3PX49, M3YS30, F7DV38, U3ISD3, F1PUV5, W5KTP0, M3W0P1, V8PB53, H2QRS0, G1PLB9, U3K2H8, F1MJ96, U3E3G2, G3TAM6, H3C6N8, F6U2Y2, G1KRH2, S4RTW8, D6RJH4, D2H8M9, H0WME3, A0A087Y5H9, H3AMS2, W5N308, H0UZM3, F6VCA2, G1MW19, M4AXM0, G3WSD0, K7FWK9, U3FKC9, A0A0D9RHB0, H3C4V9, G1RGS0, A1IGU5, F6UPW8, H9FU98, F7EN77, F7EN72, G1SRT2, W5P6A0, A0A096NBB2, I3MC35, H9F3I7, F1NZ00, H2PH18, F1RL91, A0A096MHW7,…	Uncharacterized protein	InterPro
SERPINB5	-4.56	UniProtKB	F1SMW3, M3YYL3, H0YV05, H2NWH8, B1MTB7, U3KEX6, G3X0L4, M3W9H2, K7F6E0, A0A024R2B6, F7CTZ9, G3T7I5, F7DMP5, F7GCY1, F7GDH2, W5P8T8, C9JLM5, G1PJ36, P36952, A0A0D9S023, G1LIJ9, F7ASZ9, H9GPF6, G1RBT6, G1TCD0, F6YDZ0, G1MZQ0, U3INS9, H2R6Q3, H0X9B7, E1BTE2, G3RPE0, A4FV69, F6XZ96, U3D1I0, E2REC1, A0A096N0K8	Serpin peptidase inhibitor, clade B (Ovalbumin), member 5, isoform CRA_b	Ensembl
ZNF205	-4.56	UniProtKB	K7AXE4, H2QAF6, H0WN95, Q58DK7, O95201, E2QY38, M3XDY8, C9JS60, I3L417, F6WR02, F7BTV5, H2NPX8, M3YUR5, G7NP66, I3LHL8, G3R8M5, F6RL37, A0A096NLA7, F7IMS1, G1LVM1, F6YU45, W5NT80, G1LVL8, F6YUD4, G3U688, G3X6I8, G1SZJ3, I3M303, G3TNV3, A0A0D9RCN4, C9JEY6, G1REN1	Uncharacterized protein	Ensembl
C4H6orf132	-4.54
SFTPB	-4.5	UniProtKB	P07988, G1QNV5, G3QGB2, I3N5A0, D6W5L6, G1L6C9, G3RY09, F7GMV3, G3TEA8, H0X6K8, F1SVC0, W5QH81, P17129, F7F166, F7DYC4, G3WTS6, H3A3Z6, P15781, H3A3Z7, P15782, F7DWA9, A7MAK4, A0A0D9RUK9, M3WNK3, F7F361, A7MAK5, E2R0C8, H9GGY0, H0Y7V6, P15285, M3YCH6, F7FI12, G1P4L2, H2P5L7, A0A096NZV5	Uncharacterized protein	Ensembl
LOC102114989	-4.49
ARHGEF16	-4.46	UniProtKB	T2MCE6, G1MSN4, F7BX38, K7E9D2, G3VGE6, H9H7W2, H9GPM7, H0W059, Q5VV41, M3WIX6, W5Q6H3, U3ICY8, G3T4Y3, F6TS84, M3Y7V5, I3LKZ2, H2N9D7, G1R9G9, U3BG19, H3BID8, G1U7H9, J9P2N2, A0A096N3F1, F6X9W6, F6Y083, H0WR83, A7E3Q3, F1Q028, K7F8M2, V8N844, G3SKV3, A7YY32, U3K4Q0, F7ASU8, E1BQT7, B0QZD4, B0QZD3, A0A0A9VXD6, D2HC13, H2PXV5, F1MFR9, H0YX59, F7HJG1, I3MW52	Uncharacterized protein	InterPro
LOC102115297	-4.42
LOC102119449	-4.41
LOC102142039	-4.41
ARL4D	-4.4	UniProtKB	E2R9P6, F1S1H1, G1KNI4, I3J5Z7, G3SQT4, Q5REU3, B5XCS1, G1Q4T6, H0UTY0, B5X5K7, H3A421, H0XN36, F7BSV5, A0A0D9SCE7, A0A096NBW7, G1R162, F6S4U6, M3XEK4, G1SMI8, D2HCT5, F7CXK4, U3CWZ0, U6DE61, H2QD50, Q0VC18, F7BSZ3, K7EXT4, W5NPK6, E6ZI00, P49703, F6URI0, V8PBS1, I3LWT4	Uncharacterized protein	UniProt
CDC42BPG	-4.4	UniProtKB	B0KWK6, W5PKP9, B0CM68, F6PXY6, J9NTY4, A0A0D9R4X0, V8NAA9, K7G3M3, I3MEA1, F6UZG8, M3YM50, F6Q7R1, F1PRS6, G3T3U2, G3TU43, F1RQR3, G3S831, A6QP95, H2R2M9, V8N999, H2NCY7, F6YCS7, F7EZM2, G3QDM3, E1B8W0, G1MHI0, G3STW6, Q6DT37, H0X0D6, H0VBN5, H9GRG6, H9GDB7, G3VVE4, G3T2R0, F6Z971, C3PT50, B5SNL1, H3BFD6, M3WGK4, F6QDN3, V8N8B0, F6R5E6, G1QZY3, G1PRX8	Non-specific serine/threonine protein kinase	UniProt
LOC102129261	-4.37
NT5C3B	-4.37	UniProtKB	W5Q8F4, F6ZD53, Q5ZKF6, I3M717, S4R8U7, M4A2W8, G3TCP7, F7H5P1, F6TJ24, H2ZRP4, E2R095, G1PJA3, G1KTJ9, E5RJR6, H2NU22, G1STG5, C9J758, G3R3Q4, U3KQB1, H2QD06, G1RJZ7, U3J8D9, W5N4N1, E5RH64, H9KWW8, H0VV35, U3JCZ4, G1LGP6, H0ZUC3, Q969T7, M3YH65, H0XP24, G1N599, A0A0D9S2C0, W5UDC5, G3VGG1, M3XB03, A0A096P5P9	5'-nucleotidase	UniProt
LOC101864948	-4.35
LOC101866425	-4.35
PLCB1	-4.35	UniProtKB	G1KBF0, F6SD46, W5UJE3, A0A0D9SFE7, V8P5W0, F7FSH8, I3MR14, K7DLT5, A0A0D9SG17, Q3LZV8, F7FSH1, U3EKX0, F6T8C1, F6ZEN7, G3UBY5, G3SQN0, F6ZKK2, H2M1G8, B1AK73, H2P106, S4RTE5, I3N3T9, Q8IV91, Q8IV92, U3IZQ7, A0A087WW73, P10894, A0A0D9SGI7, G1RVN2, A0A0D9RMA8, A0A087WT80, U3CAQ2, A0A096NVH5, H9FRV8, Q9NQ66, F6VVA6, T2M532, G1SSV4, W5PHF5, F6R8R8, H0WUK0, V8P4U0, F6ZKL2, H3APZ2, H2QJY4, M3WLN6, U3K…	Phosphoinositide phospholipase C	InterPro
SERINC2	-4.33	UniProtKB	F1PZZ8, M3W1R5, H2N877, H2PYJ0, F1MP92, G1NTN6, Q96SA4, G1MQ50, A0A0D9S7Y9, M3YVG4, F6V419, H0X9R9, F6XQ26, G3QYU9, H9G3J7, A0JNJ7, A0A096MUM3, F6U4M5, H0V3C6, U3F5Q7, Q96IM8, K7G808, G1MHA6, D3DPN6, I2CWY2, I3LQH2, Q5ZJZ8, G1QMI4, G1QMI8, H0ZVR0, Q96AI1, Q58CW5, U3JEK1, G1TAH0, K7DD39, I3LYP8, W5NTT6, U3IRR8, F1Q077, G3W0V3, F7DN48, G3SX22, G3RMP3	Uncharacterized protein	InterPro
LOC102130209	-4.32
LOC102146064	-4.32
LAMP5	-4.31	UniProtKB	F1SBK6, G1KAF4, H0V9Z8, A0A0B4J1C8, Q9UJQ1, A0A0D9RMD7, H0Z725, G1SZX8, H2M0S8, H0WVZ1, H2P108, G1RW35, G3WH95, I3IX22, H2TIG2, Q5R5V2, A0A0B4J1D8, K7BG79, A0A096NVH7, U3J4K5, G1PKQ6, G3RC35, H3AAR2, W5NI38, I3LWM2, M3Y4Z5, M4A205, A4FV27, A0A087X8C9, G1L702, W5KFB4, G1N3S7, F7DCD2, F6VV53, W5PJK0, G3T172, E2R467, U3K971, M3W512, S4R830, K7GE46, W8B8V7, G3PG40, A0A034WEM6, F6X052, F7FKK1, F7DCA0,…	Lysosome-associated membrane glycoprotein 5	InterPro
LOC102130900	-4.31
LOC102126586	-4.3
FAM129B	-4.29	UniProtKB	H2PTG0, H9GHS5, Q96TA1, G1MVF7, G1S6Q5, K7E208, K7FQG4, U3IUX5, F1RS15, M3YQW2, F6SE00, H0YY29, F6TTM4, E2RR68, G3QEE7, G1MEE3, I3N2T1, G3TJD3, U3JSF8, G3X0C7, F6U2I4, M3VWQ9, G1PMT0, W5PQR0, F7AMD7, F6U296, H0X0S1, H0WBG8, G1SMT2, H2R6B0, F1MD34, A0A096P204	Uncharacterized protein	Ensembl
KIAA0754	-4.29	UniProtKB	Q69ZZ9	Uncharacterized protein KIAA0754	MGI
MSLN	-4.29	UniProtKB	Q13421	Mesothelin	UniProt
EPB41L4B	-4.27	UniProtKB	H3BWE9, G3U781, A0A0D9RGR0, U3IU98, F7EFR2, G1TB41, M3Y7K0, H0VFI0, H0ZCP2, W5PAR0, G1NXA7, A0A096P0X5, A0A096P0X6, F7ESA5, M4AFA5, F1MD05, G1KFY9, Q9H329, H2QXN9, F6UVS2, F1SP12, H2PT00, G1MIA4, H2TE83, G3QNK1, G3SYX9, M3WE85, H2TE82, H3A3I5, U3JPE9, G1N4K0, H0WS82, F7IA41, Q9NX84, F1Q1Y8, H2LYQ7, A0A087YGR7, I3MIS7, G3VLQ9, F6UVV7, I3JFM0, G1S6L5, K7FY80, W5PAQ9, F6ZZK6, A0A096LZ16, G3S1M1	Uncharacterized protein	InterPro
TACC2	-4.26	UniProtKB	H0X1S7, H0Y9Y7, F7HA54, F7HA56, Q4VXL8, K7GS18, F7HA58, K7EFB6, G3WDZ5, I7GGY6, U3JHH7, H2NBT9, F7A0J3, F1PV31, G3QQJ0, H0YA73, K7GT58, I3NGQ4, Q4VXL4, K7GQ88, O95359, H0Y8P9, D6RAA5, I3LM30, W5P9W0, K7GNL9, F1P5B7, F6S486, G1NG67, K7GMV0, F7HA60, G1SE54, H0ZM29, K7GQV8, H2TSG7, G1LWJ3, F7F315, H0Y911, F7HA98, E9PGB3, H0Y954, F1MDB9, E9PBC6, A0A096NU15, F7I005, M3XV15, F6ZG21, F6ZFQ6, E7EMZ9, U3J…	Uncharacterized protein	Ensembl
TMEM98	-4.26	UniProtKB	D2GU67, U3I8M8, G3X0F7, Q9Y2Y6, W5PJS3, U3K4B2, G3T6X6, G1SXI5, E2RJZ3, A0A096P3T1, H2NTB1, M3YTL1, F7CK95, G1KN87, G7NGU8, G1R286, F6ZJ86, K7E9M1, H0ZWR7, F7BJ64, G3RBY8, I3MI95, K7FFQ3, M3VVM3, F1MX62, V8PBS9, Q2HJB9, H0UTA4, H2QCN1, H0XDB0, F1RKX0	Uncharacterized protein	Ensembl
ISL2	-4.24	UniProtKB	U3K825, I3M715, G3RY29, Q96A47, H2NNW1, F7B9K3, G1R9U3, G3SBV2, F7D1A6, G3SG14, F7DL07, E1BM60, F6X948, H0WJT1, M3Z0X5, K7FF14, F1T0J9, M3VU13, W5NTQ5, A0A0D9RQB4, H0YN25, H3ASQ3, A0A096NMU0, P53410, J9P914, F6SPX8, H2Q9V1, G1LNR8, F7DLS9, G3WTN3, H0VG13, H0YZD4, G1TJ76, G3SHE0, F7E240, G3TYA3, G3SXK6, V8N224	Uncharacterized protein	InterPro
RAB3D	-4.23	UniProtKB	F7FGV1, E1BNX1, O95716, R0KL56, D2HGW9, F7I8G8, F1S5W6, G3RE65, H2QFD5, H3B2A7, E2RFR4, G3VYK3, M3Y2M9, G1RPK5, E3TGL6, A0A0D9R3C0, F6UG33, G3TU21, A0A024R7G2, H0X280, F7FH09, G1PU41, E2RHH4, B5X2Y7, K7EEG8, M3X1S4, A0A0A0MWM3, G1TJ67, F7DZ70, U6D7V1, G1KT46, V8P5V2, W5Q9V4, I3NH34, K7FXM1, H2NXL7	RAB3D, member RAS oncogene family, isoform CRA_b	UniProt
CCDC129	-4.22	UniProtKB	U3IN71, I3LDH0, A0A096P058, G1THA2, H0VFC8, M3VUA9, F1Q1T3, F1MFJ0, G1KXY0, G3TLH7, A0A0D9RQL2, M3Y1Z1, H2QUE1, U3IN85, I3M1G2, G3MXW6, M3WXW2, G1KW03, F7CJZ3, Q6ZRS4, F7BYE8, F7CK27, E7EQ43, G3R326, F7A4R0, F1Q1S1, G1LK69, K7G5M7, F1SIK0, G1RZ20, I3NBG3, G1QFR4, W5PBU2, H2PMG3, U3IN75, H0WP45, E7ERG9, G1Q4D0, F6U408	Uncharacterized protein	InterPro
HOOK2	-4.22	UniProtKB	H9FGT0, G1U9G2, G1PL48, G1RQL9, M3XZT8, H9G7K4, W5PMU6, F7IQ90, I3LDR1, H2RE25, K7EV04, G3S7D9, H0UUP2, F7C4H2, E2RT26, F6QVZ5, Q96ED9, F6VLN8, E1BI15, I3MHV7, G1M0S7, M3X1X0, G3TQI3, G3WSN5, H0Y092, A0A0A0MUG2	Uncharacterized protein	Ensembl
MARVELD2	-4.22	UniProtKB	F6SYH6, M3YSV0, I3L7A8, R4GKP0, H0YTJ6, F6RAH0, Q8N4S9, G1P115, A7E397, V8NVN1, M3XBR8, F7IR75, H2QR12, U3KCZ2, I3LP26, G3WY33, D6RA09, G3RHQ2, G3T8S0, H0VU16, I3M4V7, A0A0G2JN23, H2PFS1, F7IR90, F1MKJ9, A0A0D9RT67, G1L973, F7HRN6, W5P6E4, H3AS45, E2R3Z9, A0A096MKZ4, H0WUB6, J9NZ91, U3IS34, F7ESR0, G1QW31, G1SQ75	Uncharacterized protein	Ensembl
C8H8orf82	-4.2
PTPRF	-4.2	UniProtKB	U3F6L3, F7HRR0, F1N897, G3R1J3, U3CS43, A7MBJ4, A0A0D9S7I9, V8P6S2, H0WI12, H0ZAM5, H9ZBS9, G3SCN2, G3SP12, H0Y6Z7, U3JSK0, F7HL18, G1L3U9, H9ZBT0, F7F3G5, D2HSQ6, M3YQF3, H0VGN7, M3WLZ3, F7C1W3, A0A096N6R0, A0A0C9RLM5, F7HBA2, A0A096N7E0, H9FXU2, H9FXU3, I3MG01, H2N7P4, H2N7P3, W5NQN3, F7GQD0, F7FB73, P10586, F7DNP8, E2RE81, E2RE80, G3UF93, F6Y6T3, H0Y4H1, F7HRQ3, H0Y380, F7H285, G1NBY3, G1PTQ5,…	Protein-tyrosine-phosphatase	UniProt
TMEM61	-4.2	UniProtKB	V8P1C8, H9F255, U3BHQ7, Q8N0U2	Transmembrane protein 61	UniProt
SFXN2	-4.18	UniProtKB	Q5EA43, G3SVI0, U6CXY3, E6ZHS7, M3X509, F6WRD2, M3YZJ7, H0ZIW4, R4GNC2, F7GAT5, G1PKX1, G3X372, B5X5M1, W8BQT8, H9F5V7, G1MHK0, F1PU56, K7F801, F7FUJ4, G1TF18, F1NDD1, R4GMS6, F7D0H7, H0VR45, A0A034VL69, R4GMW0, A0A0C4DGR6, C1BPS3, H2NBG2, H2Q2I1, A0A096P6F6, R4GMR9, U3K247, G1ND51, F7H8V3, A0A0A9Y776, I3MMY7, Q96NB2, G1RYX3, R4GN74, F6SJM0, C1BIQ3, W5NUR6, G1KCP7, G3R1U1, A0A0B2VMB1, T2M7K1, W5U…	Sideroflexin	UniProt
ALDH3A2	-4.17	UniProtKB	W0V6W7, H0VPJ5, J3KTD9, K7ET48, F1PW70, G1RIK2, A6QQT4, Q5RF60, A0A0B2VZT0, I3L2W1, I3L0X1, G7NGG6, K7EN73, F7C1B5, F6TG74, J3QS00, F1SDC7, J3QKK9, G1LCD5, A0A0D9R678, A0A0C9RAF2, G1NWD6, W5Q9M1, E2RPP8, G3VXD5, H2NVB7, G3VXD4, G3QXF5, H0XGS8, A0A0A1WJM9, M3XLV6, I3MAN4, F7C1D1, G3SRD4, K7DDP9, J3QRD1, A0A096P349, H2ZTZ0, A0A0B2US81, F6TGG3, W5Q9L8, J3KTG1, C9JGJ2, I3L4G6, H2QCF4, F7F4H6, F6VZI4,…	Aldehyde dehydrogenase	Ensembl
ERRFI1	-4.17	UniProtKB	G1SM49, G1RBZ6, F6SQ62, G3UFH7, G1MQD7, G3QU83, A0A096N4S6, H9GP89, G1Q7T4, K7FZX1, H0WUA4, I3MEG0, H0VCT2, R0JKY1, A0JN98, M3Y5C0, F7H303, W5PK30, M3W225, H2N988, I6S2Y9, G1LAJ7, E2R0Y6, H0YWC1, Q9UJM3, H2PXX8, G3WU52, U3K5N1, F7A9H2, F6XYX6, E1C8Y8	Uncharacterized protein	Ensembl
LOC102116739	-4.15
LOC102119323	-4.15
TJP3	-4.15	UniProtKB	G3ULR1, F6YH55, A0A0D9RF10, A0A0A0MUV2, G3UJ05, O95049, M3XY77, H2NX07, U3KAU5, G1MQN6, G3QPN7, F1N8X8, O62683, G1QQY3, F1Q080, U3I9Q5, Q29RS2, K7E6Q5, G3VEL1, K7ESC0, M3W768, F1S7Q6, H9GPH3, F1MEC0, H0VX47, H0XGY2, F7BHF0, G1LGY1, G1PGM9, Q2VPE5, F6WP06, F6WF73, F6US31, H0W7T5, H2QEZ5, F7EVL5, G3S0I2, I3N1K7, F7CU43, H0YPF7, G1LGZ8	Uncharacterized protein	Ensembl
HDAC11	-4.14	UniProtKB	A0A024R2I1, G1PWI9, G3TXX8, F7D6G8, H9F963, A0A096NQM0, F1MWX4, B5MCQ6, E7ETT9, W5U7J0, F1NYW6, A0A0A1WDX3, F6U3R4, B5MCU6, G1QY87, F7HYS2, Q6IA14, G3QXL9, G3VQL1, H0Z042, G1LSL4, K7GA78, G1N197, A0A096MTA7, H2QM36, K7EGC1, M3Z0Q0, A0A0D9RAS1, I3MFL3, G1KL76, F1PSI9, H2P9B0, F6WJS2, A7E372, Q9GKU5, M3W7T9, F6PH00, I2CXN6, H0WVX3, H0V882, B5MCS3, F7I141, B5MD06, U3IX25, W5NU68, K7DAK7, F7HB86, H3A…	Histone deacetylase 11, isoform CRA_i	Ensembl
LMAN1L	-4.14	UniProtKB	G3QJP2, G3VGA1, F6XVR4, H2RDB7, I3MM06, A0A096NMR7, M3VUL0, G1RX29, F7GVI4, F1SJ28, F7GVI2, G1T262, M3Z0T2, H3BN74, F6YXJ1, H0WSE2, W5NYW1, F7GVI6, I3LI87, Q9HAT1, M3XI75, F6QAE9, F6XDF3, H3BSC9, H2NNS7, E1BJ99, I3N8P5, F6Z447, G3TNF4, W5NYV9, H0V1N3, E2RCH1, E2RCH0, G1LQC6, A0A0D9RP50	Uncharacterized protein	InterPro
LOC102142391	-4.08
PCDHB2	-4.08	UniProtKB	E2REJ2, F7GRK2, I3NA15, Q4KMG6, Q9Y5E7, G1SA21, G1TQW4, M3VWI7, H9FFR5, F6U9V7, H2R5A0, Q5DRD2, G1Q119, A0A0D9S9H4	Uncharacterized protein	InterPro
LOC102124230	-4.07
MTUS1	-4.07	UniProtKB	A0A096MXQ0, E1BX08, F6RQ74, M3X6L2, E2RCA9, G1M4Y5, E1BML2, H0WPG9, F6TSX3, Q5R9I1, W5PH46, F7DJI8, G3T4C7, G3W646, F7G765, U3K9V1, K7GCM5, Q17QT2, Q9ULD2, H0Z9X1, M3Z2P3, G1SNG1, G1NG95, H2QVT1, F7DKL8, H0VCU6, H2PPN2, G3REX5, U3IQI1, G1QQX9, I3MZH8	Uncharacterized protein	Ensembl
LOC102128861	-4.06
BEX2	-4.05	UniProtKB	Q2TBV0, F6XD12, G3QS69, G1R7Q4, H2QYY0, Q9BXY8, A0A096MQ86, H2PWC2	Uncharacterized protein	Ensembl
LOC102117652	-4.05
ZNF219	-4.05	UniProtKB	G3V4M7, G3RQA6, H2SCD7, U3DIZ2, F1PKT0, F7HDP4, H2Q7X8, G3U9T4, A0A087YB84, A0A096LWC3, W5QEI8, I3JLZ9, H0WAN8, A0A0D9RVM0, G1SY66, F7I7Z1, G3V2W3, G3VNX0, F6TTB3, F7GEQ7, H9F569, A0A096NNN9, G3QW73, F6VM01, E1BCL9, H9GQ28, G3V4T1, G1LIW4, G1RVZ7, G1U3J3, J9P0R8, G1P8A0, G3V2E3, G3Q550, M3XM53, G3V2Q8, M3WLJ5, W5LG14, Q9P2Y4, G5E6W5, H0XTD7, H2NKJ7, W5M3F2, H3ALD3, M4AQB1, G3V3F2, I3MSB3, H9F007,…	Uncharacterized protein	InterPro
SLC2A10	-4.04	UniProtKB	M3WEY4, F1ME70, G3WZH8, G1MYG1, O95528, M3Z1M1, H2QKI8, Q8TDC7, H0Z4R1, H0W6A6, F1SBG4, H2P272, U3B5U9, A0A087WUH5, G3TWV0, G3TXR8, W5PHF8, H0WTR8, U3INT8, F7CID4, F7HWB5, G1PSW4, H3AK82, G1TTE2, F7DGS8, A0A096NSE0, K7C6L9, F7EH61, F7FLK8, K7FZZ0, I3MNQ0, G1KZF8, G1R5D3, A0A0D9RQU2, F1PS50, G3RBZ4, G3WZH9, F1NQ65, G1KSX7, U3JRE3	Solute carrier family 2, facilitated glucose transporter member 10	GO_Central
GLTPD1	-4.01	UniProtKB	H3BHN9, R4GFJ2, F6RDA0, T2MCF5, H3BHN6, S4S694, H2PXT6	Uncharacterized protein	Ensembl
PCDHB16	-4.01	UniProtKB	F7D662, H9FEG1, F1MNF3, Q9NRJ7, G1QC44, H2QRN3, F7CX56, A0A096LP81	Protocadherin beta-16	InterPro
LOC102135832	-4
LOC102140470	-4
OLFM4	-4	UniProtKB	F1MVJ8, G1PNZ8, A0A096MWK9, H0ZQD0, W5P9S6, G3WXX4, Q6UX06, E2RHC2, G1K8G3, H2Q7M2, G1LPP8, F7H4W7, F7HEY0, G1NQ14, F6ZC86, H2NJZ9, G3R975, G3S8G4, G1TVQ8, G3TKD7, G1S108, F7GIR4, U3JZW5, U3IPP2, K7FBR3, F1NXH9, F1RJ68, A0A024QZ95, M3XS40, F7DQV2, I3N1C8, F7DPZ6, H0X2P6, H0VQ46, A6QQC9, M3WZE7, A0A0D9RYI2	Olfactomedin 4, isoform CRA_a	InterPro
TMEM150A	-3.98	UniProtKB	F7DVP9, F2Z311, E1BF09, F6QNH7, R0JJ48, C9JN48, F6XV05, F6YFN8, F7D9Q7, F7DVQ4, Q86TG1, H2QI98, H9F8E4, F8VVL7, G7NAJ0, H9GQ02, H9F112, F7D6T7, E1C9H3	Transmembrane protein 150A	GO_Central
FRMPD1	-3.97	UniProtKB	I2CW38, H9GIM7, G1TGX3, H9FE83, G3SM86, G1P5P1, F1ST70, G1NA47, G3MZZ8, W5PP67, I3MEC1, E1C071, G3WWC5, E2RHX5, A0A096P148, F6TKH6, H0Z9U2, F6SRW1, H0Z9U3, F6VJG5, W5N5D1, H2QXA3, H0VCR7, Q4RZB9, F6SGY2, G3Q3K2, A0A0B2V832, U3KEN7, H2L994, F6PMA2, G3QVL0, A0A0D9REI5, H0X2A6, G1QTS6, M3WG04, U3J3P3, Q5SYB0, I3J620, M3Y418, H2PRP8, G1LEI2, K7F693, G1LEI3, U3J3P0	Uncharacterized protein	InterPro
ATP6V1B1	-3.96	UniProtKB	C9JNS9, J9NUJ1, E2R1W5, F7GYR8, F1SLE5, G3SWM1, H3C835, U3I8K3, M3Y7G3, P31407, G3QWI3, H0VGW7, M3WIV9, A6QP02, C9JZ02, F6TVH5, W5M0G3, G1RGY2, U3JVP1, H2P5W7, F7B6Z3, G3VR61, G1TQ38, C9J5E3, W5PNV7, H9GD50, D2H0D7, A0A0D9RRS2, P15313, H3A405, C9JL73, G3TQV9, I3MA30, H0XD18, F6RLX9, F6WPC2, A0A096N0R0, V5NR16, H2QI31, K7FTR4, F7A752, F1N688	Uncharacterized protein	Ensembl
LOC102118475	-3.96
PKP2	-3.95	UniProtKB	P53170, H2RI10, H0ZMP6, U3K3Y8, F6S0Z1, E2RHY0, G1NKT3, H0WS04, K7FET8, H2Q5P7, G3VIF1, H9EV12, M3X980, F6Y9B8, Q99959, I3NGM1, H0VL79, A0A096NZ62, E1C2V3, U3ECM3, F6Y9D7, G1S3V6, G1NW15, G1LQN1, M3XMC1, H3AJG4, V8NXE2, W5QDE8, H2R7B3, G3TVE4, F7BBG2, U6CT17, A0A0F8B408, F6U3D2, Q9FLW9, G1KM54, H2NGY4, B8QGS9, B8QGS8, G3QI71, F6PI83, U3DMB2, G1SCF7, A0A0D9R4T8, M3XL11, A4IF71, F1SGD2, G3RQ65, F1N…	Uncharacterized protein	Ensembl
SLC28A3	-3.95	UniProtKB	H3CKG4, M3WDR8, W5PGL3, W5PGL5, F1P2E4, U3ISF7, F1MGR1, A0A0B2VQB7, I3MSL3, G3TE18, G3QFW3, A0A0B2W2N2, K7F6M5, F6TSP1, F1S4H3, G1QU00, I3MQQ3, G3WUM9, H2ZUV3, I3KCP0, A0A0D9R560, Q9HAS3, F7F2P2, A0A0B2W5K6, F6VYV0, M3XSV2, Q9UA35, H0WL07, T2M5N5, F6V1R7, H2PSJ0, A0A0F8BVN7, F7EYP2, H0VN59, H0YY48, S4R551, G5E7R8, H2LKK0, H2R405, A4UQU5, G1K9F8, A0A087YLL9, I3N7C4, G1P663, G3S5X2, A0A096P1W2, H2T…	Uncharacterized protein	InterPro
SPINT1	-3.95	UniProtKB	F7ISZ5, H3BMB6, H2MRG4, W5QGE5, F6UF80, G3S4A5, U3J961, F7CZL1, G3WU07, Q2KJJ7, H0VQA6, G1PW58, H9F264, H0XEX6, G1MEQ0, H3BSM2, G3QW99, H9G7H3, F1PQ47, H3BTQ8, H2Q972, I3LWH2, A0A0D9R5G8, H3BNW5, F1SST4, G1NF52, F6SZP7, O43278, H0ZKI0, G1QT08, K7G5T1, F6XWR7, U3JUF3, M3YBI2, M3WL76, A0A096NTJ0, F1P2Y9, F7EVK9, G1T9A5, K7G5T9, H3BVD9, H3BR01, H2NMV8, G3TDS8	Uncharacterized protein	Ensembl
LOC102124007	-3.94
PICK1	-3.93	UniProtKB	Q5REH1, A0A034VQN1, Q2T9M1, Q8SY07, E1BQ62, X2JDZ1, H9H7M2, G3W095, U6D2J8, F7IKM7, F1MU52, C1BP68, G3UAG3, W8BA67, F6TII1, F7DB33, G1NIS1, Q4R7Q5, M3YNN0, W8B377, G3T3Y1, A0A024R1R7, H3ACF1, F6V107, F1N6J2, A0A0D9R3D4, K7G651, I3MJU5, A0A024R1J5, H9GM29, H2QLN1, A0A034VN27, F6Z9S9, Q86PF5, F6ZAK4, K7G664, A0A096NK07, E7EX80, F7CXB0, Q9NRD5, M3VZ64, H2P4C6, F1SKP0, G1SME7, H0XD53, G1PVE8, W5Q001,…	Protein interacting with PRKCA 1, isoform CRA_a	Ensembl
GRHL2	-3.91	UniProtKB	J9P9J5, F7FSL0, G3WTB5, A0A096MXW7, U3JTM5, F1S0Q6, Q6ISB3, H0V5X5, G3T5G7, M3YUN4, F7BG04, H2PQX9, K7F766, G1KI77, F1NXA4, H0ZPC0, F7HKR5, H2QWI7, G3SG69, H0WQL7, G1QSX7, J9P6H9, G1NI44, U3I521, I3LYP7, F6TV32, F7IP83, F1PBL0, M3W372, G1L0D3, G1PH53, G1SMG2, W5QAC9, F1N6S4	Uncharacterized protein	Ensembl
LOC102138516	-3.9
EPHB3	-3.89	UniProtKB	U3IQJ8, Q07498, H9FAC4, F1NIS8, G1MEV5, F7C2E5, G1NAF7, V8NAL3, G3UKJ1, H0ZJI7, F1ML02, A0A096N0L6, G3UBC6, P54753, M3WAA3, F7FUF5, F1PAD5, G1T3S2, M3XUT9, G1R347, H0UV56, D3K5K6, K7GGG0, F7FT46, F7DPU2, U3B7P6, H2QNV9, D3DNT9, F7G567, U3K0H2, G3W1U3, U6DNB3, W5QHB1, G3RJK3, H9GDK1, H9FK95, F1P9P1, H0XNQ5, A0A0D9RN13, I3MDK0, G1R352, K7GGF3, F7ELA0, G1PQN2, F7DPT0	Receptor protein-tyrosine kinase	UniProt
LOC101866740	-3.88
NUCB2	-3.88	UniProtKB	H0ZEB8, F7IJM5, E2RM11, A0A096N756, H2NE04, W5XKG6, F1NGB1, I3LZE5, T2MED7, A0A087WSV8, H9EMB8, F6XCE7, U6DVY0, G1S7M8, M3YPJ8, A0A097EV82, H0YEG8, P80303, H0YD18, G1L8F2, G3SZU0, F6YXD8, U3JDE6, M3W7H2, F1T2L9, E9PJP3, F6Y426, G3X004, H3BBJ0, H0W0K2, G3QSY6, W5P1C2, U3ISH1, E9PM22, K7E3M1, A0A0D9QXP0, H0WTG6, E9PLR0, H0W2D2, G1K876, F7IH71, A7LNF5, K7G5H2, A7LNF4, E9PLE9, A7LNF3, G1P1N8, H2Q384,…	Nucleobindin-2	InterPro
HINT2	-3.87	UniProtKB	M3ZBE1, F7GRL0, H0YUB3, G3WLV8, F1STB2, M3WHJ0, W5PQ45, T2M659, C1BYS2, A0A0D9RE08, F7D5N4, G1Q012, Q9BX68, G1SR26, C3KHP6, G1LTN1, C1C4I6, F6RG00, C3KIL1, U3JBI8, G3TEB8, U3JBI9, A0A096P167, F7HKZ2, H3B000, F7EQY7, H0X5L5, C3KHA1, H2PRR9, C1BG47, U6DDE0, I3M8V9, H9G6Z1, H3AZZ9, H0UTW5, M3Y2J5, Q8SQ21, E2RF32, G3R6M3, H2QX91	Uncharacterized protein	InterPro
LOC102136748	-3.87
MMAB	-3.87	UniProtKB	F6V9Y7, C1BNW6, W5PZZ9, G3WBN0, E3EFJ1, G1PU98, G3TDN5, H2NIL0, H0ZAI0, H0VJ29, U6CU01, Q96EY8, M3XXQ7, F1RIS6, C1BXH0, G1T6G1, M5CJ67, A0A096ND23, I3N5X5, H9F426, G1QNU1, T2M7P1, U3K1W7, H0XCR3, F7E0L7, G1N3K3, C1BFA1, E2R163, G1MDY1, Q58D49, H2Q6U6, F6YU02, C1BNT1, M3WQM3, F6UBX5, E1B6Z7, R0JJ40, G3RZW3, F7DX52	Uncharacterized protein	Ensembl
FBXO32	-3.86	UniProtKB	Q5ZHM6, G3WN57, A0A024R9F3, F6WK33, R0LJL3, G1QZV8, U3JIG4, G1KJ90, I3LZ86, W5PJS7, Q969P5, G3SS69, H0ZQB7, G1NJ13, H0XD61, F7A6U2, G1SN84, M3XQ12, G1PMB0, K7FE80, H2PR49, F6V026, A0A096MS55, F6RIR8, F1RR28, G3QKF2, D2HPI0, E2RIW8, Q2KHT6, H2QWP0, F7GVE8, H0VFT9, Q1A730	F-box protein 32, isoform CRA_c	Ensembl
KLF5	-3.85	UniProtKB	F7BI98, F1NY43, G3MWY3, M3X9D0, F6RPZ8, G1T126, H0WLD3, A1XSZ0, A0A034WUR0, G1PQ61, F7GX31, F1RHF4, F6U556, R0LSL7, A1XWJ7, W5Q1P2, W5Q1P3, G3VI00, H0ZQK3, G3QL42, H3A5Q5, H3A5Q6, F1RHF5, G3RWJ2, F6SME2, K7F8B5, W8BY26, H2NK19, V8NQ75, H2Q7N0, K7BXG6, A0A0B2VLL2, G3U504, E2RNV6, G1S209, F7CZG5, Q5T6X2, G1K8Y3, A0A0D9RYF3, H9FHG5, G1T1W5, H2RIF6, G1NQ00, U3JE06, F7HA49, A0A096N7X3, I3N0K5, G3SQ46,…	Krueppel-like factor 5	InterPro
PNPLA2	-3.85	UniProtKB	G3R5F3, G1RBF2, B3TZB4, K7FV84, H2SY63, H2SY64, Q2KI18, A0A096N487, G3TCL2, F6QQ01, F1PHT9, G4WMG7, H9H6Q9, A5JT14, A5JT15, G3UFY7, A0A087Y1R1, H3DF76, W5P633, G3VEU8, M3X6E2, G3NPQ1, G3NPQ3, G1KR24, Q96AD5, B3SPX0, G3TTJ9, I3M5S4, H0ZHP0, G1LK35, G5E5T0, H2NCC5, U3K7C6, T2M869, U3J0L9, A0A023I9C5, H2Q2V9, F6PRF8, F7BM81, G3S651, F6PHR1, H3AN21, W5LAQ6, H0XF23, A0A096N557, G1NA23, H2LPA1, A0A0D9R…	Patatin-like phospholipase domain-containing protein 2	InterPro
LOC102116680	-3.84
NGFRAP1	-3.84	UniProtKB	F6U9M4, G3QW02, M3Z5V9, F1RYD2, G1MJR9, G1PQP8, H0WC37, A0A096MLW9, H2QYY2, H2PWC6, W5PJL6, Q3ZBJ6, Q00994, K7C282, F7H6N3, H0XC32, G1TG54, Q14991, F1PR09, G1SAA0, G3U394	Uncharacterized protein	Ensembl
TBC1D30	-3.84	UniProtKB	H9H741, U3J0A2, G1P946, H0XT52, U3K5V8, H2R7H4, F6RD34, F1P6L6, H0Z848, G1KBX0, F7EJN1, M3WY26, F7IM44, K7FEF9, G1NCY0, A0A096NZ60, G3VVV3, G3SC20, H2NHY0, W5NZ38, Q9Y2I9, I3MM19, I3LBK2, G1TV08, F6TLM8, H0VBG0, G1S579, G1MIK6, F1MQA4, G3T512, M3Z1F1, F1NHZ6	Uncharacterized protein	Ensembl
WDR72	-3.84	UniProtKB	M3Y808, I3MPN0, Q3MJ13, G1SQM6, E1BC63, G1LZ67, A0A096NM53, G1PHA2, F7D463, E1BQP5, K7G0G5, H2NNA4, H9GIJ0, G1R467, U3IN66, U3KBR7, G1N349, F6XVF5, G3VJG0, H2R8D9, F6X711, G3REQ6, F6S905, F7CRQ8, H0X0H4, F6Z5F6, H0VII2, M3WFV7, W5QID4	Uncharacterized protein	Ensembl
EFNA1	-3.82	UniProtKB	W5UE05, G3VY37, E2QUE4, P20827, F6RY19, H2N5I2, G1P1X1, I3MCB7, H0X9W5, A0A0D9S5A3, G7MDW0, F1RGR4, A0A096N996, Q3ZC64, F7GEC5, H2Q067, A8K0M4, G3R1K1, U6CUT0, G3SLA5, G1RMD8, V8N767, D2HJM2, F7B5R2, F6UJM9, F6TTG9, H1A0X0, F6WFS0, G1SLI2, F7AMD6, W5P0E4, U3IQ57, M3X089, M3Y2W5, Q06AS9	Uncharacterized protein	Ensembl
GATM	-3.81	UniProtKB	F1Q3D6, G1R1M8, H0X0M3, Q2HJ74, H9G945, W1J1P3, G1N6J6, G3TIM1, U3K9W2, Q9I9K9, U6DK66, S0F3G4, A0A096NLZ6, I3MIP7, H2NN48, F6Z4H7, H2Q9D1, F7A204, F7GZ52, P50441, G3VNE7, W5QIR6, P50440, H0VB49, F7CQX3, G7MX82, G1P8U0, Q4R806, F7GZ40, F1NXN3, K7FEY6, G3RTK2, Q5RFB9, F6TSW8, A0A0D9RD16, G1T784, M3X5Y1, G3R5T0, V8NCY9, A0A077NXR0, A0A024R5Q4, H9F4I1, M3YI80, U3I6G0, G1M1W7	Glycine amidinotransferase (L-arginine:glycine amidinotransferase), isoform CRA_a	GOC
PPEF2	-3.81	UniProtKB	H2QPP9, H2PDN0, G1M7N5, G1R9A5, G1T7U0, A0A0D9QXB4, U3K199, G1M7R2, G3RXM8, G3QUU0, W5Q335, F7HXK0, U3JA10, G1KMR3, V8NN26, E1B9Y5, W5M8R5, F6SFD1, A0A096MYK2, G1NBY5, H0YTW9, H0XAJ1, E2R7D2, H2ZZJ1, H2RG16, G1U8J2, G3T8Y9, K7FY46, M3YBI7, F6YKU1, F6SFA1, F1RYU8, O14830, F6ZI83, G1PUB0, I3ME00, F7I4P5, H2R1J7, F7EHU1, V8NML7, M3W5Y3, G3VCS5, H0V9J6, F7EHU6	Serine/threonine-protein phosphatase	InterPro
EGF	-3.8	UniProtKB	F7B762, F7B726, H2PE43, F7E718, W5PJQ6, Q95ND4, Q9BEA0, M3VUW6, F1PWS8, H2QQ13, F7HIN6, G3VFM6, G3VFM5, A0A096N8N3, F7E702, E9NX15, U3JVF6, H0WQH5, J9SG97, G3TC14, I3MW38, F6R392, Q26661, M3YAV8, G1PSH1, P01133, J9NZ75, A0A096NAR3, H0UUP9, G1KJV5, F6T5D5, G1S3J7, Q6PPB4, G3S6T2, G3QSQ3, F1NEP5, Q00968, M3WWG8, F7GXF4, U3DWK0, G1NEX1, K7F4H3, K7F4H4, U3IWP0, U6DB28, F6TFM0, G1M8V3, H0Z1B5, A0A0D9Q…	Uncharacterized protein	Ensembl
LOC101865553	-3.8
LOC102115376	-3.8
LOC102147290	-3.8
PPP1R13L	-3.8	UniProtKB	K7EN03, Q8WUF5, A0A024R0Q5, K7EHI9, I3L801, H0X9T2, V8N7Y7, H3B202, H2QGL5, F6QX89, H9FHA4, Q0VCZ5, G1QNC9, M3X7J6, K7EPP1, F6QX18, M3Y3M3, E2RDK5, G1PK96, F7II93, G3VIJ7, G1TJH6, G1M1A0, F7IIB4, G1Q8R4, G3SPB3, H0VTR1, G3U1K3, I3LY15, A7YME7, W5PJL0, F7IKP4, A0A0D9S1X2, A0A0A0MXC2, F7DF17, H2NZ82, H9FG29, A0A087WUG2, H0ZUY9, H9GEK5	Protein phosphatase 1, regulatory (Inhibitor) subunit 13 like, isoform CRA_a	Ensembl
LOC102122025	-3.79
LOC102125392	-3.79
LOC101926393	-3.78
TMEM79	-3.78	UniProtKB	R4GIG2, A0A096MRS3, M3XZJ4, M3WFR9, H2N5E1, G3REA6, K7GAG6, F7D701, R4GDK5, F7CYJ6, U3BGX0, G1T4A9, G3WN02, H2Q093, F7I676, G3UDI7, V8N9X7, G1PBN7, H0X801, H9FCC1, D2HW68, H9H104, U3IPL1, Q5E9U3, I2CW07, W5P719, H0WB70, H9FHB1, U3JEL6, Q9BSE2, F1RP15, I3MWV6, E2QT78, F6XIM1, F7H8J8	Uncharacterized protein	Ensembl
LOC102136812	-3.77
G0S2	-3.76	UniProtKB	R0LMX4, M3Z4U3, D9IU67, M3WLX2, G3N127, K7EZF8, H2Q121, H2N3U1, G3QK46, U3KJL5, P27469, F7GK66, G1KEP0, F6YH06, G1SKX3, F7HFB2, H0XTV9, I3N3K4, D2HIJ8, W5P2G6, A0A096NCL4, H0WAP9, G3WAI0, G1Q734	Uncharacterized protein	Ensembl
SMIM5	-3.76	UniProtKB	E1BAR0, Q71RC9	Small integral membrane protein 5	UniProt
C9H10orf35	-3.75
FAM20A	-3.75	UniProtKB	D2HSY0, W5Q021, F6SZH8, H0Z0W1, A0A096NU12, I3MX81, U3ILP0, F6WFV9, H2R9F3, F7G9S3, U3KNM4, G3QKR8, H2NVQ4, G3VZ47, M3WEB3, Q96MK3, F1RV24, M3YSW4, G1NVU8, G3SLL7, K7CKT2, H9GJP7, H0XDP0, G1QNQ2, F1Q2V7, F1MJW4, F7HJ60, K7FQI1, H0VGX2, F6VRT0, U3JIK2, F7C843, G1N536	Uncharacterized protein	Ensembl
GPR125	-3.75	UniProtKB	V8P7S6, W5P5J3, F7D4N6, G1K980, H0ZGW9, F1PA06, E1C199, F7GX18, U3B0D2, F6WDX1	Uncharacterized protein	UniProt
LOC102119768	-3.75
SSFA2	-3.75	UniProtKB	Q5REU9, H0W8R3, H2QJ32, P28290, F6RLL6, K7DU36, E1BET5, U3E6M5, F1NKX6, M3V801, G1L8U5, K7F254, W5Q5U1, W5Q5U0, F1PNH8, K7ARP5, G1NA78, G3QIE0, G3UML1, U3JLR9, F6ZH09, U3IYH2, I3LWX0, F6SC08, H9G7T8, H9EWP9, G1PIY2, F6SC00, H3AVU9, E7EUL7, U3EY69, G1R3D5, F6SB40, G3SXS5, H0XER6, H9EZ47, F7BY73, K7DCS2, M3XT72, F6PQ17, K7BV66, G1SYN2, E9PHV5, K7CP33, A0A096MTC4, H7BZ26, J9NXP4, G3WU17, F6TUI4, A0A…	Uncharacterized protein	InterPro
TBX3	-3.75	UniProtKB	I3MEA8, E2RB25, G1L2P7, F7HRE2, F6WW74, F6ZHS6, K7ESW7, O73718, F7HKU0, U3IT21, A0A024RBL6, G3UF13, F7EGN6, H2NIS5, M3XUE1, A0A0A1XR06, F6WW65, H0XEW6, M3WYI5, O15119, K7BPU9, H3ABS1, G1P9L1, H2R1C1, J9PB78, A0A096MW81, F7I557, H9G432, F6RTB6, A0A0D9S4A5, G3RT81, H0V224, G3QNP1, H9H1Q8, A0A024RBQ4, H9GM97, G1T7Q7, W5P8D8, U3JZC9, W5P8D6, A0A034VQA1, W5P8D7, G3SRE9, F7E3Y2, G3VNU1, G1QH79, A0A087W…	T-box 3 (Ulnar mammary syndrome), isoform CRA_c	Ensembl
CTDSPL	-3.73	UniProtKB	F6Y2U1, M3XUU1, W5NR60, H9F9U3, G1MW45, F7EWL1, H0YQ29, U3IQQ4, I2CTS7, H2R387, K7B1N5, U3JVM9, F7II95, E6ZIV5, G3UTZ2, H0UU95, F7II91, I3LYQ4, G1PFQ6, G3VH82, O15194, K7FUK4, M3VY82, A0A096N3K7, G1KED3, I3L819, G3UTF1, H2PB63, U3CHM9, G3SZ97, F1MB22, D2GZR2, R4GIJ0, U3DF82, H0WQA9, G3QMH8, H3A708, H9H7C3, G1QZ52, G3UPN5, H7C2S4, A0A0D9RNY3	Uncharacterized protein	Ensembl
SLC22A3	-3.73	UniProtKB	I3IVS3, U3KBU7, F1SB80, B1PM34, M3XJJ2, A0A0D9RIQ7, M3VUL3, G3WVY7, U3IR20, K7GET8, H3A4Y5, I3M907, H0VG70, F6TY97, A0A096NZX8, F1MXY3, F7DHK4, W5JZL7, F7BTT8, G1SLB8, A0A061R6T5, H0WQ52, A0A061R4U1, G3SWZ1, G1M926, G1RKS4, F7CPI9, E1BXN3, G3QHT4, F6Q073, G1NIH0, Q96KH7, M3XZW6, O75751, F8SRE4, G1P519, G1KBW0, H2PKT2, H2QU04, H0ZMK1, U3BHE1, E2R0J8, W5P3P3	MFS transporter, OCT family, solute carrier family 22 (Organic cation transporter), member 3	InterPro
LYRM5	-3.72	UniProtKB	K7G9F3, A0A096NBX7, M3W649, H0VHI0, H0XBZ5, I3N310, L7MRV1, Q0VCR0, H9GNS5, W5QFI1, G1Q7P6, G3QZR1, G1LLX5, F7FN02, H9ENS3, Q6IPR1, F7A7R3, F1SFJ7, F7AB18, U3JMM0, G3T1H8, R0JN64, G1T2L5, H2NGU0, J9NVS8, F6Z5M0, E1BTS3, H0ZPS2, G3VWM8, H2R7A0	Uncharacterized protein	Ensembl
RNF141	-3.72	UniProtKB	Q8WVD5, E9PQV2, H0ZCC7, F7GRH4, U3JE43, Q5ZM74, K7CFP4, A0A0D9QX07, G1P6G0, G3TC72, H2NE42, H2NE41, V8NIZ8, A0A0B2VSS7, G1SIC8, G1KI74, H3BFQ9, U3DD60, I3LDC9, A0A096N839, E9PLX2, R0LWG1, D2H3H2, F7CHJ3, G1N2R3, F1Q4F0, Q32L15, F7AVV4, H0WJA3, Q5R7K8, Q2XNS1, M3YN44, I3N3R3, W5PNB6, F7DJU9, H2Q365, G3VGR4, M3WTE2, G3QKU0, T2M8R3, F6W815, H0Y097, K7G0M1, G1S770, H0VAX5	Uncharacterized protein	Ensembl
ECHDC2	-3.71	UniProtKB	H0ZFL0, F7HDB5, G1S8M1, M3VXQ6, G1NFE0, G1TCC2, Q2TBT3, H9F2V2, A0A096MPR3, Q86YB7, M3Y601, F6Z962, F6RJU0, Q86V13, A0A0B4J2T1, U3JSX2, G1KHT5, V8PFK5, H0VGY8, F6XMQ1, F7ALV9, G3SUI7, G3W7T9, A0A0A9XKV6, A0A0D9S793, K7FZT7, H2ZZE7, A0A0F8D144, F6ZRP1, K7C2E5, H2N7D3, F5GWU3, F6Z954, G1Q0D8, I3MFF0, G1LS80, G3VBM4, V8PHA8, H0X8T6, F1NSS6, G3R0Z3, F1S750, U3IIZ6, K7B969	Uncharacterized protein	InterPro
LOC101866950	-3.71
LOC102126089	-3.71
ARFGAP3	-3.7	UniProtKB	H2ZZ94, G1LK78, H2ZZ95, G1U6J6, H0ZPS7, U3JML2, Q9NP61, F1SJR4, G1KS32, H0X124, E2RT72, G1NLW6, G3RF12, A0A024R4U0, M3YXY8, I3MUF3, A0A0D9R008, M3W9U8, F7GR93, G1S1Q9, K7FZK2, F7IFQ7, Q5R787, H0W0F6, M3XLJ9, G1P2T7, G2HJF0, U3J476, G3SYT7, F6PWY1, W5QCM1, W5QCM2, Q17R07, F6YT60, G3TYE8, A0A096NKG2, G3UIK3, F6XXI0, A0A096NKG0, F6YCI5, E2RT80, B0QYV8, G3VJY3, B0QYV9, Q4R4C9, Q08DK2, F1NZX4	ADP-ribosylation factor GTPase activating protein 3, isoform CRA_a	InterPro
LOC102140471	-3.69
MAPK8IP2	-3.69	UniProtKB	G3TJW6, F7ABH4, H2R6X2, G3VQ70, Q86VW5, G3X783, H9F181, H9FS70, I3MYA2, U3JXT3, U3EAS4, Q13387, U3CT27, H0XTA5, U3IKW3, G1PGK7, A0A096NL65, F7FSK2, H0VAL0, W5QFG5, M3X4P2, G1QK34, F7GBB4, G3QWG6, E2RQE0, H2P4X5, F7AYQ5, G1L8P1, G1SHH3, M3XS85	Uncharacterized protein	Ensembl
SOSTDC1	-3.69	UniProtKB	G1KMT3, W5PF09, F6T7A1, G1LV72, F1PUT3, G3R2X4, Q5R5D2, G3UMC2, H2RCY3, G1S2Y8, G1T3J2, G1PR45, M3W2N9, A0A096N248, A0A0D9RLU8, H9FAM3, U3IJE8, V8NPW7, J9P1A3, F7BAK0, F6W1Q4, U3K5U4, F7C9I3, H0WWM3, Q2HJ20, G1Q5A8, H3ARS1, F6USK0, A4D125, H0YWE6, G3USU1, K7FLU0, Q6X4U4, F6USQ7, H0VRZ1, I3M2D3, Q6VYA3, M3YRF8, G1NCI5	Uncharacterized protein	InterPro
NCMAP	-3.67	UniProtKB	Q5T1S8	Noncompact myelin-associated protein	UniProt
YES1	-3.67	UniProtKB	G1R586, G3S8M9, V8NV82, Q28923, J3QRU1, G1Q254, H0ZIS1, F6ZR07, E6ZJ40, P09324, G1LJ17, F6YPC4, A0A0D9RYF4, G3QEE8, W5KIN8, G1KI30, H0WMN4, U3JUR6, P07947, H2NVZ4, M3WB17, F7G374, G1NBR9, V8PBH1, F7E686, H9EM44, K7FJ21, G3SQD0, H0VTP1, F6VI70, H2QE70, H3B9Z2, M3Y204, W5PIG2, R0LSP4, G1SPV2, A7MB57, A0A096MYI8, F1PSB7	Non-specific protein-tyrosine kinase	UniProt
ICK	-3.66	UniProtKB	G3QD76, W5NJQ3, U6DAT8, F1S7C7, G1THZ7, G1LGH4, A0A0D9RL19, G3SVD5, E1BTD4, H9ERD5, R0LT23, H2M1B3, Q9UPZ9, V8NGC7, E2REA2, A0A024RD59, H2PJD7, G1KI60, K7BPI4, G3SAL2, G1QTW9, G1NMD4, A5PK06, H2ZSX5, H0ZRL3, I3MJA6, H3DGL4, M4A777, W5KP58, T2M3N1, D4N2R4, F7HL89, A0A096NJ90, M3YBW8, G1UDF3, H0WX85, K7G982, F6Z040, H2UMP3, H2UMP4, H2UMP5, W5Q0N2, G1NYK1, K7BMT8, G3WRZ1, F7H188, H2UMP6, H2UMP7, G3N…	Intestinal cell (MAK-like) kinase, isoform CRA_a	UniProt
LOC102131298	-3.65
LOC102144825	-3.65
INSIG1	-3.64	UniProtKB	A0JNC3, H2PP51, G1PVG6, K7G874, U3IIK9, V8PEC7, Q5ZMT9, W5P9G9, H9EVZ0, F6Y9H0, M3YDU4, F7CFM3, I6NVT4, Q8CFA6, M3WVQ4, E2RJ47, H9H3E5, I6NVT0, U3JWN1, F6XME3, C9JSG8, K7B0U9, G3RT31, G1L328, G1RI47, I6P588, A0A096NRW2, H0XST0, G3U9S8, G3UB33, I3MYH4, H0YQZ7, F5H6P3, O15503, F6K442, A0A024RD68, G3WIX0, I6P496, I1WZP5, F6US22, I6P499, F1SHU4, F7BYS4, F6YYC7, E6ZIZ9, H7C5L3, G1N049, G1KKP8, H2N2V0,…	Insulin-induced gene protein	UniProt
LOC102139772	-3.61
LOC101866748	-3.6
UFSP1	-3.6	UniProtKB	Q6NVU6, H9G4U2, H2PLR1, F7HPE3, H0UWX7, F1MIM7, F7A907, U6DGK3, A0A096MNU2, G1SB49, I3MXV5, F7HFA5, K7FKY6, H0XUV5, W8BQX7, W5Q8T8, H9F3S7, A0A034VU88, C3KK32, Q4V6M7, G3RX46, H2RHA9, G7MNW2, H9F1F1	Putative Ufm1-specific protease 1	UniProt
BCKDK	-3.59	UniProtKB	W5PFL7, A0A0D9R0A5, A0A096NHX7, F6SPR9, A0A0F8AYV0, I3LX29, G1SH80, H2NQS0, F6VEQ6, F7HVU4, H2QAZ6, U3EU98, G1P364, F7HCZ7, A0A061RG68, Q2KJG8, Q4SEM6, M3YJE2, G3RCN0, H9GC67, H3AKR9, K7G1D6, F6V080, H0UV73, T2MJL2, W5PFM0, G3TN47, F7DTJ6, O14874, M3VYT7, H0XB86, G1S270, F7FRI9, F1RIR7, A0A024QZA9, G1LL32, G3WE42	Branched chain ketoacid dehydrogenase kinase, isoform CRA_b	Ensembl
BOK	-3.59	UniProtKB	F1N8M0, G3TZ97, Q9I8I2, A0A0D9R0C9, M3WKE8, H2P970, V8NNM4, A0A024R4A8, F1SIN7, H2REG3, G3UCC8, T2M3H9, G1TXB3, Q005V3, G1R8A1, K7CSU3, U3JLA0, G1MDG6, A0A034WDW1, H0VUC0, K7FJF5, W8ANI2, G1K8X4, Q9UL32, H0Z6R8, H0XQN5, U3ISP1, M3XM76, C1C4H5, A0A034WG76, Q53NU8, Q9UMX3, Q53QM7, G3RI13, F7AGS1, F7G9S0, A6H6W7, I3N6F3, H3AJU3, A0A096NDW6, F6SBR3, G1MWK7, F6VX55, W8BLI1, G3VAK3, G1QFV7, R0KNK1, F7C…	BCL2-related ovarian killer, isoform CRA_a	Ensembl
CHRM3	-3.59	UniProtKB	U3KL06, G3WNI1, U3J4B5, G1NGD1, G3U625, Q96RG9, F6UA55, M3YMR1, F7EAQ8, G1MP56, H9AZ80, H9AZ81, F6XBA3, M3X7A6, I3NBR3, F7FDL4, G1S9U9, B1AN12, H0W1Z3, M3XL82, F1PGZ2, G1Q9Z8, H2N3A8, A0A0D9SDE0, H9AZ39, W5Q8R1, H9AZA1, F1NMN4, K7F1F2, P41984, G1U308, Q9N2A3, Q9N2A4, F2YMD3, Q9N2A2, A0A024R3S2, H9AZB1, F6PY26, H0WFS4, H2Q1E6, H9AZ68, P49578, P20309, O88615, V8NSH3, G3UP35, U3D417, H9AZ97, H9AZ96,…	Muscarinic acetylcholine receptor	Ensembl
JUP	-3.59	UniProtKB	U3E7U8, Q8SPJ1, I3M6Y1, H0V0I7, G3SR99, G1P2X8, F6V1T9, C9JKY1, F7DNP7, G1KUH3, G1T2J0, M3VXY4, C9JTX4, H9KYH7, G3VP42, F7H7V0, H2NU25, M3YHH7, G3R3M9, K7ERP3, A0A0D9S2D4, H2QD03, K7EB40, C9J826, E1C1V3, U3J5G0, W5Q7R8, P14923, G1LGG3, H9KWW5, C9JPI2, H0X0R4, H0YW18, A0A024R1X8, K7F404, A0A096P5P4, G1RJN3, U3JC11, K7D368, C9JK18	Junction plakoglobin, isoform CRA_a	InterPro
ARMCX3	-3.58	UniProtKB	I3MCW8, Q9UH62, F6RKR8, Q5R9J3, F7GD88, G1PZV7, G1LPU0, G1SMN9, H0X106, G3S8E5, W5NUC8, L7MSJ2, F6TMP3, G3T5U9, E1BE36, M3X964, A0A096NP19, M3Z600, A0A024RCF9, H2QYX1, E2RJG1, K7GPS6, H0VJU4, K7GM67	Armadillo repeat containing, X-linked 3, isoform CRA_a	Ensembl
KCNK6	-3.58	UniProtKB	G1NWU7, H2NYN5, I3N2K8, B5X0S7, A0A0D9QVS1, Q4RFW1, H3BAU4, F6R751, H0WP30, F6VVU9, M3Z2B7, F1MX91, G1LV73, F1RKJ5, G1TGR5, E2QV67, U6D8H8, H2QG80, F7B062, G3R3G0, G3VML8, F6RD93, H9G893, Q9Y257, U3BD05, J9P493, G3UIV8, G1S4T6, A0A0B2VD76, M3WLF4, W5P6C6, Q8R452, Q8R453, F7BYH0, B2RDS2	Potassium channel subfamily K member 6	InterPro
KLHL21	-3.58	UniProtKB	G1LST4, G1MR98, K7FAG3, F1RIK0, Q9UJP4, I3N661, K7EMF2, G3QVB9, G3SX09, G3TS71, H0VCD0, U3J7U6, K7ELI0, G1SKB3, G1NUQ4, M3XDB8, F7H8M4, F1MEK2, U3K5E1, M3Y5W5, K7AD10, F7DLL6, H9F0F0, K7ESH2, M3VK42, G1RBA3, U3B9U9, Q08DS0, H2R2L1, G3VZV2, H2N9A2, E2R7I6, F7GDQ0, H9H5V2, H9F9E3, A0A096NDF5, F7EDJ1, W5PNZ2, F6T144, H0WIS5, A0A0D9S8S0, H3B7U6, F1NU24, H0YWI5	Uncharacterized protein	Ensembl
LOC102120707	-3.57
LOC101865533	-3.56
LOC102124455	-3.56
SELENBP1	-3.56	UniProtKB	F7CI32, B4UT06, Q5RF48, Q9H8A8, H0Y532, F1ST01, H2ZTF6, H2PZY9, C9JVL0, H2N5V8, I2CVY8, G1TT06, W5QIK8, F7DNQ5, H0W8J0, G1MR11, G1RGS6, I3MYM0, F7DKR3, F1PNH6, F6VWU2, K7GJH4, G3R4S6, T2MDL3, B7NZD6, A0A0D9S5T9, G1L1G7, G3SB02, U3K8N1, K7EE95, F7ASU6, M3XXA1, M3VXE7, F7DAQ6, A0A096MWP7, F8WCR4, C1FXU6, A6PVX1, Q2KJ32, F2Z2W8, A9X1A2, G3WNJ0, G3T848, Q13228, H9FCH1, B1MTG9	Uncharacterized protein	Ensembl
PRR18	-3.55	UniProtKB	Q6PAN7	Proline-rich protein 18	MGI
KCNN4	-3.54	UniProtKB	G3SMQ8, W5PGP3, W5M9C3, W5LAP1, H3B720, A0A0D9S1F0, G3TNZ1, M0R2E8, F6XLS0, K7FM58, H3CJ70, E1BFX7, K7BT53, D1MQ10, O15554, F6PPT3, G3QRW2, H2NZ38, Q8WMG4, Q6JDK0, H2QGI3, A0A087XNU7, H9G9A0, F6U9L4, G3NXB2, Q06D01, F6VG20, U6D5U9, M3VW01, G1SQG9, Q08D94, S4RVY3, G1QME8, I3MTF5, H2RFG3, M0R2F1, F1PFH0, A0A0A0MX78, H0WUW1, D3XE74, M4A827, F1PNK5, G1LC04, G1PEH7, M0R1J0, M0QZ70, D1MQ09, G9K6V8, D1M…	Uncharacterized protein	InterPro
LOC101925220	-3.54
LOC102120976	-3.54
LOC102130578	-3.54
KAZALD1	-3.53	UniProtKB	M3YZR4, H2Q2G1, A0A096P6B2, W5Q485, H2NBC7, F6ZTQ7, G3WKG1, F1MKW1, H0XJL0, G1NCS4, G1PNH1, V8PH39, M3WN37, G3S137, F1NLB5, V8PH34, U3K1Y3, F6UH10, G1SIR9, F6WXT0, F7GA84, K7FN94, H0VSY9, I3MPF1, I3LUZ5, G1RXR2, G3STS2, J9P2F4, A0A0C9PWR9, G1MGV7, Q96I82, A0A0D9QZR1, G3QPD7, H9GH87, D2GXU3, H0ZID4, U3IB08, W5N0Y6, F6UH21, F7EGQ0, H3AMA6	Uncharacterized protein	InterPro
CKB	-3.52	UniProtKB	K7G7R1, H0VEV2, H2Q8Y8, H3ASR4, M3XD39, I3MS67, G1NL16, H0XI03, U3JJL5, P05122, A6YLM1, P05124, W5UJ22, P00567, H9FE66, Q9N1C7, U3JJL6, H0YJJ7, H2NMC1, H0ZRK1, F7F8C2, G1MIK9, G1SVY8, H0YJK0, F1NZ30, G3UG66, F6Y2Q4, Q5EA61, G3QWS2, H0YJG0, Q29594, T2MHG3, V8P3U9, G3UTB0, F6S9W9, F6Y4T3, A0A096NJY5, R0L0P0, M3W8P6, I3LPB5, G3SAL1, M3XTD3, G3V4N7, F6RDH6, G3V461, P12277, G5E7M6, N1QD55, A0A0D9RZ81,…	Uncharacterized protein	UniProt
LOC102116297	-3.51
AS3MT	-3.5	UniProtKB	H2NBG8, W5NX03, C1BLN3, R4G9E3, F7DBC7, Q9HBK9, G1DG41, F7D0V2, A0A061RKM6, A0A0D9QZA9, U3IX02, F1NCJ8, G3T8P2, M3YZI6, G1RYY8, Q58DQ0, F1S850, H0WPP4, U6CT01, F6Z8K8, G3RK91, G1SDQ1, E3TE24, H0ZIZ3, G3S6L0, H2Q437, B9ELI8, A0A096P6G3, A0A061R5U8, F7D0U5, H9F6D1, G1ND99, I3MN10, U3K257, M3X2B9, K7F8K2, F6QET2, A0A087WVD4, G1MHP7, T2M4M5	Arsenite methyltransferase	UniProt
LOC102136383	-3.5
FAM129A	-3.49	UniProtKB	I3MVX6, F7HHG2, F7CXT6, H9G6B2, G3VSI7, F1S3N7, F7BYZ1, A0A096MNV7, W5NZ80, U3JKH4, H2N4E3, G3R7K5, F1NG00, G3SLH8, F1N2F1, G1PDI0, F7CXS9, H0VH41, K7G2H4, F1P703, M3X8A8, Q9BZQ8, G1MRM0, H2Q0S1, F7ADC1, G1M4G1, M3YK89, G1S8R2, H0XEU1, F6RA51, F7HHE5, U3IIF9, G1T8T9	Uncharacterized protein	Ensembl
DMRT2	-3.48	UniProtKB	F6VXW6, X5FFK8, U3J2F4, W5PUQ9, G1NS45, G1KAN4, E1U7V7, F7CQP2, Q05C20, F6SFJ6, G1RB56, G1RB53, A0A0D9R8F3, G1SJF3, M3Y1G1, Q2TCL1, A0A0A0MR18, K7G4F4, R4GM47, G3SDP2, H0Z523, H0VCE2, G3T1Y7, M3W5Y2, F7HDQ9, H2QZM4, U6DEH6, F6VI53, E2RLR1, G1LJA5, Q8QGP4, H2QWY8, D5KTC4, H0WJT3, U3K735, G3W5W7, Q9Y5R5, A0A096P1N7, A0A0C9QJK5, G3RVS5, E1BC71, F6Y7Y2, I3LT76, I3MYT4, G1PID6, H2PS98, F7GCC2, F1SJG4,…	Uncharacterized protein	Ensembl
FAHD2A	-3.48	UniProtKB	G1TPZ3, H9FV51, T2M7T0, K7BQT9, U3JBD9, H9KYV1, U3FI48, M3WDR1, U3BUI8, E2RMW7, C9JGM0, F1MLX0, H2QIC3, Q96GK7, A0A024RE27, F6PYG6, F7CKR3, G1QGI3, F7IB95	Fumarylacetoacetate hydrolase domain containing 2A, isoform CRA_a	InterPro
KIAA1211L	-3.48
KRT7	-3.47	UniProtKB	M3Y8C8, W5Q6V2, A0A0D9R0H0, U3I0A3, H9H7S9, F7DZA2, E2R441, G1PF55, F7FTC3, A0A096NEU5, G1NF62, L7N097, K7F7Q7, K7AZG9, Q8HZR5, Q29S21, G1S7S3, F1PRB0, F7HIB7, G1L4L4, F7HIB5, U3E7V9, G3T5Y7, H0VIA2, G1KHP6, U3JPW5, F6VKS2, H2NHC9, F7BW95, I3MVD0, G3QUQ0, H9YZH5, F6SKV2, Q3KNV1, G1SHZ4, F6SKT7, G3WL72, Q3B834, A0A0B5D1B0, P08729, A5A6N0, H2Q5Y9, F6QU25, M3VUE5, H0WYK4	Uncharacterized protein	InterPro
LOC101926196	-3.47
LOC102132697	-3.47
RABL5	-3.47	UniProtKB	F6PS53, C1BW53, C1BLP3, H2QV55, T2M5X3, F6PS43, U3EK23, H0Z1N7, A0A024QYV3, F1NYS6, C1LDV4, B5X756, C3KK41, E3TDW6, Q4RWX1	RAB, member RAS oncogene family-like 5, isoform CRA_a	UniProt
SGMS2	-3.47	UniProtKB	D2H5H0, H9FK44, F1NLG9, E1BNX6, G1NU82, H0WPQ9, G3TGY9, F7CNS1, G9KNI4, H9GDN8, A0A096MZC6, H9FA91, G1N2G4, F1S122, H0Z0K3, F7DR07, E2QY94, Q4R763, G3RA31, U3KCW2, M3WGN5, W5PFK7, F7I6J8, H2PE26, F6ZBF5, I3LYF0, K7BXS9, G3VXB3, F6XWQ3, V8P023, Q8NHU3, K7FG41, G1SYC4, U3IHF9, H0VJW3, H2R0S6, G1RR96	Uncharacterized protein	Ensembl
SH3BP4	-3.47	UniProtKB	G1L4T8, F7DJ60, H2R3W7, E1BB46, G3VX87, W5QCY1, E2RQH0, H2P904, G1PJA2, H0XBX3, F7ITD9, Q9P0V3, K7F969, G1RB37, M3XGC7, F6T6Y1, F6WRY0, I3MRF1, G1U3F9, G1KJN7, G3RCE8, U3J7A0, U3JHM5, H0W7Q1, F7E2A9, G3TFK1, M3XTA8, F7ITE7, G1MUD0, A0A096N1P2, H0YY15	Uncharacterized protein	Ensembl
LOC102143394	-3.46
CD59	-3.45	UniProtKB	E9PR17, P13987, Q6FHM9, Q32PA1, M3WCR6, G1NCQ9, M3ZBA1, I3MH91, O62680, E9PI80, A0A0D9QZ73, P51447, V8P7N9, O77541, H0Z5A6, M3YJC7, H0YET2, W5Q927, E9PNW4, F6SUS4, Q28785, Q28216, G1THU6, H0WMJ6, P46657, P58020, H2Q3D9, F7E3L3, U3IGH4, V9NJE5, F6TA80, G3RL04, G1LL89, A0A096NRJ1, J9P4N4, Q5R510, P47777, F6QCT1, Q8SQ46, U3JF27, D9IVG0	Uncharacterized protein	InterPro
LOC101867177	-3.45
LOC102145613	-3.45
TSPAN8	-3.44	UniProtKB	E2QSC8, G1L131, H2SXI6, A0A096N3R0, H2SXI7, K7G6N1, V8NE18, A0A0A1XQE1, G1TFJ6, I3MKG8, H9H043, F7HBN1, M3ZWJ7, G3RKT3, I3KNK9, K7G6M4, F7D6R4, F6SXL2, U3J7M7, G1KG83, U3K6T7, H2NI22, H0VGF9, Q2KIS9, M3WJQ8, F7BZT7, A0A087X619, G1P5D1, H0XBL6, F7I4K3, Q5R9S6, G1QW97, W5NHA5, H2Q6G8, H2MSE9, I0FUP0, F1MP86, G3TK75, H0Z9X6, M3Z1B8, G3N6K9, H2ZVP4, G1NDZ3, E1C3Y3, A0A0D9QVV2, G3W156, W5PYR6, P19075,…	Tetraspanin	UniProt
ZNF883	-3.44	UniProtKB	H9FDU5, H9EZM2, P0CG24, G1SBF3	Uncharacterized protein	InterPro
CELSR2	-3.43	UniProtKB	F7ILW5, G1KK99, W5QCV8, A0A0D9S6J7, G3U950, K7FSG0, G1PBE0, G3X0B3, F7AN15, F6SGH4, H0X9A5, G3QRB0, E2R4F0, F6U0Y6, F6PVK7, M3WM93, F7ILV9, G3T9I7, A0A0A1WCN4, Q9HCU4, G1QQJ7, H0YT83, W5KN35, M3XV86, U3JI30, U3FXU3, A0A096MPJ3, H2PZK0, G1U0Y9, J9P8K7, U3IZF1, U3DKW1, F7AN07, G3MXZ5, G1LDF3, E1BJ11, H0VTZ9, V8PF74, H2N6I9, T2M506, I3MGV2, G1TA45, U3F2S0	Uncharacterized protein	Ensembl
CT62	-3.43
PLEKHH1	-3.43	UniProtKB	H0ZMN4, G1NH72, I0FFV1, F7FLH1, G3UKX5, H0V0K9, E2R9H2, Q9ULM0, U3JRB9, H2NLK4, G3QGM5, H0YKY5, G1QIV6, H9GAG7, A0A096NVP2, R4GBG0, G1LNH4, H2R9A1, E1BVF6, H3AA86, F6V5R1, H0XE04, F6VU91, G3WCS6, G1P2H1, F6URG8, U3I040, F1SA37, G3T5M8, E1BF01, H9FXL9, W5QJ52, F6Z6Y5, K7G9T5, M3WK16, F6VQ86, M3Y6S6, G3U556, K7G9W0, T2M3S1, G1SDL1, A0A0D9RLI6	Uncharacterized protein	InterPro
SEMA3E	-3.43	UniProtKB	F1MYW3, G3VEH4, H2QUV0, F6SQ35, K7GHB2, M3WSU4, G3T493, H0VK11, G1KSB1, G1MEA1, G1N1I1, G3RQ93, F6VAS8, H0YWA9, R0LRL3, F7DIP3, I3MF95, F1P0S7, H0X030, M3Z3L9, G1SZG8, U3K7S9, O42237, F7AVK1, O15041, W5Q1D5, G1P5H4, A0A096NDT4, H2PN11, F7F532, F6U5D8, F1SBX2	Uncharacterized protein	Ensembl
LOC102116629	-3.42
TCEAL3	-3.41	UniProtKB	H2RH39, U3CJM5, Q969E4, U3EH59, U3FYN6, F7D1V2, H9FQJ2, U3E9F0, H9FQJ4	Transcription elongation factor A protein-like 3	UniProt
CBY1	-3.4	UniProtKB	M3WV93, M3YNZ5, W5Q2F1, H0WAM4, F6QTX3, G7N3V5, I3MG22, B2CAW6, F6T9Z9, E1BT07, G3RBP0, G1LVX9, A0A096NK27, Q8MJK1, G1T3N7, A0A087WUW0, E2RKA5, G3TGD3, U3KDD8, G1KHF1, Q9Y3M2, K7F950, G1P0W1, H0Y132, H2P4D9, K7CQ99, H0ZJD3, U3J3P7, H2QLN8, F6W811, G1NIK4	Protein chibby homolog 1	Ensembl
PPL	-3.4	UniProtKB	V8NJ46, G3S6E5, Q6PVZ7, G3RA08, H9FLD8, G1PLW9, G1L4B1, F7BKB3, F7DK11, H2ZY21, U3CYG0, G3TUQ8, U3JPW1, H0YZA1, M3W2F8, K7BEN2, J9NU37, F1Q1I3, G1T1G8, A0A0D9R981, F1NV96, G3VRW0, G1RG22, H9GBH0, G3SRZ5, H9FDC5, G1NBX9, F1RK90, F6ZU67, M5FKH8, K7G9X7, G3VRV9, W5U5G6, K7EQ71, H0VJK4, O60437, H9FHI0, U3IBC7, W5P352, K7EKI8, F1N2K8, I3N6F9, H0WFZ5, H2NQ20, M3YTV4, H2QAI9, G1L4C7, A0A096NLI0, H9F5Y2	Uncharacterized protein	InterPro
SERTAD4	-3.4	UniProtKB	Q9NUC0, H0WD79, K7ABN2, H2ZWH7, F7CDD9, A0A096MMZ3, H2N3T3, F7G4R7, G1K9E8, F6RAV8, I3LUP4, I3MJI6, G1T467, G3T1K7, F6VCH7, G1NC33, G1PRA9, G3VKQ3, U3KDL6, H0YYE0, H2Q127, F7H857, H9F700, J9NTX3, K7FN59, M3XVJ3, M3XBW5, G3RD58, W5PRQ4, U3IJL5, D2I1H6, A0A096MPN7, V8PGF9, G1QNX0, H0WUF2, F7H840, E1B7X4, U3IJL4, R4GL91, A0A0D9RRY8, H0YYD9	Uncharacterized protein	InterPro
CNKSR1	-3.39	UniProtKB	G3SQG9, U3JCA1, G3V160, U3IK86, Q53GM7, G1PFF6, H0XF55, G1U7F4, M3YWE3, E1B9A8, G3USK0, H9GPP2, W5UKP5, Q969H4, F6UHP3, G3W5W9, I3LNS0, I3N7X3, M3WHM5, F7FZW3, V8NUI4, H0V985, F6XKN0, G1RDC4, H2N8G6, T2M8A2, B4DXN4, F7IC65, E2RDN9, G3SD79, A0A096MPR8, W5P5E5	Uncharacterized protein	Ensembl
RDH13	-3.39	UniProtKB	H3AJ74, W5LJX3, M3W4E8, W8BII1, B1GVZ3, H2P060, B1GVZ2, G1TI19, I3LY02, A0A087Y8P8, W8C428, G3P0V1, F7BXE8, H0VKS4, A0A0B8RZ76, U6D7Y8, B1GVY9, W5NV93, G3T2Y8, W8C5R8, H9EVT6, M4AX77, A0A024R4M8, A0A034WI81, G3RN31, A0A034W0F6, H2UNZ9, H2UNZ7, H2UNZ8, G1L9C6, W8BPC6, H2QH50, G1RIA9, W8CDP7, G1NT65, G3VHT0, G3QDX2, I2CTL6, E2QUH8, G3VHS9, Q8NBN7, E3TDU5, U3CVA4, F6VQ31, A0A0B2VYR2, M3Y9M4, A0A0D9S…	Retinol dehydrogenase 13 (All-trans and 9-cis), isoform CRA_a	Ensembl
RRAGD	-3.39	UniProtKB	V8NQ97, G1SNL8, G1PG52, F1Q235, R0M1N0, I3N762, F6T359, G3WMR0, G1QB72, H3ALS5, F6UTN3, G1NLM6, H3ALS6, G3SXA1, G1KPY9, W5PT62, G3RSW9, A0A0D9RXJ8, K7FSP9, G3RYP4, H2QTE5, U6DIC5, D2HK28, I3M9F9, H0ZQ86, H0WUS9, G3ULQ0, U3JK33, Q15I74, M3X3N9, H0V2Z4, F1S0C8, A0A0B2W0C5, H9EUI6, Q9NQL2, F6W0B0, F6W042, M3YCT9, E1BK97, A0A096P0A5, F6Q6M0, G1RRV0, H2PJT4	Uncharacterized protein	InterPro
B3GNT5	-3.38	UniProtKB	H0ZJQ8, F1NRQ5, A0A0D9SC12, E2R4J5, G1NS21, Q58CT5, D2H2B9, U3HZ02, G1KGV1, F6W1X2, G1SBB1, H2QNT6, H0XTT3, F1N1Y2, A0A096MYV7, F7D0E1, U3KLK8, F7D0L6, M3WYR5, C1L3R2, H2PC48, F7IAI1, K7AXR1, Q9BYG0, G3SJD6, C9IYY0, Q864U8, G1PVW8, W5QHJ8, C9J368, C9J5K2, G3SLL4, V8NMN8, G1SVN6, H0V3N1, M3Z6D2, F6VC66, I3MWR1, K7EXK5, G3WVZ2, F7CQU9	Uncharacterized protein	Ensembl
RHPN2	-3.38	UniProtKB	A4FUC9, G1PMH3, H9GCH1, F6Q2D5, W5P2J4, K7EL35, A0A0C9QM93, U3JBW9, H0ZGH1, F1P8I2, Q8IUC4, A0A0A0MU38, H2QFZ6, G1N278, F6Z6B8, F6Z0V9, F1NFZ9, H9EUR5, I3LZS9, F6XDY7, A0A0D9QXJ9, A0A034W8G1, G1MAP5, G3SKF8, G3TBK8, W8B931, U3IHP1, H3ADR7, M3Y8F9, M3WLL2, I3LRU1, G1R7X7, G3S357, Q8HXG3, G1TAG4, F6VY55, H2NYB9, F1MZ22, H0WIW9, U3DXK0, K7FY63, H0VKE2, U6CUR7, J9PB10, G3WUK3, F6ZI16	Rhophilin-2	InterPro
ABCB6	-3.37	UniProtKB	A0A034VQN2, F1PRH1, F6SB64, I3MGM5, F6YI14, E1BS10, A0A034VPM6, G1L6Q8, W8C2W4, A0A0D9R7A2, F7B1Z6, A5D7P7, M5C374, U3TD89, Q9NP58, Q8LPT1, U3THN0, V5GJI0, H7C049, G3T2Y7, H0Z5U2, U3TJK0, G1KN81, H2P8N5, G1T8R2, U3TJJ6, H0V3H2, A0A024R436, H0XDH5, F1SR85, F7B1Y8, H7BXK9, G1DGH6, U3TGG4, G1NHZ3, U6DC36, W5QF91, H3BEA4, H7C3Z0, G1QCJ3, F7E473, U3JNL9, F0ZKT7, F6XYD4, G3WKC1, K7EBJ0, M3WEQ8, G1RD55,…	ATP-binding cassette, sub-family B (MDR/TAP), member 6, isoform CRA_f	UniProt
ARHGEF40	-3.37	UniProtKB	A0A096MGB3, U3BQK7, G1LIY2, H9ZB34, A0A096NNN8, H2R3U5, V8NQK1, M4AQC6, I3JM00, I3JM01, H0VME8, F7IPC2, I3LFZ9, W6CUF4, G3VM34, K7DF58, F1MB21, H9GSS0, A0A0D9RVM7, H2M2J6, H0WFM2, F6YY39, G1P883, K7AKL4, H2NKJ6, H2S7A7, F7FTM4, G5E6W2, K7C0Q5, M3XM51, H2S7A4, H2S7A6, M3WLJ4, H2S7A5, G3QW68, W5LG09, G1SY61, F6YT40, F7HS80, I3MNV4, A0A087YBG1, G3Q555, Q8TER5, W5QEJ7, F1PME6, G1RVY9, H3CPP4	Uncharacterized protein	InterPro
FBXO2	-3.35	UniProtKB	Q17QK6, G1PL27, K7FF19, U3IML6, H9GNA0, G3TS52, F7H8Q2, I3NGK7, F1RF91, A0A096MNX2, F7DFP7, F7BHC3, H0X652, W5NSU6, Q9UK22, H0YVS1, M3YYA7, U3K691, G3WAC2, G1RER9, H2N943, G1LSZ8, H2PY06, F7DSI0, E2RGF8, M3X1M5, G1N3R6, F1NFN3, G3QI61, F1MFN6	Uncharacterized protein	Ensembl
LOC101867105	-3.35
LOC101925164	-3.35
LOC101867504	-3.33
SLC30A2	-3.33	UniProtKB	G1RD69, B5A8K5, G3SQG2, G1SRW9, G1PST2, G3RJW0, W5P641, A0A096N0N2, I3M568, F6R4E1, H0YS34, F7IJH8, F7IRI5, H9KZQ2, F7HRX8, A0A0D9S857, F1MMX3, I3LTT3, F7HRZ3, U3F747, A0A061R921, G3W1E7, G1TUI5, M3WHM3, F6W472, G1LV00, H0WGQ7, F6R8X6, G1MUM3, U3JCB7, H2N8H2, G3UUV5, H2R9B7, M3YWF2, H3B9F6, H9GPP9, E2RBS9, F7I3L4, F7IRH6, K7FSZ7, F7FZN1, F7FHX3, Q9BRI3, H0V0Y7, W5MBF7	Solute carrier family 30 (Zinc transporter), member 2	InterPro
LOC101867042	-3.32
ZDHHC23	-3.32	UniProtKB	G1T9E5, F1NJZ9, W5QE53, Q8IYP9, A0A096NQM2, H0ZT59, H0VP66, E1BC01, E6ZIT4, F7IJQ0, E9PAP7, R0L566, W5QE52, F6UPA1, H2P9P4, H0XCG9, G1P270, G1QXQ1, F7CNX6, M3XMI0, G3S3V6, M3X155, H3ADJ8, G1NNE1, F7CCF4, F7IJN6, F7IDJ7, G3R240, I3MRV2, B3KXV3, F1PM73, F6VHI5, G1LFD6, G3T5S7, K7F3C2, G1KV57, H2RCE2, G3VP36, A0A0D9R3J9, U3JTY8, F1SP96	Palmitoyltransferase	InterPro
CGREF1	-3.3	UniProtKB	I3LA52, Q24JZ6, G3QJG5, F1SEC5, G1QRD2, M3WCB0, F6WWI5, A0A096NZ08, A0A087Y7I6, G3TDH6, I3MPV6, H0UT31, G3PUT4, F7GPR1, A0A0D9RB15, W5QCT3, F1PVP6, M4AL31, G7N9M5, W5LX64, G1SVL4, K7B2G7, F7B5N3, F7B5N9, F6RYJ8, H2RC17, I3MTI3, Q99674, M3YDI7, H0XI45, F7I9L1, H3B1U4, H3B1U3, H3B1U5, G1L509	Uncharacterized protein	InterPro
LOC102115153	-3.3
LOC102133162	-3.3
LOC102134497	-3.3
TFAP2B	-3.29	UniProtKB	F7GKB8, I3MSU8, I3LU63, G3UK89, V8PJS2, U3J2Q0, H0ZSR3, F7HFW9, H2PJC1, G1TZ69, H2QT62, Q92481, H0WH07, G1LQ59, H3AMB9, Q76HI7, A0A0D9RKF9, G1NN65, X6R4Y8, G1KDX1, G1PU23, F6VFE2, G3WH36, Q0VC35, M3WMP4, F6YBR3, G3SBQ3, M3YCF1, K7FLC5, F6U0N4, W5PTF9, W5PTF8, H0W1W8, K7FLD0, A0A096NJ19, G3TRK8, F6TUI8, F6R2V1, G1QV41, G1LQ46, U3KE74, F7HFX1, V8PJB0, F6R2P2, G3RF96	Uncharacterized protein	Ensembl
LOC101925763	-3.28
RNF39	-3.28	UniProtKB	B6ICU6, Q7YR31, Q5TM52, G3VGP4, F7IGC4, I3KSD2, G3TTF1, F7IGF4, A0A0D9R6Y7, F7B0U8, Q9H2S5, H2RAL2, M3Y816, F7IGF8, H2PKY7, H2PKY6, F7ACZ5, F1PIF0, A0A096NLQ7, I3JJ12, F7H8L3, Q2L6J4, F7H8L5, H0Y0X0, I3M6G3, F1RYH4, G1QYG2, F7H8L1	Uncharacterized protein	InterPro
FOXJ3	-3.27	UniProtKB	T2M3A8, H0WC79, C9JXI1, G1RNV8, U3F439, H0WY14, C9JVP0, F7I2W5, G1L176, A0A0D9S7L3, M3YRI0, W5UEL8, Q29RQ0, H0WD15, A0A096MKU3, G1P5I4, Q9UPW0, G3TJB4, W5M0C8, W5M0A2, F7C0R5, H2R952, G1T1P6, F6ZUM7, H2N7S6, W5LC73, E1BK17, H7C1Y6, G1L182, G3WFE9, H3AJI7, F6VXT0, G3RCQ2, M3X393, G3TVC3, W5QGR2, F6SCJ5, W5QGR3, E2R0F1, F6WWW5, K7BVZ9, F7C0S4	Uncharacterized protein	UniProt
LOC101926679	-3.27
LOC102121202	-3.27
GPC4	-3.26	UniProtKB	H2QZ47, F7EBS1, Q86SV6, F6PWF8, G1T8I9, M3Y9V6, F6PQT7, G1MVZ0, G3QDB7, H0UW10, W5PRR2, H9F8M0, V8PC76, D2HAA5, F6QDK0, U3FMP7, K7GIL6, F6W6Z1, H3BE91, F1NAU1, G3WWH9, A0A0D9R633, H9GEQ1, G1NYQ0, U3JGK7, F1PM35, O75487, I3MKW0, F7A1I7, G3TCK3, F1MCX1, F1RTE1, H0WVF2, H0YXR4, M3W6M4, U3IJ70, A0A0A9WZF8, A0A096MRP2, G1QMQ5	Uncharacterized protein	InterPro
ZYG11B	-3.26	UniProtKB	Q9C0D3, F6X4C7, A8DPD7, F7BS01, F1NUU7, F1PFQ1, F7BSW2, F1S6I1, G1KHR7, K7EEV8, F6R5Q9, H2PZ15, F7BAX0, A7MB67	Uncharacterized protein	GO_Central
LOC102114955	-3.25
LOC102138412	-3.25
COBLL1	-3.24	UniProtKB	G1PAK4, W5P6S8, H2MR05, U3J907, G1QRF7, Q53SF7, F6QRJ5, M3XNL1, H9F371, G1QRF0, F1NLV6, W5MP71, F1PS60, D2HY33, G3NPG4, M3XK25, A0A0D9RSK2, F6XAI4, G3R155, G3TKN7, F6Q5B2, H0Z9H6, W5MP91, M3W2N8, H2P7P2, F6WSB6, A0A096N597, G3WTC4, I3M201, H2RB04, W5MP79, U3K0U5, H0WMI0, A0A0D9SG04, K7F4B5, F6WIQ6, G1TDD0, G1NEF1, F6XAJ6, H3AXV2, H0VK17	Uncharacterized protein	InterPro
LOC101865787	-3.24
LOC102114853	-3.24
LOC102121073	-3.23
LGR4	-3.22	UniProtKB	Q9BXB1, I3J4D1, I3J4D2, V8PG62, W5MH70, H2V4W1, H2V4W2, H2V4W0, T2M5P3, I3N9Z5, M3W316, G3SA82, G1M7I3, F7FZM1, F1P9F0, K7D663, H9GMQ4, H9F920, F7IMW1, A0A0A0MP87, H2R5I5, W8BKX5, G3RUY7, F6QK18, W5KF41, F1SGM5, G3SCK5, F6QK11, F7BII4, M3YIE3, H3BW89, G1SL01, A0A0D9QYT5, G1S847, F1NEL3, G3PS79, F1MLX5, G3WIW9, F7IQ73, K7F965, H3AVR4, H3CVJ5, H0VY85, W5PZW3, W5MH89, A0A096NAK9, H0X905, H2LN84, W5P…	Uncharacterized protein	Ensembl
LOC102120107	-3.22
TTC39A	-3.22	UniProtKB	Q5SRH9	Tetratricopeptide repeat protein 39A	UniProt
ARHGAP5	-3.21	UniProtKB	E2RED4, A0A0A0MSK6, H3ASM3, F7D700, H2ZWB1, G1QBA3, U3JTM7, F6X1M4, G3T9B0, Q13017, H2NKZ7, G3SDW0, K7GD67, G3VFU5, F6Q8Z8, E1BM23, G1TTL2, R0JPI8, G1MB50, G3UBM8, A0A096MNH2, G3QJG0, H0VAW4, M3X4J4, G3U0U8, M3XPP9, Q4G3Y9, F6XPA6, F1NG56, G1KB56, F6YB11, F7AID9, G3V360, F6YTW3, G1QSC8, H2R9D6, A0A0D9RT13, H0ZNT7, U3C9T9, D2H9M0, W5P8Y5, M3X5T2, I3NDQ5, F7AH39, H0XUY4, G1NIK0, F7GRE8	Uncharacterized protein	Ensembl
LOC101866696	-3.21
SEMA3C	-3.21	UniProtKB	Q99985, H0YWL5, H9EYS6, F6T8U8, I3MMM7, G3RJN2, K7GJB5, I3LBD8, G1KRJ8, F1P3L3, G1RXH4, Q5RE75, G1MCS9, G3VSX2, H0VNK9, E2R0R3, H9F9W0, G1SWH0, H0WNV2, F7H1L4, M3Z3L4, A0A096MZM1, U3I8D9, U3K7F6, F6VKW8, O42236, G1N265, G1PG15, F7FSG6, A7MB70, G3SN74, M3WV31, W5Q605, F7HNG1, H2PN17, H2QUU7, F7GWN2	Uncharacterized protein	Ensembl
STX19	-3.21	UniProtKB	M4ANF3, Q5RAL4, W5LSE9, F7HAX7, G3NUE0, H0W1L9, H0WJB2, G1PWY4, F7EXD2, G1K8L2, G1NS42, H2QMZ0, H3AGQ3, H3CED1, H0ZTE8, I3LSW1, H2RTR6, H2RTR7, W5NLL3, M3Z827, H2MLI6, I3NE75, A0A0D9R0V9, G3T2W2, Q8N4C7, G1U750, F1PQE2, U6CPH2, A0A087XJU2, W5NTI9, R0LLM7, U3KK39, I3J9A8, V8P9W2, F6UAH4, G3R0G3, K7GJK7, A0A096N2P2, G1QMZ1, E1C6K1, Q0VCI2	Uncharacterized protein	InterPro
C4H6orf141	-3.2
FKBP11	-3.2	UniProtKB	Q86SR8, F1MT51, K7F4K9, F7ISZ6, A0A0D9R1N6, Q9NYL4, H0YHM7, F7DVE0, G1TXI0, U3JBJ7, F7ISZ8, G3STT6, J3KN11, H0V0D3, G1LKI1, G1PHF4, I3MYE9, Q2YDL5, F8VU90, F1SPN1, G1S862, E9PAR0, H0ZYF1, H3BAR0, F8VXK0, F1P9T5, K7C718, F6WUJ4, K7CN37, U3CX06, K7CD44, F7BSX0, H2NH58, G1KHJ9, M3YTG3, H2Q5U1, A0A096N514, M3VU28, G1SXG8, W5QCM9, H0WUB4	Peptidyl-prolyl cis-trans isomerase	GOC
PROL1	-3.19	UniProtKB	H2PDI2, G1R817, F6UDQ3, H2QPL7, G3R6J8, A0A096NSK2, F7IIU0, Q99935	Uncharacterized protein	Ensembl
LOC102136712	-3.18
LMX1B	-3.17	UniProtKB	G1NUX7, Q6ISE0, F6VZX1, M3VWN9, M3YR06, F7AA53, V8PAV7, A0A0A9X6B9, B7ZLH2, U3IUB0, U3JHQ4, A0A0D9RMI6, W5PSU1, G1N909, H2QXW6, W8C6L1, G1S6I9, G1N905, A0A0C9RC88, F7CFV0, I2CX08, Q865U7, A0A096P215, W5LZK9, K7FC35, G3W872, F6UCT2, H0ZAN0, G3QM41, A0A034WVL6, D2H3X4, H9G5P8, I3NEG6, J9NU69, G3TF87, F6TAA3, G1U6Y9, W5LZJ6, F1NDZ5, F6PHK4, P53413, H3B946, W5U7C6, H2PTF0, F1RS26, Q60564, V8P9A4, W5L…	LIM homeobox transcription factor 1-beta	InterPro
LOC102144246	-3.17
PLA2G12A	-3.17	UniProtKB	F7I7H2, G1NUI0, K7BN83, H3A9M2, F1NEL7, H0WQG1, M3YB61, T2M5E8, G3VNY2, K7BH84, U3JVB3, Q9BZM1, A5D7L0, G1LD10, A0A0D9QVA4, F6UYG8, H2PE36, R0JUG2, K7F552, G1KMY2, E9G471, H2QQ09, G3QFJ3, H0V2M4, Q542Y6, H0Z147, F1S132, A0A096MLU3, W5P6I1, A0A0C4DGC6, A0A023I9D5, U3CSJ6, F7GYT0, M3W0A5, D6RBP5, G3SMG6, I3M9K3, F6WX38	Group XIIA secretory phospholipase A2	InterPro
CHDH	-3.16	UniProtKB	U3B4I5, M3W4E5, H0Z988, A0A096MTB4, H0XGF7, H0W931, G1N2T8, Q8NE62, U6DDM4, M3YZF8, G1PW75, C9JYW4, E2R4L5, A0A0B8RT34, G3WUY5, U3K1Q0, D2I1E1, W5Q313, G1KLE3, H3ASQ5, H2QMT1, F6SIV5, E1C003, A0A0D9RKN0, A0A024R301, G1R6J7, F6PXM9, U3J1B2, U3DZJ0, G1SWH6, K7F654, H2PAH4, I3LWR6, C9J7D8, G3TN63, T2M9M9, A0A075GLX0, F6VIS8, G3QGJ5, E1BES2, U3CE17, F7HXW4, F6PZX9, F1SH89	Choline dehydrogenase, isoform CRA_a	InterPro
LOC102132829	-3.16
MRAP2	-3.16	UniProtKB	A0A096NW80, D2I5L5, A6H7D6, G1U051, G3ULF4, G3W7B6, G1RQH8, H0VQ80, U3JJC6, H2PJQ2, R0M072, M3Y1Z0, G1P4B0, H2QTC5, Q96G30, F7HEG2, F7ADD2, K7EA08, G3QTP5, G1KCD9, I3MTF9, F6PPU5, F7BRV2, E1BS24, K7G4K3, I3LK27, M3W6I4, G1NLT6, J9JHQ8, H0X7H6, W5PV79	Uncharacterized protein	Ensembl
LOC102144644	-3.15
MEIS1	-3.15	UniProtKB	G3QRS0, F7HHR6, K7FQG5, W5QFD3, W5QFD4, G1P3H4, V8PIH0, H0XD63, G3UNF3, G3S4Y1, G1MBB5, F7BRG2, M3Y494, G3WVM8, H0VBR2, T2MJT1, F6V007, F6Z0Y6, G3TUR4, F7DAB3, U3INS8, F7EW36, A0A096N8U1, W5UD97, F6ZBX7, G1RFZ6, H0YVV1, Q53R57, M3W4G9, F7HDM8, H0YNY8, G1KAD1, O00470, V8PHE2, A4FUE0, F6UJJ2, F7H8I3, H2QI01, F1PZA9, H9FUJ8, U3KPR8, H2P607, G3SSE5, A0A0D9RQM5, F5GYS8, K7FQH9, U3KGS7, H3AA75, H3AA76,…	Uncharacterized protein	Ensembl
TPRN	-3.15	UniProtKB	F6XXL4, U3JSR6, G3W4K9, H2QY84, H9GJE2, F7EFJ8, K7E9Y5, A0A0D9RVF4, I3NEY6, M3YUI8, H2PU32, G1RD16, H0YX05, H0VFD1, G1MCC3, F7EU00, A0A096NWN7, R4GM41, U6DNY9, H9H0D0, F1NLR3, Q4KMQ1, G3R7R2, F6UB96, F1PYQ6, U3I3I8, F7G3I4, M3WXY7, K7FV33, W5NWW3, H3BLU1, H0Y273	Uncharacterized protein	Ensembl
LOC102138137	-3.14
LOC102141729	-3.14
PHOSPHO2	-3.14	UniProtKB	A0A096MMF1, D2H4C7, W5QEF6, H3B104, F7G0G3, G1QYG9, H9GNV8, U3KJI7, H2RC90, G1Q256, C9J4G2, H0W3R5, E1C2Z3, C9JZQ7, C9JD35, F1PVK9, G3TLQ8, H0XQH0, I3NE50, Q2KI06, M3Z6U5, F1S1V3, G1NRV2, F7HDN3, Q8TCD6, U3HYV2, A0A0D9SBD6, G3X0K1, M3WX35, H0ZBX8	Uncharacterized protein	GOC
TNFRSF12A	-3.14	UniProtKB	G1NVI5, E1BJH6, G1LFW0, G3QR16, F7BQN6, G1REF5, W5NRH8, F7DBW1, H2QAF0, Q9NP84, G3WYW1, G1TPB5, F6YYA4, I3MET2, H0VCF2, H0WYS6, F6W9A6, H2NPX0, B7SLY2, K7GI06, R4GAD6, G3TH99, M3X1W2, E2R8M4, M3YUX4, F6ZDH3	Fibroblast growth factor-inducible 14	Ensembl
ANXA8	-3.13	UniProtKB	K7C6Z8, O97529, Q95L54, A5A6L7, A0A087WTN9, K7GQD0, U6CT34, A0A075B765, H2NA99, M3WFP7, F1SEN1, G1T6W4, P13928, F7E419, F6QC34, E1C8K3, U3KNG8	Annexin	InterPro
EPHA7	-3.13	UniProtKB	V8PF82, U3JKV4, H9F0W4, H9FAC2, R0M1N5, W5PRL0, V8PEN2, G3TK41, X1WW11, F6XPG2, H0V191, T2MDF6, G3WUH1, H2PJU4, H0ZQ33, Q15375, F7D2V3, A0A096NGE6, U3DW98, G1NLJ3, M3YCD3, G1RSQ5, G1SDT6, G3QUG2, F1N780, D2HE60, U6DEA0, M3WPK6, F1RY15, E2R7J5, A0A0D9RXG4, G1P4L7, F7CWR4, G3TZE6, O42422, H2QTF1, F6Z105, H0WJP9, G1KC20	Receptor protein-tyrosine kinase	UniProt
GALNT5	-3.13	UniProtKB	Q7Z7M9, M3W7T6, F6W927, E1BKQ9, H2P7K9, H3DGE1, G1NJT8, H1A2M3, H9GD43, I3LCH7, G1QIY3, F6W893, W5KU99, G1SWQ5, G3QJ54, H2T0N7, E1C6J6, G1M739, G3SSK4, H3A7G2, U3ISQ4, A0A096NCC5, M3XMZ8, F1PV81, G3WVT3, G3WVT2, Q68VJ5, H0UV09, F6WTJ5, I3JQZ2, A0A0D9RTT0, H9FJR7, H2QIU5, W5PDL7, H0XFQ1, F6SIR5, G1P0E7, K7FM06, M4AA18, A0A087XEE6, W5MF16, F6QIB1, F7F8T7	Polypeptide N-acetylgalactosaminyltransferase	UniProt
LOC101864971	-3.13
LOC102123766	-3.13
SAMD13	-3.13	UniProtKB	Q5F3Q5	Uncharacterized protein	GO_Central
SYT7	-3.13	UniProtKB	F5H126, U3F0K3, H9GPK2, M3WJA6, F1N4J4, M3YRT3, G3WGW4, F7BXX8, G3T7P2, T2MIM6, F5H1N2, G1N011, I3LEZ0, O43581, A0A096MPA7, W5PUJ6, U3DN14, K7GA91, G3UCJ2, F6U816, H0Z838, V8PEJ9, F7EV46, A0A024R520, A0A0B2VMU8, G1THD6, H0XR59, G3RLD3, F6TK48, F1Q293, F5GZC2, F1Q291, F5H8G7, H2ND77, F7CKY5, U3IGK1, F5H6C1, H3AMZ7, G1MDY9, G3NPG7, F5GX00, U3KBM3, A0A0D9R290, G1P2Y3, G1QQN7, G3RUH1, H0VYJ1, H2R5D3,…	Synaptotagmin VII, isoform CRA_b	GOC
LOC102143228	-3.12
CGN	-3.11	UniProtKB	M3XX71, R9TE27, G1NX91, H2QZQ3, F1PLU8, W5QIM9, G1RGX0, Q9P2M7, F1ST04, I3M377, M3W1I4, H9FLK0, H2N5V4, G3WR59, F7IGJ1, G3WR58, B7NZD9, F1MYN2, H0WRH4, F7DA68, G1L190, G1MRB0, Q32WS6, Q32WS5, K7FDK8, B3EX63, G7MDK8, U3IQL3, A0A0D9S5T5, A9X1A5, H2ZXB3, B1MTG4, H1A461, A7YH32, B0KWC9, A0A096NE78, K7E6P7, B9EK46, G1U868, H0VWB6, F6UYF5, G3QY58, G3T8F1	Cingulin	Ensembl
LOC101865329	-3.11
LOC102133235	-3.11
RASAL1	-3.11	UniProtKB	F6RMG6, H2Q6X3, W5KEC1, A0A024RBK8, H9F498, G1QGZ7, H2NIR1, M3VUJ3, H0ZZ95, V8NIJ4, F1RKC3, A0A0D9S409, W5MNI6, W5PDD1, E1BPM0, H3A995, H0W394, M3XTY3, V8NJR9, I0FVP5, G1NWD2, A0A096NEB0, F1PST2, F6SGM0, G3WT39, G1LQJ3, O95294, U3EBN1, H9G9C5, F7I8U6, F7BI79, M4AL42, H3CH57, I3M3F9, F7BI70, G3TCJ4, G1N1K9, U3BZ83, G1TAQ3, U3I7H3, G3PDW4, F7DE58, A0A096N8L5, K7FCC2, A0A087YGP3, J9NV00, H0WPF0, F6S…	RAS protein activator like 1 (GAP1 like), isoform CRA_b	UniProt
SHC2	-3.11	UniProtKB	F7IB13, H0W2L0, F7IB34, G3WD51, H9GZV3, W5PFC4, H3AE88, H0YQQ5, U6D1I7, A0A0A0MXG0, F1N5N3, M3YF02, U3KHJ9, A0A034VF05, F1NYE2, F6QEQ2, F6QES0, G3TML4, H9GJ47, K7F6M1, P98077, G1PTQ4, K7EKS8, H2NWP1, I3N4V8, M3WML8, G1QIN8, F7D8A0, G3QFU8, H2QES0, K7F6M0, A0A0D9RKV3, U3I161, G1MVN6, K7ENB2, F6YIZ3, G1L7B3, K7F6L9, H0WQ91, A0A0A0MUC7	SHC-transforming protein 2	GOC
NOSTRIN	-3.1	UniProtKB	A0A0G2JNL9, D3DPB9, A0A0B2W661, F7E0K2, A0A096NZ99, F1S1W6, F6XKZ4, A0A0D9RS32, U3AVM6, H9FJU2, H3A3Y2, F7FT19, R4GDK8, G1LWJ8, F7FT15, H0WXA3, M3WDM9, F7BK92, G3TDC6, Q8IVI9, H0V6L5, F1MKH2, E9PDM0, J9P5D4, G3RPD3, F1PHX3, G1PM35, U3BDI4, W5P250, G1QXF6, M3XNS4, G3QVN9, F7ISL5, G1SPJ1, F7ISI3, F7ISL1, I3M9P3, V8P5P8, H2P7Q8, G3WV38, A0A0G2JPW3, G1K9A5, H2QIX5, L0BUD0, A0A0G2JM79, W5P247, Q2KJB5,…	Uncharacterized protein	Ensembl
LOC102146463	-3.09
UBL4A	-3.09	UniProtKB	I3L5Q3, G5E6J1, Q5R4T1, B7NZQ9, G1Q2Z5, P11441, B0KWT6, G1RVS6, F7AGG0, H2QZB1, W5P2A6, E2R0L3, F6RQ02, B1MTV8, G3TMV1, M3X745, G3RCF0, G1L0G5, F6Y119, C3PSZ9, B2KIK3, M3YE17, G3RYM4, Q5HY81, Q3SZ34, A0A096MZ29, I3NES4, F7GKS2, H0WD42, H0XQN6, F7BQ80, H2PX96	Uncharacterized protein	UniProt
FRAT2	-3.08	UniProtKB	G3X1T2, F7GHD6, H2Q2C6, A0A096P5Y0, H0XS45, M3Z030, O75474, H0WCQ4, F7AUX6, G3N174, W5PZV0	Uncharacterized protein	Ensembl
MPZL2	-3.08	UniProtKB	U3ITP4, G1TAB1, H0X0C3, K7GG14, F7HDK2, F1SAK9, H9Z450, A0A096NXM1, B9ELR4, H3BFU8, Q5EAB0, U6DF43, V6F7S3, H2Q4V8, H2NFG5, H0UW70, A0A0D9S3K1, F6SRY0, F6X8M7, G1M3H9, W5PG85, V8N3D1, G3UQU7, G3WLL7, F7D6J6, G1MX74, M3WFQ7, H9GCI5, B5XAW9, G3RTC2, H0YPN7, M3XGH4, G1PBM9, U3JTW8, M3XZD0, F7H8W2, Q5R804, E1C6A5, O60487, G1R704, I3MN30, G3T1W8, E2RGD9	Uncharacterized protein	Ensembl
RASEF	-3.08	UniProtKB	A7Z031, E2RKF3, H0V4G3, G1PM20, U3CY70, G3VC67, A0A096P1V3, F7H682, G1LSD0, U3J2U0, Q8IZ41, H0YYE2, G1SFM8, W5U6Q2, K7GIC2, H2PSH7, F6UEM5, U3JLV6, F1P2F8, W5PH24, M3VYG3, I3M420, A0A0D9R5K6, G1QSQ1, A0A0B2V394, M3YNR7, G3T5U8, F6UKK4, B5XCS8, G1KAE8, H2QXD9, H0X7L3, F7DUB1, F6ZIY8, F1S3U6, G3QUV5, T2MAA7, F7H690, H3ARQ0, F7B263	Uncharacterized protein	UniProt
LOC102124065	-3.07
ESM1	-3.06	UniProtKB	G1MXY1, V9XZL8, H2QQW3, D2HXE3, E2RJ30, W5PDW1, I3MXC4, F6TJM1, H2PFJ8, F7EV13, V9XU60, G3QZZ2, H0YW47, V9XWZ5, H0VBH2, Q9LJG3, H3A5C7, A5D7V3, V8PE21, A0A096N6E6, K7FMY9, M0R154, F7HXB8, A0A024QZR4, R4GLH0, A0A0D9RVM3, V9XXX7, V9XWZ9, M3X172, H2R5K2, H0Y010, G1T1L2, F7HUC0, G1KR58, G1QG59, Q9NQ30, C1JFI3, G3TH76, F6RBB9, U3IAH0, M3YS96, C1BM60, U3K8C2, F6RH45, G1QKA5, U6DUD2	Endothelial cell-specific molecule 1, isoform CRA_a	InterPro
LOC101926103	-3.06
LOC102119121	-3.05
LOC102122103	-3.05
GALNT12	-3.04	UniProtKB	K7GGT6, H9FM24, W5PN17, G1TB61, W5UF07, G1KAJ1, H0VLE2, V8PCN5, H3ATT4, F1SSE9, G1LD13, G3WYU8, M3Y546, H2PSV7, A0A0D9RF80, G3WYU9, F6X0N1, F7F4X6, G1S586, H0ZDW4, Q8IXK2, I3NFK4, H9F4F6, F6T058, H0WII8, F1PSA3, A0A096P120, Q68VJ1, A6QLX6, H2R6I6, G3X6R0, U3IXL8, F6X641, M3WAB2, G3TN03, G1NYB0, F7BMV2, G1N5V3, U3JRL4, G3QSN2	Polypeptide N-acetylgalactosaminyltransferase	UniProt
GOLM1	-3.04	UniProtKB	U3JLQ6, E1BLA8, G3T950, F7ATS5, G1SGL2, G3W1F4, H0V1S6, G1LBT0, H2QXE7, U3J862, E2RLA5, H2PSJ9, C6H109, Q8NBJ4, H0YXU7, M3WCA0, G1P668, M3XSW4, G1K8H1, E1C3N9, A0A096P1W7, H0WMS3, K7F6X6, F7ELM3, G1QUE7, G3R9T4, W5PG72	Uncharacterized protein	Ensembl
LOC101925967	-3.03
LOC102116767	-3.03
SLC26A9	-3.03	UniProtKB	H0VET1, I3MA87, Q7LBE3, U3IXW8, H1A4H4, G3STX1, H2R868, E1B9J2, W5P3Z7, A0A096N7V2, W5K1I4, G3R9Q3, A0A0D9RQI9, S4RN01, H0X2S4, F7H1H6, F7GM94, G1M2M7, K7F5N2, H2N3Z0, G1P300, K7F5N4, G1RWZ6, F7GB82, U3JCV5, G1MWG1, G1RWZ9, E1C2B7, F6TXG3, G3PAD1, G3S0M3, E2RJT1, G3WVG6, H9GJ79, F7GTT1, F7AUY8, M3YKN4, I3KIN0, W5MXZ7, G1TX36, M3W6E5	Solute carrier family 26 member 9	InterPro
ARHGEF28	-3.02	UniProtKB	Q8N1W1, F7B744, G3WNK9, U3DFA0, H0V8C2, G3RIR6, H2L9N1, W5UDW2, F7F1G4, M3WJ16, H2PFV0, F6RSC0, A0A096N7Y2, F1P9A5, H0WNB3, F6SPS8, W5P420, H2QR28, F7B776, G1N0A3, G3T733, K7G5Q3, K7G5G1, G3T729, G3ULM6, G1P334, G3UV91, U3IL26, M3Y379, G1SDQ4, I3LSI2, H0Z6A7, G3NKC5, G3QNT1, G3WNL0, G1L0U9, F7FXP7, F7BQ60, A0A0D9RSI9, I3MCU1, F6XA24, U3K6H7, G1QY11	Uncharacterized protein	InterPro
ATP8	-3.02	UniProtKB	D1YUE2, F1AWH9, A0ZPV5, A0A088FP77, C9D8C4, B7XBM6, B6DCH1, H6UCF2, H6WCB4, K0A2D4, L7UZI9, A0A075CNC7, U3QY98, A0A0A7DF76, D7PEP3, Q2TRU6, A0ZPU2, C9D8D7, I2DA67, Q2TRV6, A0A088FP89, I7DPZ0, Q6L8D9, Q2TRV1, C7SFN2, Q199H1, H6WCA1, A0A0A0VB26, B5B728, R4I4C1, I6TJF9, I6ZED1, H6UCH8, Q6R699, F1AWF4, K0A2F7, E9P2C5, A0A0A7DET5, A0ZPS9, A0A0A7DF56, F1AWG6, B6DCF8, R9QAX8, Q2TRX1, H6UCG5, A0A087ZMP6,…	ATP synthase protein 8	InterPro
DNER	-3.02	UniProtKB	K7CNY4, G3X1X1, F1N9F4, W5QHE6, J9PAK8, A0A034VPW5, G1KEJ0, F1N5P0, M3WGD2, F6TEZ8, A0A0D9R3X8, A0A096N0D5, M3XYS3, G3UHR4, G1RT85, G3RPP1, F7G2V2, U3EET5, G3RFZ4, H2R623, G1PGE6, G3T8C3, H3AAS3, F1SMZ4, G1N2S9, U3JWV8, K7F928, H0VJG2, F7G2Y0, G1TC78, F6V324, U3CQ75, H0ZD99, F6U1A2, F1PUS4, V8P7B6, Q8NFT8, F7DJB8, H0WG36, U3C4U5, H2P8U4, G1MDV7, U3IMV4, F6UXR7, T2M937	Delta and Notch-like epidermal growth factor-related receptor	InterPro
LOC102117062	-3.02
TMEM141	-3.02	UniProtKB	Q96I45, K7AWP6, U3FKG0, Q3SZU9, K7CL76	Transmembrane protein 141	UniProt
LOC101865901	-3.01
LOC101925367	-3.01
LOC102121441	-3.01
LOC102128298	-3.01
TYRO3	-3.01	UniProtKB	H0VFP8, A0A096NTP8, H2Q984, F1SSV9, K7AIT8, H2ZWZ0, A0A060KPZ8, A0A0D9R644, Q8N6J3, G1MDZ8, Q06418, W8B7U9, F6YC68, G3UUG2, G1NFK2, F1N5L4, G3WY76, G3WY77, J9JHA3, H0ZKX9, F7EVS7, G3QEU1, H2RGQ2, I3MPL7, H9ESJ0, V8P0B0, H0YNK6, H0X7W5, G1QU90, Q98949, G1PU03, M3WH99, M3YC28, F1PG91, K7GA13, F1NLR2, F7IGB6, H3BPR7, W5QGP6, G3TJK5, F7IGC0, G1SQL2, F7DKP9, F6T717, G1KPQ5, U3ISR3, F7FW59, U3JU80, U3D…	TYRO3 protein tyrosine kinase	UniProt
ANO1	-3	UniProtKB	I3N0H6, U3JF86, W8BPA8, W5LNF7, E9PS90, G3RCT0, H0XF50, H0YDD9, V5G8X2, K7FTC6, H9H972, A0A0D9RAE0, A0A034VTW3, W8C104, F6U8A5, H9FJ80, G3UBY0, A0A034V776, H3AL09, U3I9U5, A0A034VUV9, G1RHL3, F6UMG7, A0A034VVM6, Q8NCT7, V8P5X3, M3W6E9, V8P061, V5FSV2, Q5XXA6, W8BBX0, F6ZFF7, M3XZZ3, G3UA38, G1PTH9, H0VI79, E1BGK6, W8BZ23, F1PQF9, V5H447, A0A096NYE7, G1SJA2, F6YXH0, G1NC89, H9FHM4, E9PNA7, W8B9K6,…	Anoctamin	UniProt
PRDX2	-2.99	UniProtKB	A0A034WYF0, F1SDX9, F7GD18, H0W316, K7EUA1, H2ZSZ9, G3T1Z8, C1C365, I3NC51, G0T333, G1M0V1, A0A0B2UZ73, F7I3C2, M3VUU2, C8BKC5, D3PHL4, K7FZC0, F6QUI0, P32119, C1BVL8, H9G7G6, H2QFG9, G3WSH0, F1PCG4, F7I5P9, W8AW14, P52552, Q8K3U7, A6NIW5, G3GBS3, Q5RC63, G1RQM6, G1PL54, M3XZQ5, G3S156, F7IDF0, Q9BGI3, C1BN40, F6U5B4, C1C2D2, U6CZ47, A0A024R7F2, Q2PFZ3, A0A0D9R2M0, A0A0C9QC20, F7BFT1	Peroxiredoxin 2, isoform CRA_d	InterPro
RNASE4	-2.99	UniProtKB	F7FYP1, A0A096NNL9, F1PPZ2, F7IRG2, H0WX00, W5PTS4, F6ZXU1, G1MK35, Q58DP6, M3X9F2, P15468, P34096, P15467, M3Z3V5, F7GKW9, Q5NVS4, G3VW07, Q8HZQ0, G1T4J9, F6QVB3, I3LDZ2, A0A0D9RVS4, I3MZF6	Uncharacterized protein	InterPro
TBKBP1	-2.99	UniProtKB	H9F820, H9EZA5, U3D3M6, A7MCY6, E6ZI15, E6ZI16, U3CVK9	TANK-binding kinase 1-binding protein 1	UniProt
P4HB	-2.98	UniProtKB	W5UTY0, Q2HWU2, Q5R5B6, H0Y3Z3, F1PL97, M3XCN6, H7BZ94, A0A024R8S5, V8P8K8, P05307, Q96C96, T2MHU7, G1N1E5, H2NV27, G3WBV2, F1N9H3, M3X1Y4, Q8R4U2, G1Q0H7, A0A061SM56, F6WTQ0, H9FV20, H0VL04, U3DPX6, G3SBE9, G1RH55, G3UP12, I3NI03, P07237, G1KKB8, A0A061SGA3, G2HF11, A6H7J6, G9BHX0, I3L3U6, I3L312, P21195, M3ZA61, U3EQL0, W5Q9H2, U3J3L7, A0A0D9S4M6, I3L1Y5, I3L3P5, P09102, B3KTQ9, I3NBW9, I3L514,…	Protein disulfide-isomerase	UniProt
TMEM56	-2.98	UniProtKB	F6TDT4, H0UXB2, A0A0D9S6P6, C9J6J2, I3MBU2, G1RK96, A0A096NYV9, F7BRR3, M3WTX6, H0Z5B8, E2RSK2, W5Q7V0, C9JJM2, H2PZF9, G3VYI9, Q96MV1, H2N6P9, U3ELV5, G3S2Y8, F1NSV0, F6SMU8	Uncharacterized protein	UniProt
WDR16	-2.98
SBDS	-2.97	UniProtKB	H0VPJ6, A0A075HXU4, A0A075HA43, G3T2G5, A0A075H5I3, B5X8W4, A0A075HA00, B5XAR7, H2QUN6, A0A075G3K0, Q4RFU2, E2R2W6, C1BM97, C1BF69, F6VQ59, Q9Y3A5, M3YXM7, A0A075GQM0, V5H0P4, K7G7Z3, G3W954, A0A075I850, A0A061R5D8, G1PN53, W5PLQ9, B5XEK1, G3UPX1, C1BVJ5, C3KK45, U6D685, A0A034WV78, Q5ZIY4, A0A075GI15, F6QRM2, A0A075I7S1, I3MXV0, G1MTD3, A0A075FMM6, G3S5N0, T2M2Q9, Q5RAZ2, A0A075IC62, G7MP28, D2H…	Ribosome maturation protein SBDS	InterPro
TMEM54	-2.97	UniProtKB	U3BF22, Q969K7, V8P0W5, K7A719, Q3ZCD2, I2CY87, F7BVY9	Uncharacterized protein	UniProt
LOC102123836	-2.96
PCDHB8	-2.96	UniProtKB	G3N152, G1SA24, Q5DRC6, M3VYW6, H9FEB7, H2PGV3, Q9UN66, H2RFE0, A0A0D9RJA9	Uncharacterized protein	InterPro
POLR2I	-2.96	UniProtKB	G1RLW6, F6U7C7, H0VKN8, M3X8K0, T2MGF5, P36954, F1MZ35, Q4S925, M3Y2V4, Q32P73, H3AMM8, K7EKS1, G3RHC8, K7FXT0, K7ENX4, K7EK49, G1PKA1, A0A0A0MV17, H2NYJ8, S8GNR0, V8NE69, F6ZTX6, E2QYJ4, U3JUL2, G3TFB9, H0XWT9, F7IC64, A0A0D9QW72, G1TAL1, D2HFU4, H9L0B5, W5P5E8, I3MDG9, F7A420, G1N8X3, P60899, H2QG57	DNA-directed RNA polymerase subunit	InterPro
TNFRSF19	-2.96	UniProtKB	G1KBH6, A0A096N9Q0, F7I198, F7EKB8, G3R1H4, U3IXY5, W5PV46, E2RFT9, M3WC77, K7GL18, I3MFQ1, F6TZV5, K7FLX3, G1M6B0, F7AL23, M3XNH6, Q9NS68, G1T1Y6, G3T421, A1XGV6, A0A024RDM5, H0ZMF9, F6YX32, H0VKK7, F6PLU5, G3VVZ8, H2NJD9, Q2HJB7, H0WPH0, H2Q7A4, G1NQE6, U3K217, G1P5F3	Tumor necrosis factor receptor superfamily, member 19, isoform CRA_b	Ensembl
LOC101926708	-2.95
LONRF3	-2.95	UniProtKB	G1RXQ7, H2PWL0, A0A0C9RDX7, A0A087XH44, U3IYT0, F7D4L2, H0Y7Q8, W5Q4Y2, I3MP15, I3KFJ6, H0VM40, U3JFZ8, F7GTU1, T2MCF6, F7GTU9, H9G764, A0A096NC58, F6WZY3, K7GS78, B3KUN7, F6S755, K7GLC4, Q8HXH0, H3AXB4, H3AXB3, H9FJF5, K7GRY6, H2LZL7, F1RU80, H2LZL9, G3VK51, V8NDA1, K7GGV6, H0YYM9, G3TM11, G1TWC6, F6TAJ9, M3W8L1, H0X517, F1NNQ7, G3RCU8, G1NPL4, G1N732, F7D4G9, H2LZM0, H2LZM1, W5LM05, H1A057, G3X…	Uncharacterized protein	InterPro
SPR	-2.95	UniProtKB	Q17QK8, G1RHC4, G3QSC9, Q8SWR3, A0A096NDJ7, M3Y805, H0X838, B0F4F0, Q8R536, H2P5V3, B0F4F1, B0F4F2, G3W913, Q9UEC5, G1NKT4, G1SE67, H0W0K4, A0A0B2UWW7, K7B3E1, U3KD86, P35270, F7BPB8, A0A0C9RNW5, G1PR63, T2MGM6, E3W2X4, H2QI40, Q29I83, F6PUH4, F6YUE9, G1MAW6, F1PTP2, H9G4I3, E3W2Z2, B0F4E9, G5E6U0, U3IGU1, W5PPU0, H9F8L0, I3MPM7, E1C4L3, B0F4E8, A0A0D9RS19, M3WWH9, F1SLF0	Uncharacterized protein	InterPro
ZNF185	-2.94	UniProtKB	F6XJG2, F6S193, F1S2C9, A0A096MR06, V8NZ06, K7ETA8, U3KA68, G3RLK7, A0A0D9R3R9, F7H8X4, H0WRS8, F7DVA6, K7E213, B3KPM4, H2QZL9, M3YKC1, G3WSC9, W5PDY8, M3W334, H0VU50, H0Z4Y0, G1PTK5, G1RUY5, E1BP80, F1Q146, U3IZL1, F6WCJ1, Q4SJS4, I3MB42, H0Y704, O15231, G1L0F0, G3SQA3, F7CB37, H9GMP2	Uncharacterized protein	Ensembl
LOC102137002	-2.93
LOC102138597	-2.93
LOC102142795	-2.93
RASSF7	-2.93	UniProtKB	F1RYX2, F7CAK8, Q02833, I3M118, F6X044, H2NCA3, G3RHF9, F7F519, A0A0D9RF14, J9P3E1, F6ZAM6, F6XVC3, U3KCA5, G1KQI9, G1RA93, A0A024RCE4, W5PAN2, W5PAN0, A0A0G2JMW4, H9G049, H2Q2V2, F7CAN2, G3U6D8, K7G8Q5, H0ZHV6, H0VUX7, F7IDH1, F7CAN9, G1LVK3, U3IXX0, H9H6H0, H0ZHV2, E1BTN3, M3YBQ3, E2R4K6, H3BFT1, A0A0G2JLR5, G3S987, H0Y211, A0A096NPV0, F6Z4K5, E9PM39, Q1JQC0, M3W7Z8, J9P5H6, A6N8M4	Ras association (RalGDS/AF-6) domain family 7, isoform CRA_a	InterPro
HSPA2	-2.92	UniProtKB	E2QX84, G7MYA4, R0LC19, I3N733, A0ZT12, H2NLI5, W5NSB0, P34933, F6ZXI7, A0PA14, M3W8G1, P86204, F6VLQ4, F6V652, K7DEW5, G3W9P3, H0XX81, A7E3Q2, H0ZRS0, D2GYI3, U3KKN1, G1NR17, S4VG93, U3BYK3, P54652, F1SA70, G1SBT8, G1T1V9, G1KRK2, M3Z7F7, Q9TUG3, U3DHI7, A0A024R6B5, A0A0D9SDX8	Heat shock 70kDa protein 2, isoform CRA_a	UniProt
LOC101865860	-2.92
NMRK1	-2.92	UniProtKB	Q9NWW6, F7IMV7, F7D3V5, F7D3W2, B3KN26, A0A060KTJ1	Nicotinamide riboside kinase 1	UniProt
LOC102138973	-2.91
LIMCH1	-2.9	UniProtKB	F1NIU4, M3W7R0, G3QMI3, U3F1S4, E7EPK0, F7HJG7, U3IIS4, F7FZI8, U3D0K6, F6YGL2, F7FZE3, G1M370, G3TT20, V8NIT1, F7AG66, H2R3J9, H0WNC3, H0ZE75, G3T2J5, A0A096MTU8, G3S3D9, E1BC91, G3S6F2, G1T9Q0, F7GS20, F7A1R8, U3IBI7, F7GRY0, F7FZF5, A0A0D9RWY7, U3DS21, K7FAE8, F7HP10, G1NHX0, H0Y8P3, F6Z3I4, D6RD46, E9PDJ9, F1PHJ3, I0FQ40, F1PHJ6, I2CTG1, G3TW41, U3DR65, H2PD66, G5EA03, F7CPN4, I2CTY2, G1S5Y6,…	Uncharacterized protein	InterPro
LOC102117825	-2.9
ATP9A	-2.89	UniProtKB	G3RKC7, H0ZE54, K7GQ80, K7GKR3, F6R7F8, J9NYA7, U3KFB3, H2MNC8, A5GFS1, F7BLU9, A0A087X6B7, F6X5R7, G1NAQ5, F1PGM6, H2P2B3, H0X9U3, U3FKM4, U3BDB5, H3AYJ2, K7GQ24, G3X101, Q2I6Y3, G1R5S8, G1P8E4, H9F9T8, A8JFE2, I3MVA3, G1TFW1, K7FQK0, F7EQP6, Q2NLD0, W5PY78, U3IG94, H0VM52, F6R7D6, U6DGP2, F1NUR8, H2QKK9, F6QCC6, V8NWR6, K7FQJ0, A0A0A0MR22, E1BN81, H3D4J3, W5M362, H2SV77, R0MIP3, H2SV78, M3XFQ5,…	Phospholipid-transporting ATPase	InterPro
LOC102120372	-2.89
S100A16	-2.89	UniProtKB	F2Z5M4, F7C5Z7, F7AMA4, H0V3T4, M3YAB8, U3KBZ3, H9Z3V3, M3W930, U3IR63, H2R2M4, W5NRC1, R4GJQ6, G1RHH0, H0XNB6, H9H0S1, K7GQD4, G3S962, G3W725, A0A0D9S5N6, G3SQW7, F6SL37, E2RP76, I3LX38, Q96FQ6, H2N5N8, D2HJR2, A0A096N412, Q0VCM0	Uncharacterized protein	InterPro
THTPA	-2.89	UniProtKB	G1RYK5, I3M000, A0A0D9RTS9, G1DFN0, E2R1U9, G1STM4, H2NMH6, G9KTA7, G3WSE4, H2Q810, W5QDB1, H9GDD1, F7IH66, F6XKY8, A0A096NX37, Q9BU02, H0UUJ8, F7GJE5, G3SRW8, G1ME06, G1PVA6, U3EXM2, Q8MKF1, F7DU01, H0WZ44, G3RFP6, M3WG99, Q9BGW0, F1SS41	Thiamine-triphosphatase	Ensembl
ARMCX2	-2.88	UniProtKB	K7GNG5, K7GSI7, K7GMH9, K7GQM3, Q7L311, K7GT27, F1RYG8	Uncharacterized protein	AgBase
LOC101865993	-2.88
LOC102117622	-2.88
COBL	-2.87	UniProtKB	H2PM42, I3N055, U6D2T8, F6YZW6, I2CUC5, F6VKV4, M3WD39, W5PVU7, M3Z383, G3R270, F6UZ22, F1PF42, V5GTC8, J3KR05, O75128, G1N469, G1TCG6, G3WMW2, F6PSB2, F7ILM1, G3WMW3, V8P800, H7C1N2, H0X3L5, H9FRW2, G1KHX0, H2QUK9, F1SF12, A0A0D9RU13, G1RAK6, K7F949, G1PM50, I3MY18, A0A096NAZ7, K7EU96, U3E0E1, A0JNG1, U3KMY8, U3EB06, G3SSN3, H0ZCA8, U3IAC7, U3JYK4, H0UYV5, F6X284, G1LMP3, F6YDV4	Uncharacterized protein	Ensembl
HSD17B14	-2.87	UniProtKB	H2ZTH5, G3VQN9, G3QTY1, U3AUE4, M3W7L9, I3M436, U3F094, A0A0D9S2Z9, K7E8M7, K7BFU6, G3VQP0, F1RL81, M0R2R3, H2QGS8, H0XLJ6, F6ZG56, F7EWM6, A2VDY5, M0R147, G1QXI6, H2NZI5, E2RRR2, M0QY35, M3XWS7, H0VBP3, G1M824, A0A0A9XRC1, K7F5F0, W5PRQ8, Q9MYP6, F6TD98, G3SMG4, G1U0T4, Q9BPX1, G3S595	17-beta-hydroxysteroid dehydrogenase 14	InterPro
MCFD2	-2.87	UniProtKB	H0YWM7, M3YKU4, I3M2R1, F6ZFJ6, U3IJW5, D3PHX7, K7G8H4, G3T0T8, G1P1V9, I3LV84, H9G1J3, A0A0D9RM47, F6PZ29, U3KEH7, G3VZ96, H2P6B1, W5P677, H3AVQ5, H2QHV6, G1KCN9, J9NWC4, Q5ZJB5, A0A0C9QYL6, V8P0Y5, K7AS02, Q8NI22, A0A096NW27, Q3MHJ4, F6VJ54, D3PGR7, B5X5V4, C1C427, H0X064, K7GQY4, F7H589, A6QQ22, A0A034WLJ0, Q5R8Z6, A0A0A0MXQ5, W8C4M2, G1STS4, F6VJQ4, G1ND62, M3WB08, C1BLQ1, I3LVM6, G1LHM4, F7D…	Multiple coagulation factor deficiency protein 2-like protein	InterPro
AGL	-2.86	UniProtKB	G1TS42, K7G8P8, M3YLH2, C0STS9, U3FJ79, M3X112, Q8HXA7, P35573, H0WSE9, G3SM26, F6TE92, H2PZG8, F1S557, W5UKW9, W5Q8M3, F7EAR4, P35574, H0Z4Q4, H3AL55, A0A096N6Q6, H3AL56, H0XMV7, V8PGB5, F7EAR8, F6YVZ9, H0VJR7, H2N6N7, T2MGL3, U3DB08, U3J1L9, A0A0B2VE34, F1MHT1, A8BQB4, U3JI98, U3FGG2, G1N5J6, F6QIG5, A0A0D6QIV1, H9EVF1, G3SJU0, H9KVJ6, Q2PQH8, G1RLT1, G1KCM2, A0A0B2V6Z8, G1PTA9, F1PBL3, C0STT0,…	Uncharacterized protein	InterPro
NR2F6	-2.86	UniProtKB	U3I5Y4, H2QFQ4, H9FAC6, H9EZC5, G1PPX6, F7I2W1, F6U7Y5, G1LV17, H3ARB2, M3YWV2, F1D8R3, K7G5C4, G3TW04, U3I5Y7, M3VVT5, F6Z4E7, P10588, E2R3D0, A0A0D9R023, K7DYT8, U3DJ91, H2NXZ7, M0R175, B6ZGU2, A0A0A0MUF7, H2RH53, U3I5X9, U3I5X6, I2CWM6, H0XJ96, W5Q874, K7G5B2, H1A3E7, F7FUW7, U3K3A8, U3I5X3, F1N3S3, F1S962, H0W9R5, G3SZV3, I3NFL0, F7I7M8, F7I7M5	Uncharacterized protein	Ensembl
TGFB3	-2.86	UniProtKB	P15203, H2Q8N5, A6QP91, F7HDK4, H3BAJ1, H0ZPS5, G1MJ58, F1NRQ9, H0X0G9, M3WKA2, Q6TV14, Q6TV15, Q6TV16, G1KTG2, G1T192, P16047, A0A0D9RHV6, F1PR85, V9NI39, G3QGK3, F7DR45, G3TQ65, F7IQT4, G3WTJ4, K7GIR5, G1S3M8, F6XNU4, M3YCD0, U3IXL0, W5NVG0, F6VL66, G1PMR3, V8PB41, Q5MPQ0, A5YM40, G9G8F0, G1NJH0, Q30DP2, A0A096NS60, U6D6A1, U3JV88, K7GSJ9, P10600, H2NLV1, F6Q651, I3ND79, G3UBH9	Uncharacterized protein	Ensembl
EFS	-2.85	UniProtKB	H2Q807, A6H7H9, F7G472, F1S9E1, M3X1T8, G3WQ05, M3Y5T7, W5QDG5, I3M0M6, F7BRM6, H9GB61, F1PFU2, H2NKS9, G3T701, F7I4G9, A0A096NX12, F4I6Z9, G1PWC3, F6VQI6, G1RYE2, G3RLP9, G1MEI8, O43281, A0A0D3D1C9, G1TGQ5, H0WAV5	Uncharacterized protein	Ensembl
KREMEN1	-2.85	UniProtKB	F6UAY1, F1PCF1, Q96MU8, G1QQB8, M3W1U0, F1MRR1, U3DHG7, F7FIC8, G1SXR3, F6TGG2, G3QID4, A0A096NRI8, H9H6Q3, H0ZC96, H2R709, F1NBA7, U3K0U1, H0WZM1, U3ITI5, F1RFJ0, W5NZ11, M3YPX9, A0A0D9RBW9, H2P3Y4, G1LP87, I2CXR0, G1PJL4, G3T2L2, H0VK36, F7FX81	Uncharacterized protein	InterPro
LOC102129109	-2.85
LOC102141388	-2.85
ND2	-2.85	UniProtKB	A0A0A7DF84, S5LV63, A1XBL5, S5TZG9, A0ZPV2, A1XBL7, A1XBL8, A1XBL9, V5WDL7, A0A059TKT6, A1XBM0, S5G9G1, A1XBM1, J7HTR8, J9WM71, J7FRL0, A0A059TKT2, K7DXM9, S5TZH7, J9WM78, Q8HBJ6, S5G9G6, D7PEP0, R9QAZ6, H6UCE9, A0A059TKU5, Q6R689, I2DA64, V5WDM8, Q8HBK8, B5B725, A0A0A7DEU7, A0ZPT9, A0A0A7DEU1, R9QAY3, S5G9D3, H6UCH5, D2K9Y6, A0A059TKV2, A0ZPS6, S5G9E9, S5G9E3, B6DCF5, S5G9E1, C0M163, A0A087ZMP4,…	NADH-ubiquinone oxidoreductase chain 2	UniProt
ENPP1	-2.84	UniProtKB	B3EX52, W5PXR1, G1RWM9, W5PXR3, C1FXT3, F7ALR7, G1NKE2, K7FF53, B1MTF2, F1PJP0, F6S0K3, A9X179, H0ZN20, F7BDR8, F7BIY1, H2PKC2, H0VSW3, T2MGK5, B0KWA0, H2R6Y1, F7HLD6, G3T665, G3W9K2, P22413, K7FF46, M3YTA5, A0A0B8S088, H0XAK5, F7B912, U3KB63, M3XBL3, F1S3P5, B2KI46, U6DAN2, A0A0D9RVT2, U3DI79, U3IPS2, K7EV05, F7BV36, Q0NZZ2, B7NZB8, F7BSJ2, G3R6E2, F6SKV9, G1LVG7, G1TK63, G1PVJ0, F7GPN9, F1NC25,…	Ectonucleotide pyrophosphatase/phosphodiesterase 1	InterPro
FBP1	-2.84	UniProtKB	M3WB78, W0D7W4, F9X7Z8, G1TH72, A0A0D4U2Y9, A0A0D4U5B5, A0A0D4W3X9, A0A0D9R244, F7EJG8, A0A0D4VY12, W6JMA8, A0A0D4UEB9, A0A0D4VC47, A0A0D4VR05, A0A0D4VUX7, Q5VZC3, A0A0D4TN94, A0A023ZL05, A0A0D4VYK9, A0A0D4UX61, Q9XFL3, F6QGI8, A0A0D4V7A0, A7A1Q3, A0A096P259, K7F7F0, A0A034V1G5, G1PP21, A0A0D4VTW6, A0A0D4US06, F6YGC3, A0A0C5ID44, A0A096P260, A0A0D4VDC8, A0A0D4VEU3, A0A0D4UNF9, A0A0D4TRS2, A0A0D4V…	Fbp1p	InterPro
IMPA2	-2.84	UniProtKB	M3WPZ6, H2R6V5, F7AFG8, I3LIH2, H2NVT9, F7D8V3, A0A0C9RIC7, G3R6W1, H0UW75, W8BS60, K7G1U8, Q6PIP6, E1BPR2, U3DAH9, A0A096ND98, F6SMH6, H0WTJ2, H0ZHB9, G3VL83, W5NUG5, C1L6Q1, F1P0Q6, U3JVA6, C1LK26, C1LK27, U3IX38, H2QE97, F7D8X6, H2ZXZ2, U6CPM8, F1PPN3, G1RCD0, A0A0A9YGQ7, F4JL11, F6R2H7, G3UKF7, K7ELF8, G1M214, F7CB67, I3MJ38, F7BN86, H9FAX4, G1M219, K7EIH6, M3XZI3, K7EL65, A0A0D9RY82, G1N9L6,…	Inositol monophosphatase 2	InterPro
LOC101925669	-2.84
BTC	-2.83	UniProtKB	H2PDL8, F1PSQ7, H0XJ60, M3XG16, K7FMY3, A0A096MX40, F7B288, A2VE27, G1M715, F7H290, F7B8P3, G3TGY5, M3YCG4, W5Q0K4, U3HYU6, H0Y8Q5, H2QPP5, P35070, Q9TTC5, I3MM46, G1SJ89, F1RYW5, G3RD79, H0YU70, Q64EU6, G1N045, H0WCG8, U3JDX4, F7EI84	Uncharacterized protein	Ensembl
GJB2	-2.83	UniProtKB	A0A0D9SB80, A0A096NEK9, G3SU51, U3HYU0, H0X5A6, H2NJC5, F7HZW5, H3AAP6, H9U1J4, U3KKB2, G1SYP9, M3W6U0, A2VE67, G3W125, Q8MIT8, G1NQF9, I3N748, A8DU55, P46691, G1PT05, G1KAE2, H0ZM34, H2RAA6, V5Q007, T1W1N3, Q8MIT9, Q7JGL3, G1M660, F6WYM7, W8FX79, J9NXR5, F7ETY3, F6TM65, Q8MHW5, P29033, G3U6Y6	Gap junction protein	Ensembl
USP54	-2.83	UniProtKB	X6RGF2, H7C1E9, V8N8E4, G1PL63, H9GFV5, H2Q238, G1MEM5, G1MEM2, H0VBE2, G3T7M5, H2NAJ5, W5PD53, K7GBS1, H9FQJ9, V8NFN5, E7BK35, H0WK75, F6WQQ8, F7HXB1, G3R6Y1, U3D092, G1S441, F6Q6Q7, I3N6Q4, F6ZVA6, E1BU81, E1BC75, G3VQS8, U3JX96, I3KFT1, A0A0D9R8W4, I3KFT2, F7HXC0, Q70EL1, G1U044, F1PG31, A0A096P4N0, U3IEM2, X6RH50, T2MAC6, F7GS80, M3WJD1, E6ZHQ9, K7GBR4, F1SU56, E2R5P6, M3XWN9, G3S6A2	Uncharacterized protein	InterPro
LOC102131935	-2.82
MB	-2.82	UniProtKB	Q7Y1U3, G3VUH4, P86873, P86874, Q8WVH6, H3C1W2, G1L3L6, A0A0D9R744, U6FIU7, Q6PL31, G1KST1, G1NJB6, H3AFT2, G1PMI1, U6FIV2, F7ARV1, Q2MJN4, Q7LZM5, Q7LZM3, Q7LZM4, A0A0A1XK17, Q7LZM1, Q7LZM2, P30562, U3KF95, G1RW45, U3IJ58, P32428, P14396, P02144, P02148, P02147, P02145, K7FMT4, P04249, P04248, H0V8S3, P84997, P04250, P63114, P63113, F2Z2F1, P02150, P02151, P02154, P02155, P02152, F1P8V6, P02153,…	Myoglobin	UniProt
TEF	-2.82	UniProtKB	A0A0B5H138, V9P8Y4, A0A0F6P248, V9P8Y3, A0A089VRP0, C1C117, W0LZ26, W0C354, V9P8Y0, A0A0B5H132, A0A067YJV7, F6QIR1, A0A067YK76, A0A0C5AJN4, A0A0C5QBI9, V9P8Y9, V9P8Y8, V9P8Y7, V9P8Y6, A0A0C5AJM9, A0A0C5AJM5, X2EXK1, A0A089NA71, A0A0F6P242, A0A0B5H149, V9P8Z0, A0A0F6T495, V9P8Z1, A0A0B5H144, A0A0C5AJM2, A0A0B5H3B8, A0A067YK87, A0A067YJW1, A0A0C5AJL7, A0A0C5AJL4, A0A0F7KPJ1, T1T5H6, A0A0B5H6B9, A0A…	Translation elongation factor 1-alpha	UniProt
LOC101867270	-2.81
LTBR	-2.81	UniProtKB	G9K8Z1, F7G4F9, H0VTW1, G1QTY6, G1SF49, G3P6Z9, G1PPQ3, I3K591, G3U204, J9P9E3, G3R5J9, F7CYY2, H2Q5A2, H0XK59, A6QQ46, M4AA93, W5PET4, F6V995, H3CRH2, H9F389, I3MKS6, A0A096MXV5, P36941, G1M7F0, M3W9V4, G3WNP5, F1SL29, F6Q3H0, H2ST59	Uncharacterized protein	Ensembl
PAIP2B	-2.81	UniProtKB	W5PP05, G3QMU1, F1SLE4, F6ZAI5, M3Y7M7, F7HGJ8, G3T0H1, H0XH79, F6S1A4, G7NAB1, R4GD73, F1PRY5, F7FQN0, H2P5W0, G1PFI6, G1MBG4, K7FWS1, G1RH17, H0VNF5, M3WIW2, G1TP14, F1N1G2, H2QI36, I3M3D2, Q9ULR5, U3JK04, A0A096N4I9	Uncharacterized protein	Ensembl
BSPRY	-2.8	UniProtKB	F6TT06, F1MKU3, U3JS82, H2QXQ7, G1PS29, A0A096P0T8, G3VEQ0, I3N1D7, G3T0F2, F1NNQ6, H0YWL6, M3X900, G1S412, W5P8H5, F6PLW9, M3Y932, K7FVI6, U3IHH5, F1PZA7, Q5W0U4, F6SYN3, F7GY94, G3QVP0, H0V309, F6SVI5, G3RXI7, H0WXS3, I3LPW1, F7ALQ6, H2PT44, H3BAG1, D2H2I9	Uncharacterized protein	InterPro
FOXO4	-2.8	UniProtKB	F6UYC2, H3DHD6, W5NCK7, K7CRH3, H0ZA91, G1Q0C6, G1QK78, U3J4J2, G7NRU9, H3BYU1, H2PVY3, H0V3X2, F6UBQ2, M3WZ98, W5Q3G2, A0A096N765, F6UBP4, H9GM22, K7GQL9, W5KLT6, G3RUU2, G1MTJ4, U3KBH2, I3JDA5, H3AMN3, F7FKI3, M4AFA7, G3QHF7, I3NDY8, G3PY01, P98177, G3VM37, F1RSV5, M3XZU9, G3UCT4, A0A087XSH7, A6QLP0, K7EUD1, G1TFI8, A0A0D9RGJ6, G1MBP3, E2RTA1, H0XWK9, K7F1W1, U3E3C7, H2U3N3, F7DRE4, H2U3N4, H2U…	Uncharacterized protein	UniProt
LOC102139072	-2.8
PRRG3	-2.8	UniProtKB	H9FC50, W5PFN8, H0XGZ5, H3B0D4, F6TGP9, G1RTR2, M3YJS2, I3LCP5, C9J7E6, F7GK82, F6TGY0, F1Q189, H2QZ84, F6WRW4, W5KI92, G1MF00, F7CHW3, A0A096NCY7, V8P5U4, G3TY12, G1N0X9, W5NCR2, A6NDZ7, H0Z7R1, M3W5X9, H2PX30, H9F0F7, I3M1U3, G3RAW8, Q9BZD7, U3K9I4, F7CXX9, E1B910, H3CT41, H0VIY5, R4GM05, U3IN96, A0A0D9R405, H9GKQ1, G1P8B3	Uncharacterized protein	InterPro
LOC101865386	-2.79
LOC102133769	-2.79
LOC102141025	-2.79
GRTP1	-2.78	UniProtKB	Q5TC63	Growth hormone-regulated TBC protein 1	UniProt
TMEM246	-2.78	UniProtKB	F6RHH0, Q5R868, Q9BRR3	Uncharacterized protein	UniProt
LRG1	-2.77	UniProtKB	H9GNC1, A0A0D4Q428, A0A0D4QW94, A0A0D4MQD3, A0A0D4LDD1, A0A0D4NLC4, A0A0D4MC61, A0A0D4MY99, A0A0D4QY71, G1PI93, A0A0D4PZD0, F7H1N0, A0A0D4N9W4, A0A0D4PCT3, Q5AAK0, G1L566, H0WW67, A0A0D4Q7D6, A0A0D4M5P8, A0A0D4QHB9, K7FWI6, H0VZC4, A0A0D4PAL9, A0A0D4LBR8, I3M1J0, M3Y167, A0A0D4MB66, A0A0D4QTY0, A0A0D4Q5A0, A0A0D4MZC0, F2R022, A0A0D4LS14, A0A0D4QVS3, P35688, A0A0D4LT97, A0A0D4NVE3, C7GJQ9, A0A0D4L…	Lrg1p	InterPro
SRPR	-2.77	UniProtKB	U3FJU4, A0A0B2UMC1, H9G398, G3RB09, A0A024R3M0, R0L6S9, W5PS58, R0M2C6, K7D648, Q3MHE8, F6ZQF6, K7FZP6, F6R4C7, F1NXV4, U3E4N1, F1MNJ2, G1R7B5, G1PWM1, F1S754, U6DP82, A0A096NCP0, H0WZI5, C1BLA7, A0A061R9V1, I3MEG7, J9P788, R0KX74, F7D2J2, G3W5B9, H0VSA3, H0YRD2, H2NFT9, U3JR43, K8Z840, G1MPZ3, A0A096N4B2, C0PUF2, A0A0D9S4H6, G3W5C0, H3BEB0, H3BEB1, T2MHS4, P08240, K7E5M5, M3Y5H1, F6YPN2, F7HSU8,…	Signal recognition particle receptor ('docking protein'), isoform CRA_a	InterPro
LOC102115698	-2.76
OXTR	-2.76	UniProtKB	A0A096MQT4, E2RFT4, A0A0B4ZZ10, P56494, A0A0D9REH7, A0A0B4ZWX9, C9JQC4, A0A0C6G5H7, F7ILY7, A0A0B4ZWX3, G3R8I4, K7FHK3, A0A0C6G6Y9, B2R9L7, G3UGJ6, G3S6I2, F2YMM4, A0A0B5A236, F6TJ38, P32306, P56449, G3WCZ9, A0A0B4ZWW7, J9P5B9, A0A0B5A287, E3V2E6, E3V2E7, F6U716, E3V2E8, I3N166, A0A0B5A292, A0A0B5A3Z8, H0ZJF8, H0VZP0, A0A0B4ZZ02, A0A0B5A404, H3K0J0, H2QM02, U3I5N4, A0A0B5A297, G1SQ05, M3WL83, Q28…	Oxytocin receptor	UniProt
LOC101926659	-2.75
DLG3	-2.74	UniProtKB	H2PVX7, F6Y1K0, U3EMM9, W5Q2F2, Q92796, J9NSK6, F7FL85, E1BLW4, F7D6C3, F6SE42, H0ZAP8, G1QJS4, U3IZ78, F6S3L3, G1TD43, M3XZN3, U3KBZ5, G1LS23, F6UBK1, G1PHN4, F6S362, M3W9Y0, G3VBN2, A0A096NFW2, H2QYR8, Q5JUW8, F1RTL4, H0X5L3, H9GLS2, I3MDY4, G1MU45, G3SLC9, K7FX79, H0UUM0, G3RRA3, U3E0N2	Uncharacterized protein	Ensembl
LOC101866654	-2.74
LOC102135165	-2.74
PDE4D	-2.74	UniProtKB	H0V454, M3XEU1, A0A034VFR6, D6RHE0, G1MY80, U3FVY7, F7GZT2, F7B975, U3ICL8, H3BDZ9, F7FNJ7, G1LA56, F7AQU4, W5PBB8, A0A0D9RUC1, F6VBV7, H3BE00, H0WAZ6, G3QVP9, G3SLG1, F7HBU7, U3CXQ6, Q08499, F7ANH5, U3FRQ4, F1PKQ9, H0YWR5, F1MS27, F6VSG9, F6VFT7, H0X5M2, K7B5P7, H2RBC5, T2MEC3, F7CAG3, H9FB80, F1NB56, H2QZM9, F7GZV7, V8NUR8, F7GZV9, F7GZV2, G3WWN3, F7GZV4, G1QQK9, A0A096NQK1, F1SKX3, I3NG07, G1T…	cAMP-specific 3',5'-cyclic phosphodiesterase, isoform M	InterPro
RAB40C	-2.74	UniProtKB	G3QXZ7, M3XEE9, G1R9J3, H3BMH4, L7N0W4, G3W514, H9FXS6, A9L8V2, H3BNV8, F7D2H2, Q96S21, I3NEA7, G1PFJ3, F6R7M0, A2VDR1, B2KHW7, H2QA75, I2CVA7, G3THY8, H3B3V2, F6XP26, U3JQ29, H3BPA5, U3I8H4, H9ZBS2, G1LKW5, H3BTC6, K7FIM8, H3BME4, W5UI16, F6VWT3, A0A0D9RJR9, K7FIM4, M3YX28, G1DG24, H0W8Q5, U3FGX1, R4GJ55, H3BUX0, H0YYY2, W5PSH8, F7HXZ4, H2NPK4, Q4S7P3, H9G718, H0WN84, H3BPB1, G1NCG6	Uncharacterized protein	UniProt
TMEM47	-2.74	UniProtKB	K7CN41, F7IBN3, H0VPG7, F2Z5B3, G1T428, H3AR65, W5QBI1, D2I5J2, G3RYW6, M3X238, G3TE37, U3JFZ6, F6QXI5, A0A096MZJ6, Q9XSV3, F6SCM1, A0A0A9YAK7, I3N069, A0A024RBY7, G1KS28, F6YFN6, U3IK45, H0XKE2, K7G8U3, F7C9W6, G1QHP5, A0A0B2VRQ1, H2R4S5, Q9BQJ4, G1PLI8, R4GIT0, H2PV89, Q1JPA3, G1NP63, G3VUM3	Transmembrane protein 47, isoform CRA_a	Ensembl
TRAF4	-2.74	UniProtKB	F6SA91, G3RKR6, U6CVN6, H0X679, C0H9L1, W5P1U4, C9JJ10, H3AMT1, G1SE83, J3QR87, F7ATQ2, A0A034VAY2, A0A024QZ19, K7B4A6, H0W5B7, A0A024QZ59, W8AK90, F7GT62, F6Q3D9, A0A0D9R455, U3DVI1, F7EJ57, V5IB48, A7MBK6, A0A0C4DFM9, F6RJL7, G3TB84, Q9BUZ4, T2M6V6, I3M5F6, E1BRJ5, M3W1F1, Q2KJU6, G3WPD2, F7EJ69, G1QRP3, G1LDA8, E2QYH9, F7A970, H9ET39, K7EJG7, F1RNA8, G1NJG8, A0A034VFX9, J9JIG0, H2QCJ2, U3JV33,…	TNF receptor-associated factor 4, isoform CRA_b	InterPro
LOC102117595	-2.73
NOXA1	-2.73	UniProtKB	M3W0L1, F7AD30, Q86UR1, G1MD17, M3YUK3, H0VFJ8, H0WS89, F1RVW5, G1MRF0, E2QX26, A0A096NWM9, G3WET3, K7FKN8, H9FDM1, U3J4X4, G1RD99, H2PU46, G3MZQ2, E1BWX5, U3JRG6, I3NH71, H2R266, F7G264, F6RVX3, F6PH96, W5NT59	Uncharacterized protein	Ensembl
SH2D4A	-2.73	UniProtKB	F7H637, H0YAT1, F7HQJ2, F6SQC2, G1QSH4, G3TDL5, W5P1F0, M3YN58, G1TBY2, A0A096MS91, H0WK73, E2QWQ6, G1PM48, G1MYY7, M3WQD0, G3S8L7, F6WCR5, E1BBL1, F6Z3V5, F7HK30, G1KVZ9, H2QVT6, F6R9A7, H0V510, G3X3Q8, K7G1X2, U3J431, I3MHV5, U3JVN5, Q9H788, D2H965, F6Q3Y8, H2PPP2	Uncharacterized protein	Ensembl
SLC22A17	-2.73	UniProtKB	G1MEK4, F1S9E2, G3WPZ4, H9GB54, F1PWS0, H9KVA1, G3TVB0, I0FJS1, H2R1C0, W5LYC5, A0A0D9RU09, H0V954, M3ZVK3, F7IQM7, K7CE55, S4RQH1, G1TCK8, I2CVI5, H9FVF0, H0XHJ6, M3Y5W1, I3NBL3, A0A087XXX3, W5QDH0, M3WAS5, H3BC54, U3CXQ9, H9F049, F7G489, H3BC55, Q8WUG5, I0FSC9, H9EU52, F6ZW68, W5L0V2, H2NKS8, G1PWC1, F7G480, Q3SZQ2, A0A096NX11, G3NBV6, V8NWQ0, U3BIG4, G3RLP5, H3CTM3, G1RYD0, F6UQ83	Uncharacterized protein	InterPro
LOC102123751	-2.72
LOC102131290	-2.72
ACSS2	-2.71	UniProtKB	F6TTU5, H0V2K9, G1MQ54, F7G4L6, M3Z286, G3RQA9, H2P1Q6, G1KGH1, A0A096NUR5, I2CVW8, B8XY19, G1LRV4, F6WY71, G1Q7P4, F7EMD9, C9IYL0, F7B118, H3BGI7, Q9NR19, T2M4U3, A0A0D9RHH9, G1RGL4, H0UIA1, G3U0I6, G1P644, G3QVL5, W5UQX9, I3MHP7, U3F826, F7ERB7, F7EME7, K7A523, M3VY97, Q4G0E8, F1NST1, G1SH60, K7G6E7, H0WJD3, E2R0C6, U3DNE6, A7YWF1, U3JTC5, J9P7N4, W5P9I9, C9J7L5, H0Z1I6, A0A088F8E5, V8PA91, W5P…	Acyl-CoA synthetase short-chain family member 2	InterPro
CANT1	-2.71	UniProtKB	F7CJN3, G7NH10, K7EQT4, G3SSF9, H2R9C6, U3F960, H0YYC0, H2NUX3, H0VIH6, U6CVJ5, G3WVH1, V5GU63, H0X3H3, U3B8C9, F7D6T0, K7FIK4, C1BQZ5, K7EN15, A0A0C9RXJ0, Q8WVQ1, W5NZ32, G1TMI1, G1QGY3, G1KSA6, I3NF69, F6V6A4, U3EE45, F7E414, K7EKW6, K7EKT2, T2M8Y5, H3B9E1, V8NUF1, W8APQ5, F6QX37, A0A024R8U8, K7CZ62, K7EMT2, G1N2S5, M3WYR2, M3YM05, A0A0D9S489, E1BGL5, F1NLP1, A0A034V8W1, B5X4M6, G3QJ21, A0A096N…	Calcium activated nucleotidase 1, isoform CRA_b	InterPro
LOC101866334	-2.71
LOC101926646	-2.71
LOC102138195	-2.71
GLUL	-2.7	UniProtKB	B3VK57, U3JZZ9, G1SW00, U3ISF5, P15103, K7FMU7, P15104, F6TAZ0, A0A0D9RJ85, P16580, H0VEQ9, H3B669, Q8AX87, Q8HZM5, F6PH60, U3F4R2, Q4R7U3, H2Q0Q5, M3WDH0, P46410, G1S8N9, A0A0A0MPE2, G3SJV7, Q9QY94, A0A087WYJ1, F7HDF1, H1A409, I3MN37, F7HSN9, F7CAM5, F7I5X3, F6XKQ2, G3RPZ2, H2N4G4, D0G6X5, H9GDW2, Q8SPJ7, G1QGF1, F1NQC3, G3SM75, A1L199, Q6TEP3, G1MW53, T2MGE1, A0A096NYR4, G1LMC1, H0Y294, W5QBP6,…	Glutamine synthetase	InterPro
LOC102116967	-2.7
LOC102135567	-2.7
RAB15	-2.69	UniProtKB	G1R4R4, J3QSF4, S4R5A0, G1P243, P10979, G1RW28, P59190, G1RW23, H9F1E1, F7FUY4, G3WJF6, V8PFI4, F1Q0Y2, H2R9A2, W5QJ39, G1NRZ7, Q00742, K7B0K1, U6DBU7, G3V196, F6SH43, G5ELZ5, G5ELZ6, H1A442, H2NLJ0, G3WJT5, G5EMR8, G3RKM8, G3V562, M3WY77, U3JEQ0, Q1RMR4	Uncharacterized protein	UniProt
SLC37A2	-2.69	UniProtKB	I3MRB1, H0V3T1, G3WTW9, F6R0U5, F7GYG5, M3Y4J7, Q58CV5, H0XDM4, H2RCS0, G1R793, E9PRJ4, F7GPR0, K7DFP3, M3WME2, F7F905, A0A0D9S4D4, F7G664, F1Q362, U3JS55, H9G3W9, G3RHQ0, G3RTK5, G3TIN5, H0YR54, G3WTX0, A0A096N6W4, A0A024R3J2, E1C5M0, H2NFR9, F7GYJ5, F7GYH1, G1MQ23, Q8TED4, F1S792, F1Q2V8, G1TM56, G1PBV0, T2M970, H3B3F4, G1L252, W5PNJ6, U3IWN1	Solute carrier family 37 (Glycerol-3-phosphate transporter), member 2, isoform CRA_b	InterPro
LOC102122544	-2.68
SLC1A5	-2.68	UniProtKB	W5NCK3, H0XVH1, H2LRW7, G3UH38, Q71UA6, Q15758, H2LRW4, K7FG94, A0A087XSS5, M0QXM4, G3SM58, H9GI31, K7BJW4, G3R0B3, W5LDR0, F1PPI5, H0V2W8, V8NNP7, H2QGN5, I3NCE2, M3Y1B2, A5HSH3, F7AIP7, F7AFR8, G1QRD6, F6XIZ0, M0QX44, Q95JC7, G1P3F8, G1SWM3, H2ZSX7, G3P4E8, O19105, G7PXZ3, F6QQG8, A0A089FVK4, K7ZSN9, Q4R8W8, A0A0A0MVF9, F1MTV5, F6PIC8, W5PM91, M0R144, A0A0B6VSG5, A0A0D9S2D3, F1RM08, I0FUB7, M3W…	Amino acid transporter	UniProt
LOC102134484	-2.67
PCBD1	-2.67	UniProtKB	V5LY02, C6ZRG2, V5LY08, M3VW96, R0JDR4, B4ZA82, S4WH12, B4ZA81, B4ZA80, B4ZA86, B4ZA85, B4ZA84, G1S282, B4ZA83, G1N0R5, V5M0H5, B4ZA89, B4ZA88, B4ZA87, V5M0H0, C6ZRF5, K7E9K9, C6ZRF1, B4ZA91, B4ZA90, B4ZA93, B4ZA92, B4ZA95, B4ZA94, B4ZA97, B4ZA96, B4ZA99, V5M0I4, B4ZA98, V5M0I0, V5LY44, B4Z7N8, B4Z7N9, B4ZA69, V5LZA4, B4ZA67, B4ZA68, B4ZA65, B4ZA66, B4ZA63, B4ZA64, B4ZA61, B4ZA62, B4ZA60, V5LY35,…	Uncharacterized protein	Ensembl
ARHGEF38	-2.66	UniProtKB	H9GE23, H3AQU8, H2SJM7, M3X975, G1N2X8, A0A0D9QVG8, F7F3Z6, G1SW22, G3VPN8, H0VUS0, H2SJM9, H2PE17, H2QPZ7, H2SJM8, F6SMP5, I3NDC9, F7B2Y9, E2QUS3, H0WS69, M3YC74, W5PKQ4, G1RRU2, H3DL01, F7GJ57, A0A096MQ65, F7B2I1, W5N4H4, H2SJN0, G3N382, Q9NXL2, G1TID5, U3K0P9, F6ZJK3, U3ISR0, F1PXT2, H2LQB6, F1N0Q1, K7FTH6, M3ZT59	Uncharacterized protein	InterPro
IFRD2	-2.66	UniProtKB	F6Y463, H0X759, I0FV04, G1LZ64, Q12894, U3K2B9, A0A096NDA5, H2PAP2, H2RBQ8, G3TD70, G1KI72, I3N9K5, H0ZV08, Q3SWW7, W5PJF5, G3QVY0, I3LP45, G1NXX6, F7H7C1, G1SHD9, H0W679, M3W6X4, F7CY73, F7E2V7, F7GI34, G3X309, G9K597	Uncharacterized protein	Ensembl
LOC102115882	-2.66
MAGIX	-2.66	UniProtKB	U3IE13, F6U414, W5LB66, H3D9M6	Uncharacterized protein	InterPro
VAMP8	-2.66	UniProtKB	G1QN71, G3SNQ2, Q3T0Y8, M3WG39, I3LHS5, Q5REQ5, G1SHE6, W5QH60, U3I3H0, U3JBF8, A0A096NZU7, B5X917, H2QI95, B5X4E5, Q9BV40, G3QQI0, W5UK68, H9GVR0, H0X6J5, G1P4K2, I3M704, C0H879, A0A0D9RUG9, F6Z5I2, E3TC10, E2QUL2, C1BWR1, F6YR57, B8ZZT4, F7HDH5, F6ZVQ1, G1L653, C1BHL6, C9JXZ5, K7G3T2, M3YCA8, H9GCP9, H3A0V1, E3TG77, H0UW49, H3A0V2, A0A060RX20	SNARE protein, putative	InterPro
C16H17orf100	-2.65
EPB41L1	-2.65	UniProtKB	I3MXC7, Q29RW3, F6QNK6, W5Q1K6, F7CB08, F1N611, A0A0D9RCE7, G3SYG8, F6PK61, E1BZY9, M3X9M8, G1MQM8, F7CBB9, Q9H4G0, G1LU01, H1A1N0, F7CBB2, G1RHL2, G3VML3, U3E5N2, G3VML4, F6UAX5, A0A0C4DH22, H0VL02, K7GEH7, U3IXG6, H9G5V4, E2QXY5, F1S485, G1PJH0, F7CAY4, W5LZW9, G1SL22, F6YUT2, U3DHC6, V8NQA6, X6RC15, F7GAK7, A0A0B2W122, G3SFI6, Q4VXN0, Q4VXN1, H0WJ71, H9FR32, M3XHK6, Q4VXN5, M3Z258, Q4VXN6, K7G…	Band 4.1-like protein 1	InterPro
ND1	-2.65	UniProtKB	A0A0A7DEW2, B6DCG7, D7PEQ2, A0ZPV1, B2LAT0, B2LAT1, B2LAT2, B2LAT3, B2LAT4, B2LAT5, B2LAT6, B2LAT7, D3KC67, B2LAT8, B2LAT9, F1AWH5, R9QAZ3, B2LAV0, B2LAU2, B2LAU3, B2LAU0, B2LAU1, H6UCE8, B2LAU6, B2LAU7, I2DA63, B2LAU4, B2LAU5, Q6WTL6, A0A0A0VB08, B2LAU8, B2LAU9, K0A2E4, F3Y699, Q6WTL5, B5B724, A0ZPT8, A0A0A0VB23, I3PDG3, Q4ZGF7, D3KC91, S5G9D7, B2LAR1, B2LAR2, B2LAR3, Q2QI34, B2LAR4, B2LAR0, B2L…	NADH-ubiquinone oxidoreductase chain 1	UniProt
MFSD3	-2.64	UniProtKB	I3MEY0, K7F5G9, A0A087YCI9, K7GKG1, W5MTY8, A6QNN0, F7G427, G1RJ10, G3T3U7, Q96ES6, M3ZIV1, F6XB31, G1LFU8, T2M788, F7FD01, F6WUA1, K7GKL3, H2PRH9, H3DB24, F7FCZ6, G3REH0, M3Y3Z4, J9PBH7, H0W0T3, A0A0D9R7F9, H9GGJ7, A0A096N3E3, F1RSP6, M3XKX2, W5LSJ4, F6TEE7, E2RID9, H2QWX5, M3X0S6, G1PHW2, G3PCE8, F7API9	Uncharacterized protein	InterPro
MYO5C	-2.64	UniProtKB	M3WH72, H2Q9G6, H0YM96, K7FKV7, H0WZ18, G1N3N0, G1PYT4, H3AF09, H0YM93, F1MX93, A0A0D9RG53, I3MM75, F6USL1, G1R3Y9, V8N1Y2, U3KBK4, F6QDZ8, W5QIG1, G3S5Y4, F1RZC1, G1STI8, H0Z8M5, F6USP8, Q9NQX4, J9NTT5, F6W1D0, F6UU44, R4GAI5, F7AL27, G1LKY6, F7GB66, G1P863, H0V9K4, M3Y891, H9FBJ2, U6DMU0, H0YMK3, E1BXJ2, H2NN95, F1P8I8, A0A096NM46, G3RCG3, G3TFF4, G3WYP4, F6UST4, T2M5F9	Uncharacterized protein	UniProt
ND4	-2.64	UniProtKB	Q2V929, A0A0C5KR48, Q2V927, Q8HBI1, Q2V926, Q1HUY0, Q1HUY3, Q2V921, G4W840, Q1HUY6, G4W841, Q1HUY9, M9YZE4, Q2V924, A0A0C5KR41, G4W844, M9YZE7, A0ZPW0, G4W848, H6UCF7, I2DA72, A0A075CNC9, B3TZ43, J7FRL2, A0A0A7DF80, F1AWH1, Q2V916, Q2V915, A0A0A0VB12, C7SFN7, A1DZN8, F1AWI9, Q1HUZ8, A0ZPU7, G4W851, G4W852, B6DCH6, A0A0A7DF79, Q1HUZ5, G4W850, Q2V912, G4W856, Q2V914, G4W853, Q2V913, G4W854, D7PEP8,…	NADH-ubiquinone oxidoreductase chain 4	UniProt
SMPD2	-2.64	UniProtKB	W5PL49, F1N588, G1KIQ0, M3W5S2, H2QTJ0, G1SVI3, U3JLY9, G3SS43, G3QLI3, K7FF54, H0V029, G1P0Z5, F7I8K1, M3YF23, G1N4U5, H2PK06, H0XDE2, A0A096MU47, F7EAJ0, O60906, U3I999, H0YU02, D2HT00, H9F1T4, F7BVE0, F6XXV8, E1C2Y6, I3NDX6, F1RSY4, E2RQN3, H9FDT7	Uncharacterized protein	Ensembl
FAM150B	-2.63	UniProtKB	Q6UX46	Protein FAM150B	UniProt
LOC101864945	-2.63
LOC102133421	-2.63
PABPC4L	-2.63	UniProtKB	F7IRA3, U3B810, I3N8L9, F7EVC8, H0XKB3, P0CB38, G1QFI2	Uncharacterized protein	InterPro
CCDC149	-2.62	UniProtKB	Q0VCP9	Coiled-coil domain-containing protein 149	UniProt
LOC102115828	-2.62
LOC102131145	-2.62
LOC102135232	-2.62
SNPH	-2.62	UniProtKB	G3WGW0, G3SWK4, F7HZM5, H2P1G5, W5QBK3, W5QBK2, K7FTN9, G1RDW8, H2QJT4, A0A0D9RDW2, F7F263, H9GDU2, O15079, F1MG26, H0W5D0, H0WL51, F6UMW0, G1T4X5, G3UT03, K7DKT7, U3ISG3, R4GGL7, I3MZI1, G1L0C8, G3QLF8, M3Z2L8, F6UTX0, F1PWL0, A0A096NV48, G3SDV6, G1P181, I3LEG4, U6DAG7, U3FU70, U3JTB7, H0Z955, H3APY2, H9G2E8	Uncharacterized protein	Ensembl
SORBS2	-2.62	UniProtKB	H7BZX1, G1SPQ9, A6QPR3, G1LF34, G3RD97, F6VBQ6, G1PPV6, G1TB88, F6S6Y5, H7BZK1, G3TQW6, F6S7N6, M3YIH7, H0X3S8, H0Z929, V8NQG3, G1KA47, F7BNJ1, V8NVQ7, K7BVE7, G1RKW5, K7FWY3, A0A0D9S2K1, G3UA74, F7I4K1, H2QQJ1, H2PEW8, C9J9D3, F7EGI9, M3W6Q8, A0A096MVN1, F6S703, C9JEA9, U3KBQ4, O94875, H9F6C5, U3INH3, I3MPG0, H9EZE3, F1P6U1, F6VB08, C9JL62, E2RDW3, C9JWC3, F1N483, I2CXS3, G3SS61, C9IZ89, H0V481,…	Uncharacterized protein	Ensembl
TESC	-2.62	UniProtKB	U3D5Q1, H0VKH2, K7FQ53, H9GN96, G1M1G5, H2Q6Z0, H2NIT1, U3DSC3, H0X6R9, F1MDB6, G1NWC4, I3MF78, G3TKF8, C3KHV2, C3KH24, C1BK86, U3JXD9, F1PSQ2, A0AVX7, F6VIL1, F1RKE8, F6Y8W8, U6DBL5, F7BHH0, M3XUL7, G1NC86, W5P4K3, E3TEZ3, A0A096MWA3, G1QHE7, F7I0N3, H3ALN2, A0A0D9S4C3, G1TFW3, M3VYV3, E1C4Y3, U3IXE4, H0WCS4, Q96BS2, B5XBD8, G3QJU1	Uncharacterized protein	Ensembl
LOC101925038	-2.61
LOC102121968	-2.61
DNAJC28	-2.6	UniProtKB	Q9NX36	DnaJ homolog subfamily C member 28	AgBase
FAHD1	-2.6	UniProtKB	G3T195, H3A3Y8, F7H559, G1NRB2, K7A0Y7, A0A0A1XKB4, H2R9Y3, F7A6M5, C1C4A4, B5X9B0, K7EZY1, U6DVK9, C1BUR8, F7EAX7, Q6P587, G3WKW3, Q2HJ98, A0A096MXI1, C1BJL2, K7CS98, I3MCY7, G1MKA0, G3S679, A0A034VJ30, Q5RDW0, M5FKD8, A0A0D9SBX2, U3KJQ1, M3X246, C1BR54, A0A034VLE4, H0W756, T2MB80, G1RBY8, F6YDT1, G1RBY9, H0XMM9, F7H551, A0A0A9VUS6, D3PJM2, G1NU37, B5XG62, H9ESY3, F1NXZ7, W8BYV9, H0Z8P8, M3Z8L5,…	Acylpyruvase FAHD1, mitochondrial	InterPro
C1H1orf168	-2.59
LOC102138282	-2.59
LOC102141626	-2.59
CEBPD	-2.58	UniProtKB	U3EBA0, H0XSH7, Q9N0J3, F6PRV9, H0VZW9, I3MUP4, H0ZKQ0, W5PNE6, U3KIE5, B5XFS2, B5XFQ1, A0A096NFA5, F6Z8Q7, P49716, O02756, H2PQ94, U3I4A9, B5XFT6, Q504X4, F7DQJ0, H9GID2, H3B5E7, F7C1G5, C1BFU7, G3QYG1, G1TT13, F1RSE5, M3XPY5, B9EQ33, J7MDB4, H2RH65, B9ENT4	Uncharacterized protein	InterPro
DBNDD2	-2.58	UniProtKB	H0X2K3, H9EYQ3, M3Z1Q8, G1TXU2, G3URV5, K7G4K0, A0A0D9RPH5, K7G4I7, G1P5V3, H2P225, A4K2W3, G3N0X5, M3WSU9, W5M794, F7D440, E1C491, H0Z3J9, F7G8M1, F7AHQ5, G3WLP5, F2Z4B9, Q9BQY9, G1MWT8, H2QKF6, U3JSC8, G1LC78, W5P5W3, F7E1L3, G3T1B2, Q3ZBQ3, W5M783, F7AHR9, E2RDR3, I3MX54, H0Y7N7, F7G8N2, F7FE40, U3I7Y4, G3QNG9, A4K2M1, H9GII3, G3SG72	Uncharacterized protein	InterPro
GPR56	-2.58	UniProtKB	U3EUN1, F6REN8, K7DC97, I2CUW6, U3C7R1, F6QW87, H9G1V4, F6PGK0, F6REQ8, E1C0Q2, K7CY90, V8NFM0, U6CVB6, Q9Y653, A0A024R6U7, U3FP32, H9ZFE3, F1RF36, U3EMQ3, H9EXE0, A4IF70, H2RDP7, F6REP5, Q50DM6, F6TZI9, Q50DM5, Q50DM8, F6YEC0, Q50DM7, H9YVI5, H9YVI6	G protein-coupled receptor 56, isoform CRA_b	InterPro
LOC102121945	-2.58
TMEM45A	-2.58	UniProtKB	Q9NWC5, U3D8V8, Q1LZG9, F6YZ93, H2QN05, J3KQ06	Uncharacterized protein	UniProt
GADD45A	-2.57	UniProtKB	Q60GI5, H3DIH9, A0A087Y8A4, G1NHD6, G1P308, H2MH52, F6W540, H2MH50, M4A6X3, F7E1K0, F7C087, P24523, P24522, H2R902, G1RDG6, H9GI61, J9JHW5, F7EEI3, H2UW18, M3XNZ5, H2UW17, G3T3K7, Q3ZBN6, F6SSE6, Q15B93, H0XV29, F7HPG4, A0A0D9S712, H9FA89, H3A403, W5UKS7, K7FEJ4, I3NAW1, W5UFI5, F7EEF3, G1SW81, A0A096N8C4, I3IXS3, G3R5D8, W5PNZ3, I3IXS2, H9F132, H2N736, F7DTF6, G1LCY5, A5JUZ3, A0A0A1XLZ6, H0V6C5	Uncharacterized protein	InterPro
KCNMA1	-2.57	UniProtKB	F7CEV6, A6P3C6, B8QB06, F6Q8D2, G3USZ9, G1MHF1, K7DU85, F6RVE3, F6RUT9, S4R2X4, F6YCL1, F6YCD5, H0Y406, F1PT15, F1PT14, F7GFI6, H0Y606, J9P0G6, G3U1X6, Q9BG98, A0A0A0MSE6, U3DUJ2, G1N2U3, M3Z9L1, G3QE16, J3KQ16, G1P5F2, F6R266, Q28265, B7ZMF5, Q12791, W5PHF1, F1MSP6, Q8AYS8, A0A096P4I3, F6RDQ5, W5PHF6, U3FC83, F7EYH8, D5MRH1, F7GZB0, F7EYI1, H0Y382, F7GZB8, F6R6E8, F6RV70, U3EBP4, F6PQ25, G1MHE3,…	Uncharacterized protein	Ensembl
B3GALNT1	-2.56	UniProtKB	C9J0F8, W5PZX5, F6XVE1, G1SEW9, M3WIH1, Q5RAL7, G1NDI7, H2REP0, F7F2E2, G3WUQ3, G3R1L8, H0UZH9, G3N3L8, F6XU70, H0Y121, M3Z5L5, C9JD16, E2RC36, W5M7A1, D2HVY3, R4X5Z4, Q49AT3, A0A0D9SC20, Q864U6, Q0VCK6, K7FKU6, H3BI29, I3MP06, H2PBW6, C9J8U7, R4X604, K6ZKE2, F1P3E2, R4X5Z0, R4X601, E7EVS2, O75752, E7EVF0, H0ZLM3, F6SXB5, F6UCJ0, G1QXG0, G1KGE9, G3SRB7, U3JFA8	Uncharacterized protein	UniProt
C7H15orf38	-2.56	UniProtKB	F1SK02	Uncharacterized protein	Ensembl
IGSF3	-2.56	UniProtKB	U3JFM4, M3WEY2, F7A7Z0, O75054, G3WYU0, F7BCG6, F7CL61, G1KWQ8, M3XRB2, G1NNP9, F1MJ00, H0UXL0, F1P9K1, G1NZK2, A0A096N472, G1SNL2, H2PZR8, F7HE18, K7FU97, H0ZTH1, E1C5G2, F1SAX8, U3IHM1, G1LEX3, G3SFF4, G3SMN8, W5QG84, H0XGQ6, F7IG06, G1QZ76	Uncharacterized protein	Ensembl
ING2	-2.56	UniProtKB	A0A0D9S2C5, F6V9K8, Q5GRH6, K7EZG5, A0A0B2VD52, F6XRF2, G1QBQ3, G3MY31, C9J4X5, G1T213, G1RIH3, Q9H160, U3KJN3, G3WHT8, D2GY56, U3HZ72, B5X4S4, F4HWW5, F4HWW1, H8ZW31, H8ZW30, H8ZW33, H8ZW32, E2QX70, H8ZW27, H8ZW28, M3YHZ7, I3MMM4, H0VKP7, H2PEU1, M3WYK9, F6V9W3, H0Z849, I3LVN3, K7E1D9, F1NSR3, F6VM00, G1KFY5, G1N409, H0XFY1, A0A0D3BZ60, H2QQH6, W8AXQ5, K7BU65, F7DTJ3, G3TDF8, A0A096MQ17, C1BLQ5,…	Chromatin modification-related protein png2	InterPro
IRX1	-2.56	UniProtKB	H3AYK1, E1BJK0, M3Y8C6, W5P6Z2, F7DBM9, G3U888, H0XRR4, F1NMD4, P78414, I3NBV5, F1PMA0, H0VWJ4, F7BBU9, F7D6M5, G3WK47, U3J3U8, C0HAT6, U6DP27, A0A0D9RXP4, H0ZDV5, K7GFH5, G1RK85, G3T8L3, G3TS80, F7H9D7, F7DTJ7, A0A096N6F0, H2QQL6, F7ERT7, H2PF50, H9GSE2, G1U0F4, G1L498, U3JRP1	Uncharacterized protein	Ensembl
LOC102138293	-2.56
MRPS34	-2.56	UniProtKB	E2R798, U3JRB1, F6Y7X0, U3E0K3, P82929, W5U6X2, G1NCU9, C9JJ19, V8PIJ7, H0YY63, I0FUE3, G3TNE2, H0V5B4, F7F2K6, F7DS01, G1RBT9, F1RG19, H0X7E6, U3EDT2, K7F6I6, A0A0A1WHB4, G3QTR6, F6W9G1, M3XB46, H9G3Q2, K7D589, K7DD51, G1LP42, H2NPQ6, I3N0W7, K7D8E9, A0A096NKW9, H9YV76, U3J3C7, F1MKN3, E1BS82, W5Q4I2, H2QAA7, G1Q434, P82930, M3YVY7	Uncharacterized protein	Ensembl
KCTD8	-2.55	UniProtKB	H2QPE1, F1NX81, W5PCV6, M3X0W9, G3RNW9, F7IKH0, K7FBQ0, U3IPC2, M3WQ33, G1NHR3, G1PGY9, W5UHC5, F7IKG5, F6R4D4, I3N7H8, U3JJU5, G1TJS3, F7EWZ5, G1TIL8, Q6ZWB6, G1M289, H0X5F0, H0VL93, G1KG50, F1PH13, H9F5M9, H0ZDQ9, F7CFS7, H2PD75, G3MWZ7, G3RYB7, G3SXK2, A0A0D9SE95, U3FLB2, G1M285, H3AAZ5, A0A096MLQ3	Uncharacterized protein	Ensembl
LEPREL4	-2.55	UniProtKB	Q92791	Synaptonemal complex protein SC65	PINC
LOC102125160	-2.55
LRP3	-2.55	UniProtKB	O75074, H9H195	Uncharacterized protein	InterPro
RNASE8	-2.55	UniProtKB	H2FJU5, Q8TDE3, A0A0D9S9W9, H2FJY4, H2NKJ5, H2FJY5, A1YLB9, H2FJY6, H2FJY7, H2FJY8, Q8SPZ5, Q8SPZ4, H2R9G2, G1SC75, F7FFI8, Q8SPZ8, Q8SPZ6, Q8SPZ7	Uncharacterized protein	InterPro
COX2	-2.54	UniProtKB	Q0VH66, Q0VH65, D1YUE1, J9PGQ9, F1AWH8, J9PH27, A0A0A7DF88, E2RUQ7, E0YCG3, A0A088N6B8, Q2TRW7, J7HTR0, U3N6J0, V9NJP2, A0A075QVK4, B6DCH0, W8CFI8, C9D8C3, A0A075QVK8, B1P0Q4, H6U9Z3, D8WHD9, E2E993, E7CST2, H6UCF1, E2E992, E7CST3, E2E991, Q0VH60, E2E990, E7CST5, E2E997, E7CST6, H6WCB3, E2E996, Q199I5, Q0VH63, P47918, A0A060H5U4, E2E995, E7CST8, Q0VH64, E2E994, J9PH12, L8B2M1, J9PGP3, A0A0A7DEV4,…	Cytochrome c oxidase subunit 2	InterPro
BRI3	-2.53	UniProtKB	Q32L83, O95415, R0JTY1	Brain protein I3	UniProt
GABARAP	-2.53	UniProtKB	W5PMY4, A0A0D9RHK5, I3L3J4, G3W239, V8N9R1, I3MTA2, Q8MK68, G1R9C8, F6U6S1, D7RA28, H9XQ24, H2NSH8, Q6IAW1, H0WPT0, O95166, H6UMI1, T2MID2, G1MDM5, F7ANW4, G1P2V9, M3YGD9, G3RD36, F6QQ50, M4AMW7, H2QC26, F1Q2L2, I3L236, G3Q6X6, Q9GJW7, G3Q6X5, M3X7G0, G3TQR5	Uncharacterized protein	UniProt
LOC102129485	-2.53
LOC102138258	-2.53
LOC101865616	-2.52
LOC102120456	-2.52
SLC27A1	-2.52	UniProtKB	G3U7E7, G1LVP6, F6XCL6, M3YWR3, G8IG86, K7AG69, Q3ZKN0, G1R1E2, K7FLT3, M0QZC9, M0QXY2, I3N252, H0VFB2, I7D6W9, U3IWN5, H2R6A6, F7EHN1, W5Q4S7, H0WFQ3, H2NY11, G3QQK0, H9L008, M3W7U2, I7C6K2, A4IFM2, V8PAI2, G3WEK3, F6SCF1, B7Z225, G1PVI6, I7BWB8, H9F7S8, G7NMS0, F6Q413, A0ERA7, E2RJS2, Q3HUX0, F1MB67, F7B110, F7HJF3, F7HJF5, H9H0L9, Q96DY3, A0A0A0MWH3, H9G9R0, F7AGL3, A0A0D9QZT8, Q6PCB7, F7AGP8,…	Uncharacterized protein	Ensembl
TMTC2	-2.52	UniProtKB	F7CBC6, A0A034V5A4, T2MA73, F1PW92, A0A034V703, G3S2U8, G1MEQ3, F1NPM4, F1MG00, G1QZS7, A0A096NP67, K7FEV7, G3TL94, W8B300, H0ZBY3, A0A034V6F5, F7G378, F6UNE9, G3MY32, F7CI20, U6CTQ3, W5Q114, K7FEW1, F7F5F8, U3J2G6, G1TEJ9, W8BNU8, G1KQ79, H2NI67, U3C840, H0V5F2, K7FEW6, I3M938, U3K7J0, A0A0B4J253, H0WGH7, H2Q6J8, G1PFI9, K7D9Y3, G1NF43, M3Y3Y9, Q8N394	Transmembrane and TPR repeat-containing protein CG4341	UniProt
FZD7	-2.51	UniProtKB	U6DSI8, I3N0L1, G3WII5, H2P8B3, U3DIC8, O57329, A0A0D9SBP9, F1SI18, G1N7U9, F6ZLC4, H0ZIP9, O75084, K6ZWL9, D2HB98, M3X451, H0XWH9, F6X7X4, M3Z5C2, G3R5G7, G3UC95, F6XX91, F1N4K7, H0VXY9, V8NFZ8, H9G9X6, F7A659, G1PZF9, U3BUJ9, G1SAS9, G1TRX6, H2QJ90, F1N965, H9FFF0, F7I3D1, W5Q7X7, K7FT55, A0A096N7F2, U3I1D3, H9FM67, U3KLL5	Uncharacterized protein	InterPro
LOC101865232	-2.51
LOC102129217	-2.51
LOC102131130	-2.51
B3GALT6	-2.5	UniProtKB	H9F761, A0A0A9YDT9, F6Z714, U3KJK4, F1MVH6, F7EQR4, G3UU25, A0A0D9S935, A0A061RB43, Q96L58, H0W6A7, A0A096MWT4, E2R9G8, F7DRW8, U3I5J1, G3UAU0, E1BYQ2, Q9MAP8, F7A456, G1MLH4, K7EYM3, W5P7F1, H0Z0U9, E6ZFE5, T2M7A0, M3XYL9, F7CX70, A0A061R181, I3MYP1, H0XJH5, Q499Z2, H2PXT4, I3LU42	Galactosylxylosylprotein 3-beta-galactosyltransferase	UniProt
LOC102130243	-2.5
LOC102143309	-2.5
NR4A1	-2.5	UniProtKB	M3Y8I9, A0A0D9R0J0, A0A024R126, Q32KW3, U3JBF0, G1S7S8, G3TB33, G1P821, H1A2K3, K7EVR2, H3BSB9, F7HG84, G3QU80, U3J360, H3BT85, F7HG81, H0XMF5, G3SE60, G1T1W2, H2QZT3, P22736, K7GJ87, K7D0Y5, F5GXF0, H0V023, I3LM58, H0WTY9, G1KT44, H2NHC6, H3BPN8, I3MTT9, G1L4M0, A0A096MPB8, Q0V8F0, F6XN57, G3WHA4, G3UM99, K9J6P0, F8VVX9, P51666, H3BIN6, W5Q6X7, F6TIL9, M3VUE4	Nuclear receptor subfamily 4, group A, member 1, isoform CRA_d	InterPro
LOC101925441	-2.49
SEC62	-2.49	UniProtKB	H3B6X9, A0A0D4XGY1, C1BVC9, K4HA64, I3MDF3, A0A0D4RW07, A0A0D4IEA2, A0A0D4ZIR9, F7C318, A6ZWF7, A0A0D4ZI98, A0A0D4YDF5, A0A0D4XZG9, A0A0D4ZG90, A0A0D4YBG9, A0A0D4X7E1, A0A0D4YBY0, F8WF48, A0A0D4YF75, A0A0D4YP04, G1QZ87, H9FBZ8, J9NUW8, A0A034WFW0, Q75D26, A0A0D4Y3B6, A0A0D4XEI9, A0A0D4X9U7, A0A061QPG5, A0A0D4YWD0, Q99161, A0A0D4IFL1, A0A0A1X6Z7, F7C308, G3RCU2, G1TL37, G1KRM7, A0A0D4X440, F7CA52,…	Sec62p	InterPro
LOC101866012	-2.48
LOC102128771	-2.48
LOC102138601	-2.48
LOC102145030	-2.48
MRO	-2.48	UniProtKB	D2H523, H0XFV5, F7F470, F1RPP0, A0A096N9Q3, Q58DE2, F7GJC6, F7AAN7, H2NWD1, H2QEJ3, F1PAY1, G3SIT6, G3W1E2, F7ICF4, Q9BYG7, G1STJ1, I3MEJ1, F7DVH1, H0V5W5, W5P325, G3N261, Q8WNV3, G1PQB9, G3TAJ1, M3WQZ1, M3YBM8	Uncharacterized protein	Ensembl
PPP2R3A	-2.48	UniProtKB	I3MNJ9, A6QNV9, U3KPE5, U3CX51, W5PDW2, Q6P0N9, A0A0D9REP4, K7B192, F6Y031, E1BIU6, F1SL86, F6R6T0, H0Z9Q3, H2PBH9, G3WY26, G1QUV1, F6Y101, U3KGA6, M3YD89, M3X5H2, G3TBD5, E1BSV2, F7D7G4, K7G6B6, F7CXE3, F7D2I0, G1PLP5, H2QNF3, U3I4T7, Q06190, G1MTE2, G3TSU2, A0A0A9W2I8, G3QE64, H3AW25, H0UYX1, H0WUY9, H0W420, K7DC60, F6R6S3, A0A096N9A0, A0A0B2VF79, F6Y0D1, F7AG35, G1SG86, G1KGE7, E2RAA7, W5UHW3	Uncharacterized protein	Ensembl
C12H2orf88	-2.47	UniProtKB	F7FC58	Uncharacterized protein	InterPro
CYTB	-2.47	UniProtKB	A0A077D5G1, Q5MG50, A0A075W650, Q5MG52, Q199I9, A6Z025, Q5MG53, Q5MG55, V9I3L9, A0A088Q804, A0A075W658, D7PEQ1, A0A075W653, C9D8B9, A0A088QIY5, K0A2D8, F1AWH4, H6WCA8, K4P1E4, H9SGH6, A0A075W668, A0A088QIX0, A0A075W663, A0A0F6PXN8, H6UCE7, A0A059RVB5, C9D8D2, A0A088FP83, Q199H6, Q5MG75, Q5MG76, Q5MG77, Q5MG78, Q5MG71, I6NPR9, A0A0C4ZKL9, Q5MG73, Q5MG74, J7FRI3, A0A088Q820, A0A0A7ADE9, A0A075W632,…	Cytochrome b	UniProt
EPS8L1	-2.47	UniProtKB	F7D3D1, H2QH51, W5NV46, G1RIL0, H2P061, E2QUI7, I3N9A0, M3X4X2, B4DKV7, G1L9F9, H0WTB8, H0V8P8, H9GNP9, F7F182, E1BKS0, F6S219, K7F9A6, G1Q132, G3QHI4, I3LS55, G3UEB1, A0A0A0MXK2, E6ZGT8, H9KYI9, Q8TE68, M3Y9K5	Uncharacterized protein	Ensembl
LOC101925213	-2.47
LOC102134264	-2.47
ND5	-2.47	UniProtKB	A0A0A7DF85, A0A023Q8L4, B6DCG4, H6UCF8, A0A087ZMQ5, A0ZPW1, I2DA73, Q5XLT9, H9S5A5, F1AWH2, K4LPC0, K4LPC9, A0ZPU8, Q8HBJ8, B6DCH7, R9QAZ5, D7PF14, D7PEP7, H6UCE5, F3Y696, Q5XLU2, Q5XLU7, Q6R680, K0A2E3, C7SFN6, A0A0A7DEU9, U3LC10, A0ZPT5, Q4ZGG0, Q2QI39, H9PBJ4, Q6R693, H6UCH1, Q4F604, Q8HBL8, A0A0A7DET3, Q8HBL5, Q8HBL6, A0A0B4U6M5, Q8HBL0, A9LY96, R9QAX1, B4YYE9, A0A0A7DF58, P34855, K4M1F0, F1A…	NADH-ubiquinone oxidoreductase chain 5	UniProt
ATP6	-2.46	UniProtKB	D1YUE3, A0A059QPL3, A0A0A0VB05, A0A0A7DEW7, U3LBN0, A0ZPV6, A0A075W656, H6SSR4, H6SSR5, F2WU05, H6SSR6, M4ZVF5, A0A068BJ90, F2WU04, H6SSR7, H6SSR8, H6SSR9, F2WU01, H9STS2, A6ZB88, P68526, C9D8C5, H6SSR1, B7XBM7, B6DCH2, H6SSR0, A0A0B5G1U2, H6SSR3, H6SSR2, H6UCF3, Q199I3, K4GJ39, I6UL41, H6WCB5, I6UL47, A0A068BJ88, P68527, I6TD92, L7UZI5, K4GJ47, K4GJ44, R9QAZ4, H6SSQ6, V9I3M5, A0ZPU3, D3KC80, H6S…	ATP synthase subunit a	UniProt
FAT2	-2.46	UniProtKB	A0A089RPM4, A0A034VF20, H0YR89, G1LN21, G3QU44, A0A089Q6C9, U3ICD8, A0A089Q6C4, W5U6J6, E2RM62, V5GFK3, A0A0D9RET2, G1KUY0, H2PH50, A0A089RPM9, A0A096NP43, G1P0L1, G1T2M3, A0A089Q7B2, M3YQG2, V5GAL0, A0A089Q7B9, F1MPF3, F6UEZ7, G3VT48, H0VR05, F1RQB2, A0A089Q6B8, W5PGD0, F6UD14, A0A089RPL7, V5G0G9, U3FY49, A0A089Q7C6, H0XDR7, H3BE38, A0A089QA68, H3BE39, D2HFC7, A0A089Q6E1, A0A089QCM7, A0A089QA76,…	Fat-like cadherin-related tumor suppressor-like protein	InterPro
GAREM	-2.46	UniProtKB	G1T626, U3JTP2, G1R3J4, H0ZKH9, Q9H706, D2HQL4, F1MQL7, G3R3A4, G3VTQ7, F1P686, F7B9T5, H2NW54, I3M062, H2QEF2, F7I1X6, A0A096N201, H0W374, G1NVQ4, F6VMJ1, M3WTS4, F7BZ87, F1SAL5, F1NTK0, G3SU88, H9GPU3, U3EBM3, U3IGU7, H0WI70, G1NDS3, K7FCX4, F7ANG0, M3Y6S3, W5P7S8	Uncharacterized protein	Ensembl
LOC101867035	-2.46
LOC101926501	-2.46
LOC102145385	-2.46
PFN2	-2.46	UniProtKB	C9JQ45, A0A0D3N638, G1PBE2, H0ZMC9, A0A0D3N5H6, G1QSE9, D3DNI3, D3DNI2, F6SJ41, F1NUH4, A0A0D3N5D2, F2Z3G0, A0A0D3N4Z0, W5P3G5, A0A0D3A3H9, G3QW12, C9J5V8, F6T2V7, K7FCZ9, A0A0D9RGK7, H2QNK5, I3MGC0, G1LVA5, C9J2N0, E0XJL2, G3X3P0, H3ACY3, H0XBC5, U3BGM3, A0A0D3N5K0, G3RM88, M3XTZ1, F6T2W1, I3L660, C9J712, R0KYD1, G1PZL7, Q5R4E2, G1SQ87, F7EGP4, Q4R4P8, F7HQR0, U3JRT4, H9ENP1, U3JRT3, A0A0D3N625,…	Profilin	InterPro
TMEM256	-2.46	UniProtKB	E2R9L6, G1SP49, Q8N2U0, M3WSW8, F7DUE9, Q2KI29, H2NSJ1, H2QC36, I3LRP5, F6V825	Uncharacterized protein	Ensembl
TXNDC17	-2.46	UniProtKB	G1TBW1, F1RGM3, C5IWT7, Q5REA8, G1LKG5, G3TY77, U3JQ03, G3QKM5, F7GVK7, A0A096P2L1, H0ZF56, I3N2Z4, U3IFS6, Q9BRA2, M3WT37, H2QC11, F7GR41, F6RTH0, G3VQQ4, F6XYQ5, F1MHF7, M3YIT9, G1RDF1, R4GMD9, G1PGR3	Uncharacterized protein	Ensembl
ZDHHC1	-2.46	UniProtKB	U3IPI7, W5NYB5, F7DQT1, Q4THK8, G1T228, A0A087X984, G1QXH3, G3SG57, G3SUN0, A0A096NR08, H2L3R9, I3J5F6, W5KEE8, F6WW01, I3MRJ7, M3Y4H9, M3WNV2, H3AK23, E1BE85, K7FHC7, F7HKL4, F1S2J0, G3S107, Q4SEW6, H9GSI3, G1P457, G3QZH8, H9H0D4, H0WFK3, H2NR76, H9H0D5, H2NR77, H0Z5S6, S4RLR9, G1MG82, I3L202, Q8WTX9, F6WYM4, E2RJP7, A0A0D9QV70, H2QBB4, G3WHJ2, G3WHJ1, T2M8V3, U3JXM4, H9G652, W5MNJ7, M4AC26	Palmitoyltransferase	GOC
FAM47E	-2.45	UniProtKB	D3YWC7, H3BJN1, H3BKF1, B2RVF4, E9Q0Z5, E9PYM1, H3BK06, D3Z2U0, Q3UN37	Gene model 1381, (NCBI)	MGI
FN3K	-2.45	UniProtKB	H0ZB97, G1KU07, H2QE59, G1PNA9, F6TWG7, F6UZE0, G1SV41, M3ZAH7, H2NV70, H9FYC6, F1S006, H0X4N4, Q9H479, U3JDD7, M3YHJ2, F1MK10, Q0VC08, K7EUQ2, K7FQH1, F6U657, M3WJX9, G1MX32, G3TNR5, A0A096NTQ2, H0VGU9, I3LZL9, V8PHH7, J9NRK8, R0K8U8, F7B7S3, G3R435, E1BRW8, W5Q3U8, F6UJK2	Uncharacterized protein	GOC
LOC101867474	-2.45
LOC101925101	-2.45
TEX40	-2.45	UniProtKB	F6TGP1, H2RBN4, M3X0I2, F5H186, G1MHZ7, F1RQP3, G1TVD3, G3QG63, G3TPL1, G1Q8D7, A0A096N7L4, W5P9C7, Q9NTU4	Uncharacterized protein	Ensembl
ZNF579	-2.45	UniProtKB	F1PQF6, H0XUQ5, J9P467, F7ICI8, A0A0A0MVK5, I3NDM2, U3B943, I2CWJ1, W5LXW5, A0A0D9SE63, G1RHW2, Q8NAF0, F7H7Y9, G1TSG3, H9F072, F7ICM4, J9P170, A0A0A0MVW6, H2QH71	Uncharacterized protein	InterPro
ZNF593	-2.45	UniProtKB	T2MJB1, M3WUL0, A0A060KZS5, G3UUU6, U3JCA2, O00488, G1T6I5, A0A0D9S854, H9GPP3, A0A096NQ02, G3TMQ0, W5P5N2, R0KIC9, F1N7I8, H3A573, H0V6I0, G1RD95, D2GWG2, F7DKS4, H2PYD5, Q5ZIT0, F7I0I4, F6RU82, A9J4F5, G3QUM6, H0YS20, I3N288, K7FUT8, J9PB33, G1PFC0, H2N8G7, G1LV43, F6YD13	Zinc finger protein 593	InterPro
ATF4	-2.44	UniProtKB	I0FRY7, G1QEU7, A0A023PPK0, B5X2H5, F6V5T5, H2QLQ7, H9KY71, F7CPU4, U6DNT2, F6V5P0, A0A023PPS6, A0A096NK64, H9EV56, A0A0B2VTV6, V8P6E6, G3T8L6, W8AWX2, Q6ICP0, H9KVU9, H0ZIX8, Q3ZCH6, A0A023PPZ9, G1NIF6, M3WB57, K7FW93, K7BNF9, A0A023PP78, M9T1Z8, A0A0D9R1Y4, H0XLZ1, E3VJQ3, W8BLU6, F1PLQ2, H3A462, A0A075IM17, F7GFP2, D6WDB8, B6Z9S5, G3WM84, Q9W610, H2P4G1, P18848, U3I1S6, F1MXZ1, H0VUY0, Q96AQ3,…	ATF4	InterPro
DUSP3	-2.44	UniProtKB	Q5RD73, M3YE25, H2RGU9, I3LCX3, F7BEQ4, F7C5I2, R4GM93, A7YY43, W5P7E8, H2RGD0, G1R137, G3SGS9, J9P5Y9, F6RIF2, V8P155, B5BUI8, H0WBL0, F6QXM6, G1MTU3, P51452, A0A0D9S155, G3VW43, K7ES89, H3ARP7, G1P5Y9, U3CTF1, K7ELG5, G3TGV0, K7FFF3, U3EZI1, G1KD57, A0A096P164, G1TAT4, U3JDK1, I3MLP6, Q2T9T7, G1MJ09, H0YXK5, U3I4K4, E6ZI01, H0Y271, F7BA17	Uncharacterized protein	Ensembl
LOC101867352	-2.44
LOC102134934	-2.44
LOC102118112	-2.43
LOC102125499	-2.43
LURAP1	-2.43	UniProtKB	H0WD77, H0ZD16, G3SAE1, F6VDA3, U3K4F5, H2N7J6, H0WHG8, F1S3V1, H2PYY4, G1KZ66, M3YNF3, Q96LR2, F7FU64, G3SSW4, G1S3M6, E1B746, G1SNG4, D2HC49, E2RQX7, A0A096NEK0, G1NDS5, M3VUZ9, F6QWH4, I3MD86, F6PSZ4, W5NW22	Uncharacterized protein	Ensembl
MGST1	-2.43	UniProtKB	G3VGA0, M3WUX3, I0FN34, I3MA83, P10620, U3K4X3, C1BSN7, A0A034WE43, F1NT14, C1BLT3, V5I913, E2RHK1, H0ZQ65, H9F3W7, F7FGG8, W8C8P6, G1T5J6, W5QHB9, H9GL66, G3QV01, C1BM45, H2NGR0, G1NLF4, D2HA64, R0JZP2, U3FR99, K7D0X5, E3TCU4, G1QW63, C1C1S3, F7HY29, G3SQZ7, W8C4S0, F1MXY2, H2Q5J7, H0WX89, M3YJ73, F6U8C2, P79382, A0A024RAX2, C0SJM7, A0A034WJ11, A0A096NPQ3, C1C106, A0A034WRW6, F4YD18, K7FK60, Q64…	Microsomal glutathione S-transferase 1, isoform CRA_a	Ensembl
MYH14	-2.43	UniProtKB	H9F0U9, H0WM04, H2NZR3, G3TG15, G3VI93, H0UY16, H2NZR2, G3QJL2, H3AVX9, U3EZ92, M0QY43, G1M4C8, U3DJW6, M3VUJ1, J9NU82, U3EGC0, A1L2Z2, F1MM57, M3XSD4, F6ZQR4, W5PWH2, G1R0M8, H2R5W8, F6WDP6, U3FSG7, U3FEK0, U3F1Z3, U3D2G7, F1PYS6, H9F0V6, G3RQL2, G1M4F8, A0A0C4DFM8, A0A096MZH7, F7BV56, I3LIE3, I3NFP7, A0A0D9S4P1, U3FIU6, H9GMI6, Q7Z406, I3LV99, G3UN90	Uncharacterized protein	Ensembl
XIRP2	-2.43	UniProtKB	K7GK85, F6V199, H3AXT2, F1S1Y1, F1PCJ4, K7FY22, W5P2U2, F1PCJ6, F6WK18, H0XXD6, F6ZJF6, G3S9C8, A4UGR9, F7HEG7, W8BRQ5, F6X154, G1NUB1, G1L3A4, G1L3A8, H0VP59, F6ZJG6, H2R6F2, A0A034VDC1, W8BE50, U3IWI7, K7GPY2, A0A034VDZ5, M3XNR2, U3IWI9, A0A034VB80, A0A096NZ95, G3W075, G3W076, G3TE46, A0A034VB88, E1BL04, G3TT04, A0A0A0MQZ3, A0A034VCD3, F7EUA3, M3X6K1, I3N9B5, F7AXY9, A0A0D9RS48, G3RF30, U3JDB8,…	Xin actin-binding repeat-containing protein 2	InterPro
C1H1orf115	-2.42
LOC102120124	-2.42
SCAND3	-2.42	UniProtKB	V8NDP7, V8N700, V8N457, V8N434, V8N5U7, H9F5I5, F6Q028, V8NYK9, E1BJJ8, V8NNV6, T2MAP2	Uncharacterized protein	InterPro
BBIP1	-2.41	UniProtKB	J9P3I0, A8MTZ0, U3EYB8, H3B0Y0, M3WPF5, G3N2W1, A0A088ALU8, G1S091, U6DUL7, A0A088ALU7, G3WF86, I3LF23, F7CDR8, F7AYF5, F7F169, H2NBL0	Uncharacterized protein	InterPro
CBS	-2.41	UniProtKB	P35520, Q96V35, F6QYX0, J9P469, W5UIM2, A0A075GNH9, A7MBF8, V5G5S7, E1V413, G3WXK3, F6R0S5, U3JH19, F8JZS1, M3W1B1, C9JMA6, A0A034W0V2, G1RXD7, H2QL34, G1NP20, F7I7U8, I4ECL7, V8PBU7, H9EWI7, E2QXN9, H7C2H4, Q9N0V7, Q58H57, F1MEW4, M3XKQ6, W5PNA4, F6XLJ7, W5PNA9, A0A077M2A3, A0A0D6QL69, J9P7X3, F6SUE8, A0A0A9YMP5, E1BYG4, H3ADZ1, G1TE53, H3ADZ0, T2MGI5, D8LKG4, I1F7I7, H7C1W6, H7C2W0, A0A0A1WXJ3,…	Cystathionine beta-synthase	InterPro
HDDC3	-2.41	UniProtKB	Q8N4P3, H9FKX5, T2M9I0	Guanosine-3',5'-bis(Diphosphate) 3'-pyrophosphohydrolase MESH1	GOC
LOC101865345	-2.41
LOC102116649	-2.41
LOC102131430	-2.41
MARC2	-2.41	UniProtKB	G1T4V2, G1LUN0, Q9GKW0, M4AJM1, F7IIC9, P0C2C3, U3KC40, G1LUN7, G1LUN5, G1RU30, W5PUD8, F6UNC7, M3XY24, Q1LZH1, F1NXH1, A0A096MMN6, F1Q1E7, H0X635, I3M8B9, G3WBV4, M3VZH8, H2N3N5, W5NHY3, F7IDF9, A0A087XNS5, W5K4I2, A0A0D9RTK6, F1S9I9, X1WI34, H0VWK2, U3IFC3, Q969Z3, F7GE20, H3B0W3, G1PWM7	Uncharacterized protein	InterPro
MNS1	-2.41	UniProtKB	Q9Y8A9, A0A0C5ZZR6, A0A0C6AKM1, G1L8N3, C7GM82, F6WA31, H9GKR6, A0A0C6AA66, A0A0C5ZQD9, A0A0C6B2S1, F2QS32, A0A0C6AP45, U3KC81, A0A0D4SXE9, F1PWW7, A0A0C6B0J8, W6QEX2, A0A0C6B5M1, A0A0C6BA13, A0A096NM69, F1RZG8, A0A0C5YWP3, A0A0C6AD02, F6ZXH7, A0A0C6A8Z7, A0A0C6AH03, A0A0D4SYS5, A0A0C6A2Q4, A0A0C5ZYJ9, A0A0C5ZZA1, A0A0D4T878, A0A0C5ZJC5, F7D3Z9, A0A0C6A5T0, A0A0C6A8L3, A0A0C6A1A3, G3AEK7, A0A0D4T…	alpha-1,2-Mannosidase	InterPro
PIM3	-2.41	UniProtKB	I3N2B9, F6UFL3, A0A096NKV1, H2P4U9, E1BY69, A0A0D9QYJ0, I3LPN8, E3TD41, H9EVF0, J9P8L6, Q86V86, U3DM15, G1L643, H0Z0C9, G1QLI9, G3QFG9, B5X172, H0VSP6, G3N2F6, V8PBF6, V8PAQ5, G3TWA5, W5QEG8, Q9PU85, A0A0B2VQ33, M3X439, Q6P2J9, J9NU73, W5UHN2, K7BYJ6, H0Y2F5, K7FAA8	Uncharacterized protein	InterPro
SHROOM3	-2.41	UniProtKB	H0VPN2, H3AJ78, H3CBT2, A0A087YM45, F6UB66, K7FKE3, F6ZF89, H9FFY1, G1Q1K9, F7EN83, W5M858, F7GDF6, A0A096M946, A0A0D9QX38, F7H4U2, M4ACV9, F7H4U4, H0YTY0, H9FDB7, F1PE29, S4RV80, F7GAW0, A0A096MTQ2, H9FLL3, H9FLL2, G1T3C8, H9F7I3, H2MK39, F7GAW8, F1N643, G1P497, G1NB84, M3WHS5, I3N260, F7ENS9, H2PDP3, G3W3K2, W5M837, F1RYS7, W5L197, A0A096NFP7, H2QPR0, G3QQE2, H0WPB1, W5Q7D0, H2QPR1, M3YAH4, F1N…	Uncharacterized protein	InterPro
ANO9	-2.4	UniProtKB	A1A5B4, M3W7Z3, H2RGF5, W5UDW1, A0A0D9RF77, F7HVJ3, G3T8V5, F7HH38, G1RA07, H0Z8Q3, G1KXW5, G3VY92, G1LV75, G1MUT9, E2R5D9, F6WIV9, G3RKX0, F6WI48, I3MJB7, F7CA57, M3YB49, G3SAH7, I3LGT9, V8NCY2, U3KAL1, H2NC97, W5PCQ2, F1NZ17, K7FFN9, H0V1G7, H0XJH2, U3J3C2, U6DZK7, F7HH25	Anoctamin	UniProt
CST3	-2.4	UniProtKB	G1Q2V3, F6UCB8, K4P494, R4GLT1, W5NGY2, Q0Z8R0, O19093, O19092, V8NX38, A0A0D9RF55, O97862, I3NH43, K7AAK0, A0A096NVT3, G1SUE4, H0UWM5, G1LU45, G3TEB6, F6UBH5, D5MTH1, M3XPW3, H2P181, W5P887, G1RLM2, P01035, P01034	Uncharacterized protein	Ensembl
GGH	-2.4	UniProtKB	G3QXM2, A7YWG4, M3WHF8, G1P8Z5, F7G3H4, A0A0A1XRN7, G1NF82, Q92820, G3WB66, Q4U3Z4, F6XZT6, G3T7P8, V5G509, G1SIW5, W5Q5P5, H2QW82, W8B2C3, G1QUN2, M3YEJ9, B5XC50, H0VAN0, B5X6J2, F7FU03, F1RTA3, C1BL01, I3MKQ3, F7E4X1, H0XE30, V5GM31, G1KT97, G1MIG2, U3JSK9, G1MIG1, T2M871, A0A034WPA3, H2PQE8, A0A061RTZ5, A0A096N973, F7CAQ5, C1BRE6, F6R3K0, U3ITM9, W5UCB8, A0A0D9RP90, F1NR48, K7GBF8, E2QUT9, H0Z…	Gamma-glutamyl hydrolase	InterPro
LOC101867001	-2.4
LOC102119656	-2.4
LOC102127328	-2.4
SARS	-2.39	UniProtKB	G3X052, G3TIA7, G1PB92, H9FY84, F6YEX7, F1S5Z3, A0A075GPD5, A0A075FTB3, H9H1X3, U3DNS0, T2MFH8, G1TXX6, A0A075GFU9, A0A075FJN4, A0A075HKJ8, P13642, A0A075G7P4, G3UEC3, A0A075H1Z2, A0A096MRT1, U3IYL2, A0A075G9A4, A0A075G5X3, A0A075HKX1, A0A0A1WKE4, F7EIJ6, F7BTP3, G1SVJ5, K8YR20, A0A075G1R1, A0A075IAB4, G1QQH6, A0A075HQX0, M3XV23, G3QHA2, H2R8T9, H0VTZ8, F7IHE1, F7IHE2, P49591, F7CZS4, A0A075FWS9,…	Serine--tRNA ligase	InterPro
CDC42EP1	-2.38	UniProtKB	K7FPN2, E2RJI7, H0V502, Q00587, F7B9V2, B0QYC8, G1RXM2, B0QYC7, B0QYC6, G1NIX5, M3W6C8, J9P045, W5PWB1, G1LTW3, G3WV48, H2P4A9, Q17QW1, G3TX33, F6XMH9, A0A096NJW5, H2QLM2, G3QMF1, G1TLM2, I3LT56, U3KEH0, K7DJF8, G1PHX8, F6TPT9, R4GHJ5, G1KRM8, J9NUT4, F7HFX4, F7DER8, H0ZJZ4, M3YMW1, F7HFX6	Uncharacterized protein	Ensembl
ITPRIPL1	-2.38	UniProtKB	F6UHY6, H0WV47, F7A9W2, Q6GPH6, H2P549, A0A096NPE5, H9GVE6, M3Z4K9, H0V4K1, G1Q7V3, F1MLM6, J9P3Y0, F7IP84, G3UJE8, I3MGG9, G1MLZ7, G3S882, G3X2A8, W5PWV2, M3X624, F7I775, K7G713, G3RYQ1, H2QIC9	Uncharacterized protein	Ensembl
LOC102127438	-2.38
RGCC	-2.38	UniProtKB	J9PBD6, F6R160, H0ZQ92, G1NTW2, U3K038, U3DSZ1, H9YXH9, H2NJR1, G3SRZ7, M3XS00, U3IQW2, H0XAF8, A0A0D9RZ12, G1K943, A0A096MW38, I3NBD2, G3QJT1, M3XG74, F7DMA6, F6T954, H3AVL3, G3X1Q9, W5PAZ0, F7ERM4, G3RW65, F1NXF2, Q9H4X1, H2Q7H3, K7G1X6, H0VTG5, G1QKR9, G1NQ22, K7AW62, G1T8C0, G1LQ49	Uncharacterized protein	Ensembl
SCRN1	-2.38	UniProtKB	F7H4J4, G1RYM6, G3QSH3, K7GHF3, H3AMF3, H0X3Z6, P83939, G3U784, F7GFN0, G3TJ04, H9EW42, F1N8X7, G1K8W8, W5PG20, A0A090N7T9, I3MCT1, G1SE39, G1NE79, F6TY77, U3I9W6, C9K052, F6VI17, G1LGD8, F1SIG7, M3Y0T9, H2QUC6, F7CYS6, H0XUD0, C9J7U9, A0A096MSI2, K7GHE1, V8NF55, B8ZZP4, Q12765, U3K3X6, A0A0A1XCF6, A0A024RA21, M3X3B0, H0YXP5, A0A0D9RPP8, G3VPK2, M3ZC85, H0V8Z1, G3VPK1, F7H4P2, H2PMI3, W8BWY8, G1P…	Secernin 1, isoform CRA_a	InterPro
BAG1	-2.37	UniProtKB	Q9LIB3, D2HUA6, G3W863, G1PH96, G1N4Y2, H0ZCY0, J3QTA2, M3WPQ1, U3JHC5, H9FXK2, U6DF27, F7H9T2, C9JYK5, V8NVL7, Q0WUQ1, F6S0E7, Q99933, H3ABL9, F7HUV1, K7FGG1, H2QX50, F1PGZ0, F7D6F9, T2M6L3, F1SE85, G3RK71, A0A0D9RC17, H0V0X8, H2PRX9, R0JKB8, I2CY24, A0A096P1C7, F1NPL0, W5PIE7, G1QZC7, V9IQN5, G3T925, Q148J7, I3MW18, H0WH57	Uncharacterized protein	Ensembl
DALRD3	-2.37	UniProtKB	G1Q750, H2ZX15, A0A096NQQ4, G1R4T0, F7ES19, A0A0D9RRV9, A0A0A9YDP9, G3WPF8, G3WPF7, G1KM93, G1U345, M3YS71, F6W4N3, V8NU68, F7DTU1, U3KF55, F1NHJ8, G3QG06, F6VY40, H7C0T8, H2PAS8, U3IH24, H0W1T1, F6W4T3, F6ULS6, F6VSK1, H0ZFE6, G1M2W8, T2MBU5, C9JJG6, W5Q279, Q5D0E6, H0WNT2, G1N8T4, M3WC82, F7F095, F1SKI7, A0A0C9RU47, I3LZ78, G1TE99, G3TA59	Uncharacterized protein	InterPro
DUSP8	-2.37	UniProtKB	G1L4R8, G1U0I3, G1L4P6, F6T0Z5, A0A0D9RC32, K7G8V6, H3B572, E1BPA6, H9H7B0, G1L4R4, F1PEI4, U3IQU3, G1RS66, G3UCL1, H0WAD1, M3Y403, H2NCE0, G3QDB0, G3N1Q8, H0XPE6, G1N8Q9, W5UDN7, G1L4Q9, W5P5R9, W5P5R8, U3KB57, H2R3V6, G1KIR6, G1L4S1, U3BVM3, F6UN67, R4GDI9, E1C2M2, G1L4S5, G1L4Q0, K7EBR9, H9EZS8, A0A096MXJ3, H0ZGN3, F7BD73, M3WYG8, Q13202, I3NHG6	Uncharacterized protein	GOC
HRSP12	-2.37	UniProtKB	W5P8I3, U3JT39, K7G3G2, A0A024R9H2, H0YBX3, F6VML1, A0A0B2V9E1, Q3T114, G1L170, G3QFT9, A0A0D9SE17, H2QWH5, M3YUY4, P80601, F7B859, U3J3U4, A0A0E9BG69, T2MFM6, H0YB34, I3N7V1, A0A0E9B446, G1Q9C4, U3FHY9, G1QQ41, M3VY13, G1KS26, G1NHU5, F1S0M2, E1C7E1, H0ZP41, F6VKH4, E2QS94, F6ZTJ8, P52758, G3VD69, H0VRQ6, H3AW97, F7A6J6, H2PQW3, H9FNK5	Heat-responsive protein 12, isoform CRA_a	Ensembl
LOC102121717	-2.37
LOC102123985	-2.37
PPP1R3C	-2.37	UniProtKB	H0ZDU6, G1NQY2, F6XAD6, M3WBI3, F7G593, G3R0E7, Q9UQK1, G1T8M0, U3FUJ9, H9GD62, H3ABW0, F7CCR6, J9PAD0, M3Z0L5, Q0VCR4, F1P1X1, G3U8P1, G1PYF0, K7CP68, I3MYC7, H0W532, W5Q3Y1, G3X3K1, A6P3D1, H0XDX6, K7EXS4, A0A096P5H4, U3KKW2, H2NB02, G1MKB8, A0A0D9R2Q3, R0LJ07, H2RGP1, F7BNP5, G1RPF2, F1SCX0, F7GL21	Protein phosphatase 1 regulatory subunit	UniProt
TPMT	-2.37	UniProtKB	Q3BCR2, Q3BCR1, Q3BCR0, Q3BCR6, W5KSV1, Q3BCR5, Q3BCR4, Q3BCR3, F1RUH7, A0A096NL58, A0A0B4J2I0, Q3BCR9, Q17QQ2, Q3BCR8, K7B599, Q8HYE0, G1DFS2, W5M6T8, F6PNF2, U6CVB4, Q8HYE1, H0WWY5, K7G0L6, F6XB36, G1SKJ6, G3WQ88, H0Z767, M3ZXW2, F6TPF9, C3KHE3, U3KGC6, C1L5L6, C1L5L5, A0A060PPT3, Q3BCQ8, G1PUC7, I3LYX6, B5XCX0, M3Y0Y6, F7BAR2, U3IFA3, A0A024QZW0, Q8HX86, H0V547, G1MUQ3, M3W1W1, Q6EIC1, G3NFB9,…	Thiopurine S-methyltransferase, isoform CRA_d	InterPro
ALDH1L2	-2.36	UniProtKB	H0VH13, F6UZX8, F1SG41, F1SG42, H0WQT0, H2Q6R9, H9FA78, E2RC62, G3R6S5, U3IKR7, A0A096N2X9, G3SB56, Q3SY69, G3W3G4, K7GFA4, H9FG38, G3TCQ3, U3KG77, G3U5Z0, W5UBE4, V8NWT4, E1BDG9, M3VWP3, F6YQB7, H9FK33, G1KRQ0, H2NIH0, A0A0D9S2G4, M3YKZ7, H3A505, G1LK01, H0ZLI5, H0YHN9, F6VTK0, T2MCX1, G1P8Y1, G1R4A5, F7H088, I3MBQ0, A0A087ZYB7, W5Q6G1, G1NJU7, G1SS37, F6W9P8, F7CYD2	10-formyltetrahydrofolate dehydrogenase	InterPro
EXPH5	-2.36	UniProtKB	G1PBP4, I3M4H1, U6CX30, F6ZE19, Q149M6, F1P780, H0XT80, G1NQH1, F6VNL3, F6UR91, M3Y3I2, G3W8J7, A0A096NZQ1, G3QG01, G1LRS5, M3XEM1, J9NT90, G1TCB3, Q8NEV8, F7H0F6, W5M1X6, F7I658, G3T2R2, G1KYF5, F6WH31, W5PSK6, F6R2X0, U3I0J7, F1MGW8, F1SV17, G1R6K9, H0VT41, U3JCF6, F7FH88, H2Q4Q3	Uncharacterized protein	Ensembl
GOLGB1	-2.36	UniProtKB	Q3YAS6, M3Y0H6, G3R443, U3K7M1, F7FZ72, K7B9K9, G1QC92, F6Q6L0, G1MU61, H0Y867, F7HTR7, C9J8Q0, U3IPL5, H9FT64, I3MUM4, U3BKU1, I3MEP5, F8WF12, F1SQ16, U3DUN6, K7DC20, G3TE09, K7G9Q9, H0V7Q2, H7C5I7, E1BKZ5, Q14789, W5QFP3, G1T3D1, U3C5G7, U3F0I2, V8NL40, F7FS54, E7EU81, G1QH48, F6WPQ1, G3W9N8, V8NRZ7, U3F980, A0A0D9R4M0, H0XV95, Q6PG47, G1M925, G3W9N7, F7E9C5, K7C414, A0A0B8RVV9, U3D0T0, G1KAE1,…	Uncharacterized protein	Ensembl
USP53	-2.36	UniProtKB	H0UVY9, I3LHM5, H9EX64, W5UD01, H0YUI1, H2LIR6, U3IZ91, V8P6S3, G1MEU4, D6RF54, W5K4B1, W5Q4W9, U3JDR8, F7IGQ9, E1BSS2, U3BU67, H3D176, F7AEV3, E2RQX2, F6XR25, A0A096M3X2, Q70EK8, G1NE64, G3TF89, K7FX54, M3Z150, G1PSE0, M3WKS3, F7E1Y8, F7GAR0, H2QQ33, G1RCP5, H3ASD9, H2PE73, F1N2K3, I3JL50, H2TBL9, H2TBL8, F7IEG8, I3M3S7, G3WBS8, G1KNQ7, G3WBS9, H0XDF6, G3Q7F9, A0A0D9QUT0, W5N4A0, G3QUD8, G1T610,…	Uncharacterized protein	InterPro
WBP5	-2.36	UniProtKB	H0W2Z1, F1RYE3, H2RH34, M3X6C1, G3N0M4, H2PWC5, W5NQ78, D2HTN9, G1SK90, F7H6L2, Q9UHQ7, F7B998, G3SGY0, F6VGS7, G1Q4F8, J9NU14, A0A096N283, I3N4J1	Uncharacterized protein	Ensembl
B4GALNT3	-2.35	UniProtKB	H0ZQV4, G1K862, F6RQ71, A0A096N7I0, G1NL13, G3UM38, H0WID7, H0VI36, M3Z2V9, G1SV46, G1PCU3, Q6L9W6, M3WAH5, F6RES2, F6R451, G3WVD8, H2NG26, F7FU82, U3JMS8, F6UDD9, F7DVM5, F1N0M7, A0A0D9RHX1, G3RNT9, W5PRD6, G3QJS9, U3I4T5, K7FJ00, G1LCM3, G1QNZ2, H2Q564, F6ZWW1, H3AL14, F6XXV6, G3U737, A0A096NCJ3, F1Q4I7	Uncharacterized protein	GOC
CGNL1	-2.35	UniProtKB	Q0VF96, G1R4T1, G1LVP9, E2QV06, H0WNY6, A0A096NM72, G3WPT6, G5E5V6, K7FQZ3, G1N1X0, I0FII9, H9FGN9, H9FMA4, I2CXS9, H0W331, G3TFS2, E1BYS5, H2NNC1, H9F6P7, R0LMJ6, M3XZ89, K7CC29, A0A0D9RHM1, H0Z780, V8PGN6, H9GL85, I3MQH2, F7CYU7, F7E484, H9FGC8, G1SK43, U3KCF3, G1P6N5, H2Q9I0, F6ZQS4, W5QI76, M3WP88	Uncharacterized protein	InterPro
LOC102122805	-2.35
LOC102138058	-2.35
MEX3D	-2.35	UniProtKB	H3B9R2, W5PRX2, I3LKC4, H3DCZ5, G1QM95, H2NWU7, M4AY12, I3NDI2, H0VVR7, H2MK65, G1PVX0, F7HT27, G3S3H6, H0ZC00, H0YPK3, W5KGM1, H9H5S1, Q86XN8, G3PRD9, H2QEU9, H9FIG9, G1MTW0, F1NVL0, K7F9D2, A0A0D9RHS6, G3QFJ4, H2T5E6, H2T5E4, A0A087Y5W8, H2T5E5, F6VDX9, H2T5E2, F7IH90, H0XZT6, H2T5E3, S4R446, F1PZ81, A0A0A0MVE8, I3JVF3, F6T040	Uncharacterized protein	InterPro
PLLP	-2.35	UniProtKB	H0XBE9, M4AEZ0, A0A087WYE0, G1QCL5, G9KHB7, F7H4F3, G3WNY0, H2NR00, H0Z4A2, F6PHI3, J9NSC1, H3AZU7, G1MUX8, Q9Y342, S4RZ08, H3CTU5, W5MLT2, D2GTW8, A0A024R6T3, A0A0D9QY07, M3VZF2, A0A096MEC2, F1MXU1, H0W911, F1P9U7, G1SSV7, G3PL91, W5QCB7, A0A087Y4J1, A6H7B0, H9GBW1, F1MU31, I3MF50, U6D9G4, F7FG77, K7GCY3, F1RF33, J3QLJ3, U3BFH4, F7DRN4, G3PL89, C1BJ60, G3RTG2, W5K748, U3IZA2, F6VIY8, G3T282, A0A…	Plasma membrane proteolipid (Plasmolipin), isoform CRA_a	Ensembl
SLC25A5	-2.35	UniProtKB	H3AR27, H2PWL4, G1PT15, F7H7Y6, G3TTB1, V8NFJ3, F6ZC39, H0VE35, A5PI51, K7B2A6, A0A0D9S0H6, G1RXU9, G1N715, W5UIV2, G1T524, F1NJ10, H2RG37, H0XSW6, H0YYP4, U3KPH3, G3VTR0, A1XEB0, U3JFW3, F1PRL5, I3NHB6, Q6NVC0, P05141, G3REE3, W5Q436, L8J1L1, F7BIR2, Q000K2, K7FGY5, Q5R5A1, M4AFG5, U3IXX4, Q8SQH5, C1KK05, G3N3W3, A0A096MZH6, V8NH17, C1KJZ4, C1KK01, F7GUA1, M3W704, C1KJZ9, H9GJB1, C1KJZ5, C1KJZ8,…	Uncharacterized protein	InterPro
ZNF462	-2.35	UniProtKB	W5LG04, H0WJ07, A0A087XX16, W5PBC2, A0A096LSQ0, E2R531, U3JJP7, G1N713, F6TW63, H9FJJ3, G3S4M6, M3W1T5, H0Z7I5, G3PW60, F7H0U2, G3ULI6, H2TDW4, A0A096MI35, H0V5P7, H2PSZ0, G1S688, H3BLX4, H2TDW5, H2TDW6, K7EVS1, H3DN09, I3LK81, U3B8G6, H2LLU2, G3R0K4, A0A096P0Y6, W5MV01, G3T966, F1MIB3, E1C5J4, G1MF50, F7IRY7, Q96JM2, G1T3L7, H2QXN1, G1MF44, G1PI35, F6UL46, F7ICL4, U3IZR7, A0A0A1WTT5, G3W263, I3K…	Uncharacterized protein	InterPro
CMBL	-2.34	UniProtKB	I3L8S3, H0XGD9, F7GKB9, W5PXJ8, U6DR55, G1Q4E3, G1KAZ5, F6Z9U4, F6XDU1, F6UL42, G1RLJ6, Q4SMY3, G3RE16, G1N332, C1BWH0, H2QQM8, Q3T141, R0L8L1, G3UEI7, K7CFW7, M3X3U3, G3VEG2, F7GD97, A0A0D9RXL6, U3DFD0, Q5RBU3, E6ZIK3, H0UXK7, D2H9W7, F1N2I5, M3YII9, G1SQA1, Q96DG6, I3MZW6, E2RF91, E3TF52, A0A096MSN0	Uncharacterized protein	GOC
LOC101866164	-2.34
MMP7	-2.34	UniProtKB	F7FE85, G1LU30, E2R288, F6T7U6, S4RUI1, G1PAT7, A0A096N6P6, B6UV58, F7F738, F1Q2W4, F1MU56, A5GZ72, G3RIL3, I3N3H1, H2NF31, G1T972, G3WHN6, P55032, W5P7Z3, F7HG57, H0XKL4, F6TAQ4, P09237, G1R6B0, A0A0D9S1T7, F1SV71, F1PU00, U6CUP9, H3B6G2, G3SRF6, Q5ZMQ8, Q4JIK0, M3Y706, Q148N3, H2Q4M7	Uncharacterized protein	Ensembl
CISD3	-2.33	UniProtKB	W5PIV9, G1Q575, R4GL96, F7HWD1, F6U310, G1LCJ5, D3PHR6, V5GCR5, M3YUL0, G3MWJ2, M3YUK9, G3RSK9, G3Q254, W8BHZ0, T2MHK8, A0A096P571, P0C7P0, H2RI55, H2ZRL2, A0A034WG57, G3Q252, H2LBU9, A0A0B2VJK5, I3N7J2, G3UDN3, R4G9Y5, I3LIT8, I2CY81, D3PGU8, A0A0B2VEP5, G1QID4, H0XL60, I3LUF9, M3WZE3, H0UC71, S4RBL9, F7HFT1, A0A0D9S3G4, W5N8B2, J9P260, G1Q828, G1TKA2	CDGSH iron-sulfur domain-containing protein 3, mitochondrial	InterPro
ND4L	-2.33	UniProtKB	A0ZPV9, H6WCB8, A0A059QPL2, D1YUE6, C9D8C8, H6UCF6, U3N6J3, I2DA71, Q199I0, J7HTR5, K0A2D5, F1AWH0, C7SFN8, A0A059QPM9, F1AWI8, A0ZPU6, A0A0A7DEV9, B6DCH5, D7PEP9, F3Y694, Q94PY6, Q94PY7, Q6L8D3, H6UCE3, R9QAZ2, A0A0C5KAV0, H6WCA5, Q6R682, F1AWI3, J9PP08, A0A0A7ADE0, F1AWF8, A0ZPT3, A0A075CNE0, Q2QI37, A0A0A0Y6Z1, M1S1M9, Q6R695, C9D8E1, Q199K6, E0WCF0, A0A0A0VAR3, E9P2C9, A0A0A0VB32, K0A2H0, A9L…	NADH-ubiquinone oxidoreductase chain 4L	UniProt
SLC5A2	-2.33	UniProtKB	U3JFB4, P31639, H9GIG5, A0A096NHZ7, F6REJ5, H0WKJ5, Q6XUI1, M3VWJ6, G3SWT2, H3AF65, H2NS01, K7FBU6, G1MCS8, C0LU84, H0ZZ74, G3QP83, H3AF66, F6S4E1, Q8WY15, E2RT90, G1S306, I3LKT6, G3WLY5, H0VJE4, K7GT19, K7GL44, K7GRQ7, A0A0D9QZY7, P26430, F6X722, G1PII2, K7GQI2, W5PIR1, G1U7W5, M3YIU4, I3N1K6, F7CJ42, H2QB06, F6X7C6, H3BP44	Uncharacterized protein	InterPro
UBC	-2.33	UniProtKB	B5M6P2, A0A0B8RT13, J9NVT1, P0CH28, K7VWH8, F6YM88, D2HFP2, P0CG61, A0A060RV27, G1QQ52, U5S8M9, Q5UQC9, Q9M4R0, Q5UAG0, W5Q9W5, A6YED3, B6V3I3, B1P769, A0A0A1ESW4, O48555, Q42973, Q42897, A0A096N5X5, Q677E9, P27949, I3VF85, Q84QC6, Q96C32, P25869, Q5PY61, P0CG48, E1B9K1, A8CGI2, V5NG23, D7UTH3, P0C8G3, P0CG64, P0C8G4, P0C8G5, P0CG68, P0CG66	Ubiquitin conjugating enzyme E2, putative	GOC
AGFG2	-2.32	UniProtKB	F6ZQA4, G1SVK2, H9H3T7, U6DB91, A0A0D9RZ95, H2QV31, A0A0C4DG34, K7FGM9, F6ZPX7, W5L0T7, K7E7M5, F1MS35, G1PEG7, A0A0C9RW51, A0A096NNX9, A0A096NNX7, A0A087XWG8, W5Q5R6, U3EMM1, M3YW61, H9G5U4, G1RM50, F6W225, U3FRS7, T2MIB4, F6VXR9, F6ZPG1, H3B397, F6W2N3, U3DBL2, M4AM62, G1M8Z8, G3RCW6, H3CXR7, G3RCW9, H0X387, I3MA28, H2PLN8, W5N708, J9NUD1, G3VC79, H0V7G8, O95081, M3W6K7, F1RMY4, G3THZ4, E2RB22	Uncharacterized protein	InterPro
AHNAK2	-2.32	UniProtKB	I3N4Z7, G3VTL4, F7H4K7, F6RD36, F7EZ58, G1Q5X8, G3UFM4, G3RZL0, M3X028, F7APF6, G1U2A6, W5PE67, Q8IVF2, A0A096NK36, H2R948, F6QJ68, H0Y198	Uncharacterized protein	Ensembl
GGCT	-2.32	UniProtKB	A0A0D6QQ67, F7E4R6, U3FNA1, M3WBE2, U3I6R8, F6R3P2, G3VJ93, H7BZK5, Q32LE4, O75223, A0A0B4J1Y4, H0Z0E1, A0A034WUZ3, G1NWX8, F6TMI5, A0A0A1X6Q8, H2PMH5, U3K3A1, E2R9K5, F7E821, F1NZ09, E0V865, F7AB10, F7GU22, W5PE54, E3TED7, W8BQN4, B8ZZK2, G1SNK5, W8BLZ2, V8NIT8, G1RYS2, H2QUD2, F6RR67	Gamma-glutamylcyclotransferase	InterPro
LOC101865939	-2.32
SPCS1	-2.32	UniProtKB	Q3T134, A0A0A0MXR3, F6SRE0, C1C1A0, B5KFM9, P83362, A0A096MXK6, F7AXV6, H9FTD6, C1BNH2, E3TFP0, I0FR32, G1R6D7, G3RSY2, A0A0D9RLH9, C1BIF7, Q5RF96, X6R2S6, F6TL50, F6U4C1, G3TGA2, W5NVK4, M3WUM5, K7FWE9, C1BSI6, E1BX11, U3K2V2, U3IB86, G1SJF2, Q4SRD1, M3XJR6, B0FWK4, T2M2I4, G1MQ67, A0A0F8AXQ0, C9JBL1, C1BWM8, F6V6C9, H0W9L6, C3KHI0, H0WP68, Q9Y6A9, G1LP81, I3LWG8, C0H704, F7H6U6, H2QMS4, G1NTZ9,…	Uncharacterized protein	InterPro
IRS2	-2.31	UniProtKB	F6X610, F1P2R4, M3YIA6, F1MJE0, Q96RG5, H0ZED4, Q96RG4, G3UCI1, J9NXW1, G3WQC7, G3SAW7, F1Q219, G3UFK1, G1NPS7, M3WWW7, H2Q7S8, G3RHI8, W5P7B6, Q9Y4H2, F6RR27, W5NMP3, F7DE94, G3TIF0, H0XQF6, B9A1S3, A0A096MM02, U3JKK5, H3B7F9, G1LWZ0	Uncharacterized protein	Ensembl
LOC101925228	-2.31
LOC102132574	-2.31
MON1A	-2.31	UniProtKB	Q17QV2, F7EIN6, F1Q3A6, I3LLG1, F7DQX4, X6R3V9, Q86VX9, H2QMM9, F6YD65, F1NBQ4, G1KHU2, A0A0A0MSQ9	Vacuolar fusion protein MON1 homolog A	GOC
WWC1	-2.31	UniProtKB	H0VJT2, F6SW62, H2QRY9, K7G638, F7GYN0, U3K511, W5KHD8, I3MP58, H2PHA9, U3I6R5, F1PTL3, G1KDB0, A0A096MUE9, H0WU15, W5PYI8, G3QXZ1, H0YTC9, F7DPP5, F6ZMR3, Q8IX03, F1N3I6, G1LKC6, G3TYL4, G1MU44, M3W726, G3WQ95, M3YNQ5, G1SK02, E1BZA4	Uncharacterized protein	Ensembl
KRT10	-2.3	UniProtKB	F7B5E6, G3QDX0, F7B5G7, Q6EIZ0, I3LZY6, A0A0D9S2X0, G1QNX1, A0A096P5I5, H2QCX3, W5Q160, H2NU64, F7C3I4, G1LNQ2, A6QNZ7, H0WM31, P13645, D2HR29, G3U8C3, G1LNJ4, M3YT67, F7BV15, E0X638, F1PYU9, M3VXR1, G1LNT6, I3LDS3, G1P6A9, P06394, G1T1V0, V8NBW2, D2HR31	Uncharacterized protein	InterPro
LOC101866521	-2.3
LOC101867208	-2.3
LOC102139371	-2.3
TOB1	-2.3	UniProtKB	F6VGD4, M3Z8P2, F6V783, B2BE68, G3SFP3, W5P2V8, P50616, G1N920, F7FBT1, A5D9F9, G3T153, F7A269, F6TP49, G1K9Q9, U3KL30, H0XQW1, I3M8R3, H2NTM2, D2HTT8, U3C601, H0ZG06, F7GFK0, G3WT12, H0VCI6, G1QFU3, G1R8T2, H2QDG0, R0LQ97, A0A096P4L7, K7F1J3	Uncharacterized protein	Ensembl
LOC101926650	-2.29
LOC102137536	-2.29
LOC102146242	-2.29
SIK2	-2.29	UniProtKB	G3WNI4, I3MA88, V8P3I0, Q9IA88, F1MKW8, E2RCU0, I3LG21, W8B381, H0X7E5, G1R6N7, H9GBK7, V8P2L7, V8P3I5, K7C495, F7FKT7, G1PGG7, G1T4C5, A0A0D9S2Q7, H2NF94, A0A034WES9, I3LMN9, A0A0A1XES8, G3RWJ5, F6T428, U3J2C6, H9FRV7, A0A096NXM3, H3BHP3, H3BHP2, H0YPZ7, G1LCA8, M3WN10, F6ZPR3, M3XWI3, A0A096MM32, H2Q4R3, V5G765, Q5REX1, Q9H0K1, U3FUB5, T2M5W2, G3UJR5, G3TVL6, H0VNN2, K7GAN6, U6DM20, G1MPW3, B2Z…	Serine/threonine-protein kinase SIK2	UniProt
C1H1orf226	-2.28	UniProtKB	W5PLP4, H2N4Z2	Uncharacterized protein	Ensembl
ENDOG	-2.28	UniProtKB	H9EY07, F1RR64, A0A0D9RPL8, F6Z656, H2R675, M3W4U7, G1TKJ9, K7GJP3, G1S790, P38447, H3B6R3, M3YNL8, U3JFC8, A0A096P0I8, G3UKE6, G3X3M1, U3IB65, B0KWD9, E2RQB6, G1MBE1, H0Z176, G1PPS8, H0XSY5, H0WA37, H2PTK7, G3RE94, W5PHY0, G1MZB6, Q005U7, G3S1Q6, F7FGU3, G1TZB8, Q14249, I3MUV5	Uncharacterized protein	Ensembl
LOC101866419	-2.28
DUSP1	-2.27	UniProtKB	G1QHS9, G3VH35, P28562, F7CQH8, G1SU91, F6ZID5, Q2KJE3, F7CQH2, F1MI99, F7IHX9, U3K2F1, H0YPV2, F1NPP0, A0A0D9RB59, A0A0B8RZL7, J9P4Q2, G1PEG1, K7GSI5, H0VNI4, H2PHD7, H0XGR3, M3X8G8, H2QS06, F7FS85, U3J624, A0A096NAU6, G1MWV5, I3NF73, G3QW32, H3B1I0, F7FLP2, G1KQV7, W5P1D4, U3FNS0, V8NAZ0, G3T0K0, M3YMU4, K7GKU2, D2H5F0, F7IHY0, F1RS00, W5ULY3, K7FWC5, K7GSL8, V8PH20, F7FMB5, F7ES52	Dual specificity protein phosphatase	GOC
HYPK	-2.27	UniProtKB	Q9NX55, Q2PFU1	Huntingtin-interacting protein K	UniProt
PINK1	-2.27	UniProtKB	H2N8R0, H0X8F0, A0A034VJS8, A0A0A1XEZ6, U6DCG1, H0VU48, G1N1L4, G3UI56, U3K7I4, G3SHB7, M3VVE8, F6YRH5, G3TBJ9, H2PY88, U3IJA2, Q9BXM7, W8BGA2, A0A096N783, U3FHM8, F7FR77, I3MQ55, H1A3D9, V5G2L1, G1SQQ8, B5X237, K7FC75, A0A096NZ31, G1L8D9, A5PJP5, G3RF52, G1PI55, F6Y023, G1R8X1, A4GRC2, A0A0D9S8C2, F6YRG3, M3YXD5, W5PH75, H9F4I5, F1SU10, F1NAN0, F7H674, E2RCD1, G3W205, G3W206	Serine/threonine-protein kinase PINK1, mitochondrial	InterPro
STUB1	-2.27	UniProtKB	J9NRV4, R0KF66, E1B7G3, G3RYV0, H0WNF3, F6VA90, H2NPL2, F6YL96, K7G5K6, H3AQC6, H3BS86, F1RG35, W5PVD0, A0A096NKH9, G1R9S9, T2M3P7, H0W5B3, H9FNL3, A0A0D9RIQ2, A0A0C9RF75, G3UGD4, A0A0F8B1A1, I3MSV9, G1NBN9, U3JPN5, H3BUD0, Q5ZHY5, V9GYH3, M3W9C9, M3YWZ0, F7DNP2, F1MUH4, D2HDX0, G3WAN4, H3BTA3, H9GG01, A0A0B2UY13, F4Y578, M5FHM4, H2QA80, G1PFY3, F4Y579, F6X127, Q9UNE7	Uncharacterized protein	Ensembl
MAN2A2	-2.26	UniProtKB	F6RWB3, H0YNG5, H0ZIL0, H3B7Y0, A0A0C4DGL1, H0YKM7, H2QA36, H9G8Z8, A0A0B2VYG1, H3B7Y1, F7HR95, U3K9F5, F7A987, U3FGQ7, E1BGJ4, F7BKQ6, F6V049, G1SH08, M3W597, G5E6X9, H0UWZ6, U3IC46, G7MVZ0, G1NE21, H0WSQ0, H0YLB9, G1RNL6, F1NXU9, F7AGJ3, H0YKT0, F1RMI9, V8NLC3, H9H5G2, H0YLL4, H0YML7, I3MNN5, G1M5B7, G3W786, H0YLU3, G1SX69, H2NP77, M3Z922, W5PSQ8, G3TZ25, H0YKH9, H0YKQ2, G3QYR7, A0A0D9RWW5, H9H…	Alpha-mannosidase	InterPro
ZNF81	-2.26	UniProtKB	H2QYI8, A0A096N7G0, H9F5J8, F1RW60, F7A343, E2RLN9, F7DNL7, M3YPR4, F1PQQ8, G3R5H9, F7A3G0, F1N1M0, M3WXA8, B1AJV2, G1M2F4, W5PSQ6, G1PIX7, G1QTD4, B1AJV1, U6D2G0, P51508, H0XCB3, H2PVH3, A0A0D9RMA7, F7AUE7, G1U9P6, D2H7P9, F7AFT7, I3MBY9	Uncharacterized protein	InterPro
FBXO44	-2.25	UniProtKB	G3TGM0, G3WA02, G1PL36, H0W037, W5NSJ2, M3X496, F1RF92, H2N942, G3QI63, G1LT01, H0X139, A7MBH8, F7EN02, H2R9I0, I3MEJ0, F7BAM9, F7EH41, M3YYB0, Q9H4M3, W5NSI9	FBXO44 protein	Ensembl
LOC101866468	-2.25
OCIAD2	-2.25	UniProtKB	G1LNM6, F6V1K6, K7GDP8, G1NTW1, M3Y2G8, G3SPZ6, H9GAX6, A0A096MV74, Q56VL3, G1TKS5, Q3SYY7, H0X3Y9, J9P0Y1, F6U2S2, M3WQE8, F6S308, W5Q9Q8, F1SE82, H2RA22, G3RD42, U3I7Y7, H2PD97, U3JKQ0, F7HTU2, G1NRK1, H0ZCA1, I3MNX1, G3X0Z6	Uncharacterized protein	Ensembl
LOC101926506	-2.24
SMIM10	-2.24	UniProtKB	Q96HG1	Small integral membrane protein 10	UniProt
C3H7orf25	-2.23
FAM46A	-2.23	UniProtKB	M3WQT7, U3I387, F1RQL4, E1B8X5, G3SQ23, U3JJ39, K7EXP7, M3Z324, G3QFV6, J9NSG0, F7G705, G1NLW5, G1KTS3, F7IH49, F7IEQ0, H0WMD8, H2RDW4, I3MU91, A0A096N161, G1M2D4, H9FBH1, F1NXT6, G3VWF6, F7AJW0, W5PBA4, G1PNZ1, F7G2W8, H0VC95, H2PJN7, F6Q9J9, Q96IP4, F7HD89, G1RPH5, G1SVW8	Uncharacterized protein	Ensembl
FZD6	-2.23	UniProtKB	U3B975, O60353, H9F1Y0, Q8WMU5, U6CT38, F6QFJ6, G1MD51, G1QUC0, G3VPF7, F7I7H6, Q765Y5, I3IU79, H0WKD8, G1NSW2, F2Y5F6, Q5ANC5, F2Y5F7, F2Y5F8, F2Y5F9, H3B2R2, F2Y5F2, K7FM15, H3B2R1, F2Y5F3, F1P0A3, F7IP54, F2Y5F4, F7G9F4, F2Y5F5, F2Y5F0, E5RGK8, F2Y5F1, F2Y929, C1C4G3, H2SXD9, F4YE10, H9F7I5, M3W3B8, G1KIU5, F4YE06, F4YE07, G3NMF6, F4YE08, F4YE09, G5EA13, A0A096P0Y8, A0A096P0Y9, F1MP23, A0A0D9R…	Frizzled homolog 6 (Drosophila), isoform CRA_a	Ensembl
MOCS1	-2.23	UniProtKB	W5NQP4, Q9IAA7, T2M4C2, U3K8I6, A0A034VXT1, H0YWB3, Q9NZB8, F6SWG8, K7GFA3, G3T1K5, H0WL74, A0A075GU93, F6URP3, F6S6H6, F8WCK1, H9F755, F6URL0, A0A075FWS2, A0A075H1X4, F1N8A1, H3AC08, W8BNT2, U6DI69, F7BN00, G3U1M3, W6Q4I7, U3IZD4, A0A034VWT8, G1SRG7, M3XNC5, Q9N1B2, Q9N1B1, Q9N1B0, M5C4L1, F1RVP4, Q9N1B6, A0A024RD17, A0A0F8B348, Q9N1B4, Q9N1B3, A0A0D9RFD4, G1NDK7, Q5TCE4, Q5TCE5, A0A034VZC3, A0A…	Molybdenum cofactor synthesis 1, isoform CRA_c	InterPro
NXPH3	-2.23	UniProtKB	I3NCV4, W5P7I9, H0Y0R5, G3R1J9, G3W0B2, F7FIL6, F7A6D3, G1KD92, H0V201, F7CEI4, A0A096P455, G1NRF6, G3U3E1, Q8WMJ4, J9P2Q8, F7CES0, M3YVB6, O95157, M3VYV5, G1M0Y3, K7F164, G1PAN5, G1T6D2, H2NVL0, E1BFE7, U3IHZ1	Neurexophilin	Ensembl
ANGPTL1	-2.22	UniProtKB	F6YHL9, H2N4K1, W5Q486, G3SYY9, H2Q0P0, G3WUU0, H9GJK8, G3RRW2, H0XBZ0, M3Y1C3, U3K0M5, E2RQY3, F7D058, F1S6Y5, H0VP91, G3UT71, I3NAX5, G1P8N5, F7EWV3, A0A024R908, A0A096MLA3, G1S061, M3X6Q7, O95841, K7FY61, G1M7S2, H1A465, G1SNB9, F6ZU50, E1BYT9, U3J4I4, H9EU04, Q1RMR1	Angiopoietin-like 1, isoform CRA_a	Ensembl
LAMA5	-2.22	UniProtKB	H2P2I4, K7AZ03, F7BXV9, F1MC13, V8NVR9, M3WNQ3, G3WN31, H9FE36, M3Y8Y0, H0VEZ0, G1N210, K7B8T5, H9FE89, G1NT27, U3IS46, G1TI64, A0A0D9RTE3, F7HK14, I3N8F5, F7HQI4, H3AL54, U3K7L1, K7F7N9, W5PVM5, U6D4E5, H0WHJ4, O15230, A0A096NNC4, K7D2I3, F6VAN4, F7GGL1, I3MWP1	Uncharacterized protein	Ensembl
LOC102115620	-2.22
LOC102124284	-2.22
LOC102142987	-2.22
LOC102146794	-2.22
FZD1	-2.21	UniProtKB	O57328, H2PMY3, U3IFV9, A0A087YQ58, M4B0V5, G3QDV3, U6DIG8, F7E9U1, H3AZ03, F1NGQ9, B0VXE9, G1QE18, C1L3T3, H9FCA0, G1SJB2, G1TUT1, W5MX40, M3Z5S6, G3U8W9, I3KYA1, U3CPV9, K7C2E9, U3CSJ9, H9FM65, Q59UH0, F7D747, G1SC52, F1PCN5, M3X4M3, H0YT73, G3X219, B0VXL8, A7MB15, I3ML35, K7BSB9, B3EX09, Q59UM3, F7H7V5, B0CM30, H0XLY2, I2CXQ4, D2HY60, C0RW23, G1KRK4, W5Q571, H2R570, G3PMA2, A0A0D9SCP4, U3E710,…	Uncharacterized protein	InterPro
LOC101925397	-2.21
LOC101926461	-2.21
NXNL2	-2.21	UniProtKB	G1KSP9, G3VUR6, U3HZ60, F6PZK8, H2R6L8, Q5VZ03, Q4SQA3, H2PSL7, H0YQB7, A0A096P1X7, H0WB67, A0A087WXA5, G1L9B4, G3RVI9, M3YB03, A0A0D9R4R0, G1R065, G1TU74, K7GEY8, K7GEY5, W5PCS3, H9FF27, G3TPM6, B5XBV8, F7DSV4, M3WW70, B5XGY4, F7F4W5, F6VCM7, F6URM9, C1BXM1, E1BFN2, H0WK68, U3KD57	Nucleoredoxin-like protein 2	InterPro
SMIM3	-2.21	UniProtKB	Q9BZL3	Small integral membrane protein 3	IntAct
HGSNAT	-2.2	UniProtKB	G3SIH2, M3X793, K7BY75, H2QW44, Q68CP4, F1MF45, F1PRH5, U3J2W5, F1SE48, H9EWF5, G1LDY7, G1SUG4, G1NSQ5, F7DFB9, G1MZ84, F1NBK1, H0VNZ5, I3MTV3, G1KIL1, G3X2X7, U3JVJ5, F7GQS2, U3F7I2, F6Y7A4, G3SRF1, H2PQ87, M3YN16, H0WN44, W5P0U2, A0A096N7P1, K7FVY4, W5P0T2, T2MBP6, H0Z1L0	Uncharacterized protein	Ensembl
KDELR3	-2.2	UniProtKB	U3KDM2, V8PFP2, F6YBJ3, H9GDN1, E1BJK5, H2P4D5, H3AAP0, W6FSY3, G1NII3, G1LVN8, G3T4E9, I0FNT1, A0A024R1R0, M3VZ68, H0ZJG5, K7F8J6, F1SKP9, H0WIT6, K7F8J2, G1PM47, E2RA31, F6ZL33, K7CX71, U3J4A1, I3M0S3, H0W8S5, K7EFN6, G3VQY4, G3QZ17, E1C2R0, A0A0D9R2X3, O43731, M3YNU8, F6S5I7, W5Q1F0, H2QLN5, F6RQ33, G1SMX7	ER lumen protein-retaining receptor	UniProt
LOC101925555	-2.2
LOC101925591	-2.2
LOC101925779	-2.2
LOC102117076	-2.2
LOC102136444	-2.2
FBXW5	-2.19	UniProtKB	A0A096NRQ6, G3W194, Q969U6, A0A024R8H7, G3TQD4, G3QNY8, G1RBF9, F6WVI4, G1MQ91, F7C048, H0X8J0, M3VUN6, F6WX08, U3J9X5, F1NV20, F7DA50, K7G797, E1B9Q1, H0UZG8, D2I3X7, H0YW19, I3N5F7, W5NSP9, H9GCE0, M3YHR9, F6XGC7, H2PU07, H9FW16, U3JQY9, H2QY74, F1RVZ3	F-box and WD-40 domain protein 5, isoform CRA_a	Ensembl
KCTD3	-2.19	UniProtKB	C1C211, H2Q150, Q9Y597, H0YXF5, U3FJ84, H0XBX5, W5PKE8, G3SP56, M3XZC0, H0VAU9, G1SGG7, I3M6L3, M3XJK1, A0A0A9Y2Y0, A0A034VLY1, C1C370, F6VT76, A0A034VMU2, U6DGV1, G1MB78, W8BSR9, G1P3L7, H2N3Q2, A0A096MRS0, H2ZXP2, U3DJ30, A0A0B2UYZ9, V5GHP5, G1KU80, F1PPN4, I1G3V0, F6ZPV3, G1RW06, G3QHF9, M3W9Y1, G1SJR0, F6T3F4, U3EEP5, U3KCR8, G1NB57, K7F947, G3X3B6, F6Z7G2, F7FRE1, H0Y566, A0A0D9RSS0, U3IP66,…	BTB/POZ domain-containing protein KCTD3	InterPro
SOD2	-2.19	UniProtKB	Q4S6V6, A5X458, A0A0D4I2T2, A0A0D4I739, A0A0D4IIF5, A0A0D4S892, F7ENE6, J9QMD3, G3GJ67, Q99173, Q8ISI9, M4WGS9, M3VZ86, I7FZD3, F1NT19, I7FZD6, F6U991, U3KC98, A0A077D814, I2GNX4, Q5IFQ6, G1U4P7, I7FZE2, A1XM15, A0A0D4HU11, C7GMQ3, A0A0D4II70, A0A0D4RWS3, A0A0D4S3D7, F5H3C5, A0A0D4S7W8, R4IK89, A0A0C4DFU2, A0A0D4I4Q2, I7F7G9, Q50I72, A0A0C4DFU1, G8JLJ2, A0A075GQV5, K4HBT5, I7FY27, A0A0D4RXF9, A0A…	Superoxide dismutase	InterPro
AP2A2	-2.18	UniProtKB	U3CSV8, W5K672, E9PQP4, G5E675, H3CL14, L1J1P8, H2MVV6, K7D6M6, G3PGB0, A0A0G2JS82, G3T2S6, A0A0G2JRS3, U3EMP8, F1PDT7, H9GR92, F7CVC4, K9J6K8, E9PNC4, A0A0G2JQA4, E9PS94, H9Z5S3, G1PSY1, U3F3N5, K7DFQ1, U3EKV9, A0A0F8B0A6, H0ZHG0, U3KBX9, A0A0G2JRF9, U3EAD7, G1N9N4, H2ZWC7, A0A0D9RDN9, H2ZWC8, H2NCD1, I2CUB9, M3YD34, I3MH11, U3J9R9, M3WI80, T2MIB9, F1RZ02, E9PPZ3, H9FQM0, G1RBZ3, A0A0G2JQM1, U3E…	Uncharacterized protein	InterPro
CEP170B	-2.18	UniProtKB	Q9Y4F5	Centrosomal protein of 170 kDa protein B	UniProt
[truncated: 4,913 more rows]

## Sheet: Spleen vs. Thymus
Differentially expressed genes in Spleen vs. Thymus
[truncated: 7,802 more rows]
