# Supplementary material for: RNA sequencing (RNA-Seq) of lymph node, spleen, and thymus transcriptome from wild Peninsular Malaysian cynomolgus macaque (Macaca fascicularis)
Source: PeerJ. 2017 Aug 17;5:e3566. doi: 10.7717/peerj.3566 (PMC5563440; doi:10.7717/peerj.3566)
Supplement: Table S4 [file peerj-05-3566-s020.xlsx]

## Sheet: Sheet4
Table S3: List of tissue-specific genes in their respective tissues
Lymph	Spleen	Thymus
A3GALT2	ADRA2B	AKR7A3
AADACL3	AHSG	ANKRD9
ABRA	ANKRD2	APLN
ACRBP	ANKRD34B	APOF
ADAM11	ANXA2R	AQP5
ADH1A	APOA1	ASCL3
ADH4	ASB9	ASS1
ADIG	C19H19orf59	C14H11orf71
ADIPOQ	C20H16orf86	C19H19orf33
ADPRHL1	C4H6orf25	C1H1orf172
ADSSL1	C7H14orf180	C4H6orf141
AGMAT	CAMK2N1	C6H5orf38
AHSP	CCDC154	C8H8orf82
AKR1B10	CCDC24	C9H10orf35
ALOX15B	CCL15	CALML3
ALX3	CCL23	CAMSAP3
AMHR2	CHRD	CCDC160
ANGPTL4	CHRM4	CCDC78
ANHX	CLEC1B	CCDC96
ANKK1	CPA1	CD164L2
ANKRD1	CSNK1A1L	CHAD
ANKRD34A	CSTL1	CHCHD5
ANKRD60	DUSP15	CHML
ANKRD66	DUSP9	CLDN7
ANO7	EDDM3A	CLDN8
ANXA9	EME2	CRB3
APCDD1L	EPGN	CSN3
APOBEC1	FAM110D	CST6
APOBEC2	FCN2	CST9L
APOBEC4	FGFR4	CT62
APOH	FITM1	DACT2
AQP11	GDPD2	DBNDD1
AQP8	GJB7	DCAF16
ARGFX	GPR84	DIRAS1
ARL13A	GRM2	DMRT2
ARR3	HCAR1	DMWD
ARSH	HES6	ELF3
ART1	IL12A	ELMO3
ASB16	INMT	EPN3
ASB17	KCNJ11	EPPK1
ASTL	LOC101865680	EPS8L2
ATP1B4	LOC101865886	ESRP2
ATP4A	LOC101867165	FAHD2A
AVP	LOC101867203	FAM110C
AVPR1B	LOC101867305	FAM171A2
B3GNT6	LOC101867335	FAM84A
BMP10	LOC101925473	FBXL16
BPIFA1	LOC102114906	FBXO2
BPIFA3	LOC102114965	FJX1
BPIFB6	LOC102115077	FOLR1
BRSK1	LOC102115481	FOXA1
BSPH1	LOC102115607	FOXI1
BTBD18	LOC102115631	FOXQ1
BTBD19	LOC102115742	FXYD2
C10H20orf85	LOC102115805	FZD9
C10H22orf26	LOC102116144	GADD45G
C10H22orf42	LOC102116459	GDF5
C11H12orf54	LOC102116608	GJB1
C12H2orf72	LOC102116642	GJB2
C13H2orf74	LOC102116961	GNMT
C13H2orf78	LOC102117242	GPR12
C14H11orf34	LOC102117473	HAGHL
C14H11orf40	LOC102117846	HES2
C14H11orf42	LOC102117890	HTN1
C15H9orf131	LOC102118002	IRX1
C15H9orf170	LOC102118223	IRX5
C16H17orf112	LOC102118510	IRX6
C16H17orf64	LOC102119108	ISL2
C16H17orf78	LOC102119558	KIAA0754
C19H19orf18	LOC102120029	KLC3
C19H19orf35	LOC102120151	KLHDC7A
C19H19orf45	LOC102120183	KLK1
C19H19orf55	LOC102120240	KRT14
C19H19orf81	LOC102120258	KRT15
C1H1orf110	LOC102120274	KRT17
C1H1orf189	LOC102120338	KRT5
C2H3orf35	LOC102120761	KRT8
C3H7orf57	LOC102120777	L1TD1
C3H7orf61	LOC102120925	LDHD
C3H7orf76	LOC102120932	LINGO4
C4BPB	LOC102121196	LOC101866239
C4H6orf183	LOC102121425	LOC101866780
C5H4orf26	LOC102121722	LOC101925306
C7H14orf178	LOC102121766	LOC102114839
C7H15orf26	LOC102121802	LOC102114955
C9H10orf99	LOC102122408	LOC102114956
CA14	LOC102122581	LOC102115260
CABP5	LOC102122616	LOC102115317
CACNG7	LOC102122634	LOC102115563
CARD14	LOC102123269	LOC102115698
CASP14	LOC102123282	LOC102115789
CATSPER4	LOC102123662	LOC102116930
CBLC	LOC102123960	LOC102117062
CCDC105	LOC102123980	LOC102117215
CCDC179	LOC102124091	LOC102117622
CCDC27	LOC102124464	LOC102117624
CCDC28B	LOC102124730	LOC102117649
CCDC42	LOC102124748	LOC102119094
CCL17	LOC102124816	LOC102119722
CCL18	LOC102124845	LOC102119851
CCL20	LOC102125504	LOC102119867
CCL22	LOC102125695	LOC102120107
CCR8	LOC102125696	LOC102120557
CD1B	LOC102125736	LOC102120707
CD248	LOC102126005	LOC102121606
CD70	LOC102126316	LOC102122544
CDC42EP2	LOC102126407	LOC102123020
CDCP2	LOC102126645	LOC102123054
CDH24	LOC102126710	LOC102123266
CDX1	LOC102127074	LOC102123290
CEACAM19	LOC102127399	LOC102123542
CELSR3	LOC102127704	LOC102123689
CES4A	LOC102127887	LOC102124455
CFHR2	LOC102128100	LOC102124484
CHIA	LOC102128253	LOC102124736
CHRM5	LOC102128312	LOC102124867
CHRNA2	LOC102128689	LOC102125649
CHRNA4	LOC102128884	LOC102125860
CHRND	LOC102129095	LOC102126261
CHST13	LOC102129373	LOC102126591
CIDEA	LOC102129382	LOC102126684
CILP2	LOC102129779	LOC102126780
CLC	LOC102129827	LOC102127208
CLDN11	LOC102130610	LOC102127335
CLEC12B	LOC102130725	LOC102127469
CLEC3A	LOC102131469	LOC102127838
CLEC4F	LOC102131538	LOC102128362
CLEC4G	LOC102131741	LOC102128426
CLRN3	LOC102131766	LOC102128428
CMA1	LOC102131849	LOC102128633
CNGA4	LOC102132182	LOC102128861
CNTD2	LOC102132261	LOC102129172
CNTN2	LOC102132330	LOC102129296
CORO6	LOC102132395	LOC102129465
CPT1C	LOC102132436	LOC102129466
CPXM1	LOC102132575	LOC102129878
CREB3L3	LOC102132695	LOC102130063
CSN1S1	LOC102132843	LOC102130077
CST11	LOC102132873	LOC102130209
CTRL	LOC102132920	LOC102130265
CTSG	LOC102133309	LOC102130506
CTU2	LOC102133438	LOC102130578
CUZD1	LOC102133522	LOC102131298
CXHXorf66	LOC102133576	LOC102131392
CYGB	LOC102133748	LOC102132096
DAZL	LOC102133771	LOC102132441
DBH	LOC102133799	LOC102132651
DCST1	LOC102134129	LOC102132697
DCST2	LOC102134697	LOC102133066
DEFA1B	LOC102134891	LOC102133162
DEFA4	LOC102135621	LOC102133235
DEFB116	LOC102135669	LOC102133245
DEFB119	LOC102135670	LOC102133304
DEFB121	LOC102136040	LOC102134238
DEFB123	LOC102136192	LOC102134264
DHRS7C	LOC102136364	LOC102134537
DISP2	LOC102136846	LOC102134826
DKKL1	LOC102137072	LOC102135310
DMRT3	LOC102137111	LOC102135330
DMRTC1B	LOC102137218	LOC102135417
DMRTC2	LOC102137243	LOC102135567
DNMT3L	LOC102137406	LOC102135832
DOK7	LOC102137622	LOC102135966
DPPA2	LOC102138399	LOC102136368
DRAXIN	LOC102138584	LOC102136383
DUOX2	LOC102138605	LOC102136413
DUSP13	LOC102138628	LOC102136712
DYDC2	LOC102138959	LOC102136915
DYNAP	LOC102139058	LOC102137197
ELSPBP1	LOC102139102	LOC102137475
EMX1	LOC102139442	LOC102137723
EMX2	LOC102139974	LOC102138034
EPS8L3	LOC102140301	LOC102138412
EPX	LOC102140384	LOC102138504
ESPNL	LOC102140678	LOC102138799
ETV3L	LOC102140772	LOC102138832
ETV4	LOC102140947	LOC102139371
F9	LOC102141008	LOC102139485
FABP12	LOC102141644	LOC102139634
FAM131B	LOC102141648	LOC102139667
FAM132B	LOC102141707	LOC102140170
FAM151A	LOC102141876	LOC102140296
FAM163B	LOC102141923	LOC102140470
FAM180A	LOC102142174	LOC102140511
FAM181A	LOC102142177	LOC102140627
FAM183A	LOC102142296	LOC102140643
FAM19A3	LOC102142321	LOC102141025
FAM203A	LOC102142505	LOC102141052
FAM221B	LOC102142930	LOC102141542
FAM83A	LOC102143263	LOC102141581
FAM92B	LOC102143279	LOC102142299
FBXO24	LOC102143280	LOC102142391
FBXO27	LOC102143370	LOC102142495
FBXW9	LOC102143527	LOC102142723
FCER1A	LOC102144005	LOC102142795
FCRLB	LOC102144541	LOC102142838
FGF16	LOC102144743	LOC102143837
FGF23	LOC102145048	LOC102143980
FGF6	LOC102145095	LOC102144432
FIBCD1	LOC102145211	LOC102144563
FIGLA	LOC102145283	LOC102144644
FNDC9	LOC102145490	LOC102144825
FOXA3	LOC102145495	LOC102145544
FOXF1	LOC102145963	LOC102145549
FOXL1	LOC102145997	LOC102145613
FOXN4	LOC102146324	LOC102145645
FOXR1	LOC102146349	LOC102146012
FTCD	LOC102146426	LOC102146393
FZD10	LOC102146939	LOC102147163
GABRA6	LOC102146968	LRRC26
GABRQ	LOC102147076	LRRC37A2
GAL3ST1	LOC102147174	LRRC8E
GAL3ST2	LOC102147190	LSMEM2
GALP	LOC102147195	MAGIX
GAREML	LRRC10B	MAPK8IP2
GATA1	LYPD3	MFSD6L
GBGT1	METTL7B	MRPL54
GCGR	MST1	MTRNR2L7
GCM1	NHLRC4	MUC1
GDF10	NKX2-3	NANOS1
GHRH	NKX2-5	NEURL2
GHRHR	NKX3-2	NRTN
GHRL	NMUR1	OVOL1
GIF	NUDT11	PCDHB2
GIMD1	OXER1	PCDHGA9
GIP	P2RY1	PGLYRP1
GJA3	PF4	PKP3
GJA9	PF4V1	PLD6
GJB6	PGC	PLIN5
GJC2	PPBP	PLXNB3
GJC3	PROB1	PPP1R14A
GKN1	PTGER1	PRB3
GLI1	RFPL1	PRR15
GLRA4	RNASE9	PRR15L
GLYATL3	ROM1	PRR18
GOLGA8CP	S100A12	PRR4
GOLT1A	SBSN	PRRG2
GOT1L1	SDR9C7	RAB25
GP5	SLITRK4	RAB26
GPAT2	SPATA25	RASD1
GPC2	SRMS	RASD2
GPER1	SYNGR4	RASSF10
GPHB5	SYT8	RBBP8NL
GPR123	TCF21	REEP6
GPR162	TCF23	RHOV
GPR179	TFPI2	RILP
GPR26	TMEM229A	S100A14
GPR31	TMEM257	SCGB3A1
GPR85	TOR4A	SFN
GPRC5D	TRIM51FP	SH2D3A
GPX5	TUBB4A	SIX2
GPX6	VSX2	SLC25A34
GRIN3B	VWA5B2	SLC25A47
GRK1		SLC30A2
GRXCR2		SLC7A4
GSDMB		SLITRK5
GUCA1A		SOWAHA
HES4		SOX2
HIPK4		SYNGR3
HOXA10		TEKT2
HOXA13		TEX40
HOXA7		TH
HOXA9		TJP3
HOXC10		TLCD1
HOXC9		TMC4
HOXD10		TMEM125
HPCAL4		TMEM184A
HRC		TMEM42
HSD3B1		TMEM54
HTR1D		TMEM61
HTR3C		TRAM1L1
HTR3E		TSTD1
IBSP		UFSP1
IFNL3		WFIKKN1
IL1F10		YBX2
IL25		ZBTB42
IL36A		ZG16B
IL5		ZNF750
IL6		ZNF883
IL9R
INCA1
INPP5J
IRG1
ISL1
ISM2
ITGA7
ITGB1BP2
ITPKA
JOSD2
JPH4
KCNA1
KCNA7
KCNH4
KCNS2
KCNV2
KIAA1875
KIF12
KIRREL2
KLF17
KLHL35
KLK13
KLK14
KLK2
KLK5
KRT12
KRT2
KRT20
KRT28
KRT3
KRT39
KRT73
KRT76
KRT77
KRT79
KRT82
LACTBL1
LCTL
LHX2
LHX9
LIPF
LIPJ
LOC101864787
LOC101865054
LOC101865400
LOC101865626
LOC101865988
LOC101866025
LOC101866095
LOC101866160
LOC101866231
LOC101866303
LOC101866426
LOC101866519
LOC101866717
LOC101866829
LOC101866939
LOC101866944
LOC101867029
LOC101867150
LOC101867162
LOC101867369
LOC101867374
LOC101867386
LOC101867437
LOC101925104
LOC101925183
LOC101925200
LOC101925280
LOC101925296
LOC101925355
LOC101925380
LOC101925395
LOC101925497
LOC101925596
LOC101925620
LOC101925781
LOC101925789
LOC101925798
LOC101925867
LOC101925972
LOC101926046
LOC101926100
LOC101926217
LOC101926221
LOC101926363
LOC101926386
LOC101926422
LOC101926543
LOC101926559
LOC101926718
LOC102114783
LOC102114789
LOC102114805
LOC102114815
LOC102114819
LOC102114834
LOC102114847
LOC102114904
LOC102114941
LOC102114958
LOC102114974
LOC102114991
LOC102114998
LOC102115028
LOC102115043
LOC102115089
LOC102115116
LOC102115134
LOC102115139
LOC102115149
LOC102115161
LOC102115176
LOC102115195
LOC102115200
LOC102115227
LOC102115229
LOC102115238
LOC102115276
LOC102115321
LOC102115370
LOC102115399
LOC102115413
LOC102115416
LOC102115449
LOC102115463
LOC102115464
LOC102115472
LOC102115504
LOC102115521
LOC102115538
LOC102115555
LOC102115564
LOC102115574
LOC102115604
LOC102115615
LOC102115626
LOC102115633
LOC102115634
LOC102115661
LOC102115702
LOC102115708
LOC102115723
LOC102115743
LOC102115751
LOC102115773
LOC102115810
LOC102115824
LOC102115838
LOC102115842
LOC102115873
LOC102115900
LOC102115982
LOC102116021
LOC102116064
LOC102116096
LOC102116101
LOC102116103
LOC102116106
LOC102116115
LOC102116117
LOC102116126
LOC102116134
LOC102116141
LOC102116152
LOC102116172
LOC102116226
LOC102116258
LOC102116260
LOC102116282
LOC102116289
LOC102116315
LOC102116331
LOC102116358
LOC102116361
LOC102116379
LOC102116391
LOC102116407
LOC102116414
LOC102116443
LOC102116444
LOC102116521
LOC102116531
LOC102116534
LOC102116565
LOC102116575
LOC102116593
LOC102116611
LOC102116613
LOC102116624
LOC102116633
LOC102116661
LOC102116681
LOC102116696
LOC102116700
LOC102116723
LOC102116726
LOC102116752
LOC102116760
LOC102116780
LOC102116824
LOC102116830
LOC102116834
LOC102116894
LOC102116910
LOC102116929
LOC102116942
LOC102116997
LOC102117002
LOC102117011
LOC102117133
LOC102117148
LOC102117162
LOC102117164
LOC102117188
LOC102117190
LOC102117251
LOC102117265
LOC102117266
LOC102117287
LOC102117301
LOC102117334
LOC102117341
LOC102117346
LOC102117353
LOC102117355
LOC102117362
LOC102117373
LOC102117381
LOC102117393
LOC102117397
LOC102117407
LOC102117422
LOC102117474
LOC102117481
LOC102117498
LOC102117507
LOC102117537
LOC102117554
LOC102117559
LOC102117576
LOC102117581
LOC102117602
LOC102117607
LOC102117612
LOC102117614
LOC102117619
LOC102117625
LOC102117635
LOC102117638
LOC102117644
LOC102117672
LOC102117712
LOC102117749
LOC102117760
LOC102117813
LOC102117841
LOC102117860
LOC102117917
LOC102117926
LOC102117933
LOC102117941
LOC102117973
LOC102117986
LOC102117989
LOC102118013
LOC102118038
LOC102118041
LOC102118080
LOC102118094
LOC102118113
LOC102118133
LOC102118156
LOC102118168
LOC102118178
LOC102118230
LOC102118284
LOC102118288
LOC102118291
LOC102118303
LOC102118313
LOC102118331
LOC102118358
LOC102118368
LOC102118391
LOC102118401
LOC102118419
LOC102118438
LOC102118448
LOC102118456
LOC102118477
LOC102118499
LOC102118518
LOC102118547
LOC102118583
LOC102118588
LOC102118658
LOC102118667
LOC102118669
LOC102118677
LOC102118705
LOC102118727
LOC102118731
LOC102118753
LOC102118756
LOC102118766
LOC102118771
LOC102118775
LOC102118795
LOC102118806
LOC102118807
LOC102118821
LOC102118848
LOC102118850
LOC102118868
LOC102118873
LOC102118879
LOC102118919
LOC102118930
LOC102118931
LOC102118942
LOC102118954
LOC102118973
LOC102118974
LOC102118975
LOC102118985
LOC102118996
LOC102119012
LOC102119013
LOC102119031
LOC102119074
LOC102119105
LOC102119115
LOC102119135
LOC102119154
LOC102119162
LOC102119166
LOC102119184
LOC102119206
LOC102119225
LOC102119249
LOC102119262
LOC102119276
LOC102119277
LOC102119291
LOC102119299
LOC102119305
LOC102119309
LOC102119368
LOC102119378
LOC102119476
LOC102119491
LOC102119493
LOC102119514
LOC102119550
LOC102119568
LOC102119576
LOC102119580
LOC102119592
LOC102119616
LOC102119639
LOC102119651
LOC102119654
LOC102119668
LOC102119740
LOC102119747
LOC102119754
LOC102119755
LOC102119769
LOC102119786
LOC102119793
LOC102119794
LOC102119796
LOC102119801
LOC102119812
LOC102119814
LOC102119824
LOC102119837
LOC102119883
LOC102119895
LOC102119908
LOC102119958
LOC102119977
LOC102119980
LOC102119996
LOC102120012
LOC102120017
LOC102120060
LOC102120082
LOC102120084
LOC102120102
LOC102120109
LOC102120131
LOC102120134
LOC102120137
LOC102120160
LOC102120170
LOC102120176
LOC102120201
LOC102120235
LOC102120289
LOC102120314
LOC102120328
LOC102120331
LOC102120352
LOC102120358
LOC102120384
LOC102120386
LOC102120409
LOC102120471
LOC102120489
LOC102120519
LOC102120563
LOC102120564
LOC102120566
LOC102120578
LOC102120579
LOC102120613
LOC102120614
LOC102120628
LOC102120659
LOC102120668
LOC102120670
LOC102120683
LOC102120689
LOC102120700
LOC102120722
LOC102120733
LOC102120734
LOC102120739
LOC102120763
LOC102120766
LOC102120768
LOC102120784
LOC102120802
LOC102120808
LOC102120822
LOC102120829
LOC102120842
LOC102120851
LOC102120865
LOC102120905
LOC102120910
LOC102120939
LOC102120940
LOC102120959
LOC102120960
LOC102120971
LOC102121025
LOC102121082
LOC102121108
LOC102121128
LOC102121149
LOC102121151
LOC102121160
LOC102121171
LOC102121180
LOC102121208
LOC102121237
LOC102121266
LOC102121269
LOC102121284
LOC102121290
LOC102121291
LOC102121330
LOC102121337
LOC102121352
LOC102121355
LOC102121364
LOC102121381
LOC102121382
LOC102121385
LOC102121393
LOC102121396
LOC102121419
LOC102121420
LOC102121442
LOC102121450
LOC102121458
LOC102121486
LOC102121513
LOC102121531
LOC102121580
LOC102121593
LOC102121595
LOC102121610
LOC102121629
LOC102121639
LOC102121640
LOC102121658
LOC102121691
LOC102121695
LOC102121698
LOC102121709
LOC102121743
LOC102121772
LOC102121810
LOC102121814
LOC102121817
LOC102121821
LOC102121832
LOC102121858
LOC102121865
LOC102121879
LOC102121882
LOC102121889
LOC102121895
LOC102121900
LOC102121917
LOC102121918
LOC102121919
LOC102121943
LOC102121947
LOC102121952
LOC102121962
LOC102121974
LOC102121982
LOC102121996
LOC102122006
LOC102122010
LOC102122019
LOC102122023
LOC102122027
LOC102122040
LOC102122042
LOC102122081
LOC102122130
LOC102122178
LOC102122180
LOC102122185
LOC102122195
LOC102122197
LOC102122246
LOC102122253
LOC102122254
LOC102122255
LOC102122262
LOC102122283
LOC102122326
LOC102122331
LOC102122352
LOC102122362
LOC102122372
LOC102122378
LOC102122386
LOC102122398
LOC102122400
LOC102122413
LOC102122417
LOC102122429
LOC102122431
LOC102122432
LOC102122469
LOC102122472
LOC102122480
LOC102122487
LOC102122492
LOC102122494
LOC102122525
LOC102122539
LOC102122615
LOC102122633
LOC102122642
LOC102122646
LOC102122658
LOC102122661
LOC102122727
LOC102122729
LOC102122745
LOC102122752
LOC102122774
LOC102122782
LOC102122802
LOC102122812
LOC102122848
LOC102122863
LOC102122885
LOC102122904
LOC102122906
LOC102122907
LOC102122912
LOC102122913
LOC102122932
LOC102122951
LOC102123022
LOC102123029
LOC102123037
LOC102123046
LOC102123049
LOC102123073
LOC102123080
LOC102123091
LOC102123098
LOC102123109
LOC102123112
LOC102123120
LOC102123141
LOC102123144
LOC102123147
LOC102123153
LOC102123161
LOC102123163
LOC102123215
LOC102123285
LOC102123293
LOC102123294
LOC102123316
LOC102123327
LOC102123341
LOC102123345
LOC102123346
LOC102123350
LOC102123351
LOC102123372
LOC102123373
LOC102123391
LOC102123451
LOC102123473
LOC102123493
LOC102123495
LOC102123505
LOC102123531
LOC102123559
LOC102123575
LOC102123637
LOC102123664
LOC102123681
LOC102123687
LOC102123714
LOC102123723
LOC102123725
LOC102123728
LOC102123746
LOC102123758
LOC102123769
LOC102123772
LOC102123781
LOC102123809
LOC102123816
LOC102123820
LOC102123833
LOC102123861
LOC102123912
LOC102123927
LOC102123948
LOC102123952
LOC102123959
LOC102123976
LOC102124011
LOC102124016
LOC102124051
LOC102124063
LOC102124085
LOC102124086
LOC102124089
LOC102124095
LOC102124096
LOC102124104
LOC102124112
LOC102124145
LOC102124150
LOC102124155
LOC102124193
LOC102124223
LOC102124234
LOC102124242
LOC102124247
LOC102124266
LOC102124288
LOC102124305
LOC102124324
LOC102124366
LOC102124367
LOC102124390
LOC102124400
LOC102124405
LOC102124445
LOC102124448
LOC102124480
LOC102124493
LOC102124507
LOC102124515
LOC102124539
LOC102124559
LOC102124615
LOC102124632
LOC102124650
LOC102124672
LOC102124689
LOC102124707
LOC102124711
LOC102124749
LOC102124819
LOC102124825
LOC102124834
LOC102124839
LOC102124850
LOC102124861
LOC102124893
LOC102124895
LOC102124908
LOC102124910
LOC102124956
LOC102124960
LOC102124962
LOC102124968
LOC102124979
LOC102124985
LOC102124988
LOC102124996
LOC102124997
LOC102125002
LOC102125026
LOC102125030
LOC102125032
LOC102125042
LOC102125048
LOC102125049
LOC102125066
LOC102125069
LOC102125071
LOC102125083
LOC102125092
LOC102125115
LOC102125127
LOC102125135
LOC102125151
LOC102125174
LOC102125181
LOC102125188
LOC102125239
LOC102125240
LOC102125261
LOC102125275
LOC102125280
LOC102125308
LOC102125343
LOC102125347
LOC102125359
LOC102125385
LOC102125409
LOC102125429
LOC102125441
LOC102125443
LOC102125454
LOC102125458
LOC102125481
LOC102125487
LOC102125493
LOC102125510
LOC102125544
LOC102125580
LOC102125594
LOC102125618
LOC102125628
LOC102125641
LOC102125660
LOC102125679
LOC102125685
LOC102125703
LOC102125705
LOC102125707
LOC102125719
LOC102125746
LOC102125747
LOC102125760
LOC102125766
LOC102125793
LOC102125808
LOC102125814
LOC102125833
LOC102125849
LOC102125864
LOC102125895
LOC102125899
LOC102125909
LOC102125912
LOC102125961
LOC102125967
LOC102125974
LOC102125987
LOC102125993
LOC102126006
LOC102126010
LOC102126021
LOC102126022
LOC102126051
LOC102126096
LOC102126119
LOC102126126
LOC102126139
LOC102126157
LOC102126164
LOC102126165
LOC102126201
LOC102126207
LOC102126210
LOC102126218
LOC102126256
LOC102126295
LOC102126395
LOC102126412
LOC102126420
LOC102126437
LOC102126439
LOC102126445
LOC102126461
LOC102126479
LOC102126488
LOC102126530
LOC102126538
LOC102126546
LOC102126566
LOC102126601
LOC102126604
LOC102126605
LOC102126608
LOC102126641
LOC102126648
LOC102126656
LOC102126672
LOC102126686
LOC102126696
LOC102126735
LOC102126741
LOC102126744
LOC102126875
LOC102126881
LOC102126885
LOC102126900
LOC102126905
LOC102126956
LOC102126958
LOC102126968
LOC102126969
LOC102126982
LOC102126986
LOC102126992
LOC102126998
LOC102127032
LOC102127075
LOC102127088
LOC102127091
LOC102127105
LOC102127117
LOC102127127
LOC102127151
LOC102127162
LOC102127224
LOC102127238
LOC102127255
LOC102127284
LOC102127285
LOC102127296
LOC102127314
LOC102127365
LOC102127387
LOC102127391
LOC102127395
LOC102127404
LOC102127406
LOC102127408
LOC102127414
LOC102127423
LOC102127425
LOC102127437
LOC102127519
LOC102127542
LOC102127566
LOC102127567
LOC102127594
LOC102127610
LOC102127611
LOC102127664
LOC102127696
LOC102127700
LOC102127741
LOC102127764
LOC102127771
LOC102127793
LOC102127802
LOC102127807
LOC102127820
LOC102127823
LOC102127826
LOC102127828
LOC102127830
LOC102127840
LOC102127867
LOC102127877
LOC102127882
LOC102127922
LOC102127929
LOC102127953
LOC102127975
LOC102127996
LOC102128058
LOC102128060
LOC102128067
LOC102128112
LOC102128140
LOC102128144
LOC102128157
LOC102128158
LOC102128162
LOC102128178
LOC102128181
LOC102128199
LOC102128262
LOC102128273
LOC102128274
LOC102128275
LOC102128300
LOC102128308
LOC102128318
LOC102128319
LOC102128335
LOC102128352
LOC102128356
LOC102128357
LOC102128365
LOC102128383
LOC102128387
LOC102128403
LOC102128434
LOC102128438
LOC102128502
LOC102128508
LOC102128519
LOC102128523
LOC102128531
LOC102128558
LOC102128560
LOC102128578
LOC102128695
LOC102128699
LOC102128707
LOC102128748
LOC102128778
LOC102128789
LOC102128793
LOC102128830
LOC102128840
LOC102128856
LOC102128870
LOC102128895
LOC102128943
LOC102128958
LOC102128961
LOC102128963
LOC102128993
LOC102129011
LOC102129031
LOC102129036
LOC102129063
LOC102129066
LOC102129083
LOC102129090
LOC102129093
LOC102129103
LOC102129119
LOC102129124
LOC102129139
LOC102129140
LOC102129141
LOC102129168
LOC102129181
LOC102129191
LOC102129197
LOC102129210
LOC102129225
LOC102129230
LOC102129245
LOC102129270
LOC102129276
LOC102129294
LOC102129308
LOC102129328
LOC102129348
LOC102129351
LOC102129356
LOC102129379
LOC102129387
LOC102129395
LOC102129413
LOC102129414
LOC102129472
LOC102129479
LOC102129511
LOC102129516
LOC102129530
LOC102129532
LOC102129558
LOC102129562
LOC102129566
LOC102129592
LOC102129603
LOC102129614
LOC102129627
LOC102129628
LOC102129670
LOC102129671
LOC102129683
LOC102129701
LOC102129722
LOC102129724
LOC102129727
LOC102129766
LOC102129768
LOC102129772
LOC102129787
LOC102129796
LOC102129808
LOC102129834
LOC102129873
LOC102129883
LOC102129900
LOC102129908
LOC102129923
LOC102129930
LOC102129935
LOC102129952
LOC102129969
LOC102129987
LOC102130016
LOC102130050
LOC102130055
LOC102130079
LOC102130097
LOC102130100
LOC102130131
LOC102130137
LOC102130165
LOC102130184
LOC102130189
LOC102130192
LOC102130193
LOC102130208
LOC102130221
LOC102130227
LOC102130234
LOC102130249
LOC102130295
LOC102130299
LOC102130312
LOC102130338
LOC102130345
LOC102130351
LOC102130354
LOC102130381
LOC102130388
LOC102130449
LOC102130466
LOC102130473
LOC102130492
LOC102130533
LOC102130542
LOC102130553
LOC102130602
LOC102130624
LOC102130637
LOC102130646
LOC102130666
LOC102130686
LOC102130705
LOC102130719
LOC102130720
LOC102130726
LOC102130732
LOC102130739
LOC102130740
LOC102130820
LOC102130838
LOC102130848
LOC102130879
LOC102130882
LOC102130889
LOC102130934
LOC102130979
LOC102130982
LOC102130984
LOC102130995
LOC102131021
LOC102131022
LOC102131023
LOC102131025
LOC102131026
LOC102131060
LOC102131100
LOC102131101
LOC102131123
LOC102131124
LOC102131127
LOC102131138
LOC102131152
LOC102131214
LOC102131258
LOC102131259
LOC102131263
LOC102131270
LOC102131292
LOC102131310
LOC102131330
LOC102131332
LOC102131339
LOC102131345
LOC102131348
LOC102131358
LOC102131359
LOC102131376
LOC102131377
LOC102131389
LOC102131395
LOC102131398
LOC102131404
LOC102131432
LOC102131444
LOC102131449
LOC102131457
LOC102131461
LOC102131489
LOC102131508
LOC102131516
LOC102131522
LOC102131549
LOC102131556
LOC102131562
LOC102131622
LOC102131626
LOC102131628
LOC102131646
LOC102131647
LOC102131656
LOC102131658
LOC102131722
LOC102131724
LOC102131738
LOC102131742
LOC102131765
LOC102131767
LOC102131795
LOC102131814
LOC102131823
LOC102131836
LOC102131856
LOC102131867
LOC102131881
LOC102131897
LOC102131933
LOC102131942
LOC102131948
LOC102131966
LOC102132014
LOC102132026
LOC102132061
LOC102132083
LOC102132112
LOC102132126
LOC102132130
LOC102132131
LOC102132146
LOC102132154
LOC102132190
LOC102132197
LOC102132207
LOC102132234
LOC102132245
LOC102132259
LOC102132263
LOC102132269
LOC102132271
LOC102132304
LOC102132308
LOC102132331
LOC102132350
LOC102132377
LOC102132384
LOC102132413
LOC102132444
LOC102132472
LOC102132474
LOC102132475
LOC102132489
LOC102132507
LOC102132520
LOC102132532
LOC102132538
LOC102132541
LOC102132555
LOC102132570
LOC102132573
LOC102132596
LOC102132645
LOC102132676
LOC102132682
LOC102132683
LOC102132692
LOC102132708
LOC102132731
LOC102132732
LOC102132735
LOC102132756
LOC102132801
LOC102132812
LOC102132817
LOC102132826
LOC102132828
LOC102132833
LOC102132899
LOC102132962
LOC102132967
LOC102132985
LOC102133004
LOC102133010
LOC102133015
LOC102133026
LOC102133047
LOC102133052
LOC102133055
LOC102133067
LOC102133075
LOC102133081
LOC102133100
LOC102133128
LOC102133135
LOC102133141
LOC102133156
LOC102133159
LOC102133165
LOC102133178
LOC102133180
LOC102133201
LOC102133221
LOC102133229
LOC102133266
LOC102133271
LOC102133283
LOC102133286
LOC102133311
LOC102133328
LOC102133340
LOC102133343
LOC102133344
LOC102133357
LOC102133359
LOC102133376
LOC102133395
LOC102133429
LOC102133439
LOC102133464
LOC102133486
LOC102133513
LOC102133516
LOC102133564
LOC102133581
LOC102133618
LOC102133634
LOC102133643
LOC102133647
LOC102133674
LOC102133687
LOC102133720
LOC102133742
LOC102133744
LOC102133779
LOC102133794
LOC102133812
LOC102133819
LOC102133832
LOC102133838
LOC102133862
LOC102133873
LOC102133874
LOC102133883
LOC102133897
LOC102133916
LOC102133930
LOC102133940
LOC102133950
LOC102133954
LOC102133965
LOC102133985
LOC102134013
LOC102134015
LOC102134105
LOC102134124
LOC102134135
LOC102134139
LOC102134172
LOC102134184
LOC102134202
LOC102134242
LOC102134247
LOC102134249
LOC102134257
LOC102134287
LOC102134318
LOC102134320
LOC102134322
LOC102134350
LOC102134375
LOC102134387
LOC102134389
LOC102134396
LOC102134408
LOC102134436
LOC102134448
LOC102134466
LOC102134472
LOC102134476
LOC102134492
LOC102134499
LOC102134502
LOC102134508
LOC102134519
LOC102134532
LOC102134534
LOC102134543
LOC102134598
LOC102134601
LOC102134605
LOC102134622
LOC102134625
LOC102134634
LOC102134676
LOC102134689
LOC102134715
LOC102134729
LOC102134733
LOC102134746
LOC102134747
LOC102134798
LOC102134806
LOC102134879
LOC102134883
LOC102134888
LOC102134896
LOC102134906
LOC102134916
LOC102134920
LOC102134978
LOC102134979
LOC102134984
LOC102134997
LOC102135012
LOC102135019
LOC102135029
LOC102135033
LOC102135048
LOC102135072
LOC102135104
LOC102135125
LOC102135129
LOC102135136
LOC102135157
LOC102135179
LOC102135196
LOC102135201
LOC102135221
LOC102135231
LOC102135249
LOC102135284
LOC102135322
LOC102135342
LOC102135369
LOC102135371
LOC102135378
LOC102135389
LOC102135402
LOC102135439
LOC102135499
LOC102135511
LOC102135522
LOC102135540
LOC102135553
LOC102135573
LOC102135604
LOC102135608
LOC102135633
LOC102135674
LOC102135712
LOC102135731
LOC102135734
LOC102135752
LOC102135756
LOC102135760
LOC102135794
LOC102135817
LOC102135836
LOC102135862
LOC102135863
LOC102135873
LOC102135874
LOC102135883
LOC102135899
LOC102135909
LOC102135914
LOC102135946
LOC102135962
LOC102135984
LOC102135991
LOC102135999
LOC102136001
LOC102136015
LOC102136016
LOC102136034
LOC102136078
LOC102136085
LOC102136102
LOC102136123
LOC102136126
LOC102136136
LOC102136138
LOC102136185
LOC102136186
LOC102136193
LOC102136201
LOC102136203
LOC102136213
LOC102136222
LOC102136253
LOC102136266
LOC102136284
LOC102136288
LOC102136296
LOC102136309
LOC102136310
LOC102136312
LOC102136340
LOC102136351
LOC102136366
LOC102136385
LOC102136412
LOC102136419
LOC102136442
LOC102136452
LOC102136454
LOC102136465
LOC102136488
LOC102136500
LOC102136502
LOC102136525
LOC102136532
LOC102136539
LOC102136552
LOC102136579
LOC102136625
LOC102136668
LOC102136681
LOC102136716
LOC102136747
LOC102136764
LOC102136765
LOC102136835
LOC102136836
LOC102136884
LOC102136885
LOC102136890
LOC102136897
LOC102136916
LOC102136943
LOC102136947
LOC102136967
LOC102136971
LOC102136977
LOC102136982
LOC102136997
LOC102136998
LOC102136999
LOC102137040
LOC102137062
LOC102137064
LOC102137099
LOC102137134
LOC102137135
LOC102137165
LOC102137180
LOC102137209
LOC102137222
LOC102137245
LOC102137255
LOC102137266
LOC102137280
LOC102137284
LOC102137312
LOC102137313
LOC102137391
LOC102137395
LOC102137418
LOC102137429
LOC102137438
LOC102137472
LOC102137487
LOC102137526
LOC102137544
LOC102137589
LOC102137591
LOC102137599
LOC102137604
LOC102137605
LOC102137609
LOC102137616
LOC102137618
LOC102137680
LOC102137690
LOC102137691
LOC102137692
LOC102137699
LOC102137729
LOC102137747
LOC102137762
LOC102137764
LOC102137792
LOC102137793
LOC102137817
LOC102137824
LOC102137875
LOC102137876
LOC102137929
LOC102137948
LOC102137988
LOC102138001
LOC102138008
LOC102138011
LOC102138014
LOC102138018
LOC102138023
LOC102138033
LOC102138037
LOC102138079
LOC102138081
LOC102138094
LOC102138097
LOC102138120
LOC102138127
LOC102138143
LOC102138144
LOC102138151
LOC102138166
LOC102138181
LOC102138203
LOC102138263
LOC102138268
LOC102138288
LOC102138314
LOC102138318
LOC102138320
LOC102138331
LOC102138379
LOC102138421
LOC102138426
LOC102138428
LOC102138459
LOC102138472
LOC102138482
LOC102138507
LOC102138561
LOC102138587
LOC102138598
LOC102138600
LOC102138639
LOC102138672
LOC102138749
LOC102138761
LOC102138764
LOC102138803
LOC102138813
LOC102138818
LOC102138820
LOC102138822
LOC102138844
LOC102138862
LOC102138872
LOC102138890
LOC102138903
LOC102138930
LOC102138979
LOC102139033
LOC102139061
LOC102139062
LOC102139069
LOC102139091
LOC102139131
LOC102139137
LOC102139164
LOC102139168
LOC102139191
LOC102139195
LOC102139228
LOC102139262
LOC102139276
LOC102139278
LOC102139302
LOC102139339
LOC102139347
LOC102139362
LOC102139383
LOC102139395
LOC102139413
LOC102139421
LOC102139422
LOC102139451
LOC102139529
LOC102139542
LOC102139584
LOC102139605
LOC102139621
LOC102139662
LOC102139664
LOC102139693
LOC102139706
LOC102139728
LOC102139757
LOC102139776
LOC102139807
LOC102139813
LOC102139845
LOC102139865
LOC102139899
LOC102139914
LOC102139956
LOC102139961
LOC102139976
LOC102139984
LOC102139993
LOC102140030
LOC102140060
LOC102140064
LOC102140086
LOC102140117
LOC102140143
LOC102140149
LOC102140179
LOC102140184
LOC102140187
LOC102140233
LOC102140264
LOC102140269
LOC102140271
LOC102140291
LOC102140306
LOC102140317
LOC102140334
LOC102140381
LOC102140438
LOC102140441
LOC102140444
LOC102140467
LOC102140475
LOC102140491
LOC102140524
LOC102140525
LOC102140533
LOC102140540
LOC102140556
LOC102140613
LOC102140614
LOC102140633
LOC102140653
LOC102140660
LOC102140677
LOC102140689
LOC102140690
LOC102140713
LOC102140723
LOC102140728
LOC102140732
LOC102140738
LOC102140746
LOC102140752
LOC102140759
LOC102140784
LOC102140796
LOC102140799
LOC102140802
LOC102140803
LOC102140833
LOC102140838
LOC102140846
LOC102140871
LOC102140904
LOC102140920
LOC102140939
LOC102140946
LOC102140953
LOC102140958
LOC102140997
LOC102141010
LOC102141026
LOC102141063
LOC102141081
LOC102141083
LOC102141093
LOC102141103
LOC102141161
LOC102141173
LOC102141179
LOC102141186
LOC102141212
LOC102141218
LOC102141227
LOC102141230
LOC102141247
LOC102141248
LOC102141263
LOC102141266
LOC102141299
LOC102141326
LOC102141336
LOC102141338
LOC102141341
LOC102141393
LOC102141456
LOC102141458
LOC102141463
LOC102141490
LOC102141502
LOC102141529
LOC102141547
[truncated: 632 more rows]
