# Supplementary material for: RNA sequencing (RNA-Seq) of lymph node, spleen, and thymus transcriptome from wild Peninsular Malaysian cynomolgus macaque (Macaca fascicularis)
Source: PeerJ. 2017 Aug 17;5:e3566. doi: 10.7717/peerj.3566 (PMC5563440; doi:10.7717/peerj.3566)
Supplement: Table S5 [file peerj-05-3566-s021.xlsx]

## Sheet: Sheet2
Table S4: Tissue-specific gene comparison with Peng et al. (2014) (comparing with cynomolgus macaque China)
Genes		Peng et al., (2014) (sFPKM)			RNA-Seq (Normalised Means)
	Lymph	Spleen	Thymus	Lymph	Spleen	Thymus
CLEC4G	57.1	0.96	0.63	32.06	0.95	0
CCL20	3.33	0.21	2.35	13.75	0	0.14
SHOX2	0.09	0.06	0.08	12.57	0.79	0.17
SHISA3	6.21	0.17	0.17	12.51	0.4	0
ADIPOQ	28.5	0.09	26.6	9.63	0.92	0.03
PPBP	0.14	12.4	0.21	0.57	87.39	0.81
NKX2-3	2.7	17.6	0	0.47	38.72	0
TCF21	0.59	10.1	0.11	0.4	32.73	0.18
CAMK2N1	0.36	5.4	0.36	0.46	27.58	0.84
CHRM4	0.14	16.4	0.17	0.36	13.52	0.06
PRB3	0	0	0.27	0.94	0.9	1989.26
KLK1	0	0	0	0.7	0.19	653.65
ZG16B	0.16	0.18	0.96	0.29	0.45	548.49
HTN1	0.22	0.19	0.34	0.62	0.13	76.28
CSN3	0.24	0	0	0.71	0.47	45.2
Lymph
Spleen
Thymus
